# Supplementary material for: A waste-minimized protocol for electrochemical reductive amination and its environmental assessment
Source: Royal Society of Chemistry journal article supplement (doi:10.1039/d4gc04847d), 2024-12-03

Electronic supplementary Information

**A waste-minimized protocol for the electrochemical reductive amination and its environmental assessment.**

Simone Trastulli Colangeli,<sup>‡</sup> Filippo Campana,<sup>‡</sup> Francesco Ferlin,<sup>\*</sup> Luigi Vaccaro <sup>\*</sup>

Laboratory of Green S.O.C., Dipartimento di Chimica, Biologia e Biotecnologie, Università di Perugia, Via Elce di Sotto 8, 06123 Perugia, Italy, web: <http://greensoc.chm.unipg.it/>

<sup>‡</sup> The authors have contributed equally

## Table of contents

|                                   |          |
|-----------------------------------|----------|
| 1. General Remarks .....          | ESI – 2  |
| 2. General Procedures .....       | ESI – 3  |
| 3. E-factor calculations .....    | ESI – 4  |
| 4. E-factor table .....           | ESI – 9  |
| 5. Ecoscale data .....            | ESI – 10 |
| 6. LCA data and charts.....       | ESI – 15 |
| 7. Characterization Data.....     | ESI – 26 |
| 8. References.....                | ESI – 48 |
| 9. Copies of the NMR spectra..... | ESI – 48 |

## 1. General Remarks

**General Remarks:** Unless otherwise stated, all chemicals were purchased and used without any further purification. GLC analyses were performed by using Hewlett-Packard HP 5890 SERIES II equipped with a capillary column DB-5MS (30 m, 0.32 mm), a flame ionization detector (FID), and helium or nitrogen as gas carrier. GC-EIMS analyses were carried out by using a Hewlett-Packard HP 6890 N Network GC system/5975 mass selective detector equipped with an electron impact ionizer at 70 eV. Melting points were measured on a Büchi 510 apparatus. NMR spectra were recorded on a Bruker DRXADVANCE 400 MHz ( $^1\text{H}$  at 400 MHz,  $^{13}\text{C}$  at 100.6 MHz and  $^{19}\text{F}$  at 376.4 MHz) in  $\text{CDCl}_3$ ,  $d_6$ -DMSO, Methanol- $d_6$ . Chemical shifts are reported in ppm ( $\delta$ ), coupling constant (J) in Hertz, and multiplicity are reported as follows: s=singlet, bs=broad singlet, d=doublet, dd=double doublet, td=double triplet, t=triplet, m=multiplet. Elemental analysis (EA) was conducted on Elementar UNICUBE® elemental analyzer. Electrodes were polished using polishing pad and  $\text{Al}_2\text{O}_3$  powder. The experimental apparatus consists of a reactor, a common laboratory plate used for magnetic stirring and a programmable DC power supply AXIOMET (AX-3003P). The reactor was built by adapting an aluminium electrode and a graphite electrode (surface inside the vial of 4.5 cm x 0.5 cm; electrode distance 0.6 cm) to a common vial cap. The system was then sealed externally with silicone. The reaction is carried out by adapting the aluminium electrode to the anode and the graphite electrode to the cathode.

## 2. General Procedures

**General procedure A:** In a 8mL vial equipped with a magnetic stirrer and a two electrodes system (aluminium anode and graphite cathode) tetraethylammonium bromide (627.45 mg, 3 mmol), aldehyde **1a-n** (3 mmol), amine **2a-k** (3 mmol) and 3 mL of azeotropic mixture of acetonitrile : water (84% w/w acetonitrile) were consecutively added and the resulting mixture was electrolyzed in CCE at 300 mA under stirring at room temperature until 2.75 F/mol of current were passed (ca. 45 minutes). After reaction completion the mixture was concentrated under reduced pressure. The residue was diluted in 10 mL of ethyl acetate, then it was filtered on cotton using compressed air to speed up the process and concentrated under reduced pressure, giving the product **3a-w** (91-73% yield).

**General procedure B:** In a 8 mL vial equipped with a cap and a magnetic stirrer add ketone **1j-m** (3 mmol) and amine **2a** (3 mmol). Let the mixture stir at 90°C for 5 hours. After this time, let the reaction mixture cool to room temperature, then equip the vial with a two electrodes system (aluminium anode and graphite cathode). Add tetraethylammonium bromide (627.45 mg, 3 mmol) and 3 mL of azeotropic mixture of acetonitrile: water (84% w/w acetonitrile), then electrolyze the resulting mixture in CCE at 300 mA under stirring at room temperature until 2.75 F/mol of current were passed (ca. 45 minutes). After reaction completion the mixture was concentrated under reduced pressure. The residue was diluted in 10 mL of ethyl acetate, then it was filtered on cotton using compressed air to speed up the process and concentrated under reduced pressure, giving the crude product. The crude product is further purified by adding HCl (aq.) (2 eq.). Remove water under reduced pressure, then add a mixture of ethyl acetate:petroleum ether (1:9) in order to obtain hydrochloride salt product **3q-t** (62-51% yield) as white crystal.

**General procedure gram-scale synthesis:** In a 50mL flask equipped with a magnetic stirrer, an ice-bath and a two electrodes system (aluminium anode and graphite cathode) tetraethylammonium bromide (15 mmol), aldehyde **1c** (30 mmol), amine **2a** (30 mmol) and 30 mL of azeotropic mixture of acetonitrile : water (84% w/w acetonitrile) were consecutively added and the resulting mixture was electrolyzed in CCE at 1.5 A under stirring at room temperature until 3 F/mol of current were passed (ca. 100 minutes). After reaction completion, the mixture was distilled using a simple distillation apparatus. The acetonitrile : water azeotrope was recovered at 82%. The residue was then diluted in 100 mL of ethyl acetate, then it was filtered on cotton using compressed air to speed up the process. The obtained mixture was then distilled and ethyl acetate was recovered at 85%, giving the product **3c** as a yellow oil (78% yield).



### 3. E-factor calculations

#### E-factor N-benzylbutan-1-amine (3a)

E-factor (without solvent recovery) = [0.31836g(1a) + 0.21942g(2a) + 0.63048g(TEABr) + 2.442g(azeotrope) + 9.02g(ethyl acetate) – 0.41631g(product 3a)] / [0.41631g(product 3a)] = **29.34**

E-factor (within solvent recovery) = [0.31836g(1a) + 0.21942g(2a) + 0.63048g(TEABr) + 2.442g(azeotrope) + 9.02g(ethyl acetate) – 0.41631g(product 3a) – 2.002g(azeotrope recovered) – 7.667g(ethyl acetate recovered)] / [0.41631g(product 3a)] = **6.11**

#### E-factor N-(4-fluorobenzyl)butan-1-amine (3b)

E-factor (without solvent recovery) = [0.37233g(1b) + 0.21942g(2a) + 0.63048g(TEABr) + 2.442g(azeotrope) + 9.02g(ethyl acetate) – 0.49482g(product 3b)] / [0.49482g(product 3b)] = **24.63**

E-factor (within solvent recovery) = [0.37233g(1b) + 0.21942g(2a) + 0.63048g(TEABr) + 2.442g(azeotrope) + 9.02g(ethyl acetate) – 0.49482g(product 3b) – 2.002g(azeotrope recovered) – 7.667g(ethyl acetate recovered)] / [0.49482g(product 3b)] = **5.09**

#### E-factor N-(4-chlorobenzyl)butan-1-amine (3c)

E-factor (without solvent recovery) = [0.42171g(1c) + 0.21942g(2a) + 0.63048g(TEABr) + 2.442g(azeotrope) + 9.02g(ethyl acetate) – 0.51603g(product 3c)] / [0.51603g(product 3c)] = **23.68**

E-factor (within solvent recovery) = [0.42171g(1c) + 0.21942g(2a) + 0.63048g(TEABr) + 2.442g(azeotrope) + 9.02g(ethyl acetate) – 0.51603g(product 3c) – 2.002g(azeotrope recovered) – 7.667g(ethyl acetate recovered)] / [0.51603g(product 3c)] = **4.94**

#### E-factor N-(3-fluorobenzyl)butan-1-amine (3d)

E-factor (without solvent recovery) = [0.37233g(1d) + 0.21942g(2a) + 0.63048g(TEABr) + 2.442g(azeotrope) + 9.02g(ethyl acetate) – 0.42957g(product 3d)] / [0.42957g(product 3d)] = **28.53**

E-factor (within solvent recovery) = [0.37233g(1d) + 0.21942g(2a) + 0.63048g(TEABr) + 2.442g(azeotrope) + 9.02g(ethyl acetate) – 0.42957g(product 3d) – 2.002g(azeotrope recovered) – 7.667g(ethyl acetate recovered)] / [0.42957g(product 3d)] = **6.02**

#### E-factor N-(3-methoxybenzyl)butan-1-amine (3e)

E-factor (without solvent recovery) = [0.40845g(1e) + 0.21942g(2a) + 0.63048g(TEABr) + 2.442g(azeotrope) + 9.02g(ethyl acetate) – 0.43491g(product 3e)] / [0.43491g(product 3e)] = **28.25**

E-factor (within solvent recovery) = [0.40845g(**1e**) + 0.21942g(**2a**) + 0.63048g(TEABr) + 2.442g(azeotrope) + 9.02g(ethyl acetate) – 0.43491g(product **3e**) – 2.002g(azeotrope recovered) – 7.667g(ethyl acetate recovered)] / [0.43491g(product **3e**)] = **6.02**

#### **E-factor N-(4-propoxybenzyl)butan-1-amine (3f)**

E-factor (without solvent recovery) = [0.4926g(**1f**) + 0.21942g(**2a**) + 0.63048g(TEABr) + 2.442g(azeotrope) + 9.02g(ethyl acetate) – 0.50466g(product **3f**)] / [0.50466g(product **3f**)] = **24.37**

E-factor (within solvent recovery) = [0.4926g(**1f**) + 0.21942g(**2a**) + 0.63048g(TEABr) + 2.442g(azeotrope) + 9.02g(ethyl acetate) – 0.50466g(product **3f**) – 2.002g(azeotrope recovered) – 7.667g(ethyl acetate recovered)] / [0.50466g(product **3f**)] = **5.21**

#### **E-factor N-(2-methylbenzyl)butan-1-amine (3g)**

E-factor (without solvent recovery) = [0.36045g(**1g**) + 0.21942g(**2a**) + 0.63048g(TEABr) + 2.442g(azeotrope) + 9.02g(ethyl acetate) – 0.38826g(product **3g**)] / [0.38826g(product **3g**)] = **31.62**

E-factor (within solvent recovery) = [0.36045g(**1g**) + 0.21942g(**2a**) + 0.63048g(TEABr) + 2.442g(azeotrope) + 9.02g(ethyl acetate) – 0.38826g(product **3g**) – 2.002g(azeotrope recovered) – 7.667g(ethyl acetate recovered)] / [0.38826g(product **3g**)] = **6.74**

#### **E-factor N-(naphthalen-2-ylmethyl)butan-1-amine (3h)**

E-factor (without solvent recovery) = [0.46854g(**1h**) + 0.21942g(**2a**) + 0.63048g(TEABr) + 2.442g(azeotrope) + 9.02g(ethyl acetate) – 0.49278g(product **3h**)] / [0.49278g(product **3h**)] = **24.92**

E-factor (within solvent recovery) = [0.46854g(**1h**) + 0.21942g(**2a**) + 0.63048g(TEABr) + 2.442g(azeotrope) + 9.02g(ethyl acetate) – 0.49278g(product **3h**) – 2.002g(azeotrope recovered) – 7.667g(ethyl acetate recovered)] / [0.49278g(product **3h**)] = **5.32**

#### **E-factor N-(4-chlorobenzyl)hexan-1-amine (3i)**

E-factor (without solvent recovery) = [0.42171g(**1c**) + 0.30357g(**2b**) + 0.63048g(TEABr) + 2.442g(azeotrope) + 9.02g(ethyl acetate) – 0.54861g(product **3i**)] / [0.54861g(product **3i**)] = **22.36**

E-factor (within solvent recovery) = [0.42171g(**1c**) + 0.30357g(**2b**) + 0.63048g(TEABr) + 2.442g(azeotrope) + 9.02g(ethyl acetate) – 0.54861g(product **3i**) – 2.002g(azeotrope recovered) – 7.667g(ethyl acetate recovered)] / [0.54861g(product **3i**)] = **4.74**

#### **E-factor N-(4-chlorobenzyl)pentan-1-amine (3j)**

E-factor (without solvent recovery) = [0.42171g(**1c**) + 0.26151g(**2c**) + 0.63048g(TEABr) + 2.442g(azeotrope) + 9.02g(ethyl acetate) – 0.50181g(product **3j**)] / [0.50181g(product **3j**)] = **24.46**

E-factor (within solvent recovery) = [0.42171g(**1c**) + 0.26151g(**2c**) + 0.63048g(TEABr) + 2.442g(azeotrope) + 9.02g(ethyl acetate) – 0.50181g(product **3j**) – 2.002g(azeotrope recovered) – 7.667g(ethyl acetate recovered)] / [0.50181g(product **3j**)] = **5.19**

#### **E-factor N-(4-chlorobenzyl)octan-1-amine (3k)**

E-factor (without solvent recovery) = [0.42171g(**1c**) + 0.38775g(**2d**) + 0.63048g(TEABr) + 2.442g(azeotrope) + 9.02g(ethyl acetate) – 0.62436g(product **3k**)] / [0.62436g(product **3k**)] = **19.67**

E-factor (within solvent recovery) = [0.42171g(**1c**) + 0.38775g(**2d**) + 0.63048g(TEABr) + 2.442g(azeotrope) + 9.02g(ethyl acetate) – 0.62436g(product **3k**) – 2.002g(azeotrope recovered) – 7.667g(ethyl acetate recovered)] / [0.62436g(product **3k**)] = **4.18**

#### **E-factor N-(4-chlorobenzyl)-2,4,4-trimethylpentan-2-amine (3l)**

E-factor (without solvent recovery) = [0.42171g(**1c**) + 0.38775g(**2e**) + 0.63048g(TEABr) + 2.442g(azeotrope) + 9.02g(ethyl acetate) – 0.63198g(product **3l**)] / [0.63198g(product **3l**)] = **19.42**

E-factor (within solvent recovery) = [0.42171g(**1c**) + 0.38775g(**2e**) + 0.63048g(TEABr) + 2.442g(azeotrope) + 9.02g(ethyl acetate) – 0.63198g(product **3l**) – 2.002g(azeotrope recovered) – 7.667g(ethyl acetate recovered)] / [0.63198g(product **3l**)] = **4.12**

#### **E-factor N-(4-chlorobenzyl)propan-2-amine (3m)**

E-factor (without solvent recovery) = [0.42171g(**1c**) + 0.17733g(**2f**) + 0.63048g(TEABr) + 2.442g(azeotrope) + 9.02g(ethyl acetate) – 0.46287g(product **3m**)] / [0.46287g(product **3m**)] = **26.42**

E-factor (within solvent recovery) = [0.42171g(**1c**) + 0.17733g(**2f**) + 0.63048g(TEABr) + 2.442g(azeotrope) + 9.02g(ethyl acetate) – 0.46287g(product **3m**) – 2.002g(azeotrope recovered) – 7.667g(ethyl acetate recovered)] / [0.46287g(product **3m**)] = **5.53**

#### **E-factor N-(4-chlorobenzyl)cyclohexan-1-amine (3n)**

E-factor (without solvent recovery) = [0.42171g(**1c**) + 0.29754g(**2g**) + 0.63048g(TEABr) + 2.442g(azeotrope) + 9.02g(ethyl acetate) – 0.59067g(product **3n**)] / [0.59067g(product **3n**)] = **20.70**

E-factor (within solvent recovery) = [0.42171g(**1c**) + 0.29754g(**2g**) + 0.63048g(TEABr) + 2.442g(azeotrope) + 9.02g(ethyl acetate) – 0.59067g(product **3n**) – 2.002g(azeotrope recovered) – 7.667g(ethyl acetate recovered)] / [0.59067g(product **3n**)] = **4.32**

#### **E-factor N-(4-chlorobenzyl)cyclopentan-1-amine (3o)**

E-factor (without solvent recovery) = [0.42171g(**1c**) + 0.25545g(**2h**) + 0.63048g(TEABr) + 2.442g(azeotrope) + 9.02g(ethyl acetate) – 0.50961g(product **3o**)] / [0.50961g(product **3o**)] = **24.06**

E-factor (within solvent recovery) = [0.42171g(**1c**) + 0.25545g(**2h**) + 0.63048g(TEABr) + 2.442g(azeotrope) + 9.02g(ethyl acetate) – 0.50961g(product **3o**) – 2.002g(azeotrope recovered) – 7.667g(ethyl acetate recovered)] / [0.50961g(product **3o**)] = **5.09**

#### **E-factor N-benzyl-1-(4-chlorophenyl)methanamine (3p)**

E-factor (without solvent recovery) = [0.42171g(**1c**) + 0.32148g(**2i**) + 0.63048g(TEABr) + 2.442g(azeotrope) + 9.02g(ethyl acetate) – 0.59784g(product **3p**)] / [0.59784g(product **3p**)] = **20.48**

E-factor (within solvent recovery) = [0.42171g(**1c**) + 0.32148g(**2i**) + 0.63048g(TEABr) + 2.442g(azeotrope) + 9.02g(ethyl acetate) – 0.59784g(product **3p**) – 2.002g(azeotrope recovered) – 7.667g(ethyl acetate recovered)] / [0.59784g(product **3p**)] = **4.30**

#### **E-factor N-(1-phenylethyl)butan-1-amine (3q)**

E-factor (without solvent recovery) = [0.36045g(**1i**) + 0.21942g(**2a**) + 0.63048g(TEABr) + 2.442g(azeotrope) + 9.02g(ethyl acetate) – 0.32976g(product **3q**)] / [0.32976g(product **3q**)] = **37.42**

E-factor (within solvent recovery) = [0.36045g(**1i**) + 0.21942g(**2a**) + 0.63048g(TEABr) + 2.442g(azeotrope) + 9.02g(ethyl acetate) – 0.32976g(product **3q**) – 2.002g(azeotrope recovered) – 7.667g(ethyl acetate recovered)] / [0.32976g(product **3q**)] = **8.11**

#### **E-factor N-(1-(p-tolyl)ethyl)butan-1-amine (3r)**

E-factor (without solvent recovery) = [0.40254g(**1j**) + 0.21942g(**2a**) + 0.63048g(TEABr) + 2.442g(azeotrope) + 9.02g(ethyl acetate) – 0.33291g(product **3r**)] / [0.33291g(product **3r**)] = **37.19**

E-factor (within solvent recovery) = [0.40254g(**1j**) + 0.21942g(**2a**) + 0.63048g(TEABr) + 2.442g(azeotrope) + 9.02g(ethyl acetate) – 0.33291g(product **3r**) – 2.002g(azeotrope recovered) – 7.667g(ethyl acetate recovered)] / [0.33291g(product **3r**)] = **8.15**

#### **E-factor N-(1-(4-chlorophenyl)ethyl)butan-1-amine (3s)**

E-factor (without solvent recovery) = [0.46377g(**1k**) + 0.21942g(**2a**) + 0.63048g(TEABr) + 2.442g(azeotrope) + 9.02g(ethyl acetate) – 0.32244g(product **3s**)] / [0.32244g(product **3s**)] = **38.62**

E-factor (within solvent recovery) = [0.46377g(**1k**) + 0.21942g(**2a**) + 0.63048g(TEABr) + 2.442g(azeotrope) + 9.02g(ethyl acetate) – 0.32244g(product **3s**) – 2.002g(azeotrope recovered) – 7.667g(ethyl acetate recovered)] / [0.32244g(product **3s**)] = **8.64**

#### **E-factor N-(1-(naphthalen-1-yl)ethyl)butan-1-amine (3t)**

E-factor (without solvent recovery) = [0.51063g(**1l**) + 0.21942g(**2a**) + 0.63048g(TEABr) + 2.442g(azeotrope) + 9.02g(ethyl acetate) – 0.36150g(product **3t**)] / [0.36150g(product **3t**)] = **34.47**

E-factor (within solvent recovery) = [0.51063g(**1l**) + 0.21942g(**2a**) + 0.63048g(TEABr) + 2.442g(azeotrope) + 9.02g(ethyl acetate) – 0.36150g(product **3t**) – 2.002g(azeotrope recovered) – 7.667g(ethyl acetate recovered)] / [0.36150g(product **3t**)] = **7.73**

#### **E-factor N-butylfurfurylamine (3u)**

E-factor (without solvent recovery) = [0.28827g(**1m**) + 0.21942g(**2a**) + 0.63048g(TEABr) + 2.442g(azeotrope) + 9.02g(ethyl acetate) – 0.34017g(product **3u**)] / [0.34017g(product **3u**)] = **36.04**

E-factor (within solvent recovery) = [0.28827g(**1m**) + 0.21942g(**2a**) + 0.63048g(TEABr) + 2.442g(azeotrope) + 9.02g(ethyl acetate) – 0.34017g(product **3u**) – 2.002g(azeotrope recovered) – 7.667g(ethyl acetate recovered)] / [0.34017g(product **3u**)] = **7.62**

#### **E-factor clobenzorex (3v)**

E-factor (without solvent recovery) = [0.42171g(**1n**) + 0.40563g(**2j**) + 0.63048g(TEABr) + 2.442g(azeotrope) + 9.02g(ethyl acetate) – 0.69320g(product **3v**)] / [0.69320g(product **3v**)] = **17.64**

E-factor (without solvent recovery) = [0.42171g(**1n**) + 0.40563g(**2j**) + 0.63048g(TEABr) + 2.442g(azeotrope) + 9.02g(ethyl acetate) – 0.69320g(product **3v**) – 2.002g(azeotrope recovered) – 7.667g(ethyl acetate recovered)] / [0.69320g(product **3v**)] = **3.69**

#### **E-factor gram-scale synthesis (3c)**

E-factor (without solvent recovery) = [4.2171g(**1c**) + 2.1942g(**2a**) + 3.1524g(TEABr) + 24.42g(azeotrope) + 90.20g(ethyl acetate) – 4.6263g(product **3c**)] / [4.6263g(product **3c**)] = **25.83**

E-factor (within solvent recovery) = [4.2171g(**1c**) + 2.1942g(**2a**) + 3.1524g(TEABr) + 24.42g(azeotrope) + 90.20g(ethyl acetate) – 4.6263g(product **3c**) – 20.024g(azeotrope recovered) – 76.67g(ethyl acetate recovered)] / [4.6263g(product **3c**)] = **4.95**

#### 4. E-factor table

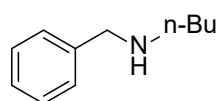

**3a**  
6.16

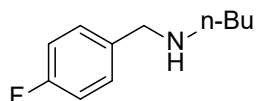

**3b**  
5.09

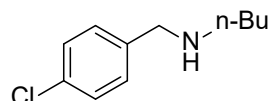

**3c**  
4.94

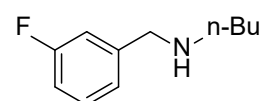

**3d**  
6.02

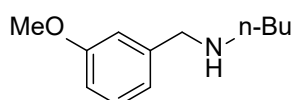

**3e**  
6.01

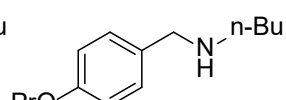

**3f**  
5.22

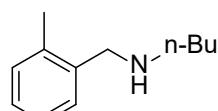

**3g**  
6.74

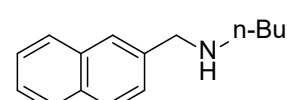

**3h**  
5.32

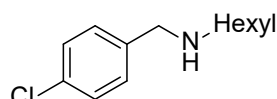

**3i**  
4.74

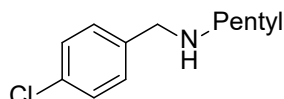

**3j**  
5.19

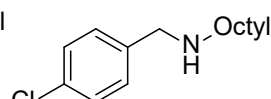

**3k**  
4.18

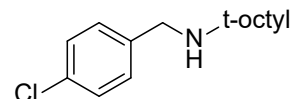

**3l**  
4.12

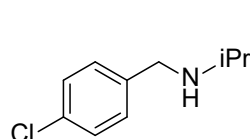

**3m**  
5.53

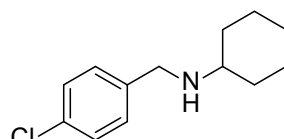

**3n**  
4.32

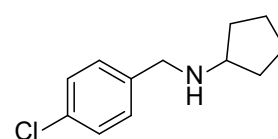

**3o**  
5.09

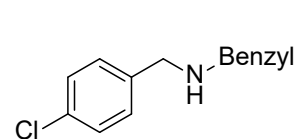

**3p**  
4.30

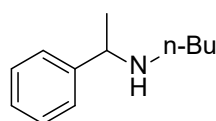

**3q**  
8.11

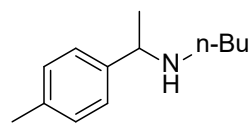

**3r**  
8.15

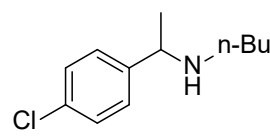

**3s**  
8.64

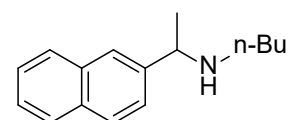

**3t**  
7.73

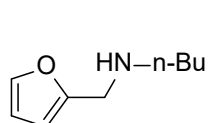

**3u**  
7.62

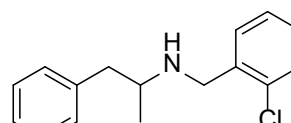

**3v**  
3.69

## 5. Ecoscale data

*Org. Biomol. Chem.*, 2020, **18**, 5832 (Electrochemical)

| Reagents                      |                                       |                                     |                                       |           |             |          |          |       |             |          |  |
|-------------------------------|---------------------------------------|-------------------------------------|---------------------------------------|-----------|-------------|----------|----------|-------|-------------|----------|--|
| <input type="checkbox"/> Link |                                       |                                     |                                       |           |             |          |          |       |             |          |  |
|                               | identifier*                           | name                                | MF*                                   | MW        | density     | purity*  | ml       | g     | mmoles      | equiv.   |  |
| 1                             | <input type="text"/>                  | Benzaldehyde                        | C7H6O                                 | 106.12404 | 1.05        | 100%     | 0.050476 | 0.053 | 0.499415589 | Infinity |  |
| 2                             | <input type="text"/>                  | p-Toluidine                         | C7H9N                                 | 107.15516 |             | 100%     | 0        | 0.064 | 0.597264751 | Infinity |  |
| 3                             | <input type="text"/>                  | Tetrabutylammonium hydrogen sulfate | C16H35N . H2S                         | 339.53408 |             | 100%     | 0        | 0.169 | 0.497740904 | Infinity |  |
| 4                             | <input type="text"/>                  | DMSO                                | C2H6OS                                | 78.12904  | 1.1         | 100%     | 5        | 5.5   | 70.39635966 | Infinity |  |
| 5                             | <input type="text"/>                  | Water                               | H2O                                   | 18.01528  | 1           | 100%     | 10       | 10    | 555.0843506 | Infinity |  |
| 6                             | <input type="text"/>                  | Ethyl acetate                       | C4H8O2                                | 88.10632  | 0.902       | 100%     | 5        | 4.51  | 51.18815540 | Infinity |  |
| Products                      |                                       |                                     |                                       |           |             |          |          |       |             |          |  |
| identifier*:                  | name:                                 | MF*:                                | MW:                                   | g:        | mmoles:     | g theor: | yield:   |       |             |          |  |
| <input type="text"/>          | Reductive Amination Product           | C14H15N                             | 197.28                                | 0.097     | 0.491686942 | 0        | 0        |       |             |          |  |
| Conditions                    |                                       |                                     |                                       |           |             |          |          |       |             |          |  |
| Reagents                      | Name                                  | mmoles                              | eq.                                   | Bp        | Hazard      | Price    |          |       |             |          |  |
|                               | Benzaldehyde                          | 5.14                                | Infinity                              | 179       |             |          |          |       |             |          |  |
|                               | p-Toluidine                           | 6.15                                | Infinity                              | 200       |             |          |          |       |             |          |  |
|                               | Tetrabutylammonium hydrogen sulfate   | 5.13                                | Infinity                              |           |             |          |          |       |             |          |  |
|                               | DMSO                                  | 725.73                              | Infinity                              | 189       |             |          |          |       |             |          |  |
|                               | Water                                 | 5722.51                             | Infinity                              |           |             |          |          |       |             |          |  |
|                               | Ethyl acetate                         | 527.71                              | Infinity                              | 75        |             |          |          |       |             |          |  |
| Yield                         | <input type="text" value="98"/>       |                                     |                                       |           |             | -1       |          |       |             |          |  |
| Price / availability          |                                       |                                     |                                       |           |             | -19      |          |       |             |          |  |
| Safety                        |                                       |                                     |                                       |           |             | -15      |          |       |             |          |  |
| Technical setup               | Possible items                        |                                     | Selected items                        |           |             | -3       |          |       |             |          |  |
|                               | Pressure equipment, > 1 atm           |                                     | Unconventional activation technique   |           |             |          |          |       |             |          |  |
|                               | Any additional special glassware      |                                     | Any additional special glassware      |           |             |          |          |       |             |          |  |
|                               | (line1) max. atmosphere               |                                     |                                       |           |             |          |          |       |             |          |  |
| Temperature / time            | Possible items                        |                                     | Selected items                        |           |             | -1       |          |       |             |          |  |
|                               | Heating, > 1h                         |                                     | Room temperature, < 24h               |           |             |          |          |       |             |          |  |
|                               | Cooling to 0°C                        |                                     |                                       |           |             |          |          |       |             |          |  |
|                               | Cooling, < 0°C                        |                                     |                                       |           |             |          |          |       |             |          |  |
| Workup and purification       | Possible items                        |                                     | Selected items                        |           |             | -13      |          |       |             |          |  |
|                               | Sublimation                           |                                     | Removal of solvent with bp < 150°C    |           |             |          |          |       |             |          |  |
|                               | Liquid - liquid extraction or washing |                                     | Liquid - liquid extraction or washing |           |             |          |          |       |             |          |  |
|                               | Classical chromatography              |                                     | Classical chromatography              |           |             |          |          |       |             |          |  |
| EcoScale                      |                                       |                                     |                                       |           |             |          | 48       |       |             |          |  |

Org.Lett. 2023, 25, 432 (Electrochemical)

| Reagents                      |                          |                                      |               |            |         |         |          |       |             |          |
|-------------------------------|--------------------------|--------------------------------------|---------------|------------|---------|---------|----------|-------|-------------|----------|
| <input type="checkbox"/> Link |                          |                                      |               |            |         |         |          |       |             |          |
|                               | identifier*              | name                                 | MF*           | MW         | density | purity* | ml       | g     | mmoles      | equiv.   |
| 1                             | <input type="checkbox"/> | Benzaldehyde                         | C7H6O         | 106.12404  | 1.05    | 100%    | 0.04     | 0.042 | 0.395763297 | Infinity |
| 2                             | <input type="checkbox"/> | Aniline                              | C6H7N         | 93.12828   | 1.0213  | 100%    | 0.036228 | 0.037 | 0.397301442 | Infinity |
| 3                             | <input type="checkbox"/> | Triethylamine                        | C6H15N        | 101.1918   | 0.728   | 100%    | 0.054945 | 0.04  | 0.395288946 | Infinity |
| 4                             | <input type="checkbox"/> | Tetrabutylammonium tetrafluoroborate | C16H36N . BF4 | 329.272152 |         | 100%    | 0        | 0.066 | 0.200442095 | Infinity |
| 5                             | <input type="checkbox"/> | Water                                | H2O           | 18.01528   | 1       | 100%    | 1.3      | 1.3   | 72.16096558 | Infinity |
| 6                             | <input type="checkbox"/> | 1,4-Dioxane                          | C4H8O2        | 88.10632   | 1.03    | 100%    | 2.7      | 2.781 | 31.56413751 | Infinity |
| 7                             | <input type="checkbox"/> | Dichloromethane                      | CH2Cl2        | 84.93288   | 1.325   | 100%    | 30       | 39.75 | 468.0166267 | Infinity |

  

| Products     |                             |         |        |       |             |          |        |  |  |  |
|--------------|-----------------------------|---------|--------|-------|-------------|----------|--------|--|--|--|
| identifier*: | name:                       | MF*:    | MW:    | g:    | mmoles:     | g theor: | yield: |  |  |  |
|              | Reductive Amination Product | C13H13N | 183.25 | 0.052 | 0.283765347 | 0        | 0      |  |  |  |

  

| Conditions              |                                       |                                                  |          |     |        |       |
|-------------------------|---------------------------------------|--------------------------------------------------|----------|-----|--------|-------|
| Reagents                | Name                                  | mmoles                                           | eq.      | Bp  | Hazard | Price |
|                         | Benzaldehyde                          | 7.61                                             | Infinity |     |        |       |
|                         | Aniline                               | 7.64                                             | Infinity | 181 |        |       |
|                         | Triethylamine                         | 7.6                                              | Infinity | 90  |        |       |
|                         | Tetrabutylammonium tetrafluoroborate  | 3.85                                             | Infinity |     |        |       |
|                         | Water                                 | 1387.71                                          | Infinity |     |        |       |
|                         | 1,4-Dioxane                           | 607                                              | Infinity | 101 |        |       |
|                         | Dichloromethane                       | 9000.31                                          | Infinity | 39  |        |       |
| Yield                   | 71                                    |                                                  |          |     | -14.5  |       |
| Price / availability    |                                       |                                                  |          |     | -22    |       |
| Safety                  |                                       |                                                  |          |     | -20    |       |
| Technical setup         | Possible items                        | Selected items                                   |          |     |        |       |
|                         | Any additional special glassware      | Instruments for controlled addition of chemicals |          |     |        |       |
|                         | (Inert) gas atmosphere                | Unconventional activation technique              |          |     |        |       |
|                         | Glove box                             | Any additional special glassware                 |          | -4  |        |       |
| Temperature / time      | Possible items                        | Selected items                                   |          |     |        |       |
|                         | Heating, > 1h                         | Room temperature, < 1h                           |          |     |        |       |
|                         | Cooling to 0°C                        |                                                  |          | 0   |        |       |
|                         | Cooling, < 0°C                        |                                                  |          |     |        |       |
| Workup and purification | Possible items                        | Selected items                                   |          |     |        |       |
|                         | Sublimation                           | Adding solvent                                   |          |     |        |       |
|                         | Liquid - liquid extraction or washing | Removal of solvent with bp < 150°C               |          |     |        |       |
|                         | Classical chromatography              | Liquid - liquid extraction or washing            |          | -13 |        |       |
| EcoScale                |                                       |                                                  |          |     | 26.5   |       |



J. Org. Chem. 2019, 84, 1421 (with NaBH4)

| Reagents |                          |                      |        |            |         |         |          |        |              |          |
|----------|--------------------------|----------------------|--------|------------|---------|---------|----------|--------|--------------|----------|
| Link     | identifier*              | name                 | MF*    | MW         | density | purity* | ml       | g      | mmoles       | equiv.   |
| 1        | <input type="checkbox"/> | 4-Fluorobenzaldehyde | C7H5FO | 124.114503 | 1.15    | 100%    | 0.323478 | 0.372  | 2.997232321e | Infinity |
| 2        | <input type="checkbox"/> | n-Butylamine         | C4H11N | 73.13804   | 0.74    | 100%    | 0.355405 | 0.263  | 3.595939951e | Infinity |
| 3        | <input type="checkbox"/> | Sodium borohydride   | H4BNa  | 37.83153   | 1.35    | 100%    | 0.125926 | 0.17   | 4.493606259e | Infinity |
| 4        | <input type="checkbox"/> | Methanol             | CH4O   | 32.04216   | 0.791   | 100%    | 15       | 11.865 | 370.2933884e | Infinity |
| 5        | <input type="checkbox"/> | Water                | H2O    | 18.01528   | 1       | 100%    | 10       | 10     | 555.0843506e | Infinity |
| 6        | <input type="checkbox"/> | Dichloromethane      | CH2Cl2 | 84.93288   | 1.325   | 100%    | 20       | 26.5   | 312.01108451 | Infinity |

  

| Products    |                             |          |        |       |              |          |       |           |  |  |
|-------------|-----------------------------|----------|--------|-------|--------------|----------|-------|-----------|--|--|
| identifier* | name                        | MF*      | MW     | g     | mmoles       | g theor. | yield | hazard in |  |  |
|             | Reductive Amination Product | C11H16FN | 181.25 | 0.543 | 2.995862068e | 0        | 0     |           |  |  |

  

| Conditions              |                                                                                                                            |         |                                                                                                                           |      |        |       |      |  |  |  |  |
|-------------------------|----------------------------------------------------------------------------------------------------------------------------|---------|---------------------------------------------------------------------------------------------------------------------------|------|--------|-------|------|--|--|--|--|
| Reagents                | Name                                                                                                                       | mmoles  | eq.                                                                                                                       | Bp   | Hazard | Price |      |  |  |  |  |
|                         | 4-Fluorobenzaldehyde                                                                                                       | 5.51    | Infinity                                                                                                                  |      |        |       |      |  |  |  |  |
|                         | n-Butylamine                                                                                                               | 6.62    | Infinity                                                                                                                  | 78   |        |       |      |  |  |  |  |
|                         | Sodium borohydride                                                                                                         | 8.27    | Infinity                                                                                                                  | 130  |        |       |      |  |  |  |  |
|                         | Methanol                                                                                                                   | 681.93  | Infinity                                                                                                                  | 64.7 |        |       |      |  |  |  |  |
|                         | Water                                                                                                                      | 1022.25 | Infinity                                                                                                                  |      |        |       |      |  |  |  |  |
|                         | Dichloromethane                                                                                                            | 574.6   | Infinity                                                                                                                  | 39   |        |       |      |  |  |  |  |
| Yield                   | 99                                                                                                                         |         |                                                                                                                           |      |        |       | -0.5 |  |  |  |  |
| Price / availability    |                                                                                                                            |         |                                                                                                                           |      |        |       | -11  |  |  |  |  |
| Safety                  |                                                                                                                            |         |                                                                                                                           |      |        |       | -25  |  |  |  |  |
| Technical setup         | Possible items<br>Common set-up<br>Instruments for controlled addition of chemicals<br>Unconventional activation technique |         | Selected items<br>Common set-up                                                                                           |      |        | 0     |      |  |  |  |  |
| Temperature / time      | Possible items<br>Heating, > 1h<br>Cooling to 0°C<br>Cooling, < 0°C                                                        |         | Selected items<br>Room temperature, < 24h<br>Cooling to 0°C                                                               |      |        | -5    |      |  |  |  |  |
| Workup and purification | Possible items<br>Sublimation<br>Liquid - liquid extraction or washing<br>Classical chromatography                         |         | Selected items<br>Removal of solvent with bp < 150°C<br>Liquid - liquid extraction or washing<br>Classical chromatography |      |        | -13   |      |  |  |  |  |
| EcoScale                |                                                                                                                            |         |                                                                                                                           |      |        |       | 45.5 |  |  |  |  |

Green Chem., 2021, 23, 5625 (in flow with Et3SiH)

| Reagents                      |                      |                      |         |            |         |         |           |       |             |          |      |
|-------------------------------|----------------------|----------------------|---------|------------|---------|---------|-----------|-------|-------------|----------|------|
| <input type="checkbox"/> Link |                      |                      |         |            |         |         |           |       |             |          |      |
|                               | identifier*          | name                 | MF*     | MW         | density | purity* | ml        | g     | mmoles      | equiv.   |      |
| 1                             | <input type="text"/> | 4-Fluorobenzaldehyde | C7H5FO  | 124.114503 | 1.15    | 100%    | 9.46087   | 10.88 | 87.66098833 | Infinity |      |
| 2                             | <input type="text"/> | Aniline              | C6H7N   | 93.12828   | 1.0213  | 100%    | 9.546656  | 9.75  | 104.6942990 | Infinity |      |
| 3                             | <input type="text"/> | Triethylsilane       | C6H16Si | 116.27854  | 0.72    | 100%    | 16.902778 | 12.17 | 104.6624768 | Infinity | <br> |
| 4                             | <input type="text"/> | Ethyl acetate        | C4H8O2  | 88.10632   | 0.902   | 100%    | 20        | 18.04 | 204.7526216 | Infinity | <br> |
| 5                             | <input type="text"/> | Water                | H2O     | 18.01528   | 1       | 100%    | 240       | 240   | 13322.02441 | Infinity |      |

  

| Products             |                             |          |        |    |             |          |        |  |  |  |
|----------------------|-----------------------------|----------|--------|----|-------------|----------|--------|--|--|--|
| identifier*          | name                        | MF*      | MW     | g  | mmoles      | g theor: | yield: |  |  |  |
| <input type="text"/> | Reductive Amination Product | C13H12FN | 201.24 | 15 | 74.53786523 | 0        | 0      |  |  |  |

  

| Conditions              |                                                                                                                                                                         |        |                                                                                                                                                                                                   |     |                                  |                                   |  |  |  |  |
|-------------------------|-------------------------------------------------------------------------------------------------------------------------------------------------------------------------|--------|---------------------------------------------------------------------------------------------------------------------------------------------------------------------------------------------------|-----|----------------------------------|-----------------------------------|--|--|--|--|
| Reagents                | Name                                                                                                                                                                    | mmoles | eq.                                                                                                                                                                                               | Bp  | Hazard                           | Price                             |  |  |  |  |
|                         | 4-Fluorobenzaldehyde                                                                                                                                                    | 5.84   | Infinity                                                                                                                                                                                          | NaN |                                  |                                   |  |  |  |  |
|                         | Aniline                                                                                                                                                                 | 6.97   | Infinity                                                                                                                                                                                          | 181 |                                  |                                   |  |  |  |  |
|                         | Triethylsilane                                                                                                                                                          | 6.97   | Infinity                                                                                                                                                                                          | 107 |                                  |                                   |  |  |  |  |
|                         | Ethyl acetate                                                                                                                                                           | 13.65  | Infinity                                                                                                                                                                                          | 75  |                                  |                                   |  |  |  |  |
|                         | Water                                                                                                                                                                   | 888.13 | Infinity                                                                                                                                                                                          |     |                                  |                                   |  |  |  |  |
| Yield                   | <input type="text" value="85"/>                                                                                                                                         |        |                                                                                                                                                                                                   |     |                                  | <input type="text" value="-7.5"/> |  |  |  |  |
| Price / availability    |                                                                                                                                                                         |        |                                                                                                                                                                                                   |     |                                  | <input type="text" value="-6"/>   |  |  |  |  |
| Safety                  |                                                                                                                                                                         |        |                                                                                                                                                                                                   |     |                                  | <input type="text" value="-15"/>  |  |  |  |  |
| Technical setup         | Possible items                                                                                                                                                          |        | Selected items                                                                                                                                                                                    |     |                                  |                                   |  |  |  |  |
|                         | <input type="text" value="Instruments for controlled addition of chemicals"/><br><input checked="" type="checkbox"/> Unconventional activation technique                |        | <input type="text" value="Instruments for controlled addition of chemicals"/><br><input type="checkbox"/> Pressure equipment, > 1 atm                                                             |     | <input type="text" value="-6"/>  |                                   |  |  |  |  |
| Temperature / time      | Possible items                                                                                                                                                          |        | Selected items                                                                                                                                                                                    |     |                                  |                                   |  |  |  |  |
|                         | <input type="text" value="Heating, &gt; 1h"/><br><input type="text" value="Cooling to 0°C"/>                                                                            |        | <input type="text" value="Heating, &gt; 1h"/>                                                                                                                                                     |     | <input type="text" value="-3"/>  |                                   |  |  |  |  |
| Workup and purification | Possible items                                                                                                                                                          |        | Selected items                                                                                                                                                                                    |     |                                  |                                   |  |  |  |  |
|                         | <input type="text" value="Sublimation"/><br><input type="text" value="Liquid - liquid extraction or washing"/><br><input type="text" value="Classical chromatography"/> |        | <input type="text" value="Removal of solvent with bp &lt; 150°C"/><br><input type="text" value="Liquid - liquid extraction or washing"/><br><input type="text" value="Classical chromatography"/> |     | <input type="text" value="-13"/> |                                   |  |  |  |  |
| EcoScale                |                                                                                                                                                                         |        |                                                                                                                                                                                                   |     |                                  | <input type="text" value="49.5"/> |  |  |  |  |

## This work (Electrochemical)

| Reagents                      |                                  |                            |          |                                       |             |          |           |          |              |          |  |
|-------------------------------|----------------------------------|----------------------------|----------|---------------------------------------|-------------|----------|-----------|----------|--------------|----------|--|
| <input type="checkbox"/> Link | identifier*                      | name                       | MF*      | MW                                    | density     | purity*  | ml        | g        | mmoles       | equiv.   |  |
| 1                             | <input type="text"/>             | 4-Fluorobenzaldehyde       | C7H5FO   | 124.114503                            | 1.15        | 100%     | 3.23777   | 3.723435 | 30           | Infinity |  |
| 2                             | <input type="text"/>             | n-Butylamine               | C4H11N   | 73.13804                              | 0.74        | 100%     | 2.965055  | 2.194141 | 30           | Infinity |  |
| 3                             | <input type="text"/>             | Tetraethylammonium bromide | C8H20BrN | 210.1575                              |             | 100%     | 0         | 3.15     | 14.98875843  | Infinity |  |
| 4                             | <input type="text"/>             | Acetonitrile               | CH3CN    | 41.05252                              | 0.781       | 100%     | 32.151088 | 25.11    | 611.6555086C | Infinity |  |
| 5                             | <input type="text"/>             | Water                      | H2O      | 18.01528                              | 1           | 100%     | 4.89      | 4.89     | 271.4362474  | Infinity |  |
| 6                             | <input type="text"/>             | Ethyl acetate              | C4H8O2   | 88.10632                              | 0.902       | 100%     | 100       | 90.2     | 1023.763108C | Infinity |  |
| Products                      |                                  |                            |          |                                       |             |          |           |          |              |          |  |
| identifier*:                  | name:                            | MF*:                       | MW:      | g:                                    | mmoles:     | g theor: | yield:    |          |              |          |  |
| <input type="text"/>          | Reductive Amination Product      | C11H16FN                   | 181.25   | 4.24                                  | 23.39310344 | 0        | 0         |          |              |          |  |
| Conditions                    |                                  |                            |          |                                       |             |          |           |          |              |          |  |
| Reagents                      |                                  |                            |          |                                       |             |          |           |          |              |          |  |
|                               | Name                             | mmoles                     | eq.      | Bp                                    | Hazard      | Price    |           |          |              |          |  |
|                               | 4-Fluorobenzaldehyde             | 7.07                       | Infinity |                                       |             |          |           |          |              |          |  |
|                               | n-Butylamine                     | 7.07                       | Infinity | 78                                    |             |          |           |          |              |          |  |
|                               | Tetraethylammonium bromide       | 3.53                       | Infinity |                                       |             |          |           |          |              |          |  |
|                               | Acetonitrile                     | 144.25                     | Infinity | 81                                    |             |          |           |          |              |          |  |
|                               | Water                            | 64.01                      | Infinity |                                       |             |          |           |          |              |          |  |
|                               | Ethyl acetate                    | 241.45                     | Infinity | 75                                    |             |          |           |          |              |          |  |
| Yield                         | 78                               |                            |          |                                       |             |          | -11       |          |              |          |  |
| Price / availability          |                                  |                            |          |                                       |             |          | -5        |          |              |          |  |
| Safety                        |                                  |                            |          |                                       |             |          | -20       |          |              |          |  |
| Technical setup               | Possible items                   |                            |          | Selected items                        |             |          |           |          |              |          |  |
|                               | Any additional special glassware |                            |          | Unconventional activation technique   |             |          |           |          |              |          |  |
|                               | (Inert) gas atmosphere           |                            |          | Any additional special glassware      |             |          | -3        |          |              |          |  |
|                               | Glove box                        |                            |          |                                       |             |          |           |          |              |          |  |
| Temperature / time            | Possible items                   |                            |          | Selected items                        |             |          |           |          |              |          |  |
|                               | Heating, > 1h                    |                            |          | Room temperature, < 24h               |             |          | -1        |          |              |          |  |
|                               | Cooling to 0°C                   |                            |          |                                       |             |          |           |          |              |          |  |
|                               | Cooling, < 0°C                   |                            |          |                                       |             |          |           |          |              |          |  |
| Workup and purification       | Possible items                   |                            |          | Selected items                        |             |          |           |          |              |          |  |
|                               | Cooling to room temperature      |                            |          | Simple filtration                     |             |          |           |          |              |          |  |
|                               | Adding solvent                   |                            |          | Removal of solvent with bp < 150°C    |             |          | -6        |          |              |          |  |
|                               | Simple filtration                |                            |          | Liquid - liquid extraction or washing |             |          |           |          |              |          |  |
| EcoScale                      |                                  |                            |          |                                       |             |          |           |          |              |          |  |
|                               |                                  |                            |          |                                       |             | 54       |           |          |              |          |  |

## 6. LCA data and charts

### Goal and scope definition

The main aim of the herein presented LCA analysis is to assess the potential environmental impact associated to two different reducing agent ( $\text{NaBH}_4$  and triethylsilane) and three organic electrolytes (tetraethylammonium bromide, tetrabutylammonium hydrogen sulfate, tetrabutylammonium tetrafluoroborate). To give further insight about the electrochemical method developed, Aluminium used as electrode was assessed as well.

The functional unit was defined as 1 g of the desired target product. At the same time, the system boundary was determined based on a cradle-to-gate approach, considering the emissions and resource exploitation for both the extraction and manufacturing of all materials and energy and the respective process's emissions to water, air, and soil. Moreover, it was assumed that all the processes analysed were performed at one location. The environmental effects caused by transport to provide raw materials, and the impacts of chemical factories have been included.<sup>1</sup>

### Inventory analysis

While setting up the LCA analysis, new inventories for different materials had to be created to be included in the model. Given the presence of many data gaps in the literature procedures taken as reference, some assumptions were adopted to construct the dataset.

Generally, for the inventories' construction, a retrosynthetic approach was used, and when not possible because of missing database data or too uncertain secondary data, similar compounds were adopted (e.g., triethylamine instead of t-butylamine,  $\text{CaCl}_2$  instead of  $\text{MgSO}_4$  or  $\text{NaSO}_4$ ,  $\text{NaHCO}_3$  instead of  $\text{Na}_2\text{CO}_3$ ).

The energy utilized in the procedures under investigation for heating, stirring, evaporating, and pumping is not measured or documented. For these reasons, thermodynamics assumptions considering a proportional watt (W) absorption per hour of heating plates (for  $T > 25\text{ }^\circ\text{C}$  procedures such as reactions and distillations or stirring), heating bath (fixed temperature of  $50\text{ }^\circ\text{C}$ ) and vacuum pump were considered.

When using secondary data to create inventories, if the isolated product yield is missing, a 100% value is assumed. General assumptions were made regarding process energy (0.0002 MJ per g of the compound) and electricity consumption (0.000333 KWh per g of the compound) for all unavailable compounds that had to be specifically modeled.<sup>2</sup>

Moreover, when solvent or additive amounts for solutions preparation or purification steps were missing, the volumes were considered based on our expertise.

The emissions to air during the synthetic processes (0.20% volatile input materials) and air (CO<sub>2</sub>), water (river), and sludge emissions after wastewater treatment were calculated as well; No emissions to the soil were determined since no agricultural destination of the digested sludge was considered. In this wastewater treatment, 65.80% of the organic compounds were retained in the sludge, 24.50% were oxidized and emitted to air in the form of CO<sub>2</sub>, and the remaining 9.70% were released into the river.<sup>3,4</sup>

### **Impact assessment**

The impact assessment was modelled with SimaPro v9.6.0.1 software, using ReCiPe 20165 Midpoint (H) and Endpoint (H) and. Precisely, 18 impact categories were considered when ReCiPe 2016 method was used (Global warming; Stratospheric ozone depletion; Human carcinogenic; Human non-carcinogenic toxicity; Fine particulate matter; Ionizing radiation; Ozone formation, Human health; Terrestrial acidification; Freshwater eutrophication; Marine eutrophication; Freshwater ecotoxicity; Water consumption; Land use; Fossil resource scarcity; Mineral resource scarcity; Ozone formation, terrestrial ecosystems; Terrestrial ecotoxicity; Marine ecotoxicity).<sup>5</sup>

Midpoint impact categories and endpoint damage areas (Human health, Ecosystems, and Resources) were analysed from a hierarchical perspective over a 100-year period. Long-term emissions, which affect scenarios beyond 100 years, were excluded due to their high uncertainties and their relationship to heavy metal toxicity. Therefore, they are not particularly relevant in organic chemical processing. The results are presented and analysed in midpoints, and the results are weighted and normalized in endpoint damage areas to compare our approach against others by a single indicator as a benchmark of the global environmental impact. In this process, midpoint characterization results are converted to intermediate units to be weighted and normalized to represent, in millipoints (mPts), the relative impact of the results according to their severity in a global context.

## Inventories

### Inventories for the synthesis processes

**Table S1.** Synthesis of tetrabutylammonium hydrogen sulfate (patent US3816533)

| Inputs                                   | Quantity for 1 g of product | Process air emissions (g) | Wastewater treatment emissions (g) |                    |                    |
|------------------------------------------|-----------------------------|---------------------------|------------------------------------|--------------------|--------------------|
|                                          |                             |                           | CO <sub>2</sub> to air             | Compounds to river | Sludge to landfill |
| tetrabutylammonium hydroxide             | 1.070153                    | -                         | -                                  | -                  | -                  |
| H <sub>2</sub> SO <sub>4</sub>           | 0.404499                    | 0.000809                  | -                                  | -                  | -                  |
| H <sub>2</sub> O                         | 1.605229                    | 0.00321                   | -                                  | 1.602018542        | -                  |
| H <sub>2</sub> O (reaction side product) | 0.0742356                   | -                         | -                                  | 0.0742356          | -                  |
| Chemical factory                         | 4xE-13 p                    | -                         | -                                  | -                  | -                  |
| Electricity                              | 0.338257 KWh                | -                         | -                                  | -                  | -                  |

**Table S2.** Synthesis of tetrabutylammonium tetrafluoroborate (patent US3816533)

| Inputs                                     | Quantity for 1 g of product | Process air emissions (g) | Wastewater treatment emissions (g) |                    |                    |
|--------------------------------------------|-----------------------------|---------------------------|------------------------------------|--------------------|--------------------|
|                                            |                             |                           | CO <sub>2</sub> to air             | Compounds to river | Sludge to landfill |
| Tetrabutylammonium hydroxide               | 0.788046                    | -                         | -                                  | -                  | -                  |
| H <sub>2</sub> O <sup>a</sup> (x TBAH 40%) | 1.182069                    | 0.002364                  | -                                  | 1.179704862        | -                  |
| HBF <sub>4</sub>                           | 0.26665                     | 0.000533                  | -                                  | -                  | -                  |
| H <sub>2</sub> O <sup>b</sup>              | 0.26665                     | 0.000533                  | -                                  | 0.2661167          | -                  |
| Chemical factory                           | 4xE-13 p                    | -                         | -                                  | -                  | -                  |
| Electricity                                | 0.389592 KWh                | -                         | -                                  | -                  | -                  |

<sup>a</sup>Amount calculated to obtain a 40% v/v tetrabutylammonium hydroxide solution; <sup>b</sup>Amount calculated to obtain a 50% v/v HBF<sub>4</sub> solution;

**Table S3.** Synthesis of triethylsilane (patent CN102050833)

| Inputs                 | Quantity for 1 g of product | Process air emissions (g) | Wastewater treatment emissions (g) |                       |                       |
|------------------------|-----------------------------|---------------------------|------------------------------------|-----------------------|-----------------------|
|                        |                             |                           | CO <sub>2</sub> to air             | Compounds to river    | Sludge to landfill    |
| Ethylmagnesium bromide | 5.601156 g                  | -                         | -                                  | 1.339407 <sup>b</sup> | 1.339407 <sup>b</sup> |
| Trichlorosilane        | 1.456075 g                  | 0.002912                  | 0.077673 <sup>a</sup>              | 0.030752              | 0.208607              |
| Diethyl ether          | 11.703123 g                 | 0.023406                  | 0.023406                           | 2.867264              | 7.700652              |
| Chemical factory       | 4xE-13 p                    | -                         | -                                  | -                     | -                     |
| Electricity            | 1.843875 KWh                | -                         | -                                  | -                     | -                     |

<sup>a</sup>As trichlorosilane; <sup>b</sup> 50% of the unreacted material

**Table S4.** Synthesis of tetraethylammonium bromide (patent FR3095437 A1)

| Inputs           | Quantity for 1 g of product | Process air emissions (g) | Wastewater treatment emissions (g) |                    |                    |
|------------------|-----------------------------|---------------------------|------------------------------------|--------------------|--------------------|
|                  |                             |                           | CO <sub>2</sub> to air             | Compounds to river | Sludge to landfill |
| Bromoethane      | 0.89848 g                   | 0.00179696                | 0.08204315                         | 0.03248239         | 0.22034446         |
| Triethylamine    | 0.523364 g                  | 0.001046728               | -                                  | -                  | -                  |
| Acetonitrile     | 1.1231 g                    | 0.0022462                 | 0.2751595                          | 0.1089407          | 0.7389998          |
| Chemical factory | 4xE-13 p                    | -                         | -                                  | -                  | -                  |
| Electricity      | 0.198922 KWh                | -                         | -                                  | -                  | -                  |

### Inventories for the needed compounds in the synthesis processes

**Table S5.** Synthesis of trichlorosilane (directly taken from: *Sustainable Production and Consumption* 2023, **41**, 156–166)

| Inputs                      | Quantity for 1 g of product | Process air emissions (g) | Wastewater treatment emissions (g) |                    |                    |
|-----------------------------|-----------------------------|---------------------------|------------------------------------|--------------------|--------------------|
|                             |                             |                           | CO <sub>2</sub> to air             | Compounds to river | Sludge to landfill |
| Silicon                     | 0.25                        | -                         | -                                  | -                  | 0.1                |
| Air compressed              | 0.00045 m3                  | -                         | -                                  | -                  | -                  |
| H <sub>2</sub> O            | 6.136363                    | -                         | -                                  | -                  | -                  |
| Hydrochloric acid           | 1.670454                    | -                         | -                                  | -                  | -                  |
| Transport lorry (16-32 ton) | 1xE-4 tKm                   | -                         | -                                  | -                  | -                  |
| Transport train             | 6.00E-04 tkm                | -                         | -                                  | -                  | -                  |
| Chemical factory            | 4xE-13 p                    | -                         | -                                  | -                  | -                  |
| Heat from steam             | 0.0002 MJ                   | -                         | -                                  | -                  | -                  |
| Electricity                 | 0.000333 KWh                | -                         | -                                  | -                  | -                  |

**Table S6.** Synthesis of HBr (patent 6036936)

| Inputs                      | Quantity for 1 g of product | Process air emissions (g) | Wastewater treatment emissions (g) |                    |                    |
|-----------------------------|-----------------------------|---------------------------|------------------------------------|--------------------|--------------------|
|                             |                             |                           | CO <sub>2</sub> to air             | Compounds to river | Sludge to landfill |
| H <sub>2</sub>              | 0.012501                    | -                         | -                                  | -                  | -                  |
| Br <sub>2</sub>             | 0.987742                    | -                         | -                                  | -                  | -                  |
| Transport lorry (16-32 ton) | 1xE-4 tKm                   | -                         | -                                  | -                  | -                  |
| Transport train             | 6.00E-04 tkm                | -                         | -                                  | -                  | -                  |
| Chemical factory            | 4xE-13 p                    | -                         | -                                  | -                  | -                  |
| Heat from steam             | 0.0002 MJ                   | -                         | -                                  | -                  | -                  |
| Electricity                 | 0.000333 KWh                | -                         | -                                  | -                  | -                  |

**Table S7.** Synthesis of Bromoethane (DOI: 10.15227/orgsyn.001.0003)

| Inputs                                   | Quantity for 1 g of product | Process air emissions (g) | Wastewater treatment emissions (g) |                       |                    |
|------------------------------------------|-----------------------------|---------------------------|------------------------------------|-----------------------|--------------------|
|                                          |                             |                           | CO <sub>2</sub> to air             | Compounds to river    | Sludge to landfill |
| HBr                                      | 0.886025                    | 0.000286                  | 0.035146 <sup>b</sup>              | 0.013914              | 0.094392           |
| EtOH                                     | 0.445152                    | 0.00089                   | 0.005688                           | 0.002252              | 0.015276           |
| H <sub>2</sub> SO <sub>4</sub>           | 0.890305                    | -                         | -                                  | 0.890305 <sup>c</sup> | -                  |
| H <sub>2</sub> O <sup>a</sup>            | 0.961351                    | 0.001922                  | -                                  | 0.959429              | -                  |
| H <sub>2</sub> O (reaction side product) | 0.16524                     | -                         | -                                  | 0.16524               | -                  |
| Transport lorry (16-32 ton)              | 1xE-4 tKm                   | -                         | -                                  | -                     | -                  |
| Transport train                          | 6.00E-04 tkm                | -                         | -                                  | -                     | -                  |
| Chemical factory                         | 4xE-13 p                    | -                         | -                                  | -                     | -                  |
| Heat from steam                          | 0.0002 MJ                   | -                         | -                                  | -                     | -                  |
| Electricity                              | 0.000333 KWh                | -                         | -                                  | -                     | -                  |

<sup>a</sup>From HBr; <sup>b</sup>As HBr; <sup>c</sup>As sodium sulfate

**Table S8.** Synthesis of ethylmagnesium bromide (patent CN102050833)

| Inputs                      | Quantity for 1 g of product | Process air emissions (g) | Wastewater treatment emissions (g) |                    |                    |
|-----------------------------|-----------------------------|---------------------------|------------------------------------|--------------------|--------------------|
|                             |                             |                           | CO <sub>2</sub> to air             | Compounds to river | Sludge to landfill |
| Bromoethane                 | 0.963105                    | 0.001926                  | -                                  | -                  | -                  |
| Magnesium                   | 0.214692                    | 0.000429                  | -                                  | -                  | -                  |
| Diethyl ether               | 2.564267                    | 0.005128                  | 0.628245                           | 0.248733           | 1.687287           |
| Transport lorry (16-32 ton) | 1xE-4 tKm                   | -                         | -                                  | -                  | -                  |
| Transport train             | 6.00E-04 tkm                | -                         | -                                  | -                  | -                  |
| Chemical factory            | 4xE-13 p                    | -                         | -                                  | -                  | -                  |
| Heat from steam             | 0.0002 MJ                   | -                         | -                                  | -                  | -                  |
| Electricity                 | 0.000333 KWh                | -                         | -                                  | -                  | -                  |



**Table S9.** Synthesis of 1-bromobutane (DOI: 10.15227/orgsyn.001.0003)

| Inputs                                       | Quantity for 1 g of product | Process air emissions (g) | Wastewater treatment emissions (g) |                       |                       |
|----------------------------------------------|-----------------------------|---------------------------|------------------------------------|-----------------------|-----------------------|
|                                              |                             |                           | CO <sub>2</sub> to air             | Compounds to river    | Sludge to landfill    |
| Water                                        | 1.160512                    | 0.002321                  | -                                  | 1.158191              | -                     |
| HBr                                          | 0.76923                     | 0.00153846                | 0.043813595 <sup>b</sup>           | 0.017346607           | 0.117670              |
| H <sub>2</sub> SO <sub>4</sub>               | 0.993589                    | 0.001987                  | 0.243429 <sup>c</sup>              | 0.096378133           | 0.653781562           |
| 1-butanol                                    | 0.56923                     | 0.001138                  | -                                  | -                     | -                     |
| Na <sub>2</sub> CO <sub>3</sub> <sup>a</sup> | 0.032051                    | -                         | -                                  | 0.016025 <sup>d</sup> | 0.016025 <sup>d</sup> |
| Cacl <sub>2</sub>                            | 0.01282                     | -                         | -                                  | 0.00641 <sup>d</sup>  | 0.00641 <sup>d</sup>  |
| water (reaction side product)                | 0.131325                    | -                         | -                                  | 0.131325              | -                     |
| Transport lorry (16-32 ton)                  | 1xE-4 tKm                   | -                         | -                                  | -                     | -                     |
| Transport train                              | 6.00E-04 tkm                | -                         | -                                  | -                     | -                     |
| Chemical factory                             | 4xE-13 p                    | -                         | -                                  | -                     | -                     |
| Heat from steam                              | 0.0002 MJ                   | -                         | -                                  | -                     | -                     |
| Electricity                                  | 0.000333 KWh                | -                         | -                                  | -                     | -                     |

<sup>a</sup> NaHCO<sub>3</sub> used; <sup>b</sup>as HBr; <sup>c</sup>as H<sub>2</sub>SO<sub>4</sub>; <sup>d</sup>50% of the material

**Table S10.** Synthesis of tetrabutylammonium bromide (patent FR3095437 A1)

| Inputs                      | Quantity for 1 g of product | Process air emissions (g) | Wastewater treatment emissions (g) |                    |                    |
|-----------------------------|-----------------------------|---------------------------|------------------------------------|--------------------|--------------------|
|                             |                             |                           | CO <sub>2</sub> to air             | Compounds to river | Sludge to landfill |
| 1-Bromobutane               | 0.72599                     | 0.001452                  | 0.073734465                        | 0.029192829        | 0.198029706        |
| Triethylamine               | 0.341194                    | 0.000682                  | -                                  | -                  | -                  |
| Acetonitrile                | 0.722525                    | 0.001445                  | 0.177018625                        | 0.070084925        | 0.47542145         |
| Transport lorry (16-32 ton) | 1xE-4 tKm                   | -                         | -                                  | -                  | -                  |
| Transport train             | 6.00E-04 tkm                | -                         | -                                  | -                  | -                  |
| Chemical factory            | 4xE-13 p                    | -                         | -                                  | -                  | -                  |
| Heat from steam             | 0.0002 MJ                   | -                         | -                                  | -                  | -                  |
| Electricity                 | 0.000333 KWh                | -                         | -                                  | -                  | -                  |

**Table S11.** Synthesis of tetrabutylammonium hydroxide (patent FR3095437 A1)

| Inputs                      | Quantity for 1 g of product | Process air emissions (g) | Wastewater treatment emissions (g) |                       |                       |
|-----------------------------|-----------------------------|---------------------------|------------------------------------|-----------------------|-----------------------|
|                             |                             |                           | CO <sub>2</sub> to air             | Compounds to river    | Sludge to landfill    |
| Tetrabutylammonium bromide  | 1.242373                    | -                         | -                                  | -                     | -                     |
| Potassium hydroxide         | 0.621186                    | -                         | -                                  | 0.202472 <sup>a</sup> | 0.202472 <sup>a</sup> |
| Methanol                    | 3.105932                    | 0.006212                  | 0.76095334                         | 0.301275404           | 2.043703256           |
| H <sub>2</sub> O            | 2.795339                    | 0.005591                  |                                    | 2.789748              | -                     |
| KBr (reaction side product) | 0.458652                    | -                         | -                                  | 0.229326 <sup>a</sup> | 0.229326 <sup>a</sup> |
| Transport lorry (16-32 ton) | 1xE-4 tKm                   | -                         | -                                  | -                     | -                     |
| Transport train             | 6.00E-04 tkm                | -                         | -                                  | -                     | -                     |
| Chemical factory            | 4xE-13 p                    | -                         | -                                  | -                     | -                     |
| Heat from steam             | 0.0002 MJ                   | -                         | -                                  | -                     | -                     |
| Electricity                 | 0.000333 KWh                | -                         | -                                  | -                     | -                     |

<sup>a</sup>50% of the unreacted material or produced side product

**Table S12.** Synthesis of tetrafluoroboric acid (DOI: 10.1055/b-0035-111176)

| Inputs                      | Quantity for 1 g of product | Process air emissions (g) | Wastewater treatment emissions (g) |                    |                    |
|-----------------------------|-----------------------------|---------------------------|------------------------------------|--------------------|--------------------|
|                             |                             |                           | CO <sub>2</sub> to air             | Compounds to river | Sludge to landfill |
| Boric acid                  | 0.704226                    | 0.001408                  | -                                  | -                  | -                  |
| Hydrofluoric acid           | 0.905434                    | 0.001811                  | -                                  | -                  | -                  |
| H <sub>2</sub> O            | 0.603623                    | 0.001207                  | -                                  | 0.602415754        | -                  |
| Transport lorry (16-32 ton) | 1xE-4 tKm                   | -                         | -                                  | -                  | -                  |
| Transport train             | 6.00E-04 tkm                | -                         | -                                  | -                  | -                  |
| Chemical factory            | 4xE-13 p                    | -                         | -                                  | -                  | -                  |
| Heat from steam             | 0.0002 MJ                   | -                         | -                                  | -                  | -                  |
| Electricity                 | 0.000333 KWh                | -                         | -                                  | -                  | -                  |

## Endpoint and Midpoint characterization

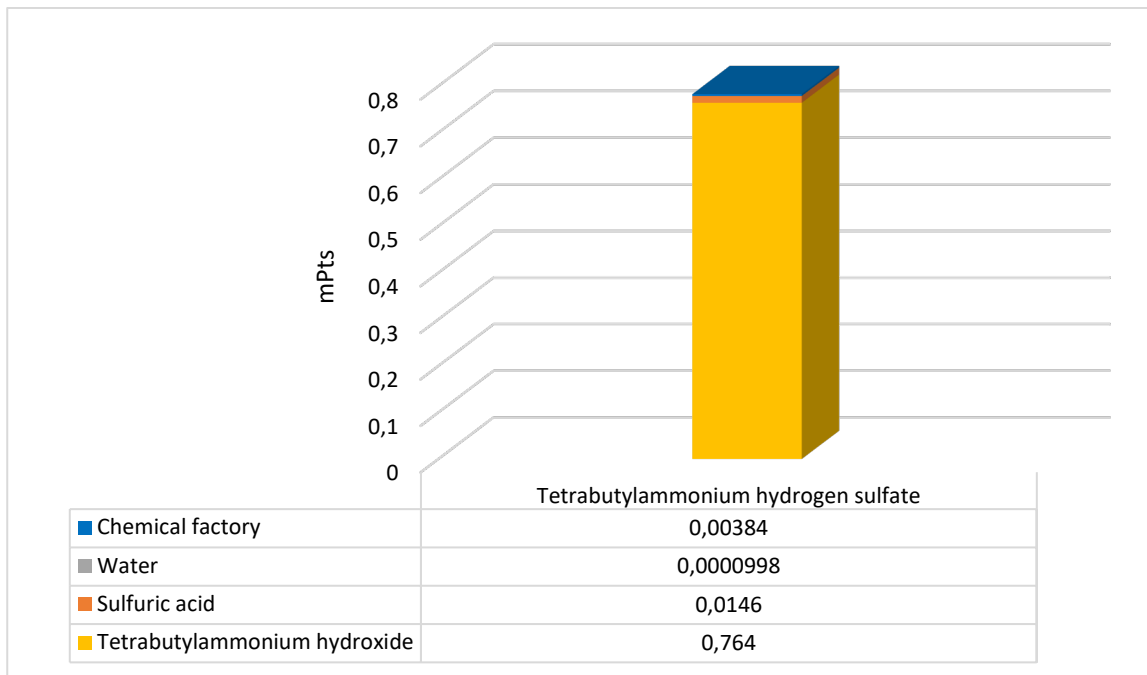

Scheme S1. Endpoint characterization for tetrabutylammonium hydrogen sulfate detailing the single score portion due the other components

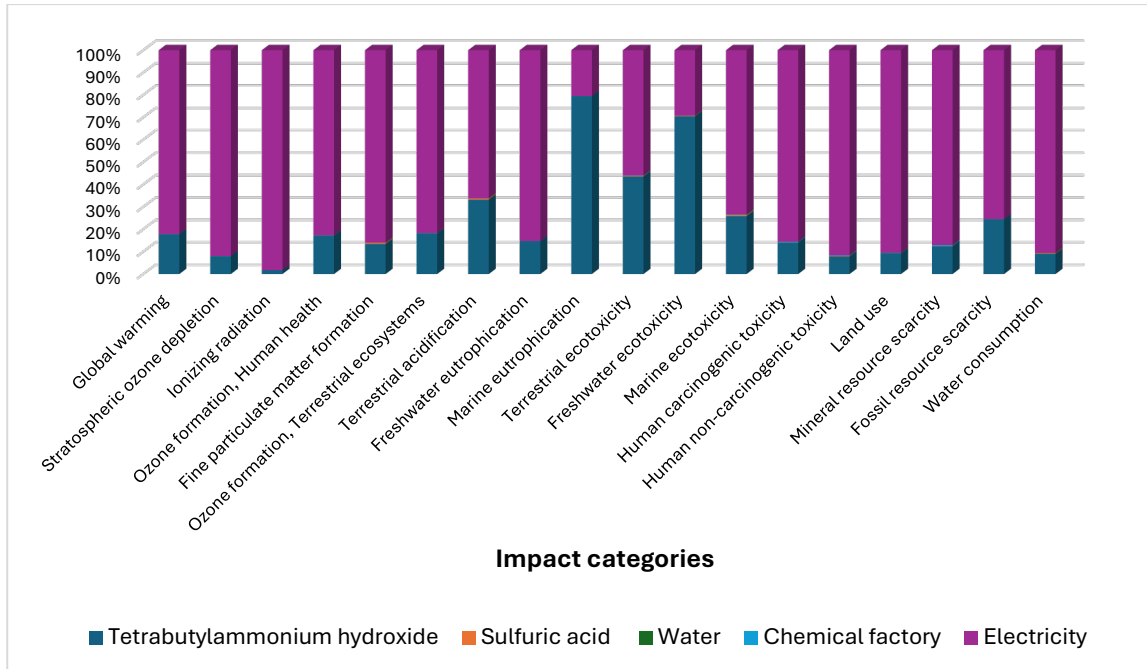

Scheme S2. Midpoint characterization to impact categories for the synthesis of tetrabutylammonium hydrogen sulfate

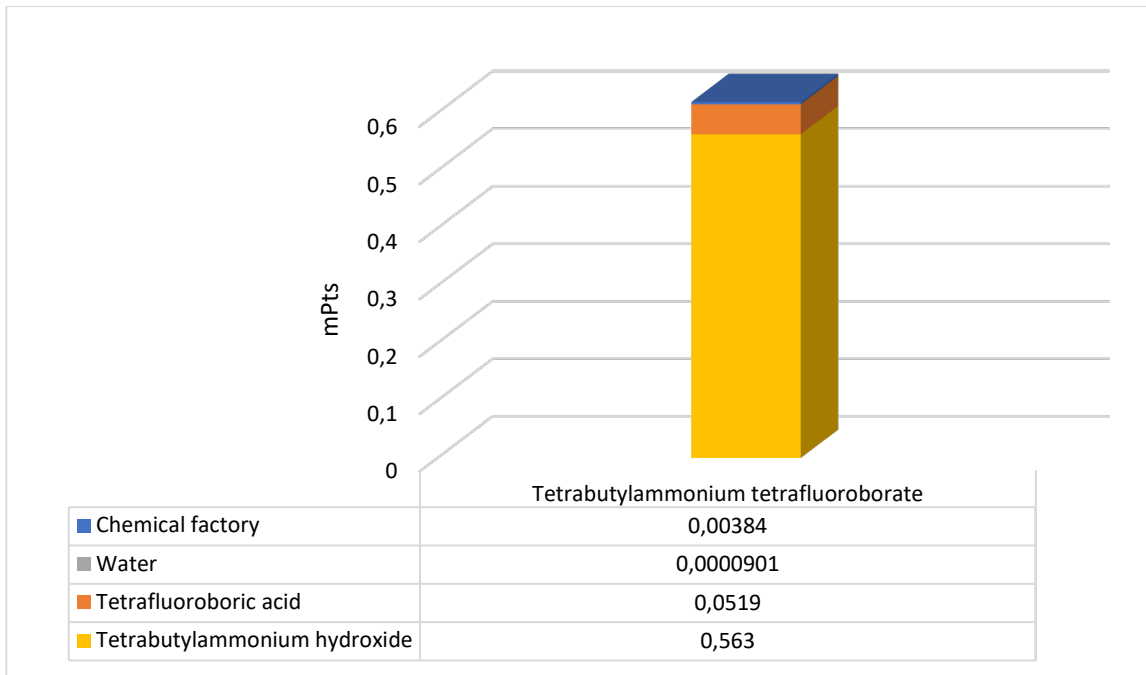

Scheme S3. Endpoint characterization for tetrabutylammonium tetrafluoroborate detailing the single score portion due the other components

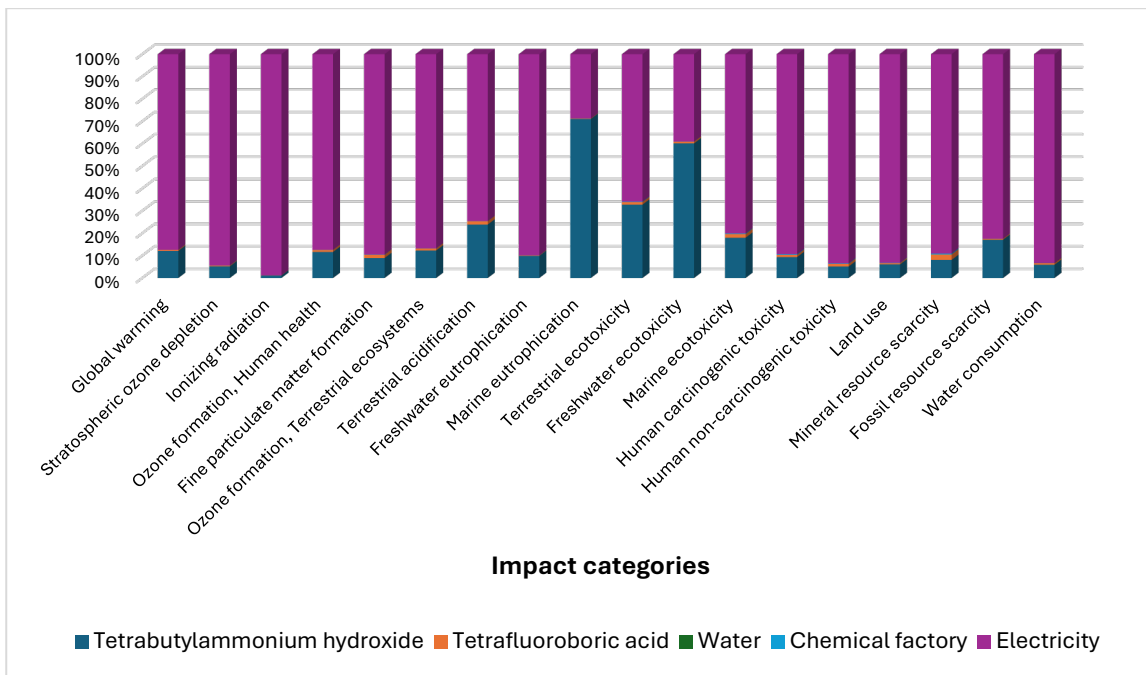

Scheme S4. Midpoint characterization to impact categories for the synthesis of tetrabutylammonium tetrafluoroborate

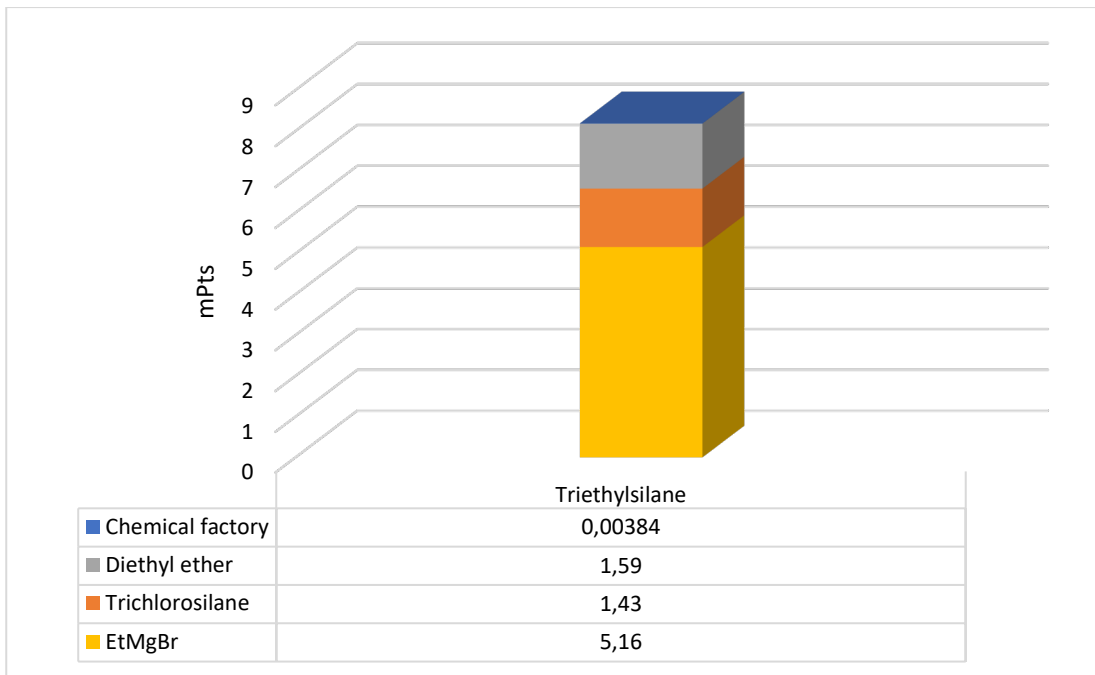

Scheme S5. Endpoint characterization for triethylsilane detailing the single score portion due the other components

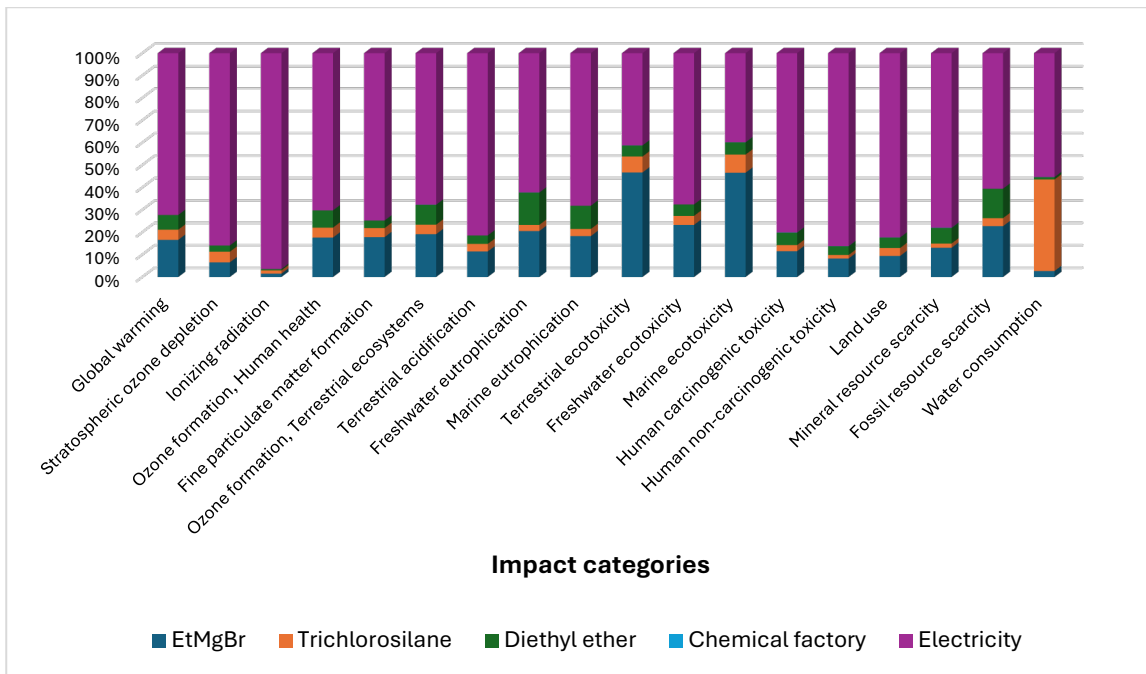

Scheme S6. Midpoint characterization to impact categories for the synthesis of triethylsilane

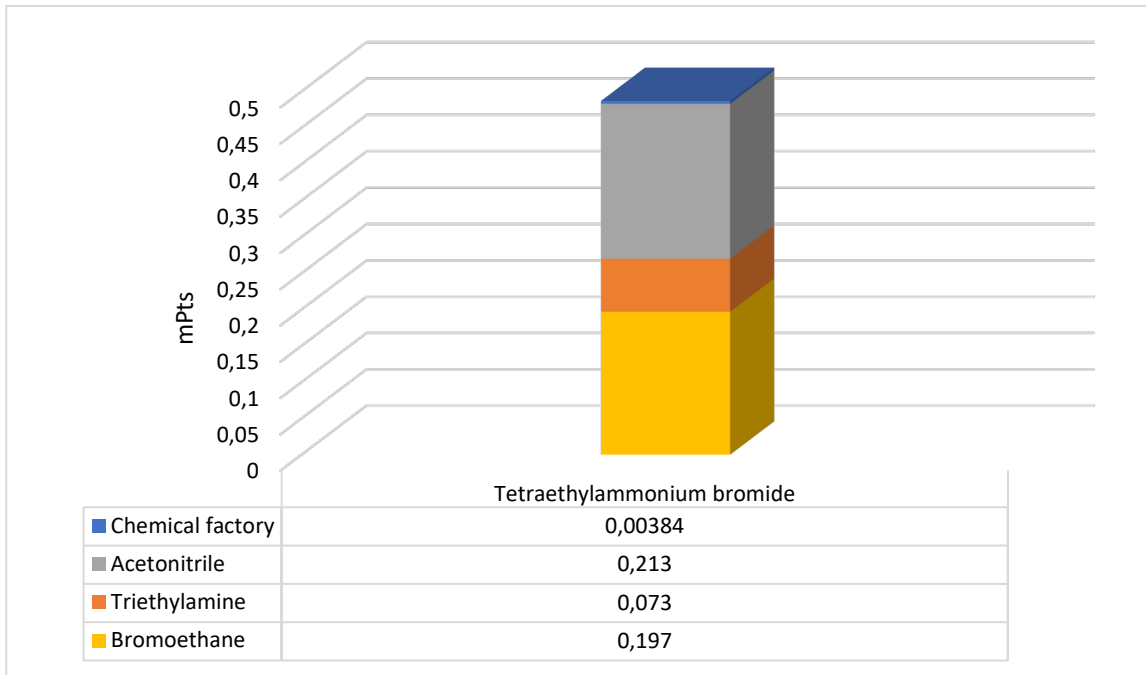

Scheme S7. Endpoint characterization for tetraethylammonium bromide detailing the single score portion due the other components

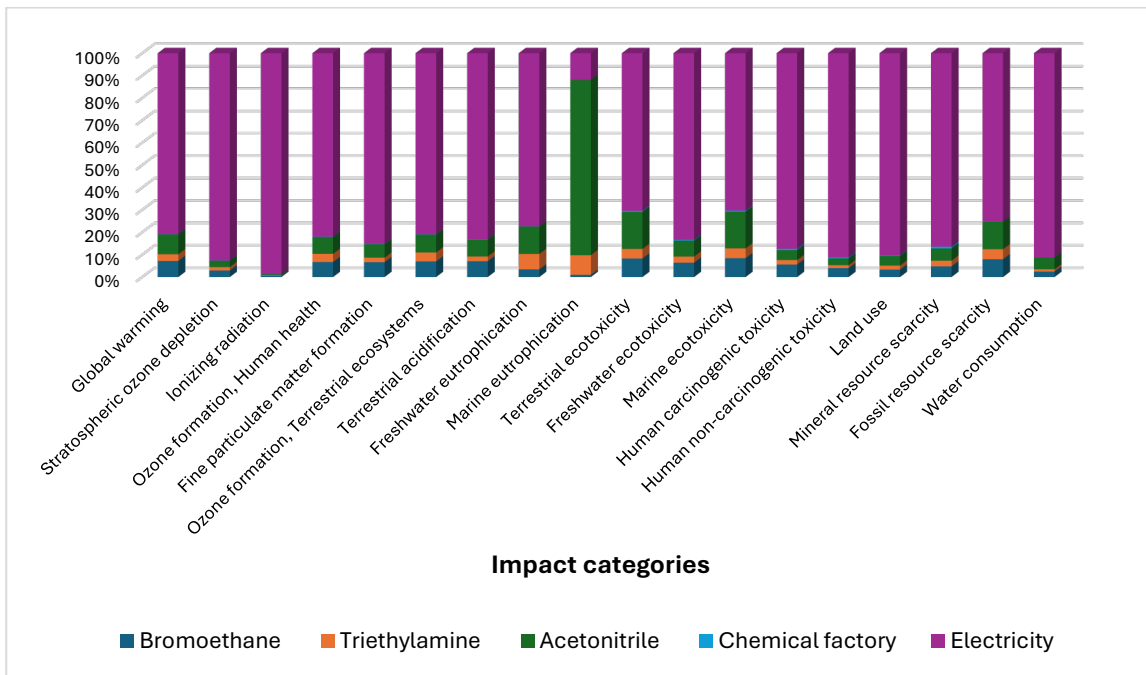

Scheme S8. Midpoint characterization to impact categories for the synthesis of tetraethylammonium bromide

## 7. Characterization Data

|                                                                                                                                                                                                                                                                                                          |                                                                                                                                                                                                                                                                                                                                                                                                                                                                                                                                                                                                                                                                                                                                                                                                                                                                                                       |             |      |            |
|----------------------------------------------------------------------------------------------------------------------------------------------------------------------------------------------------------------------------------------------------------------------------------------------------------|-------------------------------------------------------------------------------------------------------------------------------------------------------------------------------------------------------------------------------------------------------------------------------------------------------------------------------------------------------------------------------------------------------------------------------------------------------------------------------------------------------------------------------------------------------------------------------------------------------------------------------------------------------------------------------------------------------------------------------------------------------------------------------------------------------------------------------------------------------------------------------------------------------|-------------|------|------------|
| <b>Chem. Name</b>                                                                                                                                                                                                                                                                                        | N-benzylbutan-1-amine ( <b>3a</b> )                                                                                                                                                                                                                                                                                                                                                                                                                                                                                                                                                                                                                                                                                                                                                                                                                                                                   |             |      |            |
| <b>Lit. Ref.</b>                                                                                                                                                                                                                                                                                         | N. Shankaraiah, N. Markandeya, V. Srinivasulu, K. Sreekanth, Ch. S. Reddy, L. S. Santos and A. Kamal, <i>J. Org. Chem.</i> , 2011, <b>76</b> , 7017–7026.                                                                                                                                                                                                                                                                                                                                                                                                                                                                                                                                                                                                                                                                                                                                             |             |      |            |
| <p style="text-align: center;"> <math>\text{C}(-) - \text{Al}(+)</math><br/> <math>\text{Et}_4\text{NBr 1 eq}</math><br/> <math>\text{CH}_3\text{CN}:\text{H}_2\text{O (az.) 1M}</math><br/> <math>300\text{mA, r.t., 2.75F/mol}</math> </p> <p style="text-align: center;"><b>3a</b><br/>MW: 163.26</p> |                                                                                                                                                                                                                                                                                                                                                                                                                                                                                                                                                                                                                                                                                                                                                                                                                                                                                                       |             |      |            |
| <b>Method:</b>                                                                                                                                                                                                                                                                                           | <p>Prepared according to general procedure A: in a 8mL vial equipped with a magnetic stirrer and a two electrodes system (aluminium anode and graphite cathode) tetraethylammonium bromide (630.48 mg, 3 mmol), benzaldehyde <b>1a</b> (318.36 mg, 3 mmol), butylamine <b>2a</b> (219.42 mg, 3 mmol) and 3 mL of azeotropic mixture of acetonitrile : water (84% w/w acetonitrile) were consecutively added and the resulting mixture was electrolyzed in CCE at 300 mA under stirring at room temperature until 2.75 F/mol of current were passed (ca. 45 minutes). After reaction completion the mixture was concentrated under reduced pressure. The residue was diluted with 10 mL of ethyl acetate, then it was filtered on cotton using compressed air to speed up the process and concentrated under reduced pressure, giving the product <b>3a</b> as a yellow oil (416.3 mg, 85% yield).</p> |             |      |            |
| <b>Elemental analysis:</b>                                                                                                                                                                                                                                                                               | Calc: C: 80.92; H: 10.50; N: 8.58; Found: C: 80.90; H: 10.51; N: 8.59                                                                                                                                                                                                                                                                                                                                                                                                                                                                                                                                                                                                                                                                                                                                                                                                                                 |             |      |            |
| <b>Mol. Formula</b>                                                                                                                                                                                                                                                                                      | C <sub>11</sub> H <sub>17</sub> N                                                                                                                                                                                                                                                                                                                                                                                                                                                                                                                                                                                                                                                                                                                                                                                                                                                                     | <b>m.p.</b> | oil  |            |
| <b><sup>1</sup>H NMR (400 MHz, CDCl<sub>3</sub>)</b>                                                                                                                                                                                                                                                     | $\delta$ value:                                                                                                                                                                                                                                                                                                                                                                                                                                                                                                                                                                                                                                                                                                                                                                                                                                                                                       | No. H       | Mult | J value/Hz |
|                                                                                                                                                                                                                                                                                                          | 7.21-7.38                                                                                                                                                                                                                                                                                                                                                                                                                                                                                                                                                                                                                                                                                                                                                                                                                                                                                             | 5           | m    |            |
|                                                                                                                                                                                                                                                                                                          | 3.81                                                                                                                                                                                                                                                                                                                                                                                                                                                                                                                                                                                                                                                                                                                                                                                                                                                                                                  | 2           | s    |            |
|                                                                                                                                                                                                                                                                                                          | 2.65                                                                                                                                                                                                                                                                                                                                                                                                                                                                                                                                                                                                                                                                                                                                                                                                                                                                                                  | 2           | t    | 7.2        |
|                                                                                                                                                                                                                                                                                                          | 1.53                                                                                                                                                                                                                                                                                                                                                                                                                                                                                                                                                                                                                                                                                                                                                                                                                                                                                                  | 2           | p    | 7.2        |
|                                                                                                                                                                                                                                                                                                          | 1.37                                                                                                                                                                                                                                                                                                                                                                                                                                                                                                                                                                                                                                                                                                                                                                                                                                                                                                  | 2           | h    | 7.3        |
|                                                                                                                                                                                                                                                                                                          | 0.94                                                                                                                                                                                                                                                                                                                                                                                                                                                                                                                                                                                                                                                                                                                                                                                                                                                                                                  | 3           | t    | 7.3        |
| <b><sup>13</sup>C NMR (100.6 Hz, CDCl<sub>3</sub>)</b>                                                                                                                                                                                                                                                   | $\delta$ : 140.5, 128.4, 128.1, 126.9, 54.1, 49.2, 32.2, 20.5, 14.1.                                                                                                                                                                                                                                                                                                                                                                                                                                                                                                                                                                                                                                                                                                                                                                                                                                  |             |      |            |
| <b>GC-EIMS (m/z, %):</b>                                                                                                                                                                                                                                                                                 | 163(6), 120(81), 118(11), 92(14), 91(100), 65(12).                                                                                                                                                                                                                                                                                                                                                                                                                                                                                                                                                                                                                                                                                                                                                                                                                                                    |             |      |            |





|                                                                                                                                                                                                                                                                                                                                                                                                                                                                                                                                                                                                                                                                                                                                                                                                                                                                                                              |                                                                                                |             |      |            |
|--------------------------------------------------------------------------------------------------------------------------------------------------------------------------------------------------------------------------------------------------------------------------------------------------------------------------------------------------------------------------------------------------------------------------------------------------------------------------------------------------------------------------------------------------------------------------------------------------------------------------------------------------------------------------------------------------------------------------------------------------------------------------------------------------------------------------------------------------------------------------------------------------------------|------------------------------------------------------------------------------------------------|-------------|------|------------|
| <b>Chem. Name</b>                                                                                                                                                                                                                                                                                                                                                                                                                                                                                                                                                                                                                                                                                                                                                                                                                                                                                            | N-(4-chlorobenzyl)butan-1-amine ( <b>3c</b> )                                                  |             |      |            |
| <b>Lit. Ref.</b>                                                                                                                                                                                                                                                                                                                                                                                                                                                                                                                                                                                                                                                                                                                                                                                                                                                                                             | W. Liao, Y. Chen, Y. Liu, H. Duan, J. L. Petersen and X. Shi, <i>Chem. Comm.</i> , 2009, 6436. |             |      |            |
| <p style="text-align: center;"><b>3c</b><br/><b>MW: 197.71</b></p>                                                                                                                                                                                                                                                                                                                                                                                                                                                                                                                                                                                                                                                                                                                                                                                                                                           |                                                                                                |             |      |            |
| <b>Method:</b>                                                                                                                                                                                                                                                                                                                                                                                                                                                                                                                                                                                                                                                                                                                                                                                                                                                                                               |                                                                                                |             |      |            |
| <p>Prepared according to general procedure A: in a 8mL vial equipped with a magnetic stirrer and a two electrodes system (aluminium anode and graphite cathode) tetraethylammonium bromide (630.48 mg, 3 mmol), 4-chlorobenzaldehyde <b>1c</b> (421.71 mg, 3 mmol), butylamine <b>2a</b> (219.42 mg, 3 mmol) and 3 mL of azeotropic mixture of acetonitrile : water (84% w/w acetonitrile) were consecutively added and the resulting mixture was electrolyzed in CCE at 300 mA under stirring at room temperature until 2.75 F/mol of current were passed (ca. 45 minutes). After reaction completion the mixture was concentrated under reduced pressure. The residue was diluted with 10 mL of ethyl acetate, then it was filtered on cotton using compressed air to speed up the process and concentrated under reduced pressure, giving the product <b>3d</b> as a yellow oil (516.0mg, 87% yield).</p> |                                                                                                |             |      |            |
| <b>Elemental analysis:</b> Calc: C: 66.83; H: 8.16; Cl: 17.93; N: 7.08; Found: C: 66.82; H: 8.19; Cl: 17.92; N: 7.07                                                                                                                                                                                                                                                                                                                                                                                                                                                                                                                                                                                                                                                                                                                                                                                         |                                                                                                |             |      |            |
| <b>Mol. Formula</b>                                                                                                                                                                                                                                                                                                                                                                                                                                                                                                                                                                                                                                                                                                                                                                                                                                                                                          | C <sub>11</sub> H <sub>16</sub> ClN                                                            | <b>m.p.</b> | oil  |            |
| <b><sup>1</sup>H NMR (400 MHz, CDCl<sub>3</sub>)</b>                                                                                                                                                                                                                                                                                                                                                                                                                                                                                                                                                                                                                                                                                                                                                                                                                                                         | $\delta$ value:                                                                                | No. H       | Mult | J value/Hz |
|                                                                                                                                                                                                                                                                                                                                                                                                                                                                                                                                                                                                                                                                                                                                                                                                                                                                                                              | 7.28                                                                                           | 4           | m    |            |
|                                                                                                                                                                                                                                                                                                                                                                                                                                                                                                                                                                                                                                                                                                                                                                                                                                                                                                              | 3.75                                                                                           | 2           | s    |            |
|                                                                                                                                                                                                                                                                                                                                                                                                                                                                                                                                                                                                                                                                                                                                                                                                                                                                                                              | 2.61                                                                                           | 2           | t    | 7.2        |
|                                                                                                                                                                                                                                                                                                                                                                                                                                                                                                                                                                                                                                                                                                                                                                                                                                                                                                              | 1.50                                                                                           | 2           | p    | 7.1        |
|                                                                                                                                                                                                                                                                                                                                                                                                                                                                                                                                                                                                                                                                                                                                                                                                                                                                                                              | 1.36                                                                                           | 2           | h    | 7.2        |
|                                                                                                                                                                                                                                                                                                                                                                                                                                                                                                                                                                                                                                                                                                                                                                                                                                                                                                              | 0.92                                                                                           | 3           | t    | 7.3        |
| <b><sup>13</sup>C NMR (100.6 Hz, CDCl<sub>3</sub>)</b> $\delta$ : 139.1, 132.5, 129.4, 128.4, 53.3, 49.1, 32.2, 20.5, 14.0.                                                                                                                                                                                                                                                                                                                                                                                                                                                                                                                                                                                                                                                                                                                                                                                  |                                                                                                |             |      |            |
| <b>GC-EIMS (m/z, %):</b> 197(6), 156(16), 154(53), 127(32), 125(100), 89(11).                                                                                                                                                                                                                                                                                                                                                                                                                                                                                                                                                                                                                                                                                                                                                                                                                                |                                                                                                |             |      |            |

|                                                                                                                                                                                                                                                                                                                                                                                                                                                                                                                                                                                                                                                                                                                                                                                                                                                                                                              |                                               |             |      |            |
|--------------------------------------------------------------------------------------------------------------------------------------------------------------------------------------------------------------------------------------------------------------------------------------------------------------------------------------------------------------------------------------------------------------------------------------------------------------------------------------------------------------------------------------------------------------------------------------------------------------------------------------------------------------------------------------------------------------------------------------------------------------------------------------------------------------------------------------------------------------------------------------------------------------|-----------------------------------------------|-------------|------|------------|
| <b>Chem. Name</b>                                                                                                                                                                                                                                                                                                                                                                                                                                                                                                                                                                                                                                                                                                                                                                                                                                                                                            | N-(3-fluorobenzyl)butan-1-amine ( <b>3d</b> ) |             |      |            |
| <b>Lit. Ref.</b>                                                                                                                                                                                                                                                                                                                                                                                                                                                                                                                                                                                                                                                                                                                                                                                                                                                                                             |                                               |             |      |            |
| <p style="text-align: center;"> <math>\text{1d} + \text{2a} \xrightarrow[\text{CH}_3\text{CN:H}_2\text{O (az.) 1M, 300mA, r.t., 2.75F/mol}]{\text{C(-) - Al(+), Et}_4\text{NBr 1 eq}}</math> </p> <p style="text-align: center;"><b>3d</b><br/>MW: 181.25</p>                                                                                                                                                                                                                                                                                                                                                                                                                                                                                                                                                                                                                                                |                                               |             |      |            |
| <b>Method:</b>                                                                                                                                                                                                                                                                                                                                                                                                                                                                                                                                                                                                                                                                                                                                                                                                                                                                                               |                                               |             |      |            |
| <p>Prepared according to general procedure A: in a 8mL vial equipped with a magnetic stirrer and a two electrodes system (aluminium anode and graphite cathode) tetraethylammonium bromide (627.45 mg, 3 mmol), 3-fluorobenzaldehyde <b>1d</b> (372.33 mg, 3 mmol), butylamine <b>2a</b> (219.42 mg, 3 mmol) and 3 mL of azeotropic mixture of acetonitrile : water (84% w/w acetonitrile) were consecutively added and the resulting mixture was electrolyzed in CCE at 300 mA under stirring at room temperature until 2.75 F/mol of current were passed (ca. 45 minutes). After reaction completion the mixture was concentrated under reduced pressure. The residue was diluted with 10 mL of ethyl acetate, then it was filtered on cotton using compressed air to speed up the process and concentrated under reduced pressure, giving the product <b>3d</b> as a yellow oil (429.6mg, 79% yield).</p> |                                               |             |      |            |
| <b>Elemental analysis:</b> Calc: C: 72.89; H: 8.90; F: 10.48; N: 7.73; Found: C: 72.88; H: 8.93; F: 10.46; N: 7.72                                                                                                                                                                                                                                                                                                                                                                                                                                                                                                                                                                                                                                                                                                                                                                                           |                                               |             |      |            |
| <b>Mol. Formula</b>                                                                                                                                                                                                                                                                                                                                                                                                                                                                                                                                                                                                                                                                                                                                                                                                                                                                                          | C <sub>11</sub> H <sub>16</sub> FN            | <b>m.p.</b> | oil  |            |
| <b><sup>1</sup>H NMR (400 MHz, CDCl<sub>3</sub>)</b>                                                                                                                                                                                                                                                                                                                                                                                                                                                                                                                                                                                                                                                                                                                                                                                                                                                         | $\delta$ value:                               | No. H       | Mult | J value/Hz |
|                                                                                                                                                                                                                                                                                                                                                                                                                                                                                                                                                                                                                                                                                                                                                                                                                                                                                                              | 7.26                                          | 1           | m    |            |
|                                                                                                                                                                                                                                                                                                                                                                                                                                                                                                                                                                                                                                                                                                                                                                                                                                                                                                              | 7.07                                          | 2           | m    |            |
|                                                                                                                                                                                                                                                                                                                                                                                                                                                                                                                                                                                                                                                                                                                                                                                                                                                                                                              | 6.93                                          | 1           | m    |            |
|                                                                                                                                                                                                                                                                                                                                                                                                                                                                                                                                                                                                                                                                                                                                                                                                                                                                                                              | 3.77                                          | 2           | s    |            |
|                                                                                                                                                                                                                                                                                                                                                                                                                                                                                                                                                                                                                                                                                                                                                                                                                                                                                                              | 2.61                                          | 2           | t    | 7.2        |
|                                                                                                                                                                                                                                                                                                                                                                                                                                                                                                                                                                                                                                                                                                                                                                                                                                                                                                              | 1.50                                          | 2           | p    | 7.1        |
|                                                                                                                                                                                                                                                                                                                                                                                                                                                                                                                                                                                                                                                                                                                                                                                                                                                                                                              | 1.37                                          | 2           | h    | 7.2        |
| 0.92                                                                                                                                                                                                                                                                                                                                                                                                                                                                                                                                                                                                                                                                                                                                                                                                                                                                                                         | 3                                             | t           | 7.4  |            |
| <b><sup>13</sup>C NMR (100.6 Hz, CDCl<sub>3</sub>) <math>\delta</math>:</b> 163.0 ( $J_{\text{C-F}}=245.4\text{Hz}$ ), 143.3 ( $J_{\text{C-F}}=6.8\text{Hz}$ ), 129.7 ( $J_{\text{C-F}}=8.2\text{Hz}$ ), 123.5 ( $J_{\text{C-F}}=2.8\text{Hz}$ ), 114.8 ( $J_{\text{C-F}}=21.2\text{Hz}$ ), 113.6 ( $J_{\text{C-F}}=21.1\text{Hz}$ ), 53.5, 49.1, 32.2, 20.4, 14.0.                                                                                                                                                                                                                                                                                                                                                                                                                                                                                                                                          |                                               |             |      |            |
| <b><sup>19</sup>F NMR (376 MHz, CDCl<sub>3</sub>) <math>\delta</math>:</b> - 113.6                                                                                                                                                                                                                                                                                                                                                                                                                                                                                                                                                                                                                                                                                                                                                                                                                           |                                               |             |      |            |
| <b>GC-EIMS (m/z, %):</b> 181(5), 136(66), 109(100).                                                                                                                                                                                                                                                                                                                                                                                                                                                                                                                                                                                                                                                                                                                                                                                                                                                          |                                               |             |      |            |



|                                                                                                                                                                                                                                                                                                                                                                                                                                                                                                                                                                                                                                                                                                                                                                                                                                                                                                            |                                                |             |      |            |
|------------------------------------------------------------------------------------------------------------------------------------------------------------------------------------------------------------------------------------------------------------------------------------------------------------------------------------------------------------------------------------------------------------------------------------------------------------------------------------------------------------------------------------------------------------------------------------------------------------------------------------------------------------------------------------------------------------------------------------------------------------------------------------------------------------------------------------------------------------------------------------------------------------|------------------------------------------------|-------------|------|------------|
| <b>Chem. Name</b>                                                                                                                                                                                                                                                                                                                                                                                                                                                                                                                                                                                                                                                                                                                                                                                                                                                                                          | N-(4-propoxybenzyl)butan-1-amine ( <b>3f</b> ) |             |      |            |
| <b>Lit. Ref.</b>                                                                                                                                                                                                                                                                                                                                                                                                                                                                                                                                                                                                                                                                                                                                                                                                                                                                                           |                                                |             |      |            |
| <p style="text-align: center;"><b>1f</b> + <b>2a</b> <math>\xrightarrow[\text{CH}_3\text{CN:H}_2\text{O (az.) 1M, 300mA, r.t., 3F/mol}]{\text{C(-) - Al(+), Et}_4\text{NBr 1 eq}}</math> <b>3f</b><br/> <b>MW: 221.34</b></p>                                                                                                                                                                                                                                                                                                                                                                                                                                                                                                                                                                                                                                                                              |                                                |             |      |            |
| <b>Method:</b>                                                                                                                                                                                                                                                                                                                                                                                                                                                                                                                                                                                                                                                                                                                                                                                                                                                                                             |                                                |             |      |            |
| <p>Prepared according to general procedure A: in a 8mL vial equipped with a magnetic stirrer and a two electrodes system (aluminium anode and graphite cathode) tetraethylammonium bromide (627.45 mg, 3 mmol), 4-propoxybenzaldehyde <b>1f</b> (492.60 mg, 3 mmol), butylamine <b>2a</b> (219.42 mg, 3 mmol) and 3 mL of azeotropic mixture of acetonitrile : water (84% w/w acetonitrile) were consecutively added and the resulting mixture was electrolyzed in CCE at 300 mA under stirring at room temperature until 3 F/mol of current were passed (ca. 50 minutes). After reaction completion the mixture was concentrated under reduced pressure. The residue was diluted with 10 mL of ethyl acetate, then it was filtered on cotton using compressed air to speed up the process and concentrated under reduced pressure, giving the product <b>3f</b> as a yellow oil (504.7mg, 76% yield).</p> |                                                |             |      |            |
| <b>Elemental analysis:</b> Calc: C: 75.97; H: 10.47; N: 6.33; Found: C: 75.97; H: 10.48; N: 6.32                                                                                                                                                                                                                                                                                                                                                                                                                                                                                                                                                                                                                                                                                                                                                                                                           |                                                |             |      |            |
| <b>Mol. Formula</b>                                                                                                                                                                                                                                                                                                                                                                                                                                                                                                                                                                                                                                                                                                                                                                                                                                                                                        | C <sub>14</sub> H <sub>23</sub> NO             | <b>m.p.</b> | oil  |            |
| <b><sup>1</sup>H NMR (400 MHz, CDCl<sub>3</sub>)</b>                                                                                                                                                                                                                                                                                                                                                                                                                                                                                                                                                                                                                                                                                                                                                                                                                                                       | $\delta$ value:                                | No. H       | Mult | J value/Hz |
|                                                                                                                                                                                                                                                                                                                                                                                                                                                                                                                                                                                                                                                                                                                                                                                                                                                                                                            | 7.23                                           | 2           | d    | 8.1        |
|                                                                                                                                                                                                                                                                                                                                                                                                                                                                                                                                                                                                                                                                                                                                                                                                                                                                                                            | 6.87                                           | 2           | d    | 8.1        |
|                                                                                                                                                                                                                                                                                                                                                                                                                                                                                                                                                                                                                                                                                                                                                                                                                                                                                                            | 3.92                                           | 2           | t    | 6.5        |
|                                                                                                                                                                                                                                                                                                                                                                                                                                                                                                                                                                                                                                                                                                                                                                                                                                                                                                            | 3.72                                           | 2           | s    |            |
|                                                                                                                                                                                                                                                                                                                                                                                                                                                                                                                                                                                                                                                                                                                                                                                                                                                                                                            | 2.62                                           | 2           | t    | 7.2        |
|                                                                                                                                                                                                                                                                                                                                                                                                                                                                                                                                                                                                                                                                                                                                                                                                                                                                                                            | 1.82                                           | 2           | h    | 7.2        |
|                                                                                                                                                                                                                                                                                                                                                                                                                                                                                                                                                                                                                                                                                                                                                                                                                                                                                                            | 1.50                                           | 2           | p    | 7.3        |
|                                                                                                                                                                                                                                                                                                                                                                                                                                                                                                                                                                                                                                                                                                                                                                                                                                                                                                            | 1.36                                           | 2           | h    | 7.3        |
|                                                                                                                                                                                                                                                                                                                                                                                                                                                                                                                                                                                                                                                                                                                                                                                                                                                                                                            | 1.05                                           | 3           | t    | 7.4        |
| 0.93                                                                                                                                                                                                                                                                                                                                                                                                                                                                                                                                                                                                                                                                                                                                                                                                                                                                                                       | 3                                              | t           | 7.3  |            |
| <b><sup>13</sup>C NMR (100.6 Hz, CDCl<sub>3</sub>)</b> $\delta$ : 158.2, 132.4, 129.3, 114.4, 69.5, 53.5, 49.1, 32.2, 22.6, 20.5, 14.0, 10.5.                                                                                                                                                                                                                                                                                                                                                                                                                                                                                                                                                                                                                                                                                                                                                              |                                                |             |      |            |
| <b>GC-EIMS (m/z, %):</b> 221(8), 178(17), 149(100), 121(35).                                                                                                                                                                                                                                                                                                                                                                                                                                                                                                                                                                                                                                                                                                                                                                                                                                               |                                                |             |      |            |

|                                                                                                                                                                                                                                                                                                                                                                                                                                                                                                                                                                                                                                                                                                                                                                                                                                                                                                           |                                                                                                   |             |      |            |
|-----------------------------------------------------------------------------------------------------------------------------------------------------------------------------------------------------------------------------------------------------------------------------------------------------------------------------------------------------------------------------------------------------------------------------------------------------------------------------------------------------------------------------------------------------------------------------------------------------------------------------------------------------------------------------------------------------------------------------------------------------------------------------------------------------------------------------------------------------------------------------------------------------------|---------------------------------------------------------------------------------------------------|-------------|------|------------|
| <b>Chem. Name</b>                                                                                                                                                                                                                                                                                                                                                                                                                                                                                                                                                                                                                                                                                                                                                                                                                                                                                         | N-(2-methylbenzyl)butan-1-amine ( <b>3g</b> )                                                     |             |      |            |
| <b>Lit. Ref.</b>                                                                                                                                                                                                                                                                                                                                                                                                                                                                                                                                                                                                                                                                                                                                                                                                                                                                                          | J. L. Jeffrey, E. S. Bartlett and R. Sarpong, <i>Angew. Chem.</i> , 2013, <b>125</b> , 2250–2253. |             |      |            |
| <p style="text-align: center;"> <math>\text{1g} + \text{2a} \xrightarrow[\text{CH}_3\text{CN:H}_2\text{O (az.) 1M, 300mA, r.t., 3F/mol}]{\text{C(-) - Al(+), Et}_4\text{NBr 1 eq}}</math> </p> <p style="text-align: center;"><b>3g</b><br/>MW: 177.29</p>                                                                                                                                                                                                                                                                                                                                                                                                                                                                                                                                                                                                                                                |                                                                                                   |             |      |            |
| <b>Method:</b>                                                                                                                                                                                                                                                                                                                                                                                                                                                                                                                                                                                                                                                                                                                                                                                                                                                                                            |                                                                                                   |             |      |            |
| <p>Prepared according to general procedure A: in a 8mL vial equipped with a magnetic stirrer and a two electrodes system (aluminium anode and graphite cathode) tetraethylammonium bromide (627.45 mg, 3 mmol), 2-methylbenzaldehyde <b>1g</b> (360.45 mg, 3 mmol), butylamine <b>2a</b> (219.42 mg, 3 mmol) and 3 mL of azeotropic mixture of acetonitrile : water (84% w/w acetonitrile) were consecutively added and the resulting mixture was electrolyzed in CCE at 300 mA under stirring at room temperature until 3 F/mol of current were passed (ca. 50 minutes). After reaction completion the mixture was concentrated under reduced pressure. The residue was diluted with 10 mL of ethyl acetate, then it was filtered on cotton using compressed air to speed up the process and concentrated under reduced pressure, giving the product <b>3g</b> as a yellow oil (388.3mg, 73% yield).</p> |                                                                                                   |             |      |            |
| <b>Elemental analysis:</b> Calc: C: 81.30; H: 10.80; N: 7.90; Found: C: 81.29; H: 10.81; N: 7.90                                                                                                                                                                                                                                                                                                                                                                                                                                                                                                                                                                                                                                                                                                                                                                                                          |                                                                                                   |             |      |            |
| <b>Mol. Formula</b>                                                                                                                                                                                                                                                                                                                                                                                                                                                                                                                                                                                                                                                                                                                                                                                                                                                                                       | C <sub>12</sub> H <sub>19</sub> N                                                                 | <b>m.p.</b> | oil  |            |
| <b><sup>1</sup>H NMR (400 MHz, CDCl<sub>3</sub>)</b>                                                                                                                                                                                                                                                                                                                                                                                                                                                                                                                                                                                                                                                                                                                                                                                                                                                      | $\delta$ value:                                                                                   | No. H       | Mult | J value/Hz |
|                                                                                                                                                                                                                                                                                                                                                                                                                                                                                                                                                                                                                                                                                                                                                                                                                                                                                                           | 7.30                                                                                              | 1           | m    |            |
|                                                                                                                                                                                                                                                                                                                                                                                                                                                                                                                                                                                                                                                                                                                                                                                                                                                                                                           | 7.17                                                                                              | 3           | m    |            |
|                                                                                                                                                                                                                                                                                                                                                                                                                                                                                                                                                                                                                                                                                                                                                                                                                                                                                                           | 3.77                                                                                              | 2           | s    |            |
|                                                                                                                                                                                                                                                                                                                                                                                                                                                                                                                                                                                                                                                                                                                                                                                                                                                                                                           | 2.68                                                                                              | 2           | t    | 7.1        |
|                                                                                                                                                                                                                                                                                                                                                                                                                                                                                                                                                                                                                                                                                                                                                                                                                                                                                                           | 2.36                                                                                              | 3           | s    |            |
|                                                                                                                                                                                                                                                                                                                                                                                                                                                                                                                                                                                                                                                                                                                                                                                                                                                                                                           | 1.53                                                                                              | 2           | p    | 7.1        |
|                                                                                                                                                                                                                                                                                                                                                                                                                                                                                                                                                                                                                                                                                                                                                                                                                                                                                                           | 1.38                                                                                              | 2           | h    | 7.3        |
| 0.94                                                                                                                                                                                                                                                                                                                                                                                                                                                                                                                                                                                                                                                                                                                                                                                                                                                                                                      | 3                                                                                                 | t           | 7.3  |            |
| <b><sup>13</sup>C NMR (100.6 Hz, CDCl<sub>3</sub>)</b> $\delta$ : 138.6, 136.2, 130.2, 128.3, 126.9, 125.9, 51.7, 49.6, 32.3, 20.6, 19.0, 14.1.                                                                                                                                                                                                                                                                                                                                                                                                                                                                                                                                                                                                                                                                                                                                                           |                                                                                                   |             |      |            |
| <b>GC-EIMS (m/z, %):</b> 177(14), 134(26), 105(100), 104(12).                                                                                                                                                                                                                                                                                                                                                                                                                                                                                                                                                                                                                                                                                                                                                                                                                                             |                                                                                                   |             |      |            |

|                                                                                                                                                                                                                                                                                                                                                                                                                                                                                                                                                                                                                                                                                                                                                                                                                                                                                                       |                                                                                                        |             |      |            |
|-------------------------------------------------------------------------------------------------------------------------------------------------------------------------------------------------------------------------------------------------------------------------------------------------------------------------------------------------------------------------------------------------------------------------------------------------------------------------------------------------------------------------------------------------------------------------------------------------------------------------------------------------------------------------------------------------------------------------------------------------------------------------------------------------------------------------------------------------------------------------------------------------------|--------------------------------------------------------------------------------------------------------|-------------|------|------------|
| <b>Chem. Name</b>                                                                                                                                                                                                                                                                                                                                                                                                                                                                                                                                                                                                                                                                                                                                                                                                                                                                                     | N-(Naphthalen-2-ylmethyl)butan-1-amine ( <b>3h</b> )                                                   |             |      |            |
| <b>Lit. Ref.</b>                                                                                                                                                                                                                                                                                                                                                                                                                                                                                                                                                                                                                                                                                                                                                                                                                                                                                      | L.-Y. Fu, J. Ying, X. Qi, J.-B. Peng and X.-F. Wu, <i>J. Org. Chem.</i> , 2019, <b>84</b> , 1421–1429. |             |      |            |
| <p style="text-align: center;"> <math>\text{1h} + \text{n-BuNH}_2 \xrightarrow[\text{CH}_3\text{CN:H}_2\text{O (az.) 1M, 300mA, r.t., 2.75F/mol}]{\text{C(-) - Al(+), Et}_4\text{NBr 1 eq}} \text{3h}</math> </p> <p style="text-align: center;"><b>3h</b><br/>MW: 213.32</p>                                                                                                                                                                                                                                                                                                                                                                                                                                                                                                                                                                                                                         |                                                                                                        |             |      |            |
| <b>Method:</b>                                                                                                                                                                                                                                                                                                                                                                                                                                                                                                                                                                                                                                                                                                                                                                                                                                                                                        |                                                                                                        |             |      |            |
| <p>Prepared according to general procedure A: in a 8mL vial equipped with a magnetic stirrer and a two electrodes system (aluminium anode and graphite cathode) tetraethylammonium bromide (627.45 mg, 3 mmol), 2-naphthaldehyde <b>1h</b> (468.54 mg, 3 mmol), butylamine <b>2a</b> (219.42 mg, 3 mmol) and 3 mL of azeotropic mixture of acetonitrile : water (84% w/w acetonitrile) were consecutively added and the resulting mixture was electrolyzed in CCE at 300 mA under stirring at room temperature until 3 F/mol of current were passed (ca. 45 minutes). After reaction completion the mixture was concentrated under reduced pressure. The residue was diluted with 10 mL of ethyl acetate, then it was filtered on cotton using compressed air to speed up the process and concentrated under reduced pressure, giving the product <b>3h</b> as a yellow oil (492.8mg, 77% yield).</p> |                                                                                                        |             |      |            |
| <b>Elemental analysis:</b> Calc: C: 84.46; H: 8.98; N: 6.57; Found: C: 84.45; H: 8.97; Br: 35.32; N: 6.58                                                                                                                                                                                                                                                                                                                                                                                                                                                                                                                                                                                                                                                                                                                                                                                             |                                                                                                        |             |      |            |
| <b>Mol. Formula</b>                                                                                                                                                                                                                                                                                                                                                                                                                                                                                                                                                                                                                                                                                                                                                                                                                                                                                   | C <sub>15</sub> H <sub>19</sub> N                                                                      | <b>m.p.</b> | oil  |            |
| <b><sup>1</sup>H NMR (400 MHz, CDCl<sub>3</sub>)</b>                                                                                                                                                                                                                                                                                                                                                                                                                                                                                                                                                                                                                                                                                                                                                                                                                                                  | $\delta$ value:                                                                                        | No. H       | Mult | J value/Hz |
|                                                                                                                                                                                                                                                                                                                                                                                                                                                                                                                                                                                                                                                                                                                                                                                                                                                                                                       | 7.84                                                                                                   | 3           | m    |            |
|                                                                                                                                                                                                                                                                                                                                                                                                                                                                                                                                                                                                                                                                                                                                                                                                                                                                                                       | 7.78                                                                                                   | 1           | s    |            |
|                                                                                                                                                                                                                                                                                                                                                                                                                                                                                                                                                                                                                                                                                                                                                                                                                                                                                                       | 7.48                                                                                                   | 3           | m    |            |
|                                                                                                                                                                                                                                                                                                                                                                                                                                                                                                                                                                                                                                                                                                                                                                                                                                                                                                       | 3.96                                                                                                   | 2           | s    |            |
|                                                                                                                                                                                                                                                                                                                                                                                                                                                                                                                                                                                                                                                                                                                                                                                                                                                                                                       | 2.68                                                                                                   | 2           | t    | 7.2        |
|                                                                                                                                                                                                                                                                                                                                                                                                                                                                                                                                                                                                                                                                                                                                                                                                                                                                                                       | 1.55                                                                                                   | 2           | p    | 7.2        |
|                                                                                                                                                                                                                                                                                                                                                                                                                                                                                                                                                                                                                                                                                                                                                                                                                                                                                                       | 1.40                                                                                                   | 2           | h    | 7.3        |
|                                                                                                                                                                                                                                                                                                                                                                                                                                                                                                                                                                                                                                                                                                                                                                                                                                                                                                       | 0.96                                                                                                   | 3           | t    | 7.3        |
| <b><sup>13</sup>C NMR (100.6 Hz, CDCl<sub>3</sub>)</b> $\delta$ : 138.2, 133.5, 132.7, 128.1, 127.8, 127.7, 126.7, 126.4, 126.0, 125.5, 54.2, 49.2, 32.3, 20.6, 14.1.                                                                                                                                                                                                                                                                                                                                                                                                                                                                                                                                                                                                                                                                                                                                 |                                                                                                        |             |      |            |
| <b>GC-EIMS (m/z, %):</b> 213(19), 170(79), 141(100).                                                                                                                                                                                                                                                                                                                                                                                                                                                                                                                                                                                                                                                                                                                                                                                                                                                  |                                                                                                        |             |      |            |

|                                                                                                                                                                                                                                                                                                                                                                                                                                                                                                                                                                                                                                                                                                                                                                                                                                                                                                              |                                                                                                             |             |      |            |
|--------------------------------------------------------------------------------------------------------------------------------------------------------------------------------------------------------------------------------------------------------------------------------------------------------------------------------------------------------------------------------------------------------------------------------------------------------------------------------------------------------------------------------------------------------------------------------------------------------------------------------------------------------------------------------------------------------------------------------------------------------------------------------------------------------------------------------------------------------------------------------------------------------------|-------------------------------------------------------------------------------------------------------------|-------------|------|------------|
| <b>Chem. Name</b>                                                                                                                                                                                                                                                                                                                                                                                                                                                                                                                                                                                                                                                                                                                                                                                                                                                                                            | N-(4-chlorobenzyl)hexan-1-amine ( <b>3i</b> )                                                               |             |      |            |
| <b>Lit. Ref.</b>                                                                                                                                                                                                                                                                                                                                                                                                                                                                                                                                                                                                                                                                                                                                                                                                                                                                                             | C. Guyon, E. Da Silva, R. Lafon, E. Métay and M. Lemaire, <i>RSC Advances</i> , 2015, <b>5</b> , 2292–2298. |             |      |            |
| <p style="text-align: center;"> <math>\text{Cl-C}_6\text{H}_4\text{-CHO}</math> (<b>1c</b>) + <math>\text{n-HexNH}_2</math> (<b>2b</b>) <math>\xrightarrow[\text{CH}_3\text{CN:H}_2\text{O (az.) 1M, 300 mA, r.t., 2.75F/mol}]{\text{C(-) - Al(+), Et}_4\text{NBr 1 eq}}</math> <math>\text{Cl-C}_6\text{H}_4\text{-CH}_2\text{-NH-(CH}_2\text{)}_5\text{CH}_3</math> (<b>3i</b>)<br/> <b>MW: 225.76</b> </p>                                                                                                                                                                                                                                                                                                                                                                                                                                                                                                |                                                                                                             |             |      |            |
| <b>Method:</b>                                                                                                                                                                                                                                                                                                                                                                                                                                                                                                                                                                                                                                                                                                                                                                                                                                                                                               |                                                                                                             |             |      |            |
| <p>Prepared according to general procedure A: in a 8mL vial equipped with a magnetic stirrer and a two electrodes system (aluminium anode and graphite cathode) tetraethylammonium bromide (627.45 mg, 3 mmol), 4-chlorobenzaldehyde <b>1c</b> (421.71 mg, 3 mmol), hexylamine <b>2b</b> (303.57 mg, 3 mmol) and 3 mL of azeotropic mixture of acetonitrile : water (84% w/w acetonitrile) were consecutively added and the resulting mixture was electrolyzed in CCE at 300 mA under stirring at room temperature until 2.75 F/mol of current were passed (ca. 45 minutes). After reaction completion the mixture was concentrated under reduced pressure. The residue was diluted with 10 mL of ethyl acetate, then it was filtered on cotton using compressed air to speed up the process and concentrated under reduced pressure, giving the product <b>3i</b> as a yellow oil (548.6mg, 81% yield).</p> |                                                                                                             |             |      |            |
| <b>Elemental analysis:</b> Calc: C: 69.16; H: 8.93; Cl: 15.70; N: 6.20; Found: C: 69.16; H: 8.94; Cl: 15.71; N: 6.18                                                                                                                                                                                                                                                                                                                                                                                                                                                                                                                                                                                                                                                                                                                                                                                         |                                                                                                             |             |      |            |
| <b>Mol. Formula</b>                                                                                                                                                                                                                                                                                                                                                                                                                                                                                                                                                                                                                                                                                                                                                                                                                                                                                          | C <sub>13</sub> H <sub>20</sub> ClN                                                                         | <b>m.p.</b> | oil  |            |
| <b><sup>1</sup>H NMR (400 MHz, DMSO-d<sub>6</sub>)</b>                                                                                                                                                                                                                                                                                                                                                                                                                                                                                                                                                                                                                                                                                                                                                                                                                                                       | $\delta$ value:                                                                                             | No. H       | Mult | J value/Hz |
|                                                                                                                                                                                                                                                                                                                                                                                                                                                                                                                                                                                                                                                                                                                                                                                                                                                                                                              | 7.33                                                                                                        | 4           | m    |            |
|                                                                                                                                                                                                                                                                                                                                                                                                                                                                                                                                                                                                                                                                                                                                                                                                                                                                                                              | 3.65                                                                                                        | 2           | s    |            |
|                                                                                                                                                                                                                                                                                                                                                                                                                                                                                                                                                                                                                                                                                                                                                                                                                                                                                                              | 2.44                                                                                                        | 2           | t    | 7.1        |
|                                                                                                                                                                                                                                                                                                                                                                                                                                                                                                                                                                                                                                                                                                                                                                                                                                                                                                              | 1.40                                                                                                        | 2           | p    | 6.8        |
|                                                                                                                                                                                                                                                                                                                                                                                                                                                                                                                                                                                                                                                                                                                                                                                                                                                                                                              | 1.25                                                                                                        | 6           | m    |            |
|                                                                                                                                                                                                                                                                                                                                                                                                                                                                                                                                                                                                                                                                                                                                                                                                                                                                                                              | 0.85                                                                                                        | 3           | t    | 6.8        |
| <b><sup>13</sup>C NMR (100.6 Hz, DMSO-d<sub>6</sub>)</b> $\delta$ : 140.7, 131.3, 130.1, 128.4, 52.7, 49.1, 31.8, 30.0, 27.0, 22.6, 14.4.                                                                                                                                                                                                                                                                                                                                                                                                                                                                                                                                                                                                                                                                                                                                                                    |                                                                                                             |             |      |            |
| <b>GC-EIMS (m/z, %):</b> 225(5), 156(23), 154(73), 127(34), 125(100).                                                                                                                                                                                                                                                                                                                                                                                                                                                                                                                                                                                                                                                                                                                                                                                                                                        |                                                                                                             |             |      |            |

|                                                                                                                                                                                                                                                                                                                                                                                                                       |                                                                                                                                                                                                                                                                                                                                                                                                                                                                                                                                                                                                                                                                                                                                                                                                                                                                                                               |             |      |            |
|-----------------------------------------------------------------------------------------------------------------------------------------------------------------------------------------------------------------------------------------------------------------------------------------------------------------------------------------------------------------------------------------------------------------------|---------------------------------------------------------------------------------------------------------------------------------------------------------------------------------------------------------------------------------------------------------------------------------------------------------------------------------------------------------------------------------------------------------------------------------------------------------------------------------------------------------------------------------------------------------------------------------------------------------------------------------------------------------------------------------------------------------------------------------------------------------------------------------------------------------------------------------------------------------------------------------------------------------------|-------------|------|------------|
| <b>Chem. Name</b>                                                                                                                                                                                                                                                                                                                                                                                                     | N-(4-chlorobenzyl)pentan-1-amine ( <b>3j</b> )                                                                                                                                                                                                                                                                                                                                                                                                                                                                                                                                                                                                                                                                                                                                                                                                                                                                |             |      |            |
| <b>Lit. Ref.</b>                                                                                                                                                                                                                                                                                                                                                                                                      |                                                                                                                                                                                                                                                                                                                                                                                                                                                                                                                                                                                                                                                                                                                                                                                                                                                                                                               |             |      |            |
| <p style="text-align: center;"> <math>\text{Cl-C}_6\text{H}_4\text{-CHO}</math> (<b>1c</b>) + <math>\text{n-PentNH}_2</math> (<b>2c</b>) <math>\xrightarrow[\text{300 mA, r.t., 2.75F/mol}]{\text{C(-) - Al(+), Et}_4\text{NBr 1 eq, CH}_3\text{CN:H}_2\text{O (az.) 1M}}</math> <math>\text{Cl-C}_6\text{H}_4\text{-CH}_2\text{-NH-Pent}</math> (<b>3j</b>) </p> <p style="text-align: right;"><b>MW: 211.73</b></p> |                                                                                                                                                                                                                                                                                                                                                                                                                                                                                                                                                                                                                                                                                                                                                                                                                                                                                                               |             |      |            |
| <b>Method:</b>                                                                                                                                                                                                                                                                                                                                                                                                        | <p>Prepared according to general procedure A: in a 8mL vial equipped with a magnetic stirrer and a two electrodes system (aluminium anode and graphite cathode) tetraethylammonium bromide (627.45 mg, 3 mmol), 4-chlorobenzaldehyde <b>1c</b> (421.71 mg, 3 mmol), pentylamine <b>2c</b> (261.48 mg, 3 mmol) and 3 mL of azeotropic mixture of acetonitrile : water (84% w/w acetonitrile) were consecutively added and the resulting mixture was electrolyzed in CCE at 300 mA under stirring at room temperature until 2.75 F/mol of current were passed (ca. 45 minutes). After reaction completion the mixture was concentrated under reduced pressure. The residue was diluted with 10 mL of ethyl acetate, then it was filtered on cotton using compressed air to speed up the process and concentrated under reduced pressure, giving the product <b>3j</b> as a yellow oil (501.8mg, 79% yield).</p> |             |      |            |
| <b>Elemental analysis:</b>                                                                                                                                                                                                                                                                                                                                                                                            | <p>Calc: C: 68.07; H: 8.57; Cl: 16.74; N: 6.62; Found: C: 68.05; H: 8.58; Cl: 16.74; N: 6.63</p>                                                                                                                                                                                                                                                                                                                                                                                                                                                                                                                                                                                                                                                                                                                                                                                                              |             |      |            |
| <b>Mol. Formula</b>                                                                                                                                                                                                                                                                                                                                                                                                   | C <sub>12</sub> H <sub>18</sub> ClN                                                                                                                                                                                                                                                                                                                                                                                                                                                                                                                                                                                                                                                                                                                                                                                                                                                                           | <b>m.p.</b> | oil  |            |
| <b><sup>1</sup>H NMR (400 MHz, CDCl<sub>3</sub>)</b>                                                                                                                                                                                                                                                                                                                                                                  | $\delta$ value:                                                                                                                                                                                                                                                                                                                                                                                                                                                                                                                                                                                                                                                                                                                                                                                                                                                                                               | No. H       | Mult | J value/Hz |
|                                                                                                                                                                                                                                                                                                                                                                                                                       | 7.33                                                                                                                                                                                                                                                                                                                                                                                                                                                                                                                                                                                                                                                                                                                                                                                                                                                                                                          | 4           | m    |            |
|                                                                                                                                                                                                                                                                                                                                                                                                                       | 3.65                                                                                                                                                                                                                                                                                                                                                                                                                                                                                                                                                                                                                                                                                                                                                                                                                                                                                                          | 2           | s    |            |
|                                                                                                                                                                                                                                                                                                                                                                                                                       | 2.44                                                                                                                                                                                                                                                                                                                                                                                                                                                                                                                                                                                                                                                                                                                                                                                                                                                                                                          | 2           | t    | 7.1        |
|                                                                                                                                                                                                                                                                                                                                                                                                                       | 1.41                                                                                                                                                                                                                                                                                                                                                                                                                                                                                                                                                                                                                                                                                                                                                                                                                                                                                                          | 2           | p    | 7.2        |
|                                                                                                                                                                                                                                                                                                                                                                                                                       | 1.25                                                                                                                                                                                                                                                                                                                                                                                                                                                                                                                                                                                                                                                                                                                                                                                                                                                                                                          | 4           | m    |            |
|                                                                                                                                                                                                                                                                                                                                                                                                                       | 0.84                                                                                                                                                                                                                                                                                                                                                                                                                                                                                                                                                                                                                                                                                                                                                                                                                                                                                                          | 3           | m    |            |
| <b><sup>13</sup>C NMR (100.6 Hz, CDCl<sub>3</sub>)</b>                                                                                                                                                                                                                                                                                                                                                                | $\delta$ : 140.7, 131.4, 130.0, 128.4, 52.7, 49.1, 29.7, 29.6, 22.6, 14.4.                                                                                                                                                                                                                                                                                                                                                                                                                                                                                                                                                                                                                                                                                                                                                                                                                                    |             |      |            |
| <b>GC-EIMS (m/z, %):</b>                                                                                                                                                                                                                                                                                                                                                                                              | 211(4), 156(19), 154(63), 127(28), 125(100).                                                                                                                                                                                                                                                                                                                                                                                                                                                                                                                                                                                                                                                                                                                                                                                                                                                                  |             |      |            |



|                                                                                                                                                                                                                                                                                      |                                                                                                                                                                                                                                                                                                                                                                                                                                                                                                                                                                                                                                                                                                                                                                                                                                                                                                              |             |      |            |
|--------------------------------------------------------------------------------------------------------------------------------------------------------------------------------------------------------------------------------------------------------------------------------------|--------------------------------------------------------------------------------------------------------------------------------------------------------------------------------------------------------------------------------------------------------------------------------------------------------------------------------------------------------------------------------------------------------------------------------------------------------------------------------------------------------------------------------------------------------------------------------------------------------------------------------------------------------------------------------------------------------------------------------------------------------------------------------------------------------------------------------------------------------------------------------------------------------------|-------------|------|------------|
| <b>Chem. Name</b>                                                                                                                                                                                                                                                                    | N-(4-chlorobenzyl)octan-1-amine ( <b>3k</b> )                                                                                                                                                                                                                                                                                                                                                                                                                                                                                                                                                                                                                                                                                                                                                                                                                                                                |             |      |            |
| <b>Lit. Ref.</b>                                                                                                                                                                                                                                                                     |                                                                                                                                                                                                                                                                                                                                                                                                                                                                                                                                                                                                                                                                                                                                                                                                                                                                                                              |             |      |            |
| <p style="text-align: center;"> <math>\text{C}(-) - \text{Al}(+)</math><br/> <math>\text{Et}_4\text{NBr}</math> 1 eq<br/> <math>\text{CH}_3\text{CN}:\text{H}_2\text{O}</math> (az.) 1M<br/> 300 mA, r.t., 2.75F/mol </p> <p style="text-align: right;"><b>3k</b><br/>MW: 253.81</p> |                                                                                                                                                                                                                                                                                                                                                                                                                                                                                                                                                                                                                                                                                                                                                                                                                                                                                                              |             |      |            |
| <b>Method:</b>                                                                                                                                                                                                                                                                       | <p>Prepared according to general procedure A: in a 8mL vial equipped with a magnetic stirrer and a two electrodes system (aluminium anode and graphite cathode) tetraethylammonium bromide (627.45 mg, 3 mmol), 4-chlorobenzaldehyde <b>1c</b> (421.71 mg, 3 mmol), octylamine <b>2a</b> (387.72 mg, 3 mmol) and 3 mL of azeotropic mixture of acetonitrile : water (84% w/w acetonitrile) were consecutively added and the resulting mixture was electrolyzed in CCE at 300 mA under stirring at room temperature until 2.75 F/mol of current were passed (ca. 45 minutes). After reaction completion the mixture was concentrated under reduced pressure. The residue was diluted with 10 mL of ethyl acetate, then it was filtered on cotton using compressed air to speed up the process and concentrated under reduced pressure, giving the product <b>3k</b> as a yellow oil (624.4mg, 82% yield).</p> |             |      |            |
| <b>Elemental analysis:</b>                                                                                                                                                                                                                                                           | Calc: C: 70.98; H: 9.53; Cl: 13.97; N: 5.52; Found: C: 70.97; H: 9.53; Cl: 13.98; N: 5.53                                                                                                                                                                                                                                                                                                                                                                                                                                                                                                                                                                                                                                                                                                                                                                                                                    |             |      |            |
| <b>Mol. Formula</b>                                                                                                                                                                                                                                                                  | C <sub>15</sub> H <sub>24</sub> ClN                                                                                                                                                                                                                                                                                                                                                                                                                                                                                                                                                                                                                                                                                                                                                                                                                                                                          | <b>m.p.</b> | oil  |            |
| <b><sup>1</sup>H NMR (400 MHz, CDCl<sub>3</sub>)</b>                                                                                                                                                                                                                                 | $\delta$ value:                                                                                                                                                                                                                                                                                                                                                                                                                                                                                                                                                                                                                                                                                                                                                                                                                                                                                              | No. H       | Mult | J value/Hz |
|                                                                                                                                                                                                                                                                                      | 7.29                                                                                                                                                                                                                                                                                                                                                                                                                                                                                                                                                                                                                                                                                                                                                                                                                                                                                                         | 4           | m    |            |
|                                                                                                                                                                                                                                                                                      | 3.76                                                                                                                                                                                                                                                                                                                                                                                                                                                                                                                                                                                                                                                                                                                                                                                                                                                                                                         | 2           | s    |            |
|                                                                                                                                                                                                                                                                                      | 2.61                                                                                                                                                                                                                                                                                                                                                                                                                                                                                                                                                                                                                                                                                                                                                                                                                                                                                                         | 2           | t    | 7.2        |
|                                                                                                                                                                                                                                                                                      | 1.51                                                                                                                                                                                                                                                                                                                                                                                                                                                                                                                                                                                                                                                                                                                                                                                                                                                                                                         | 2           | p    | 7.1        |
|                                                                                                                                                                                                                                                                                      | 1.29                                                                                                                                                                                                                                                                                                                                                                                                                                                                                                                                                                                                                                                                                                                                                                                                                                                                                                         | 10          | m    |            |
|                                                                                                                                                                                                                                                                                      | 0.90                                                                                                                                                                                                                                                                                                                                                                                                                                                                                                                                                                                                                                                                                                                                                                                                                                                                                                         | 3           | t    | 6.6        |
| <b><sup>13</sup>C NMR (100.6 Hz, CDCl<sub>3</sub>)</b>                                                                                                                                                                                                                               | $\delta$ : 139.1, 132.5, 129.4, 128.4, 53.3, 49.5, 31.8, 30.1, 29.5, 29.3, 27.3, 22.7, 14.1.                                                                                                                                                                                                                                                                                                                                                                                                                                                                                                                                                                                                                                                                                                                                                                                                                 |             |      |            |
| <b>GC-EIMS (m/z, %):</b>                                                                                                                                                                                                                                                             | 253(7), 156(21), 154(64), 127(26), 125(100).                                                                                                                                                                                                                                                                                                                                                                                                                                                                                                                                                                                                                                                                                                                                                                                                                                                                 |             |      |            |



|                                                                                                                                                                                                                                                                                                                                                                                                                                                                                                                                                                                                                                                                                                                                                                                                                                                                   |                                                                                      |             |      |            |
|-------------------------------------------------------------------------------------------------------------------------------------------------------------------------------------------------------------------------------------------------------------------------------------------------------------------------------------------------------------------------------------------------------------------------------------------------------------------------------------------------------------------------------------------------------------------------------------------------------------------------------------------------------------------------------------------------------------------------------------------------------------------------------------------------------------------------------------------------------------------|--------------------------------------------------------------------------------------|-------------|------|------------|
| <b>Chem. Name</b>                                                                                                                                                                                                                                                                                                                                                                                                                                                                                                                                                                                                                                                                                                                                                                                                                                                 | N-(4-chlorobenzyl)propan-2-amine ( <b>3m</b> )                                       |             |      |            |
| <b>Lit. Ref.</b>                                                                                                                                                                                                                                                                                                                                                                                                                                                                                                                                                                                                                                                                                                                                                                                                                                                  | D. Kim, B. Kang and S. H. Hong, <i>Org. Chem. Front.</i> , 2016, <b>3</b> , 475–479. |             |      |            |
| <p style="text-align: center;"> <chem>Clc1ccc(C=O)cc1</chem> (<b>1c</b>) + <chem>CC(C)N</chem> (<b>2f</b>) <math>\xrightarrow[\text{CH}_3\text{CN:H}_2\text{O (az.) 1M, 300mA, r.t., 2.75F/mol}]{\text{C(-) - Al(+), Et}_4\text{NBr 1 eq}}</math> <chem>Clc1ccc(CCN(C)C)cc1</chem> (<b>3m</b>)<br/> <b>MW: 183.68</b> </p>                                                                                                                                                                                                                                                                                                                                                                                                                                                                                                                                        |                                                                                      |             |      |            |
| <b>Method:</b>                                                                                                                                                                                                                                                                                                                                                                                                                                                                                                                                                                                                                                                                                                                                                                                                                                                    |                                                                                      |             |      |            |
| <p>Prepared according to general procedure A: in a 8mL vial equipped with a magnetic stirrer and a two electrodes system (aluminium anode and graphite cathode) tetraethylammonium bromide (627.45 mg, 3 mmol), 4-chlorobenzaldehyde <b>1c</b> (421.71 mg, 3 mmol), isopropylamine <b>2f</b> (177.33 mg, 3 mmol) and 3 mL of azeotropic mixture of acetonitrile : water (84% w/w acetonitrile) were consecutively added and the resulting mixture was electrolyzed in CCE at 300 mA under stirring at room temperature until 2.75 F/mol of current were passed (ca. 45 minutes). After reaction completion the mixture was concentrated under reduced pressure. The residue was diluted in 10 mL of ethyl acetate, then it was filtered on cotton and concentrated under reduced pressure, giving the product <b>3m</b> as a yellow oil (462.9mg, 84% yield).</p> |                                                                                      |             |      |            |
| <b>Elemental analysis:</b> Calc: C: 65.39; H: 7.68; Cl: 19.30; N: 7.63; Found: C: 65.40; H: 7.69; Cl: 19.32; N: 7.61                                                                                                                                                                                                                                                                                                                                                                                                                                                                                                                                                                                                                                                                                                                                              |                                                                                      |             |      |            |
| <b>Mol. Formula</b>                                                                                                                                                                                                                                                                                                                                                                                                                                                                                                                                                                                                                                                                                                                                                                                                                                               | C <sub>10</sub> H <sub>14</sub> ClN                                                  | <b>m.p.</b> | oil  |            |
| <b><sup>1</sup>H NMR (400 MHz, DMSO-d<sub>6</sub>)</b>                                                                                                                                                                                                                                                                                                                                                                                                                                                                                                                                                                                                                                                                                                                                                                                                            | δ value:                                                                             | No. H       | Mult | J value/Hz |
|                                                                                                                                                                                                                                                                                                                                                                                                                                                                                                                                                                                                                                                                                                                                                                                                                                                                   | 7.31                                                                                 | 4           | m    |            |
|                                                                                                                                                                                                                                                                                                                                                                                                                                                                                                                                                                                                                                                                                                                                                                                                                                                                   | 3.64                                                                                 | 2           | s    |            |
|                                                                                                                                                                                                                                                                                                                                                                                                                                                                                                                                                                                                                                                                                                                                                                                                                                                                   | 2.64                                                                                 | 1           | hept | 6.3        |
|                                                                                                                                                                                                                                                                                                                                                                                                                                                                                                                                                                                                                                                                                                                                                                                                                                                                   | 0.96                                                                                 | 6           | d    | 6.2        |
| <b><sup>13</sup>C NMR (100.6 Hz, DMSO-d<sub>6</sub>)</b> δ: 141.0, 131.3, 130.1, 128.4, 50.1, 47.7, 23.2.                                                                                                                                                                                                                                                                                                                                                                                                                                                                                                                                                                                                                                                                                                                                                         |                                                                                      |             |      |            |
| <b>GC-EIMS (m/z, %):</b> 183(8), 170(19), 168(65), 127(31), 125(100).                                                                                                                                                                                                                                                                                                                                                                                                                                                                                                                                                                                                                                                                                                                                                                                             |                                                                                      |             |      |            |

|                                                                                                                                                                                                                                                                                                                                  |                                                                                                                                                                                                                                                                                                                                                                                                                                                                                                                                                                                                                                                                                                                                                                                                                                                                    |             |      |            |
|----------------------------------------------------------------------------------------------------------------------------------------------------------------------------------------------------------------------------------------------------------------------------------------------------------------------------------|--------------------------------------------------------------------------------------------------------------------------------------------------------------------------------------------------------------------------------------------------------------------------------------------------------------------------------------------------------------------------------------------------------------------------------------------------------------------------------------------------------------------------------------------------------------------------------------------------------------------------------------------------------------------------------------------------------------------------------------------------------------------------------------------------------------------------------------------------------------------|-------------|------|------------|
| <b>Chem. Name</b>                                                                                                                                                                                                                                                                                                                | N-(4-chlorobenzyl)cyclohexan-1-amine ( <b>3n</b> )                                                                                                                                                                                                                                                                                                                                                                                                                                                                                                                                                                                                                                                                                                                                                                                                                 |             |      |            |
| <b>Lit. Ref.</b>                                                                                                                                                                                                                                                                                                                 | V. Ehmke, E. Winkler, D. W. Banner, W. Haap, W. B. Schweizer, M. Rottmann, M. Kaiser, C. Freymond, T. Schirmeister and F. Diederich, <i>ChemMedChem</i> , 2013, <b>8</b> , 967–975.                                                                                                                                                                                                                                                                                                                                                                                                                                                                                                                                                                                                                                                                                |             |      |            |
| <p style="text-align: center;"> <chem>Clc1ccc(C=O)cc1</chem> (<b>1c</b>) + <chem>Nc1ccccc1</chem> (<b>2g</b>) <math>\xrightarrow[\text{CH}_3\text{CN:H}_2\text{O (az.) 1M, 300mA, r.t., 2.75F/mol}]{\text{C(-) - Al(+), Et}_4\text{NBr 1 eq}}</math> <chem>Clc1ccc(CCN2CCCCC2)cc1</chem> (<b>3n</b>)<br/> <b>MW: 223.74</b> </p> |                                                                                                                                                                                                                                                                                                                                                                                                                                                                                                                                                                                                                                                                                                                                                                                                                                                                    |             |      |            |
| <b>Method:</b>                                                                                                                                                                                                                                                                                                                   | <p>Prepared according to general procedure A: in a 8mL vial equipped with a magnetic stirrer and a two electrodes system (aluminium anode and graphite cathode) tetraethylammonium bromide (627.45 mg, 3 mmol), 4-chlorobenzaldehyde <b>1c</b> (421.71 mg, 3 mmol), cyclohexylamine <b>2g</b> (297.54 mg, 3 mmol) and 3 mL of azeotropic mixture of acetonitrile : water (84% w/w acetonitrile) were consecutively added and the resulting mixture was electrolyzed in CCE at 300 mA under stirring at room temperature until 2.75 F/mol of current were passed (ca. 45 minutes). After reaction completion the mixture was concentrated under reduced pressure. The residue was diluted in 10 mL of ethyl acetate, then it was filtered on cotton and concentrated under reduced pressure, giving the product <b>3n</b> as a yellow oil (590.7mg, 88% yield).</p> |             |      |            |
| <b>Elemental analysis:</b>                                                                                                                                                                                                                                                                                                       | Calc: C: 69.79; H: 8.11; Cl: 15.84; N: 6.26; Found: C: 69.77; H: 8.12; Cl: 15.82; N: 6.25                                                                                                                                                                                                                                                                                                                                                                                                                                                                                                                                                                                                                                                                                                                                                                          |             |      |            |
| <b>Mol. Formula</b>                                                                                                                                                                                                                                                                                                              | C <sub>13</sub> H <sub>18</sub> ClN                                                                                                                                                                                                                                                                                                                                                                                                                                                                                                                                                                                                                                                                                                                                                                                                                                | <b>m.p.</b> | oil  |            |
| <b><sup>1</sup>H NMR (400 MHz, CDCl<sub>3</sub>)</b>                                                                                                                                                                                                                                                                             | δ value:                                                                                                                                                                                                                                                                                                                                                                                                                                                                                                                                                                                                                                                                                                                                                                                                                                                           | No. H       | Mult | J value/Hz |
|                                                                                                                                                                                                                                                                                                                                  | 7.27                                                                                                                                                                                                                                                                                                                                                                                                                                                                                                                                                                                                                                                                                                                                                                                                                                                               | 4           | m    |            |
|                                                                                                                                                                                                                                                                                                                                  | 3.79                                                                                                                                                                                                                                                                                                                                                                                                                                                                                                                                                                                                                                                                                                                                                                                                                                                               | 2           | s    |            |
|                                                                                                                                                                                                                                                                                                                                  | 2.47                                                                                                                                                                                                                                                                                                                                                                                                                                                                                                                                                                                                                                                                                                                                                                                                                                                               | 1           | tt   | 10.2, 3.6  |
|                                                                                                                                                                                                                                                                                                                                  | 1.91                                                                                                                                                                                                                                                                                                                                                                                                                                                                                                                                                                                                                                                                                                                                                                                                                                                               | 2           | m    |            |
|                                                                                                                                                                                                                                                                                                                                  | 1.74                                                                                                                                                                                                                                                                                                                                                                                                                                                                                                                                                                                                                                                                                                                                                                                                                                                               | 2           | m    |            |
|                                                                                                                                                                                                                                                                                                                                  | 1.20                                                                                                                                                                                                                                                                                                                                                                                                                                                                                                                                                                                                                                                                                                                                                                                                                                                               | 6           | m    |            |
| <b><sup>13</sup>C NMR (100.6 Hz, CDCl<sub>3</sub>)</b>                                                                                                                                                                                                                                                                           | δ: 139.6, 132.4, 129.4, 128.5, 56.2, 50.3, 33.6, 26.2, 25.0.                                                                                                                                                                                                                                                                                                                                                                                                                                                                                                                                                                                                                                                                                                                                                                                                       |             |      |            |
| <b>GC-EIMS (m/z, %):</b>                                                                                                                                                                                                                                                                                                         | 223(35), 182(23), 180(71), 127(29), 125(100).                                                                                                                                                                                                                                                                                                                                                                                                                                                                                                                                                                                                                                                                                                                                                                                                                      |             |      |            |

|                                                                                                                                                                                                                                                                                                                                 |                                                                                                                                                                                                                                                                                                                                                                                                                                                                                                                                                                                                                                                                                                                                                                                                                                                                                                                    |             |      |            |
|---------------------------------------------------------------------------------------------------------------------------------------------------------------------------------------------------------------------------------------------------------------------------------------------------------------------------------|--------------------------------------------------------------------------------------------------------------------------------------------------------------------------------------------------------------------------------------------------------------------------------------------------------------------------------------------------------------------------------------------------------------------------------------------------------------------------------------------------------------------------------------------------------------------------------------------------------------------------------------------------------------------------------------------------------------------------------------------------------------------------------------------------------------------------------------------------------------------------------------------------------------------|-------------|------|------------|
| <b>Chem. Name</b>                                                                                                                                                                                                                                                                                                               | N-(4-chlorobenzyl)cyclopentan-1-amine ( <b>3o</b> )                                                                                                                                                                                                                                                                                                                                                                                                                                                                                                                                                                                                                                                                                                                                                                                                                                                                |             |      |            |
| <b>Lit. Ref.</b>                                                                                                                                                                                                                                                                                                                |                                                                                                                                                                                                                                                                                                                                                                                                                                                                                                                                                                                                                                                                                                                                                                                                                                                                                                                    |             |      |            |
| <p style="text-align: center;"> <chem>Clc1ccc(C=O)cc1</chem> (<b>1c</b>) + <chem>Nc1CCCC1</chem> (<b>2h</b>) <math>\xrightarrow[\text{CH}_3\text{CN:H}_2\text{O (az.) 1M, 300 mA, r.t., 2.75F/mol}]{\text{C(-) - Al(+), Et}_4\text{NBr 1 eq}}</math> <chem>Clc1ccc(CCN1CCCC1)cc1</chem> (<b>3o</b>)<br/> <b>MW: 209.72</b> </p> |                                                                                                                                                                                                                                                                                                                                                                                                                                                                                                                                                                                                                                                                                                                                                                                                                                                                                                                    |             |      |            |
| <b>Method:</b>                                                                                                                                                                                                                                                                                                                  | <p>Prepared according to general procedure A: in a 8mL vial equipped with a magnetic stirrer and a two electrodes system (aluminium anode and graphite cathode) tetraethylammonium bromide (627.45 mg, 3 mmol), 4-chlorobenzaldehyde <b>1c</b> (421.71 mg, 3 mmol), cyclopentylamine <b>2h</b> (255.45 mg, 3 mmol) and 3 mL of azeotropic mixture of acetonitrile : water (84% w/w acetonitrile) were consecutively added and the resulting mixture was electrolyzed in CCE at 300 mA under stirring at room temperature until 2.75 F/mol of current were passed (ca. 45 minutes). After reaction completion the mixture was concentrated under reduced pressure. The residue was diluted with 10 mL of ethyl acetate, then it was filtered on cotton using compressed air to speed up the process and concentrated under reduced pressure, giving the product <b>3o</b> as a yellow oil (509.6mg, 81% yield).</p> |             |      |            |
| <b>Elemental analysis:</b>                                                                                                                                                                                                                                                                                                      | <p>Calc: C: 68.73; H: 7.69; Cl:16.90; N: 6.68; Found: C: 68.74; H: 7.69; Cl: 16.91; N: 6.66</p>                                                                                                                                                                                                                                                                                                                                                                                                                                                                                                                                                                                                                                                                                                                                                                                                                    |             |      |            |
| <b>Mol. Formula</b>                                                                                                                                                                                                                                                                                                             | C <sub>12</sub> H <sub>16</sub> ClN                                                                                                                                                                                                                                                                                                                                                                                                                                                                                                                                                                                                                                                                                                                                                                                                                                                                                | <b>m.p.</b> | oil  |            |
| <b><sup>1</sup>H NMR (400 MHz, CDCl<sub>3</sub>)</b>                                                                                                                                                                                                                                                                            | $\delta$ value:                                                                                                                                                                                                                                                                                                                                                                                                                                                                                                                                                                                                                                                                                                                                                                                                                                                                                                    | No. H       | Mult | J value/Hz |
|                                                                                                                                                                                                                                                                                                                                 | 7.27                                                                                                                                                                                                                                                                                                                                                                                                                                                                                                                                                                                                                                                                                                                                                                                                                                                                                                               | 4           | m    |            |
|                                                                                                                                                                                                                                                                                                                                 | 3.73                                                                                                                                                                                                                                                                                                                                                                                                                                                                                                                                                                                                                                                                                                                                                                                                                                                                                                               | 2           | s    |            |
|                                                                                                                                                                                                                                                                                                                                 | 3.09                                                                                                                                                                                                                                                                                                                                                                                                                                                                                                                                                                                                                                                                                                                                                                                                                                                                                                               | 1           | p    | 6.6        |
|                                                                                                                                                                                                                                                                                                                                 | 1.84                                                                                                                                                                                                                                                                                                                                                                                                                                                                                                                                                                                                                                                                                                                                                                                                                                                                                                               | 2           | m    |            |
|                                                                                                                                                                                                                                                                                                                                 | 1.70                                                                                                                                                                                                                                                                                                                                                                                                                                                                                                                                                                                                                                                                                                                                                                                                                                                                                                               | 2           | m    |            |
|                                                                                                                                                                                                                                                                                                                                 | 1.54                                                                                                                                                                                                                                                                                                                                                                                                                                                                                                                                                                                                                                                                                                                                                                                                                                                                                                               | 2           | m    |            |
|                                                                                                                                                                                                                                                                                                                                 | 1.36                                                                                                                                                                                                                                                                                                                                                                                                                                                                                                                                                                                                                                                                                                                                                                                                                                                                                                               | 2           | m    |            |
| <b><sup>13</sup>C NMR (100.6 Hz, CDCl<sub>3</sub>)</b>                                                                                                                                                                                                                                                                          | $\delta$ : 139.3, 132.5, 129.5, 128.4, 59.2, 52.0, 33.2, 24.1.                                                                                                                                                                                                                                                                                                                                                                                                                                                                                                                                                                                                                                                                                                                                                                                                                                                     |             |      |            |
| <b>GC-EIMS (m/z, %):</b>                                                                                                                                                                                                                                                                                                        | 209(27), 182(26), 180(82), 166(14), 127(31), 125(100).                                                                                                                                                                                                                                                                                                                                                                                                                                                                                                                                                                                                                                                                                                                                                                                                                                                             |             |      |            |

|                                                                                                                                                                                                                                                                                                                                                                                            |                                                                                                                                                                                                                                                                                                                                                                                                                                                                                                                                                                                                                                                                                                                                                                                                                                                                                                               |             |           |            |
|--------------------------------------------------------------------------------------------------------------------------------------------------------------------------------------------------------------------------------------------------------------------------------------------------------------------------------------------------------------------------------------------|---------------------------------------------------------------------------------------------------------------------------------------------------------------------------------------------------------------------------------------------------------------------------------------------------------------------------------------------------------------------------------------------------------------------------------------------------------------------------------------------------------------------------------------------------------------------------------------------------------------------------------------------------------------------------------------------------------------------------------------------------------------------------------------------------------------------------------------------------------------------------------------------------------------|-------------|-----------|------------|
| <b>Chem. Name</b>                                                                                                                                                                                                                                                                                                                                                                          | N-benzyl-1-(4-chlorophenyl)methanamine ( <b>3p</b> )                                                                                                                                                                                                                                                                                                                                                                                                                                                                                                                                                                                                                                                                                                                                                                                                                                                          |             |           |            |
| <b>Lit. Ref.</b>                                                                                                                                                                                                                                                                                                                                                                           | S. Das, B. Join, K. Junge and M. Beller, <i>Chem. Comm.</i> , 2012, <b>48</b> , 2683.                                                                                                                                                                                                                                                                                                                                                                                                                                                                                                                                                                                                                                                                                                                                                                                                                         |             |           |            |
| <p style="text-align: center;"> <math>\text{C(-) - Al(+)}</math><br/> <math>\text{Et}_4\text{NBr 1 eq}</math><br/> <math>\text{CH}_3\text{CN:H}_2\text{O (az.) 1M}</math><br/> <math>300 \text{ mA, r.t., 2.75F/mol}</math> </p> <p style="text-align: center;"><b>1c</b>                      <b>2i</b>                                              <b>3p</b><br/> <b>MW: 231.72</b></p> |                                                                                                                                                                                                                                                                                                                                                                                                                                                                                                                                                                                                                                                                                                                                                                                                                                                                                                               |             |           |            |
| <b>Method:</b>                                                                                                                                                                                                                                                                                                                                                                             | <p>Prepared according to general procedure A: in a 8mL vial equipped with a magnetic stirrer and a two electrodes system (aluminium anode and graphite cathode) tetraethylammonium bromide (627.45 mg, 3 mmol), 4-chlorobenzaldehyde <b>1c</b> (421.71 mg, 3 mmol), benzylamine <b>2i</b> (321.48 mg, 3 mmol) and 3 mL of azeotropic mixture of acetonitrile : water (84% w/w acetonitrile) were consecutively added and the resulting mixture was electrolyzed in CCE at 300 mA under stirring at room temperature until 2.75 F/mol of current were passed (ca. 45 minutes). After reaction completion the mixture was concentrated under reduced pressure. The residue was diluted with 10 mL of ethyl acetate, then it was filtered on cotton using compressed air to speed up the process and concentrated under reduced pressure, giving the product <b>3p</b> as a yellow oil (597.8mg, 86% yield).</p> |             |           |            |
| <b>Elemental analysis:</b>                                                                                                                                                                                                                                                                                                                                                                 | Calc: C: 56.25; H: 4.20; N: 14.58; Found: C: 56.27; H: 4.19; N: 14.57                                                                                                                                                                                                                                                                                                                                                                                                                                                                                                                                                                                                                                                                                                                                                                                                                                         |             |           |            |
| <b>Mol. Formula</b>                                                                                                                                                                                                                                                                                                                                                                        | C <sub>9</sub> H <sub>8</sub> FNO                                                                                                                                                                                                                                                                                                                                                                                                                                                                                                                                                                                                                                                                                                                                                                                                                                                                             | <b>m.p.</b> | 177-179°C |            |
| <b><sup>1</sup>H NMR (400 MHz, CDCl<sub>3</sub>)</b>                                                                                                                                                                                                                                                                                                                                       | δ value:                                                                                                                                                                                                                                                                                                                                                                                                                                                                                                                                                                                                                                                                                                                                                                                                                                                                                                      | No. H       | Mult      | J value/Hz |
|                                                                                                                                                                                                                                                                                                                                                                                            | 7.35                                                                                                                                                                                                                                                                                                                                                                                                                                                                                                                                                                                                                                                                                                                                                                                                                                                                                                          | 9           | m         |            |
|                                                                                                                                                                                                                                                                                                                                                                                            | 3.81                                                                                                                                                                                                                                                                                                                                                                                                                                                                                                                                                                                                                                                                                                                                                                                                                                                                                                          | 4           | d         | 8.9        |
| <b><sup>13</sup>C NMR (100.6 Hz, CDCl<sub>3</sub>)</b>                                                                                                                                                                                                                                                                                                                                     | δ: 140.2, 138.9, 132.6, 129.5, 128.5, 128.4, 128.2, 127.1, 53.1, 52.4.                                                                                                                                                                                                                                                                                                                                                                                                                                                                                                                                                                                                                                                                                                                                                                                                                                        |             |           |            |
| <b>GC-EIMS (m/z, %):</b>                                                                                                                                                                                                                                                                                                                                                                   | 231(42), 230(27), 142(27), 140(87), 127(29), 125(79), 106(36), 92(35), 91(100).                                                                                                                                                                                                                                                                                                                                                                                                                                                                                                                                                                                                                                                                                                                                                                                                                               |             |           |            |

|                                                                                                                                                                                                                                                                                                             |                                                                                                                                                                                                                                                                                                                                                                                                                                                                                                                                                                                                                                                                                                                                                                                                                                                                                                                                                                                                                                                                                                                                                                                                                                                             |             |           |            |
|-------------------------------------------------------------------------------------------------------------------------------------------------------------------------------------------------------------------------------------------------------------------------------------------------------------|-------------------------------------------------------------------------------------------------------------------------------------------------------------------------------------------------------------------------------------------------------------------------------------------------------------------------------------------------------------------------------------------------------------------------------------------------------------------------------------------------------------------------------------------------------------------------------------------------------------------------------------------------------------------------------------------------------------------------------------------------------------------------------------------------------------------------------------------------------------------------------------------------------------------------------------------------------------------------------------------------------------------------------------------------------------------------------------------------------------------------------------------------------------------------------------------------------------------------------------------------------------|-------------|-----------|------------|
| <b>Chem. Name</b>                                                                                                                                                                                                                                                                                           | N-(1-phenylethyl)butan-1-amine ( <b>3q</b> )                                                                                                                                                                                                                                                                                                                                                                                                                                                                                                                                                                                                                                                                                                                                                                                                                                                                                                                                                                                                                                                                                                                                                                                                                |             |           |            |
| <b>Lit. Ref.</b>                                                                                                                                                                                                                                                                                            |                                                                                                                                                                                                                                                                                                                                                                                                                                                                                                                                                                                                                                                                                                                                                                                                                                                                                                                                                                                                                                                                                                                                                                                                                                                             |             |           |            |
| 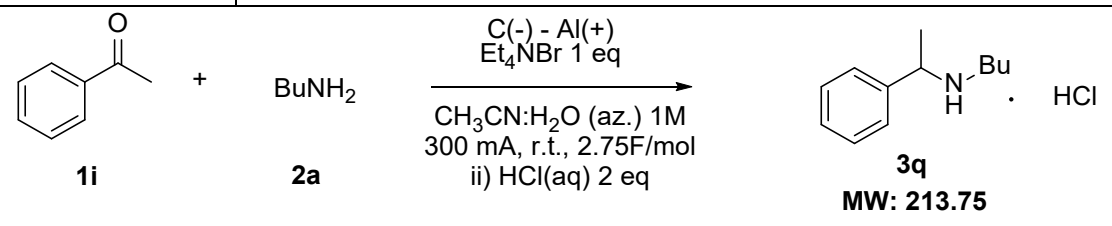 <p> <math>\text{1i} + \text{2a} \xrightarrow[\text{ii) HCl(aq) 2 eq}]{\text{C(-) - Al(+), Et}_4\text{NBr 1 eq, CH}_3\text{CN:H}_2\text{O (az.) 1M, 300 mA, r.t., 2.75F/mol}}</math> </p> <p><b>3q</b><br/>MW: 213.75</p> |                                                                                                                                                                                                                                                                                                                                                                                                                                                                                                                                                                                                                                                                                                                                                                                                                                                                                                                                                                                                                                                                                                                                                                                                                                                             |             |           |            |
| <b>Method:</b>                                                                                                                                                                                                                                                                                              | <p>Prepared according to general procedure B: In a 8 mL vial equipped with a cap and a magnetic stirrer add acetophenone <b>1i</b> (360.45 mg, 3 mmol) and butylamine <b>2a</b> (219.42 mg, 3 mmol). Let the mixture stir at 90°C for 5 hours. After this time, let the reaction mixture cool to room temperature, then equip the vial with a two electrodes system (aluminium anode and graphite cathode). Add tetraethylammonium bromide (627.45 mg, 3 mmol) and 3 mL of azeotropic mixture of acetonitrile : water (84% w/w acetonitrile), then electrolyze the resulting mixture in CCE at 300 mA under stirring at room temperature until 2.75 F/mol of current were passed (ca. 45 minutes). After reaction completion the mixture was concentrated under reduced pressure. The residue was diluted in 10 mL of ethyl acetate, then it was filtered on cotton using compressed air to speed up the process and concentrated under reduced pressure, giving the crude product. The crude product is further purified by adding HCl(aq.) (2 eq.). Remove water under reduced pressure, then add a mixture of ethyl acetate : petroleum ether (1 : 9) in order to obtain hydrochloride salt product <b>3q</b> (397.6mg, 62% yield) as white crystal.</p> |             |           |            |
| <b>Elemental analysis:</b>                                                                                                                                                                                                                                                                                  | Calc: C: 67.43; H: 9.43; Cl: 16.58; N: 6.55; Found: C: 67.42; H: 9.44; Cl: 16.58; N: 6.55                                                                                                                                                                                                                                                                                                                                                                                                                                                                                                                                                                                                                                                                                                                                                                                                                                                                                                                                                                                                                                                                                                                                                                   |             |           |            |
| <b>Mol. Formula</b>                                                                                                                                                                                                                                                                                         | C <sub>12</sub> H <sub>20</sub> ClN                                                                                                                                                                                                                                                                                                                                                                                                                                                                                                                                                                                                                                                                                                                                                                                                                                                                                                                                                                                                                                                                                                                                                                                                                         | <b>m.p.</b> | 142-144°C |            |
| <b><sup>1</sup>H NMR (400 MHz, MeOH-d<sup>4</sup>)</b>                                                                                                                                                                                                                                                      | δ value:                                                                                                                                                                                                                                                                                                                                                                                                                                                                                                                                                                                                                                                                                                                                                                                                                                                                                                                                                                                                                                                                                                                                                                                                                                                    | No. H       | Mult      | J value/Hz |
|                                                                                                                                                                                                                                                                                                             | 7.51                                                                                                                                                                                                                                                                                                                                                                                                                                                                                                                                                                                                                                                                                                                                                                                                                                                                                                                                                                                                                                                                                                                                                                                                                                                        | 5           | m         |            |
|                                                                                                                                                                                                                                                                                                             | 4.40                                                                                                                                                                                                                                                                                                                                                                                                                                                                                                                                                                                                                                                                                                                                                                                                                                                                                                                                                                                                                                                                                                                                                                                                                                                        | 1           | q         | 6.9        |
|                                                                                                                                                                                                                                                                                                             | 2.96                                                                                                                                                                                                                                                                                                                                                                                                                                                                                                                                                                                                                                                                                                                                                                                                                                                                                                                                                                                                                                                                                                                                                                                                                                                        | 1           | m         |            |
|                                                                                                                                                                                                                                                                                                             | 2.74                                                                                                                                                                                                                                                                                                                                                                                                                                                                                                                                                                                                                                                                                                                                                                                                                                                                                                                                                                                                                                                                                                                                                                                                                                                        | 1           | m         |            |
|                                                                                                                                                                                                                                                                                                             | 1.70                                                                                                                                                                                                                                                                                                                                                                                                                                                                                                                                                                                                                                                                                                                                                                                                                                                                                                                                                                                                                                                                                                                                                                                                                                                        | 5           | m         |            |
|                                                                                                                                                                                                                                                                                                             | 1.38                                                                                                                                                                                                                                                                                                                                                                                                                                                                                                                                                                                                                                                                                                                                                                                                                                                                                                                                                                                                                                                                                                                                                                                                                                                        | 2           | h         | 7.5        |
|                                                                                                                                                                                                                                                                                                             | 0.95                                                                                                                                                                                                                                                                                                                                                                                                                                                                                                                                                                                                                                                                                                                                                                                                                                                                                                                                                                                                                                                                                                                                                                                                                                                        | 3           | t         | 7.4        |
| <b><sup>13</sup>C NMR (100.6 Hz, MeOH-d<sup>4</sup>)</b>                                                                                                                                                                                                                                                    | δ: 136.4, 129.3, 129.1, 127.3, 58.3, 45.5, 27.8, 19.4, 18.3, 12.4.                                                                                                                                                                                                                                                                                                                                                                                                                                                                                                                                                                                                                                                                                                                                                                                                                                                                                                                                                                                                                                                                                                                                                                                          |             |           |            |

|                                                                                                                                                                                                                                                                                                                                                               |                                                                                                                                                                                                                                                                                                                                                                                                                                                                                                                                                                                                                                                                                                                                                                                                                                                                                                                                                                                                                                                                                                                                                                                                                                                                     |             |           |                 |
|---------------------------------------------------------------------------------------------------------------------------------------------------------------------------------------------------------------------------------------------------------------------------------------------------------------------------------------------------------------|---------------------------------------------------------------------------------------------------------------------------------------------------------------------------------------------------------------------------------------------------------------------------------------------------------------------------------------------------------------------------------------------------------------------------------------------------------------------------------------------------------------------------------------------------------------------------------------------------------------------------------------------------------------------------------------------------------------------------------------------------------------------------------------------------------------------------------------------------------------------------------------------------------------------------------------------------------------------------------------------------------------------------------------------------------------------------------------------------------------------------------------------------------------------------------------------------------------------------------------------------------------------|-------------|-----------|-----------------|
| <b>Chem. Name</b>                                                                                                                                                                                                                                                                                                                                             | N-(1-(p-tolyl)ethyl)butan-1-amine ( <b>3r</b> )                                                                                                                                                                                                                                                                                                                                                                                                                                                                                                                                                                                                                                                                                                                                                                                                                                                                                                                                                                                                                                                                                                                                                                                                                     |             |           |                 |
| <b>Lit. Ref.</b>                                                                                                                                                                                                                                                                                                                                              |                                                                                                                                                                                                                                                                                                                                                                                                                                                                                                                                                                                                                                                                                                                                                                                                                                                                                                                                                                                                                                                                                                                                                                                                                                                                     |             |           |                 |
| 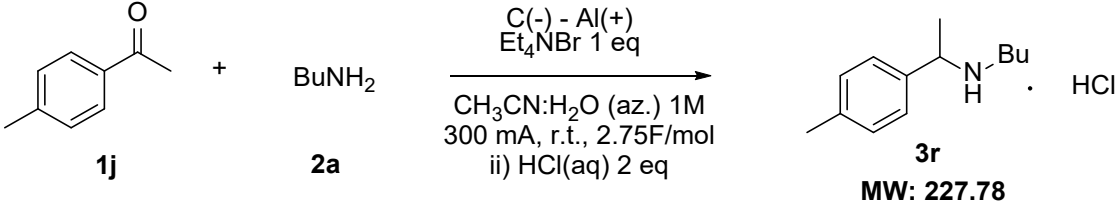 <p style="text-align: center;"><b>1j</b> + <b>2a</b> <math>\xrightarrow[\text{ii) HCl(aq) 2 eq}]{\text{C(-) - Al(+)<br/>Et<sub>4</sub>NBr 1 eq<br/>CH<sub>3</sub>CN:H<sub>2</sub>O (az.) 1M<br/>300 mA, r.t., 2.75F/mol}}</math> <b>3r</b> · HCl<br/><b>MW: 227.78</b></p> |                                                                                                                                                                                                                                                                                                                                                                                                                                                                                                                                                                                                                                                                                                                                                                                                                                                                                                                                                                                                                                                                                                                                                                                                                                                                     |             |           |                 |
| <b>Method:</b>                                                                                                                                                                                                                                                                                                                                                | <p>Prepared according to general procedure B: In a 8 mL vial equipped with a cap and a magnetic stirrer add 4-methylacetophenone <b>1j</b> (402.54 mg, 3 mmol) and butylamine <b>2a</b> (219.42 mg, 3 mmol). Let the mixture stir at 90°C for 5 hours. After this time, let the reaction mixture cool to room temperature, then equip the vial with a two electrodes system (aluminium anode and graphite cathode). Add tetraethylammonium bromide (627.45 mg, 3 mmol) and 3 mL of azeotropic mixture of acetonitrile : water (84% w/w acetonitrile), then electrolyze the resulting mixture in CCE at 300 mA under stirring at room temperature until 2.75 F/mol of current were passed (ca. 45 minutes). After reaction completion the mixture was concentrated under reduced pressure. The residue was diluted in 10 mL of ethyl acetate, then it was filtered on cotton using compressed air to speed up the process and concentrated under reduced pressure, giving the crude product. The crude product is further purified by adding HCl(aq.) (2 eq.). Remove water under reduced pressure, then add a mixture of ethyl acetate : petroleum ether (1 : 9) in order to obtain hydrochloride salt product <b>3r</b> (396.3mg, 58% yield) as white crystal.</p> |             |           |                 |
| <b>Elemental analysis:</b>                                                                                                                                                                                                                                                                                                                                    | Calc: C: 68.55; H: 9.74; Cl: 15.56; N: 6.15; Found: C: 68.53; H: 9.75; Cl: 15.56; N: 6.16                                                                                                                                                                                                                                                                                                                                                                                                                                                                                                                                                                                                                                                                                                                                                                                                                                                                                                                                                                                                                                                                                                                                                                           |             |           |                 |
| <b>Mol. Formula</b>                                                                                                                                                                                                                                                                                                                                           | C <sub>13</sub> H <sub>22</sub> ClN                                                                                                                                                                                                                                                                                                                                                                                                                                                                                                                                                                                                                                                                                                                                                                                                                                                                                                                                                                                                                                                                                                                                                                                                                                 | <b>m.p.</b> | 150-152°C |                 |
| <b><sup>1</sup>H NMR (400 MHz, MeOH-d<sup>4</sup>)</b>                                                                                                                                                                                                                                                                                                        | δ value:                                                                                                                                                                                                                                                                                                                                                                                                                                                                                                                                                                                                                                                                                                                                                                                                                                                                                                                                                                                                                                                                                                                                                                                                                                                            | No. H       | Mult      | J value/Hz      |
|                                                                                                                                                                                                                                                                                                                                                               | 7.35                                                                                                                                                                                                                                                                                                                                                                                                                                                                                                                                                                                                                                                                                                                                                                                                                                                                                                                                                                                                                                                                                                                                                                                                                                                                | 4           | m         |                 |
|                                                                                                                                                                                                                                                                                                                                                               | 4.33                                                                                                                                                                                                                                                                                                                                                                                                                                                                                                                                                                                                                                                                                                                                                                                                                                                                                                                                                                                                                                                                                                                                                                                                                                                                | 1           | m         |                 |
|                                                                                                                                                                                                                                                                                                                                                               | 2.92                                                                                                                                                                                                                                                                                                                                                                                                                                                                                                                                                                                                                                                                                                                                                                                                                                                                                                                                                                                                                                                                                                                                                                                                                                                                | 1           | ddd       | 12.5, 10.1, 5.8 |
|                                                                                                                                                                                                                                                                                                                                                               | 2.73                                                                                                                                                                                                                                                                                                                                                                                                                                                                                                                                                                                                                                                                                                                                                                                                                                                                                                                                                                                                                                                                                                                                                                                                                                                                | 1           | ddd       | 12.3, 10.0, 6.0 |
|                                                                                                                                                                                                                                                                                                                                                               | 2.39                                                                                                                                                                                                                                                                                                                                                                                                                                                                                                                                                                                                                                                                                                                                                                                                                                                                                                                                                                                                                                                                                                                                                                                                                                                                | 3           | s         |                 |
|                                                                                                                                                                                                                                                                                                                                                               | 1.66                                                                                                                                                                                                                                                                                                                                                                                                                                                                                                                                                                                                                                                                                                                                                                                                                                                                                                                                                                                                                                                                                                                                                                                                                                                                | 5           | m         |                 |
|                                                                                                                                                                                                                                                                                                                                                               | 1.38                                                                                                                                                                                                                                                                                                                                                                                                                                                                                                                                                                                                                                                                                                                                                                                                                                                                                                                                                                                                                                                                                                                                                                                                                                                                | 2           | h         | 7.4             |
| 0.95                                                                                                                                                                                                                                                                                                                                                          | 3                                                                                                                                                                                                                                                                                                                                                                                                                                                                                                                                                                                                                                                                                                                                                                                                                                                                                                                                                                                                                                                                                                                                                                                                                                                                   | t           | 7.4       |                 |
| <b><sup>13</sup>C NMR (100.6 Hz, MeOH-d<sup>4</sup>)</b>                                                                                                                                                                                                                                                                                                      | δ: 139.5, 133.3, 129.7, 127.3, 58.0, 45.3, 27.8, 19.8, 19.5, 18.3, 12.5.                                                                                                                                                                                                                                                                                                                                                                                                                                                                                                                                                                                                                                                                                                                                                                                                                                                                                                                                                                                                                                                                                                                                                                                            |             |           |                 |



|                                                                                                                                                                                                                                                                                                                                                                                                                                                                                                                                                                                                                                                                                                                                                                                                                                                                                                                                                                                                                                                                                                                                                                                                                                                                      |                                                        |             |           |                 |
|----------------------------------------------------------------------------------------------------------------------------------------------------------------------------------------------------------------------------------------------------------------------------------------------------------------------------------------------------------------------------------------------------------------------------------------------------------------------------------------------------------------------------------------------------------------------------------------------------------------------------------------------------------------------------------------------------------------------------------------------------------------------------------------------------------------------------------------------------------------------------------------------------------------------------------------------------------------------------------------------------------------------------------------------------------------------------------------------------------------------------------------------------------------------------------------------------------------------------------------------------------------------|--------------------------------------------------------|-------------|-----------|-----------------|
| <b>Chem. Name</b>                                                                                                                                                                                                                                                                                                                                                                                                                                                                                                                                                                                                                                                                                                                                                                                                                                                                                                                                                                                                                                                                                                                                                                                                                                                    | N-(1-(4-chlorophenyl)ethyl)butan-1-amine ( <b>3s</b> ) |             |           |                 |
| <b>Lit. Ref.</b>                                                                                                                                                                                                                                                                                                                                                                                                                                                                                                                                                                                                                                                                                                                                                                                                                                                                                                                                                                                                                                                                                                                                                                                                                                                     |                                                        |             |           |                 |
| <p style="text-align: center;"> <chem>CC(=O)c1ccc(Cl)cc1</chem> (<b>1k</b>) + <chem>CCCCN</chem> (<b>2a</b>) <math>\xrightarrow[\text{ii) HCl(aq) 2 eq}]{\text{C(-) - Al(+), Et}_4\text{NBr 1 eq, CH}_3\text{CN:H}_2\text{O (az.) 1M, 300 mA, r.t., 2.75F/mol}}</math> <chem>CC(C)N(CCCC)C1=CC=C(Cl)C=C1</chem> (<b>3s</b>) <math>\cdot</math> HCl<br/> <b>MW: 248.19</b> </p>                                                                                                                                                                                                                                                                                                                                                                                                                                                                                                                                                                                                                                                                                                                                                                                                                                                                                       |                                                        |             |           |                 |
| <b>Method:</b>                                                                                                                                                                                                                                                                                                                                                                                                                                                                                                                                                                                                                                                                                                                                                                                                                                                                                                                                                                                                                                                                                                                                                                                                                                                       |                                                        |             |           |                 |
| <p>Prepared according to general procedure B: In a 8 mL vial equipped with a cap and a magnetic stirrer add 4-chloroacetophenone <b>1k</b> (463.77 mg, 3 mmol) and butylamine <b>2a</b> (219.42 mg, 3 mmol). Let the mixture stir at 90°C for 5 hours. After this time, let the reaction mixture cool to room temperature, then equip the vial with a two electrodes system (aluminium anode and graphite cathode). Add tetraethylammonium bromide (627.45 mg, 3 mmol) and 3 mL of azeotropic mixture of acetonitrile : water (84% w/w acetonitrile), then electrolyze the resulting mixture in CCE at 300 mA under stirring at room temperature until 2.75 F/mol of current were passed (ca. 45 minutes). After reaction completion the mixture was concentrated under reduced pressure. The residue was diluted in 10 mL of ethyl acetate, then it was filtered on cotton using compressed air to speed up the process and concentrated under reduced pressure, giving the crude product. The crude product is further purified by adding HCl(aq.) (2 eq.). Remove water under reduced pressure, then add a mixture of ethyl acetate : petroleum ether (1 : 9) in order to obtain hydrochloride salt product <b>3s</b> (379.7 mg, 51% yield) as white crystal.</p> |                                                        |             |           |                 |
| <b>Elemental analysis:</b> Calc: C: 58.07; H: 7.72; Cl: 28.57; N: 5.64; Found: C: 58.06; H: 7.72; Cl: 28.57; N: 5.65                                                                                                                                                                                                                                                                                                                                                                                                                                                                                                                                                                                                                                                                                                                                                                                                                                                                                                                                                                                                                                                                                                                                                 |                                                        |             |           |                 |
| <b>Mol. Formula</b>                                                                                                                                                                                                                                                                                                                                                                                                                                                                                                                                                                                                                                                                                                                                                                                                                                                                                                                                                                                                                                                                                                                                                                                                                                                  | C <sub>12</sub> H <sub>19</sub> Cl <sub>2</sub> N      | <b>m.p.</b> | 163-165°C |                 |
| <b><sup>1</sup>H NMR (400 MHz, CDCl<sub>3</sub>)</b>                                                                                                                                                                                                                                                                                                                                                                                                                                                                                                                                                                                                                                                                                                                                                                                                                                                                                                                                                                                                                                                                                                                                                                                                                 | δ value:                                               | No. H       | Mult      | J value/Hz      |
|                                                                                                                                                                                                                                                                                                                                                                                                                                                                                                                                                                                                                                                                                                                                                                                                                                                                                                                                                                                                                                                                                                                                                                                                                                                                      | 7.54                                                   | 4           | m         |                 |
|                                                                                                                                                                                                                                                                                                                                                                                                                                                                                                                                                                                                                                                                                                                                                                                                                                                                                                                                                                                                                                                                                                                                                                                                                                                                      | 4.43                                                   | 1           | m         |                 |
|                                                                                                                                                                                                                                                                                                                                                                                                                                                                                                                                                                                                                                                                                                                                                                                                                                                                                                                                                                                                                                                                                                                                                                                                                                                                      | 2.97                                                   | 1           | ddd       | 12.2, 10.1, 5.9 |
|                                                                                                                                                                                                                                                                                                                                                                                                                                                                                                                                                                                                                                                                                                                                                                                                                                                                                                                                                                                                                                                                                                                                                                                                                                                                      | 2.76                                                   | 1           | m         |                 |
|                                                                                                                                                                                                                                                                                                                                                                                                                                                                                                                                                                                                                                                                                                                                                                                                                                                                                                                                                                                                                                                                                                                                                                                                                                                                      | 1.69                                                   | 5           | m         |                 |
|                                                                                                                                                                                                                                                                                                                                                                                                                                                                                                                                                                                                                                                                                                                                                                                                                                                                                                                                                                                                                                                                                                                                                                                                                                                                      | 1.39                                                   | 2           | h         | 7.5             |
|                                                                                                                                                                                                                                                                                                                                                                                                                                                                                                                                                                                                                                                                                                                                                                                                                                                                                                                                                                                                                                                                                                                                                                                                                                                                      | 0.96                                                   | 3           | t         | 7.6             |
| <b><sup>13</sup>C NMR (100.6 Hz, CDCl<sub>3</sub>)</b> δ: 135.2, 135.1, 129.3, 129.2, 57.6, 45.6, 27.9, 19.5, 18.3, 12.6.                                                                                                                                                                                                                                                                                                                                                                                                                                                                                                                                                                                                                                                                                                                                                                                                                                                                                                                                                                                                                                                                                                                                            |                                                        |             |           |                 |

|                                                                                                                                                                                                                                                                                                                                                                                                                                                                                                                                                                                                                                                                                                                                                                                                                                                                                                                                                                                                                                                                                                                                                                                                                                                                  |                                                         |             |           |            |
|------------------------------------------------------------------------------------------------------------------------------------------------------------------------------------------------------------------------------------------------------------------------------------------------------------------------------------------------------------------------------------------------------------------------------------------------------------------------------------------------------------------------------------------------------------------------------------------------------------------------------------------------------------------------------------------------------------------------------------------------------------------------------------------------------------------------------------------------------------------------------------------------------------------------------------------------------------------------------------------------------------------------------------------------------------------------------------------------------------------------------------------------------------------------------------------------------------------------------------------------------------------|---------------------------------------------------------|-------------|-----------|------------|
| <b>Chem. Name</b>                                                                                                                                                                                                                                                                                                                                                                                                                                                                                                                                                                                                                                                                                                                                                                                                                                                                                                                                                                                                                                                                                                                                                                                                                                                | N-(1-(naphthalen-1-yl)ethyl)butan-1-amine ( <b>3t</b> ) |             |           |            |
| <b>Lit. Ref.</b>                                                                                                                                                                                                                                                                                                                                                                                                                                                                                                                                                                                                                                                                                                                                                                                                                                                                                                                                                                                                                                                                                                                                                                                                                                                 |                                                         |             |           |            |
| <p style="text-align: center;"> <math>\text{1I} + \text{2a} \xrightarrow[\text{ii) HCl(aq) 2 eq}]{\text{C(-) - Al(+), Et}_4\text{NBr 1 eq, CH}_3\text{CN:H}_2\text{O (az.) 1M, 300 mA, r.t., 2.75F/mol}}</math> </p> <p style="text-align: center;"><b>3t</b>      <b>MW: 263.81</b></p>                                                                                                                                                                                                                                                                                                                                                                                                                                                                                                                                                                                                                                                                                                                                                                                                                                                                                                                                                                         |                                                         |             |           |            |
| <b>Method:</b>                                                                                                                                                                                                                                                                                                                                                                                                                                                                                                                                                                                                                                                                                                                                                                                                                                                                                                                                                                                                                                                                                                                                                                                                                                                   |                                                         |             |           |            |
| <p>Prepared according to general procedure B: In a 8 mL vial equipped with a cap and a magnetic stirrer add 1-acetonaphthone <b>1I</b> (510.63 mg, 3 mmol) and butylamine <b>2a</b> (219.42 mg, 3 mmol). Let the mixture stir at 90°C for 5 hours. After this time, let the reaction mixture cool to room temperature, then equip the vial with a two electrodes system (aluminium anode and graphite cathode). Add tetraethylammonium bromide (627.45 mg, 3 mmol) and 3 mL of azeotropic mixture of acetonitrile : water (84% w/w acetonitrile), then electrolyze the resulting mixture in CCE at 300 mA under stirring at room temperature until 2.75 F/mol of current were passed (ca. 45 minutes). After reaction completion the mixture was concentrated under reduced pressure. The residue was diluted in 10 mL of ethyl acetate, then it was filtered on cotton using compressed air to speed up the process and concentrated under reduced pressure, giving the crude product. The crude product is further purified by adding HCl(aq.) (2 eq.). Remove water under reduced pressure, then add a mixture of ethyl acetate : petroleum ether (1 : 9) in order to obtain hydrochloride salt product <b>3t</b> (419.5 mg, 53% yield) as white crystal.</p> |                                                         |             |           |            |
| <b>Elemental analysis:</b> Calc: C: 72.85; H: 8.41; Cl: 13.44; N: 5.31; Found: C: 72.83; H: 8.42; Cl: 13.46; N: 5.30                                                                                                                                                                                                                                                                                                                                                                                                                                                                                                                                                                                                                                                                                                                                                                                                                                                                                                                                                                                                                                                                                                                                             |                                                         |             |           |            |
| <b>Mol. Formula</b>                                                                                                                                                                                                                                                                                                                                                                                                                                                                                                                                                                                                                                                                                                                                                                                                                                                                                                                                                                                                                                                                                                                                                                                                                                              | C <sub>16</sub> H <sub>22</sub> ClN                     | <b>m.p.</b> | 177-179°C |            |
| <b><sup>1</sup>H NMR (400 MHz, MeOH-d<sup>4</sup>)</b>                                                                                                                                                                                                                                                                                                                                                                                                                                                                                                                                                                                                                                                                                                                                                                                                                                                                                                                                                                                                                                                                                                                                                                                                           | δ value:                                                | No. H       | Mult      | J value/Hz |
|                                                                                                                                                                                                                                                                                                                                                                                                                                                                                                                                                                                                                                                                                                                                                                                                                                                                                                                                                                                                                                                                                                                                                                                                                                                                  | 8.23                                                    | 1           | d         | 8.6        |
|                                                                                                                                                                                                                                                                                                                                                                                                                                                                                                                                                                                                                                                                                                                                                                                                                                                                                                                                                                                                                                                                                                                                                                                                                                                                  | 7.99                                                    | 2           | d         | 8.2        |
|                                                                                                                                                                                                                                                                                                                                                                                                                                                                                                                                                                                                                                                                                                                                                                                                                                                                                                                                                                                                                                                                                                                                                                                                                                                                  | 7.82                                                    | 1           | d         | 7.2        |
|                                                                                                                                                                                                                                                                                                                                                                                                                                                                                                                                                                                                                                                                                                                                                                                                                                                                                                                                                                                                                                                                                                                                                                                                                                                                  | 7.63                                                    | 3           | m         |            |
|                                                                                                                                                                                                                                                                                                                                                                                                                                                                                                                                                                                                                                                                                                                                                                                                                                                                                                                                                                                                                                                                                                                                                                                                                                                                  | 5.40                                                    | 1           | q         | 6.7        |
|                                                                                                                                                                                                                                                                                                                                                                                                                                                                                                                                                                                                                                                                                                                                                                                                                                                                                                                                                                                                                                                                                                                                                                                                                                                                  | 3.09                                                    | 1           | m         |            |
|                                                                                                                                                                                                                                                                                                                                                                                                                                                                                                                                                                                                                                                                                                                                                                                                                                                                                                                                                                                                                                                                                                                                                                                                                                                                  | 2.86                                                    | 1           | m         |            |
|                                                                                                                                                                                                                                                                                                                                                                                                                                                                                                                                                                                                                                                                                                                                                                                                                                                                                                                                                                                                                                                                                                                                                                                                                                                                  | 1.82                                                    | 3           | d         | 6.7        |
|                                                                                                                                                                                                                                                                                                                                                                                                                                                                                                                                                                                                                                                                                                                                                                                                                                                                                                                                                                                                                                                                                                                                                                                                                                                                  | 1.70                                                    | 2           | m         |            |
| 1.36                                                                                                                                                                                                                                                                                                                                                                                                                                                                                                                                                                                                                                                                                                                                                                                                                                                                                                                                                                                                                                                                                                                                                                                                                                                             | 2                                                       | h           | 7.4       |            |
| 0.92                                                                                                                                                                                                                                                                                                                                                                                                                                                                                                                                                                                                                                                                                                                                                                                                                                                                                                                                                                                                                                                                                                                                                                                                                                                             | 3                                                       | t           | 7.3       |            |
| <b><sup>13</sup>C NMR (100.6 Hz, MeOH-d<sup>4</sup>)</b> δ: 134.1, 133.0, 130.7, 129.5, 129.0, 127.1, 126.2, 125.2, 123.5, 121.7, 52.8, 45.9, 28.0, 19.5, 18.8, 12.4.                                                                                                                                                                                                                                                                                                                                                                                                                                                                                                                                                                                                                                                                                                                                                                                                                                                                                                                                                                                                                                                                                            |                                                         |             |           |            |

|                                                                                                                                                                                                                                                                                                                                                                                                                                                                                                                                                                                                                                                                                                                                                                                                                                                 |                                                                                                                                   |             |      |            |
|-------------------------------------------------------------------------------------------------------------------------------------------------------------------------------------------------------------------------------------------------------------------------------------------------------------------------------------------------------------------------------------------------------------------------------------------------------------------------------------------------------------------------------------------------------------------------------------------------------------------------------------------------------------------------------------------------------------------------------------------------------------------------------------------------------------------------------------------------|-----------------------------------------------------------------------------------------------------------------------------------|-------------|------|------------|
| <b>Chem. Name</b>                                                                                                                                                                                                                                                                                                                                                                                                                                                                                                                                                                                                                                                                                                                                                                                                                               | N-butylfurfurylamine ( <b>3u</b> )                                                                                                |             |      |            |
| <b>Lit. Ref.</b>                                                                                                                                                                                                                                                                                                                                                                                                                                                                                                                                                                                                                                                                                                                                                                                                                                | P. Galletti, A. Montecavalli, F. Moretti, A. Pasteris, C. Samori and E. Tagliavini, <i>New J. Chem.</i> , 2009, <b>33</b> , 1859. |             |      |            |
| <p style="text-align: center;"> <chem>O=Cc1ccoc1</chem> (<b>1m</b>) + <chem>CCCCN</chem> (<b>2a</b>) <math>\xrightarrow[\text{300mA, r.t., 3F/mol}]{\text{C(-) - Al(+), Et}_4\text{NBr 1 eq, CH}_3\text{CN:H}_2\text{O (az.) 1M}}</math> <chem>CCCNc1ccoc1</chem> (<b>3u</b>)<br/> <b>MW: 153.23</b> </p>                                                                                                                                                                                                                                                                                                                                                                                                                                                                                                                                       |                                                                                                                                   |             |      |            |
| <b>Method:</b>                                                                                                                                                                                                                                                                                                                                                                                                                                                                                                                                                                                                                                                                                                                                                                                                                                  |                                                                                                                                   |             |      |            |
| <p>Prepared according to general procedure A: in a 8mL vial equipped with a magnetic stirrer and a two electrodes system (aluminium anode and graphite cathode) tetraethylammonium bromide (627.45 mg, 3 mmol), furfural <b>1m</b> (288.27 mg, 3 mmol), butylamine <b>2a</b> (219.42 mg, 3 mmol) and 3 mL of azeotropic mixture of acetonitrile : water (84% w/w acetonitrile) were consecutively added and the resulting mixture was electrolyzed in CCE at 300 mA under stirring at room temperature until 3 F/mol of current were passed (ca. 50 minutes). After reaction completion the mixture was concentrated under reduced pressure. The residue was diluted in 10 mL of ethyl acetate, then it was filtered on cotton and concentrated under reduced pressure, giving the product <b>3u</b> as a yellow oil (340.2 mg, 74% yield).</p> |                                                                                                                                   |             |      |            |
| <b>Elemental analysis:</b> Calc: C: 70.55; H: 9.87; N: 9.14; Found: C: 70.54; H: 9.86; N: 9.15                                                                                                                                                                                                                                                                                                                                                                                                                                                                                                                                                                                                                                                                                                                                                  |                                                                                                                                   |             |      |            |
| <b>Mol. Formula</b>                                                                                                                                                                                                                                                                                                                                                                                                                                                                                                                                                                                                                                                                                                                                                                                                                             | C <sub>9</sub> H <sub>15</sub> NO                                                                                                 | <b>m.p.</b> | oil  |            |
| <b><sup>1</sup>H NMR (400 MHz, DMSO-d<sup>6</sup>)</b>                                                                                                                                                                                                                                                                                                                                                                                                                                                                                                                                                                                                                                                                                                                                                                                          | $\delta$ value:                                                                                                                   | No. H       | Mult | J value/Hz |
|                                                                                                                                                                                                                                                                                                                                                                                                                                                                                                                                                                                                                                                                                                                                                                                                                                                 | 7.34                                                                                                                              | 1           | m    |            |
|                                                                                                                                                                                                                                                                                                                                                                                                                                                                                                                                                                                                                                                                                                                                                                                                                                                 | 6.30                                                                                                                              | 1           | m    |            |
|                                                                                                                                                                                                                                                                                                                                                                                                                                                                                                                                                                                                                                                                                                                                                                                                                                                 | 6.16                                                                                                                              | 1           | d    | 3.3        |
|                                                                                                                                                                                                                                                                                                                                                                                                                                                                                                                                                                                                                                                                                                                                                                                                                                                 | 3.77                                                                                                                              | 2           | s    |            |
|                                                                                                                                                                                                                                                                                                                                                                                                                                                                                                                                                                                                                                                                                                                                                                                                                                                 | 2.60                                                                                                                              | 2           | t    | 7.2        |
|                                                                                                                                                                                                                                                                                                                                                                                                                                                                                                                                                                                                                                                                                                                                                                                                                                                 | 1.47                                                                                                                              | 2           | p    | 7.1        |
|                                                                                                                                                                                                                                                                                                                                                                                                                                                                                                                                                                                                                                                                                                                                                                                                                                                 | 1.33                                                                                                                              | 2           | h    | 7.1        |
| 0.90                                                                                                                                                                                                                                                                                                                                                                                                                                                                                                                                                                                                                                                                                                                                                                                                                                            | 3                                                                                                                                 | t           | 7.3  |            |
| <b><sup>13</sup>C NMR (100.6 Hz, DMSO-d<sup>6</sup>)</b> $\delta$ : 154.0, 141.7, 110.1, 106.7, 48.8, 46.2, 32.1, 20.4, 14.0.                                                                                                                                                                                                                                                                                                                                                                                                                                                                                                                                                                                                                                                                                                                   |                                                                                                                                   |             |      |            |
| <b>GC-EIMS (m/z, %):</b> 153(5), 110(37), 81(100).                                                                                                                                                                                                                                                                                                                                                                                                                                                                                                                                                                                                                                                                                                                                                                                              |                                                                                                                                   |             |      |            |

|                                                                                                                                                                                                                                                                                                                                                                                                                                                                                                                                                                                                                                                                                                                                                                                                                                                                                                                                                                                                                                                                                                                        |                                     |             |      |            |
|------------------------------------------------------------------------------------------------------------------------------------------------------------------------------------------------------------------------------------------------------------------------------------------------------------------------------------------------------------------------------------------------------------------------------------------------------------------------------------------------------------------------------------------------------------------------------------------------------------------------------------------------------------------------------------------------------------------------------------------------------------------------------------------------------------------------------------------------------------------------------------------------------------------------------------------------------------------------------------------------------------------------------------------------------------------------------------------------------------------------|-------------------------------------|-------------|------|------------|
| <b>Chem. Name</b>                                                                                                                                                                                                                                                                                                                                                                                                                                                                                                                                                                                                                                                                                                                                                                                                                                                                                                                                                                                                                                                                                                      | Clobenzorex ( <b>3v</b> )           |             |      |            |
| <b>Lit. Ref.</b>                                                                                                                                                                                                                                                                                                                                                                                                                                                                                                                                                                                                                                                                                                                                                                                                                                                                                                                                                                                                                                                                                                       |                                     |             |      |            |
| <p style="text-align: center;"> <chem>Clc1ccccc1C=O</chem> (<b>1n</b>) + <chem>CC(N)Cc1ccccc1</chem> (<b>2j</b>) <math>\xrightarrow[\text{CH}_3\text{CN}:\text{H}_2\text{O (az.) 1M, 300mA, r.t., 2.75F/mol}]{\text{C(-) - Al(+), Et}_4\text{NBr 1 eq}}</math> <chem>Clc1ccc(cc1)NC(C)Cc2ccccc2</chem> (<b>3v</b>)<br/> <b>MW: 259.78</b> </p>                                                                                                                                                                                                                                                                                                                                                                                                                                                                                                                                                                                                                                                                                                                                                                         |                                     |             |      |            |
| <b>Method:</b>                                                                                                                                                                                                                                                                                                                                                                                                                                                                                                                                                                                                                                                                                                                                                                                                                                                                                                                                                                                                                                                                                                         |                                     |             |      |            |
| <p>Prepared according to general procedure A: in a 8mL vial equipped with a magnetic stirrer and a two electrodes system (aluminium anode and graphite cathode) tetraethylammonium bromide (627.45 mg, 3 mmol), 2-chlorobenzaldehyde <b>1n</b> (421.71 mg, 3 mmol), 1-phenylpropan-2-amine <b>2j</b> (405.63 mg, 3 mmol) and 3 mL of azeotropic mixture of acetonitrile : water (84% w/w acetonitrile) were consecutively added and the resulting mixture was electrolyzed in CCE at 300 mA under stirring at room temperature until 2.75 F/mol of current were passed (ca. 45 minutes). After reaction completion the mixture was concentrated under reduced pressure. The residue was diluted in 10 mL of ethyl acetate, then it was filtered on cotton and concentrated under reduced pressure, giving the product <b>3v</b> as a yellow oil. The hydrochloride salt is obtained by adding HCl(aq.) (2 eq.). Remove water under reduced pressure, then add a mixture of ethyl acetate : petroleum ether (1 : 9) in order to obtain hydrochloride salt product <b>3v</b> (693.2 mg, 78% yield) as white crystal.</p> |                                     |             |      |            |
| <b>Elemental analysis:</b> Calc: C: 73.98; H: 6.98; Cl: 13.65; N: 5.39; Found: C: 73.99; H: 6.98; Cl: 13.66; N: 5.37                                                                                                                                                                                                                                                                                                                                                                                                                                                                                                                                                                                                                                                                                                                                                                                                                                                                                                                                                                                                   |                                     |             |      |            |
| <b>Mol. Formula</b>                                                                                                                                                                                                                                                                                                                                                                                                                                                                                                                                                                                                                                                                                                                                                                                                                                                                                                                                                                                                                                                                                                    | C <sub>16</sub> H <sub>18</sub> ClN | <b>m.p.</b> | oil  |            |
| <b><sup>1</sup>H NMR (400 MHz, MeOH-d<sup>4</sup>)</b>                                                                                                                                                                                                                                                                                                                                                                                                                                                                                                                                                                                                                                                                                                                                                                                                                                                                                                                                                                                                                                                                 | $\delta$ value:                     | No. H       | Mult | J value/Hz |
|                                                                                                                                                                                                                                                                                                                                                                                                                                                                                                                                                                                                                                                                                                                                                                                                                                                                                                                                                                                                                                                                                                                        | 7.78                                | 1           | dd   | 7.1, 2.1   |
|                                                                                                                                                                                                                                                                                                                                                                                                                                                                                                                                                                                                                                                                                                                                                                                                                                                                                                                                                                                                                                                                                                                        | 7.56                                | 1           | dd   | 7.5, 1.6   |
|                                                                                                                                                                                                                                                                                                                                                                                                                                                                                                                                                                                                                                                                                                                                                                                                                                                                                                                                                                                                                                                                                                                        | 7.47                                | 2           | m    |            |
|                                                                                                                                                                                                                                                                                                                                                                                                                                                                                                                                                                                                                                                                                                                                                                                                                                                                                                                                                                                                                                                                                                                        | 7.35                                | 5           | m    |            |
|                                                                                                                                                                                                                                                                                                                                                                                                                                                                                                                                                                                                                                                                                                                                                                                                                                                                                                                                                                                                                                                                                                                        | 4.50                                | 2           | s    |            |
|                                                                                                                                                                                                                                                                                                                                                                                                                                                                                                                                                                                                                                                                                                                                                                                                                                                                                                                                                                                                                                                                                                                        | 3.69                                | 1           | m    |            |
|                                                                                                                                                                                                                                                                                                                                                                                                                                                                                                                                                                                                                                                                                                                                                                                                                                                                                                                                                                                                                                                                                                                        | 3.42                                | 1           | dd   | 13.1, 4.0  |
|                                                                                                                                                                                                                                                                                                                                                                                                                                                                                                                                                                                                                                                                                                                                                                                                                                                                                                                                                                                                                                                                                                                        | 2.85                                | 1           | dd   | 13.1, 10.4 |
| 1.36                                                                                                                                                                                                                                                                                                                                                                                                                                                                                                                                                                                                                                                                                                                                                                                                                                                                                                                                                                                                                                                                                                                   | 3                                   | d           | 6.3  |            |
| <b><sup>13</sup>C NMR (100.6 Hz, MeOH-d<sup>4</sup>)</b> $\delta$ : 136.1, 134.5, 132.2, 131.2, 129.8, 129.4, 129.1, 128.6, 127.7, 127.0, 56.4, 45.6, 38.7, 14.7.                                                                                                                                                                                                                                                                                                                                                                                                                                                                                                                                                                                                                                                                                                                                                                                                                                                                                                                                                      |                                     |             |      |            |
| <b>GC-EIMS (m/z, %):</b> 170(21), 168(78), 127(30), 125(100), 91(29), 89(26).                                                                                                                                                                                                                                                                                                                                                                                                                                                                                                                                                                                                                                                                                                                                                                                                                                                                                                                                                                                                                                          |                                     |             |      |            |

## 8. References

- 1 J. Osorio-Tejada, F. Ferlin, L. Vaccaro and V. Hessel, *Green Chem.*, 2022, **24**, 325–337.
- 2 G. Wernet, S. Hellweg and K. Hungerbühler, *Int. J. Life Cycle Assess.*, 2012, **17**, 720–728.
- 3 R. Hischer, S. Hellweg, C. Capello and A. Primas, *Int. J. Life Cycle Assess.*, 2005, **10**, 59–67.
- 4 D. G, Ecoinvent Rep. No. 13. Dübend. Swiss Cent. Life Cycle Invent.
- 5 M. A. J. Huijbregts, Z. J. N. Steinmann, P. M. F. Elshout, G. Stam, F. Verones, M. Vieira, M. Zijk, A. Hollander and R. van Zelm, *Int. J. Life Cycle Assess.*, 2017, **22**, 138–147.

## 9. Copies of the NMR spectra

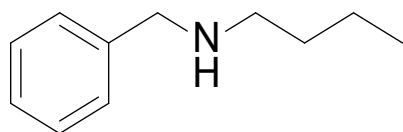

*N*-benzylbutan-1-amine  
**3a**

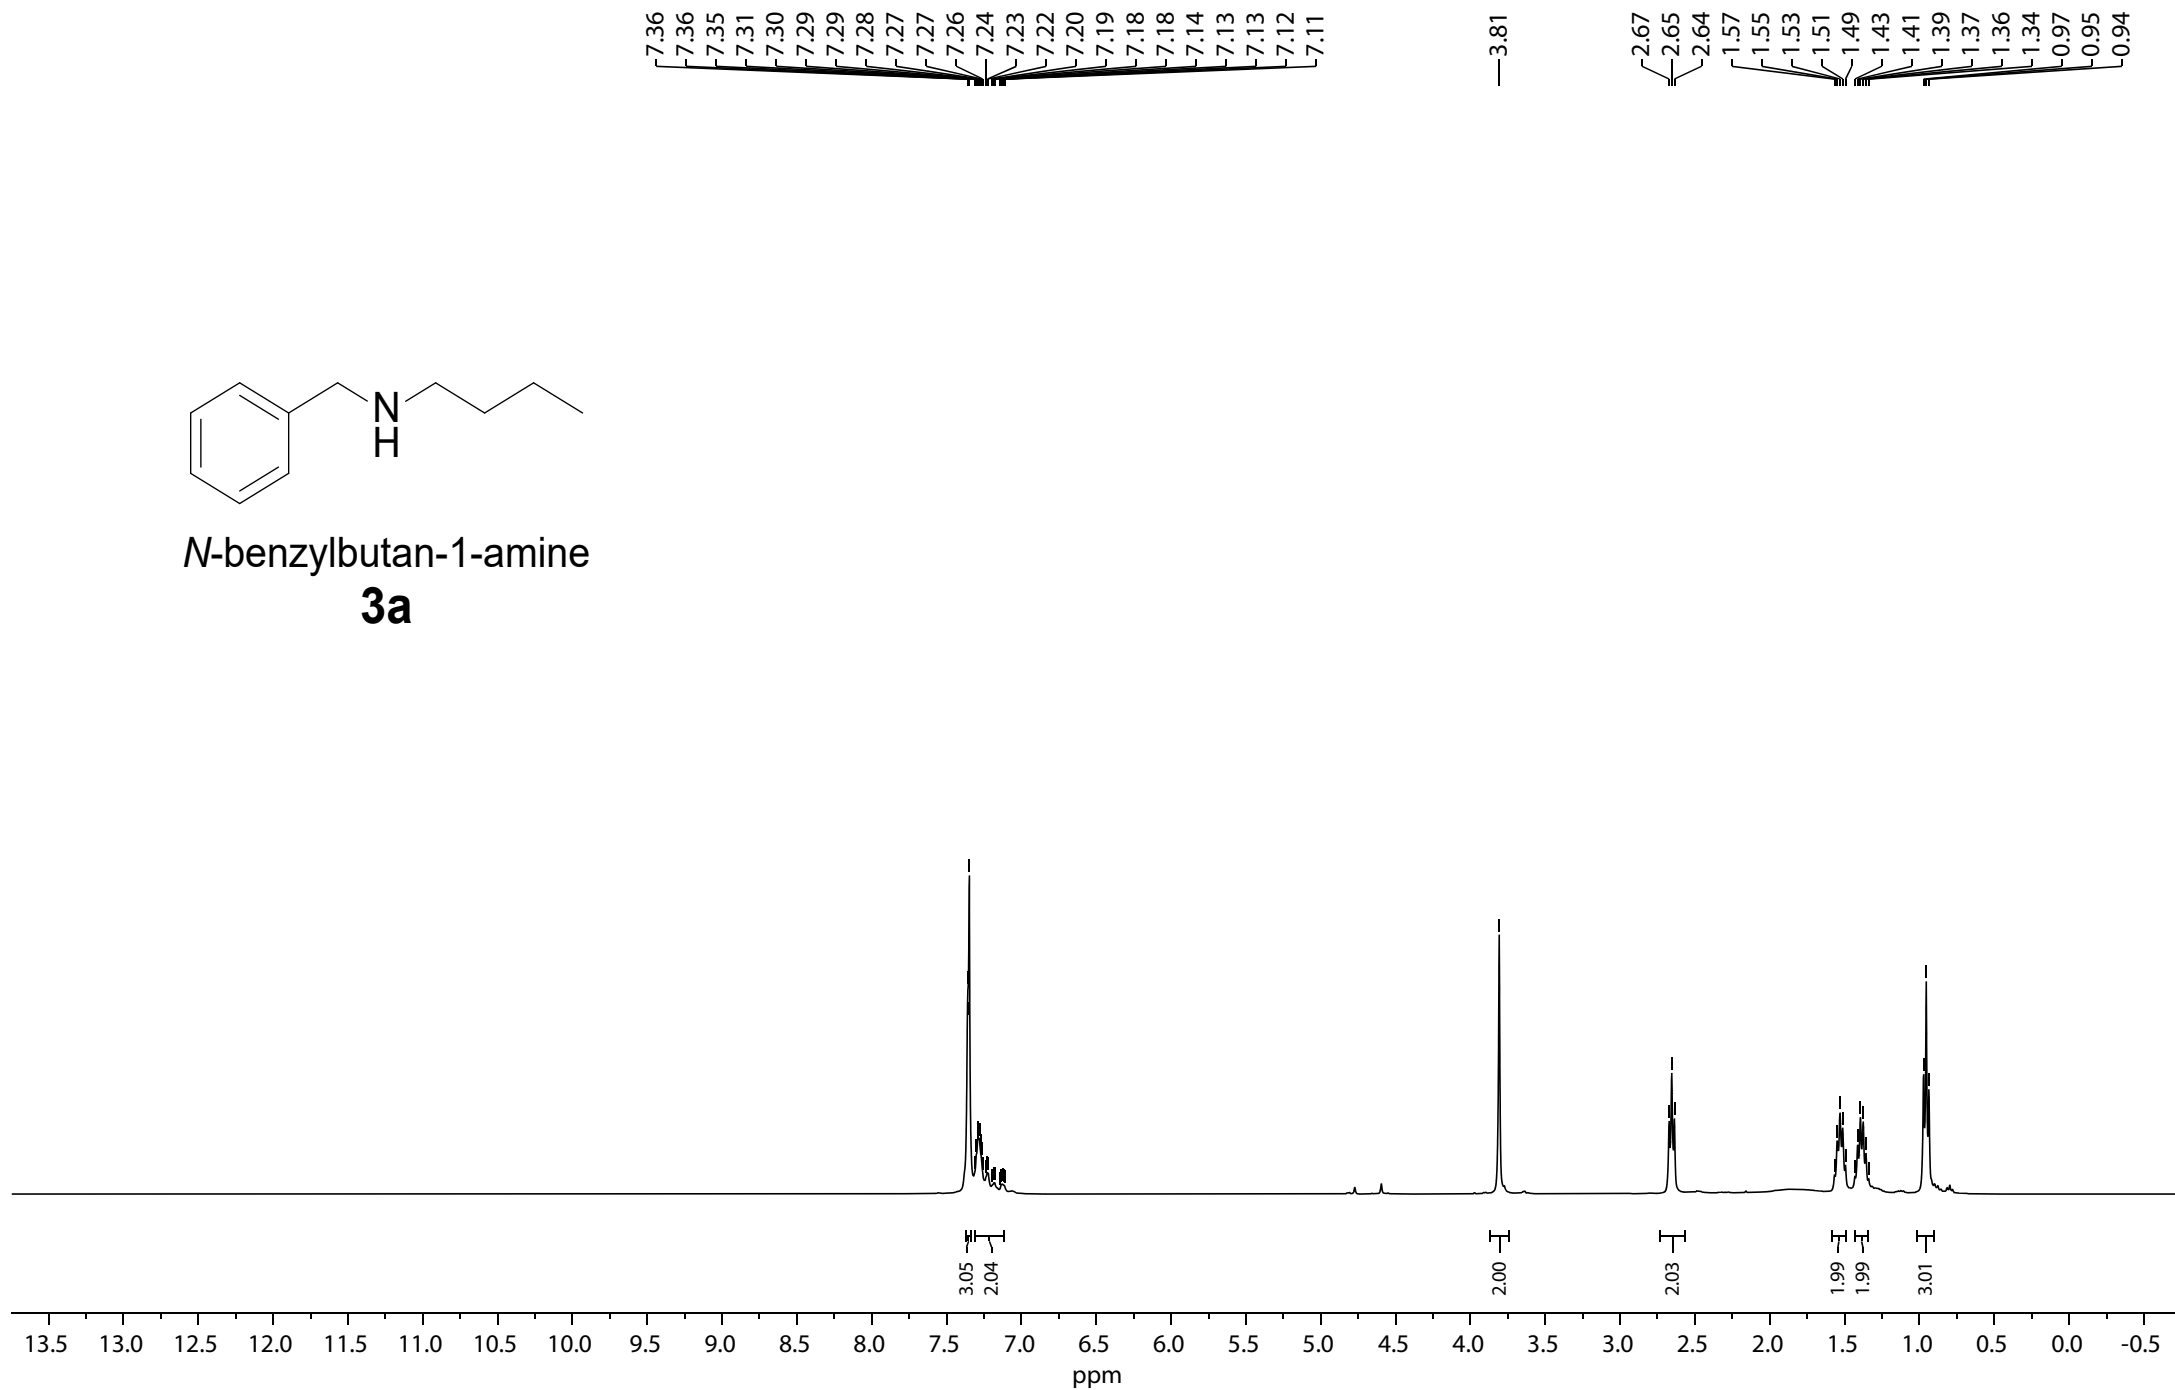

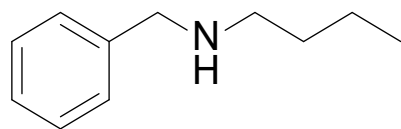

*N*-benzylbutan-1-amine  
**3a**

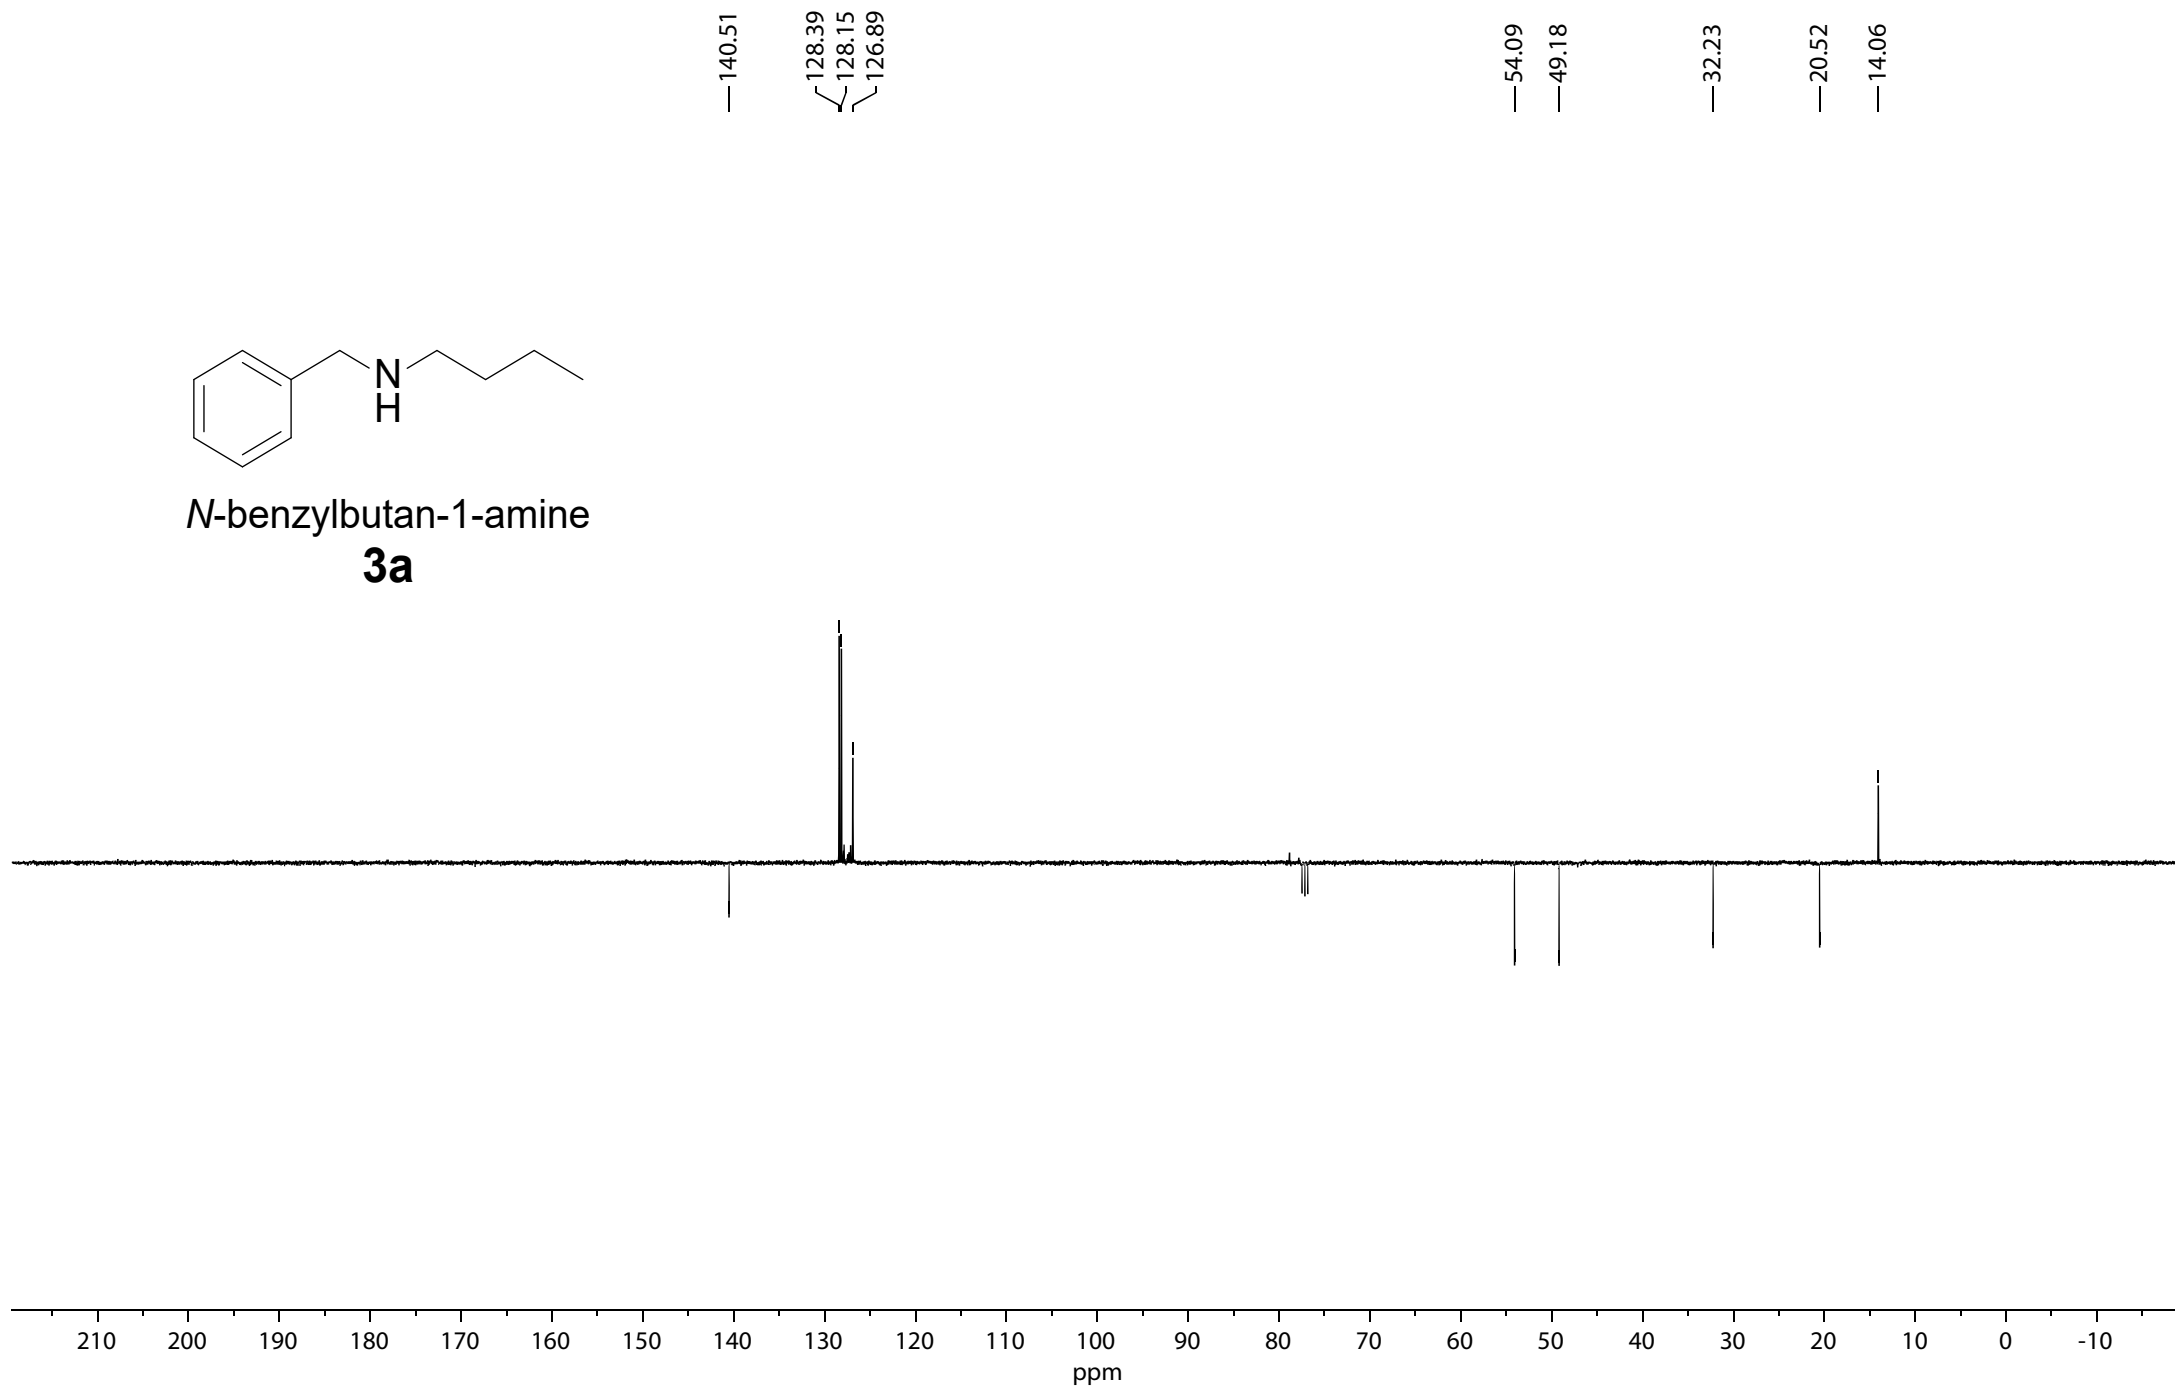

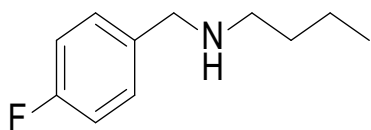

*N*-(4-fluorobenzyl)butan-1-amine  
**3b**

7.33  
7.31  
7.31  
7.29  
7.05  
7.02  
7.00

3.78

2.66  
2.64  
2.62  
1.79  
1.56  
1.54  
1.52  
1.50  
1.48  
1.41  
1.40  
1.38  
1.36  
1.34  
1.32  
0.95  
0.93  
0.91

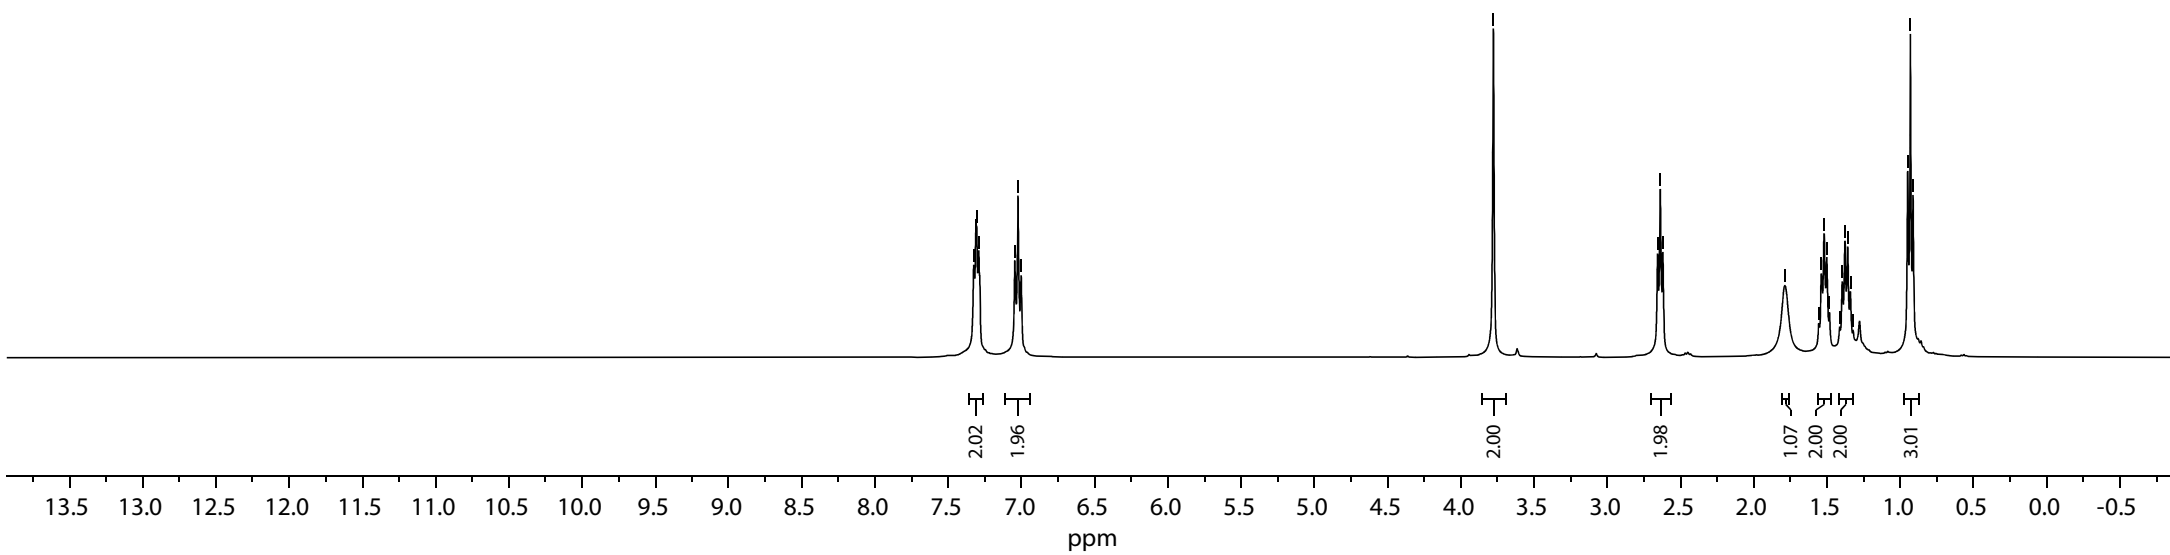



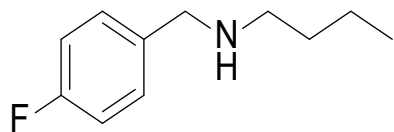

*N*-(4-fluorobenzyl)butan-1-amine  
**3b**

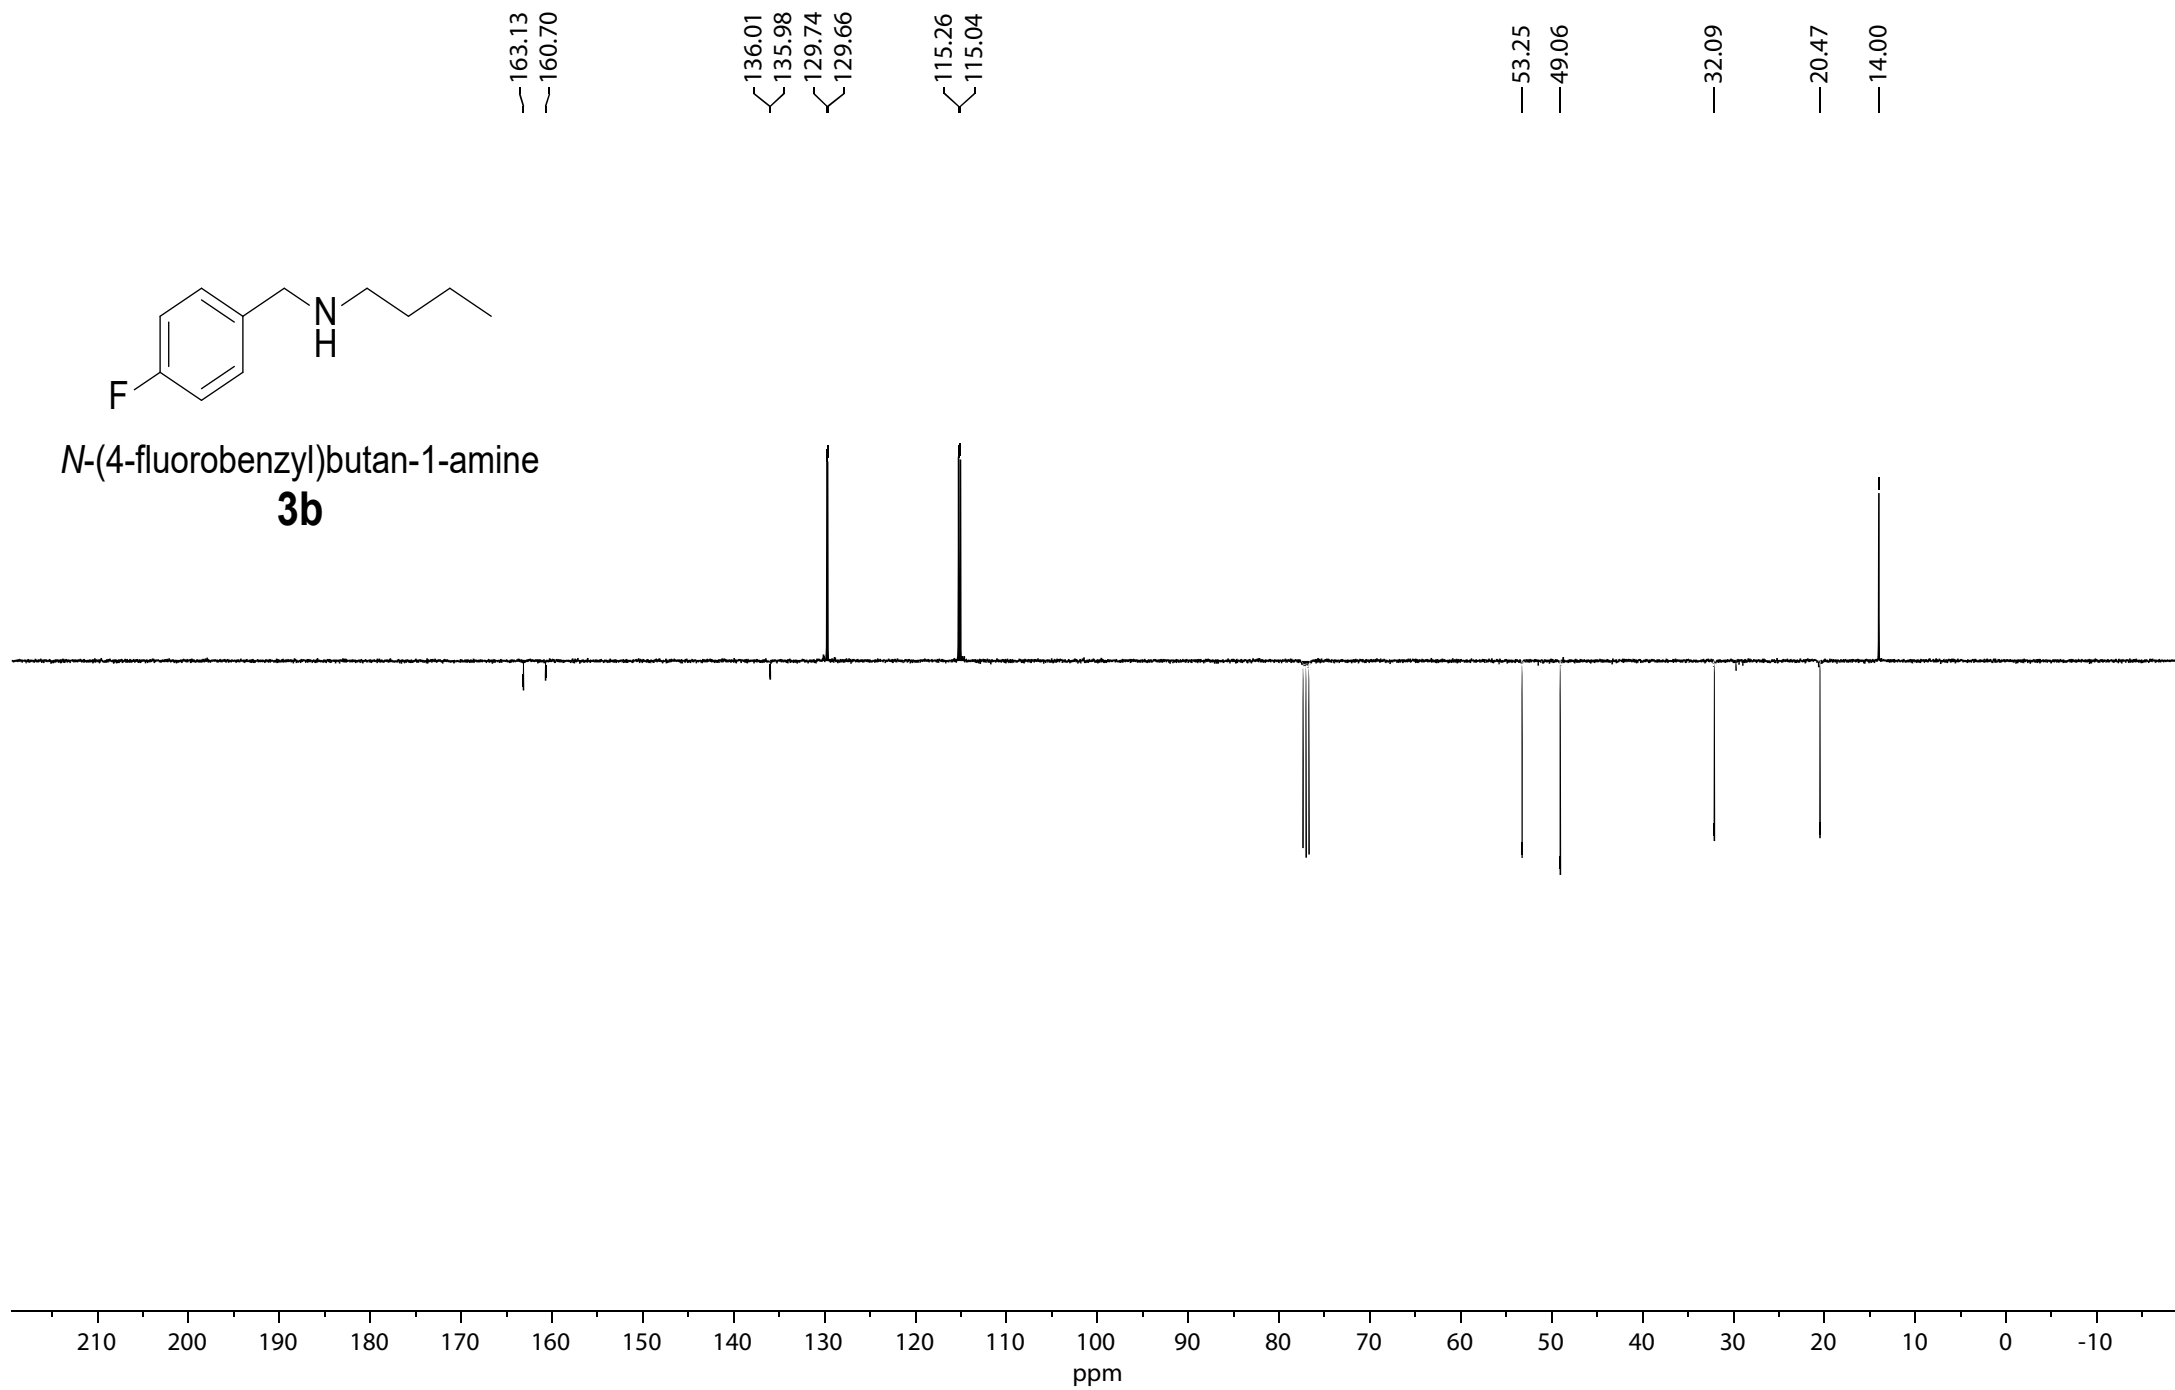

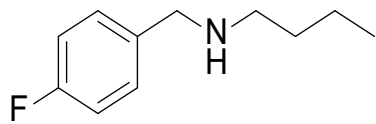

*N*-(4-fluorobenzyl)butan-1-amine  
**3b**

—116.14

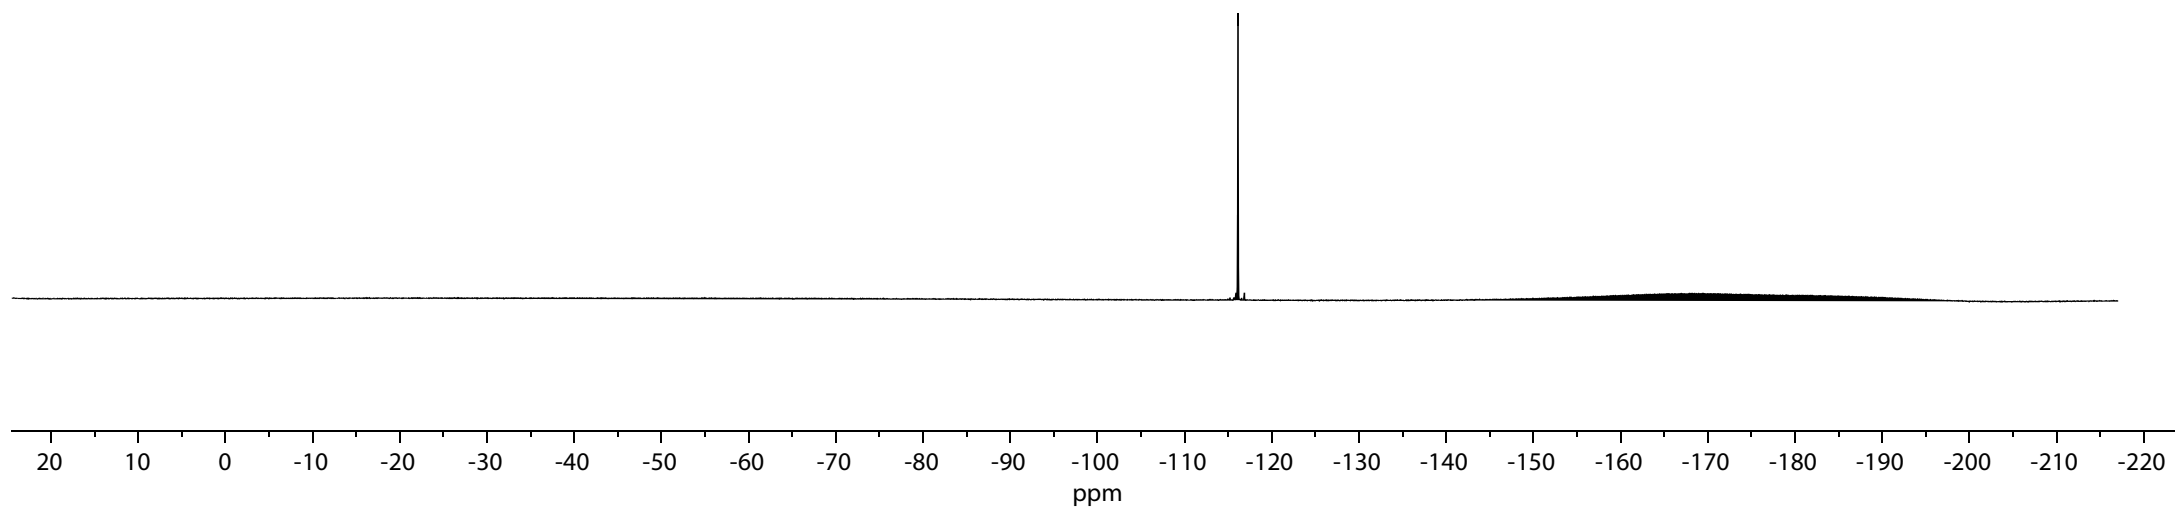

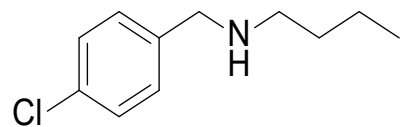

*N*-(4-chlorobenzyl)butan-1-amine  
**3c**

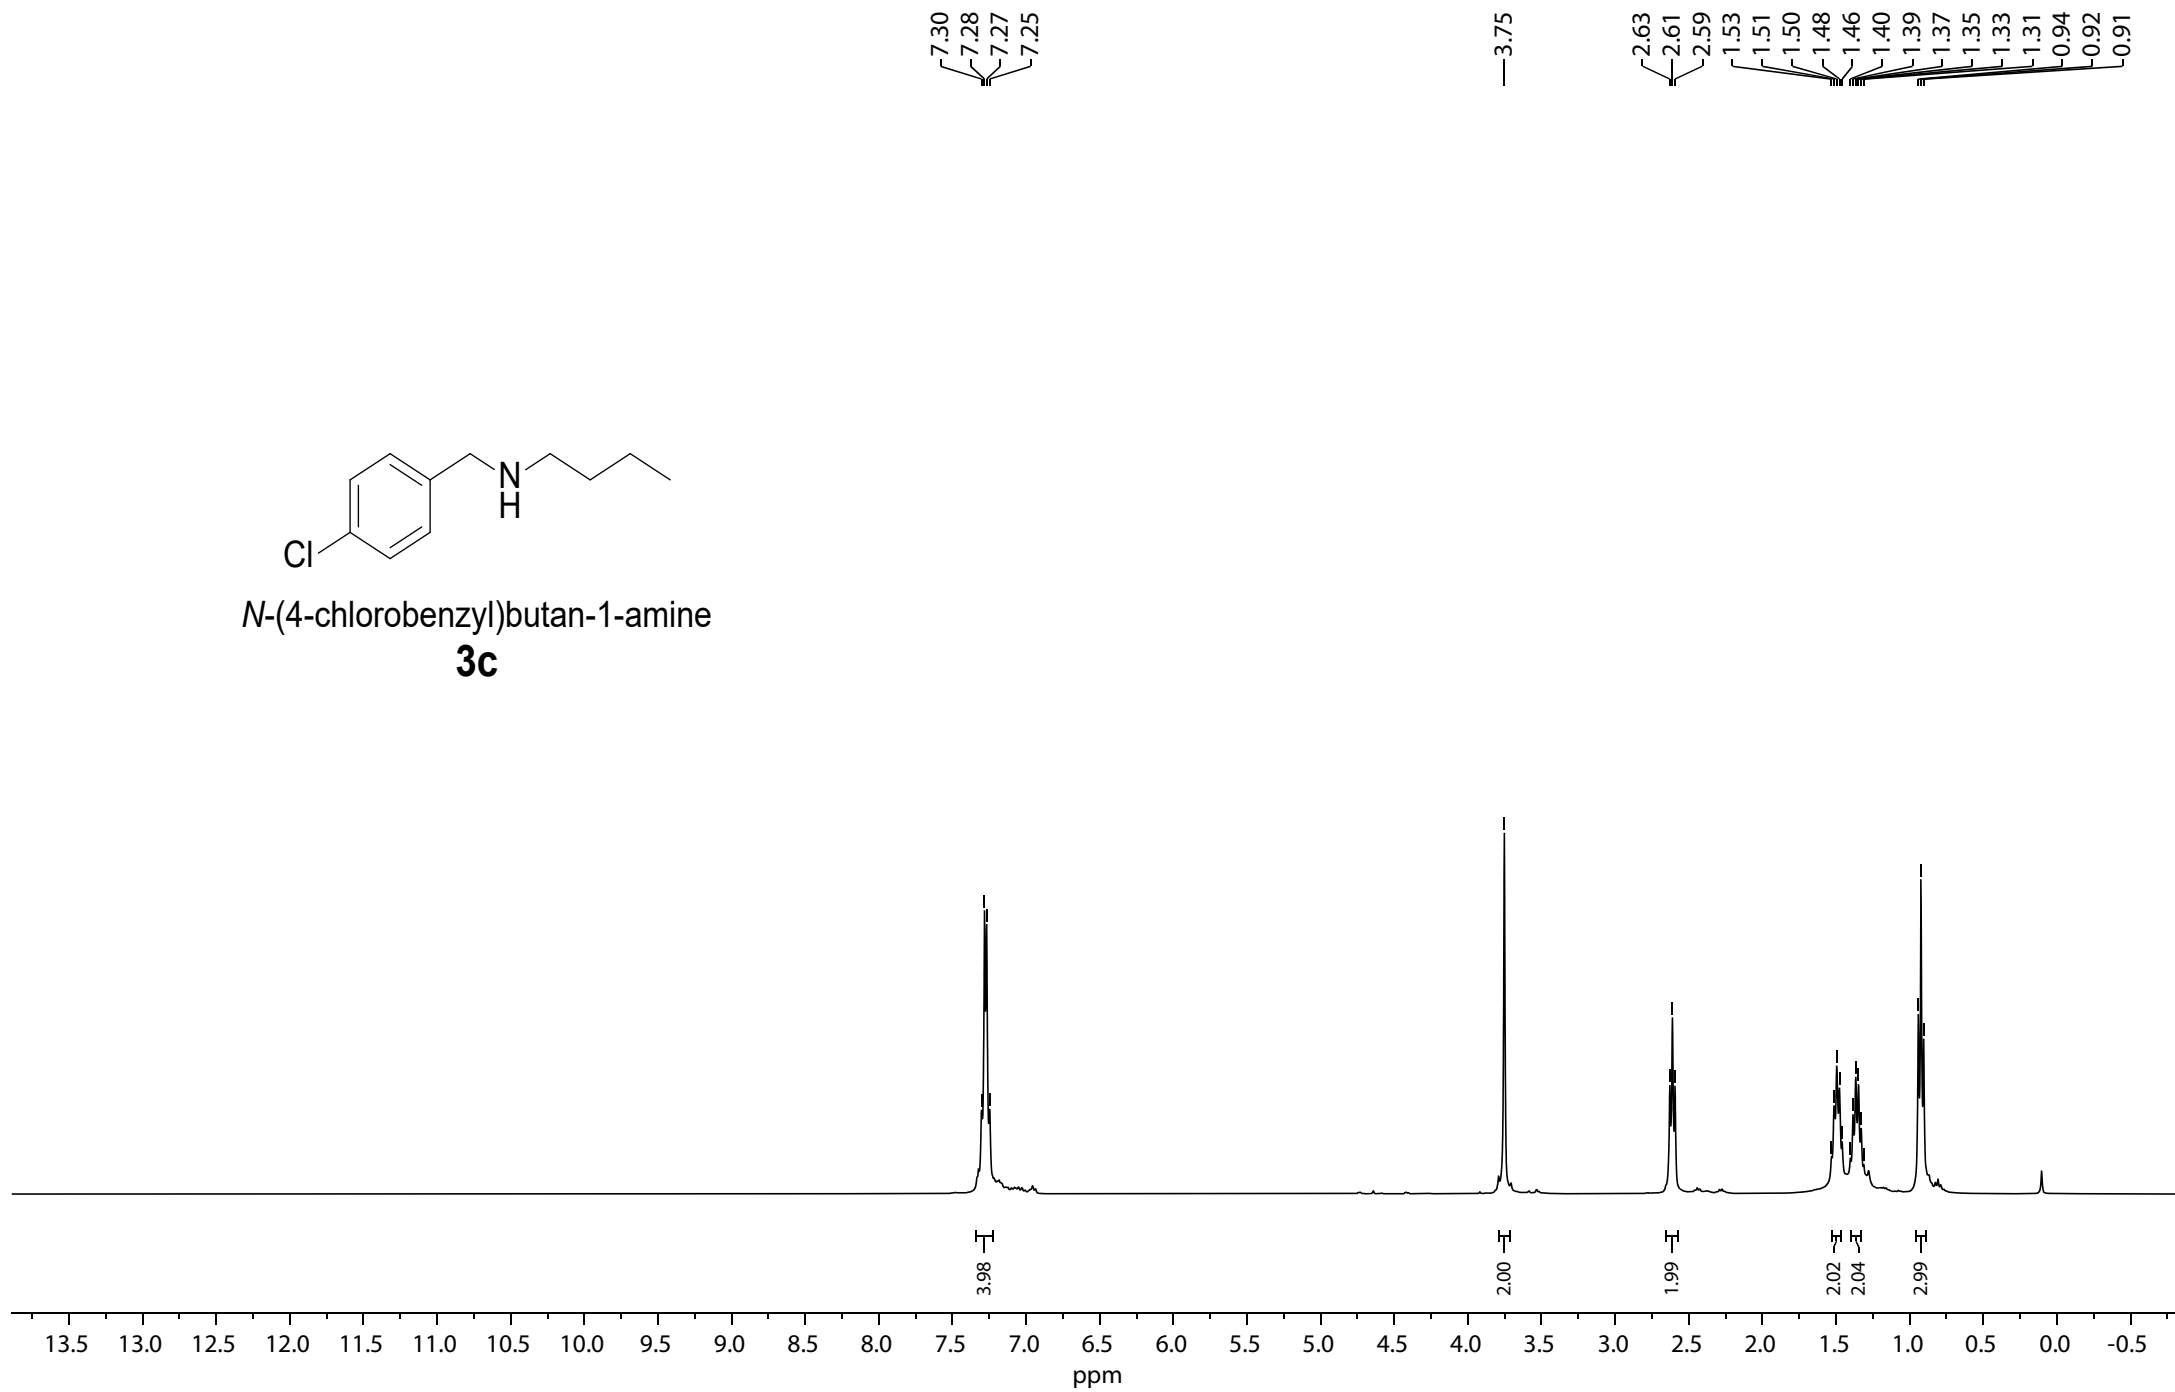

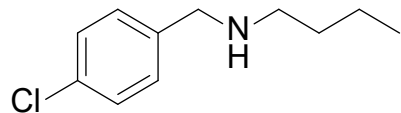

*N*-(4-chlorobenzyl)butan-1-amine  
**3c**

139.08  
132.50  
129.42  
128.44

53.32  
49.13

32.22

20.47

14.02

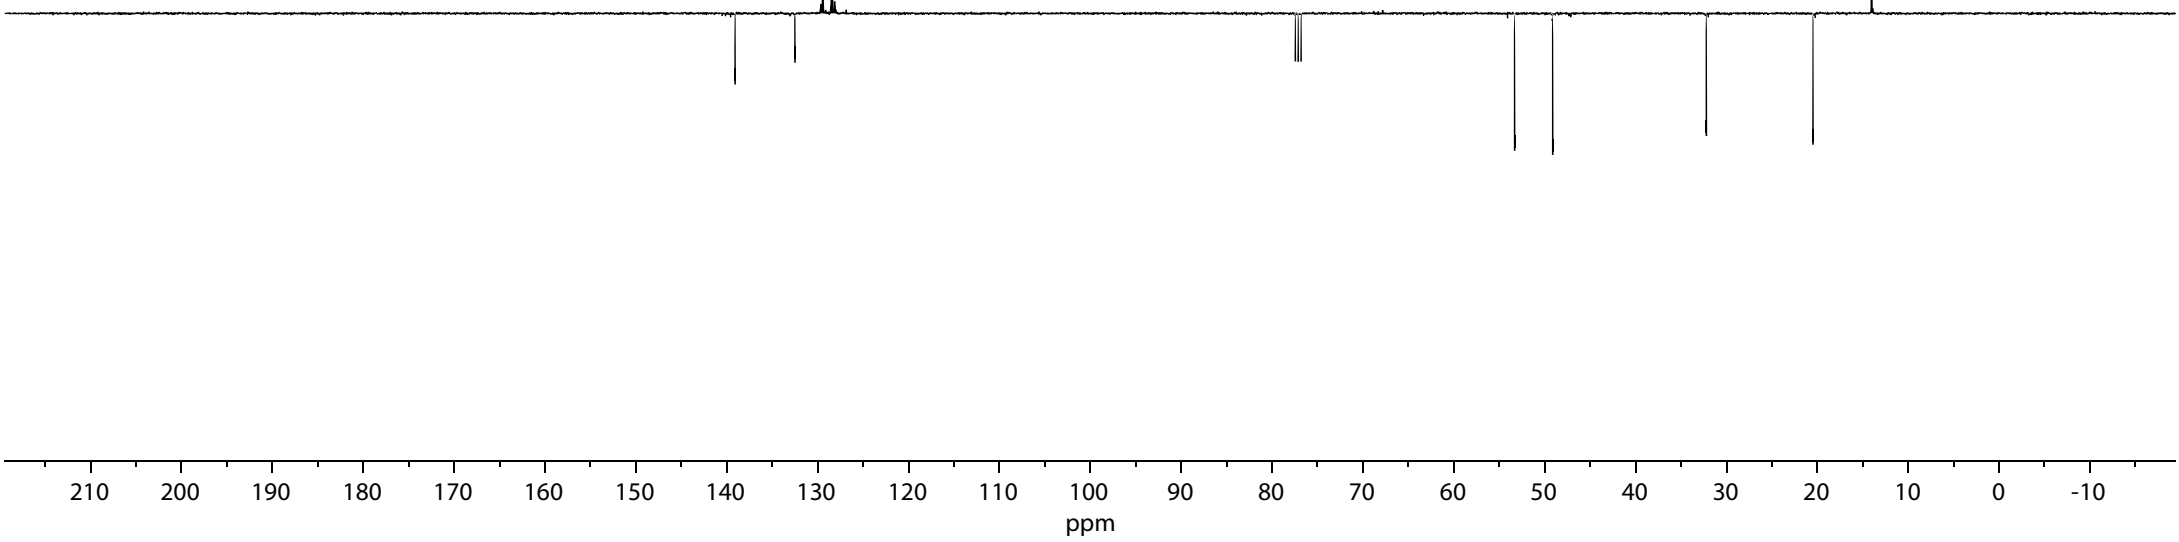

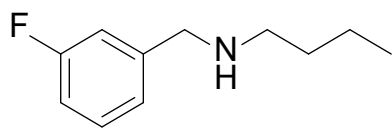

*N*-(3-fluorobenzyl)butan-1-amine  
**3d**

7.29  
7.28  
7.26  
7.26  
7.24  
7.10  
7.07  
7.07  
7.05  
7.04  
6.95  
6.95  
6.93  
6.93  
6.91  
6.90

3.77

2.63  
2.61  
2.60  
1.53  
1.52  
1.50  
1.48  
1.46  
1.41  
1.39  
1.37  
1.35  
1.33  
1.31  
0.94  
0.92  
0.91

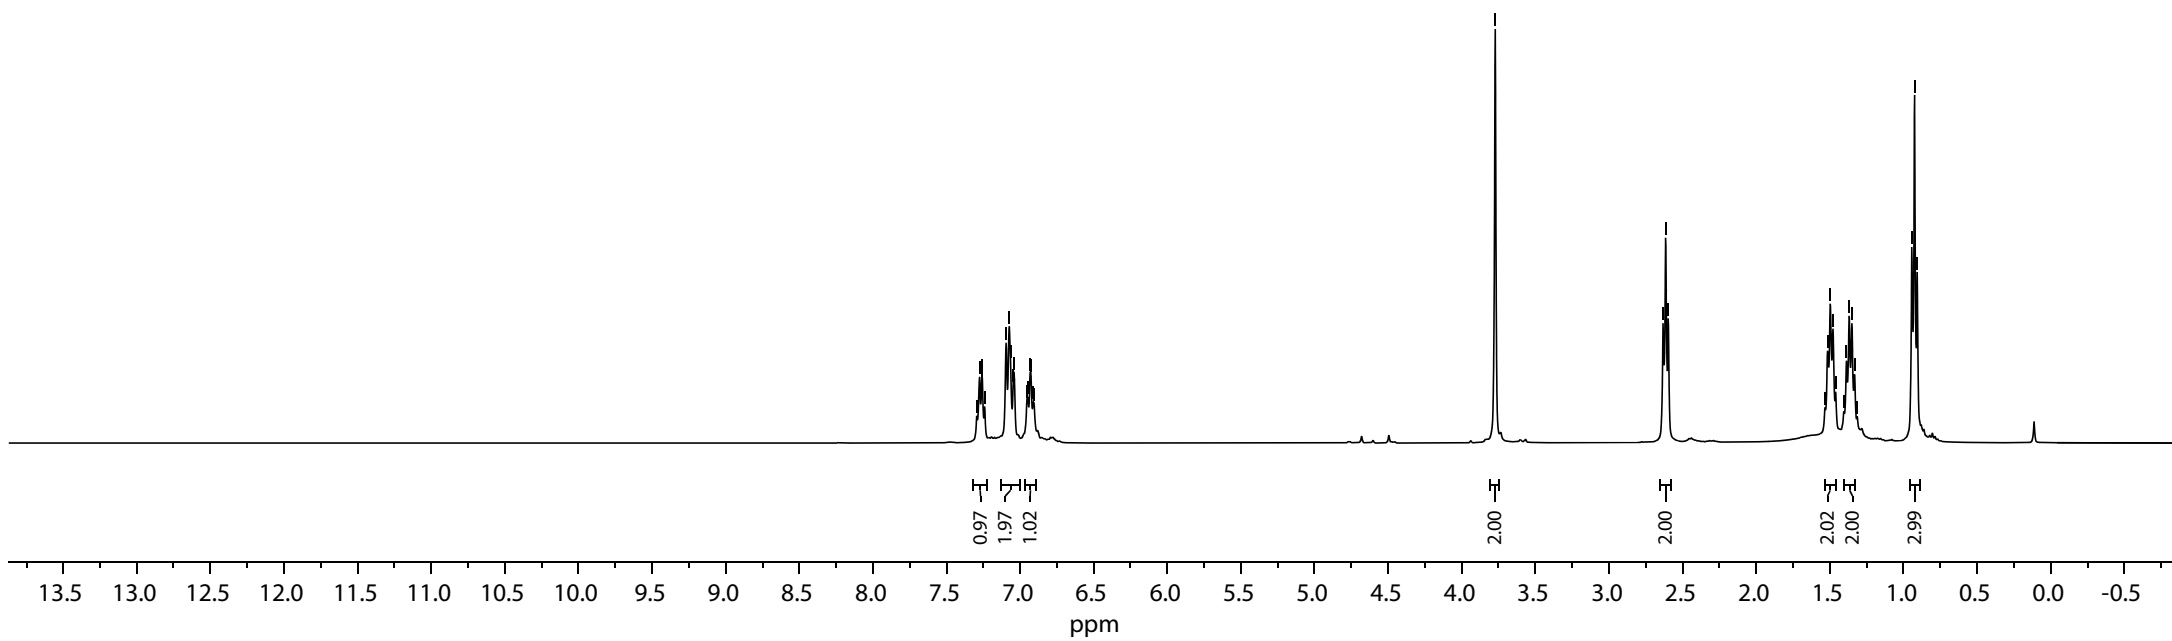

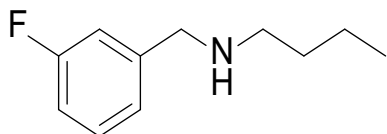

*N*-(3-fluorobenzyl)butan-1-amine

**3d**

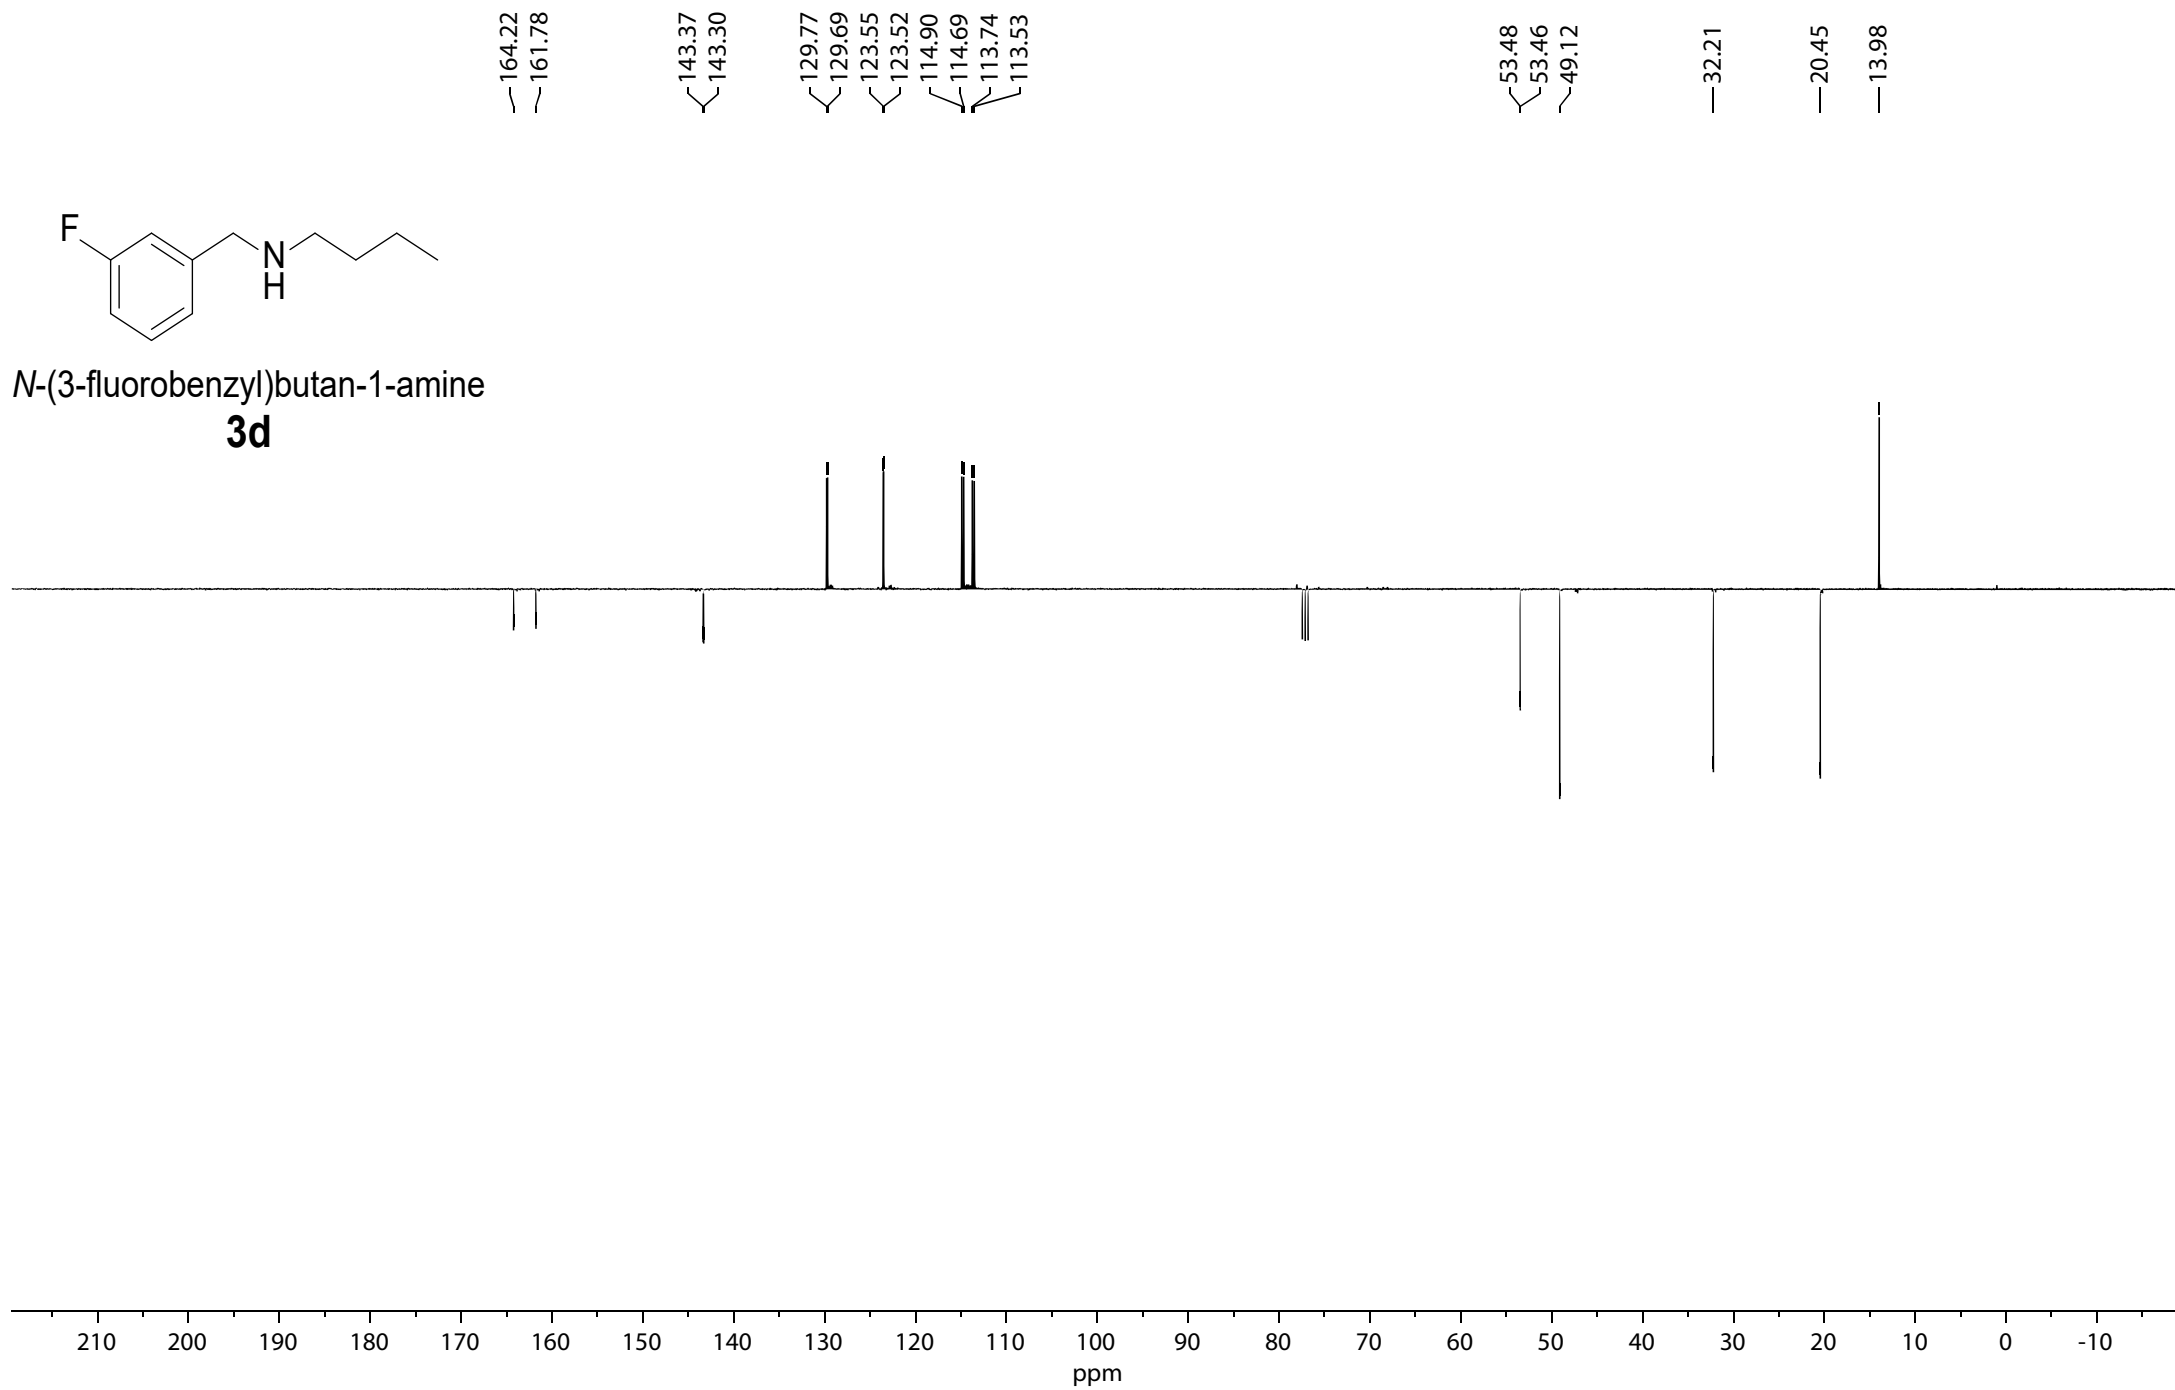

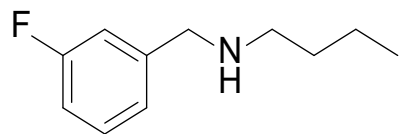

*N*-(3-fluorobenzyl)butan-1-amine  
**3d**

—113.59

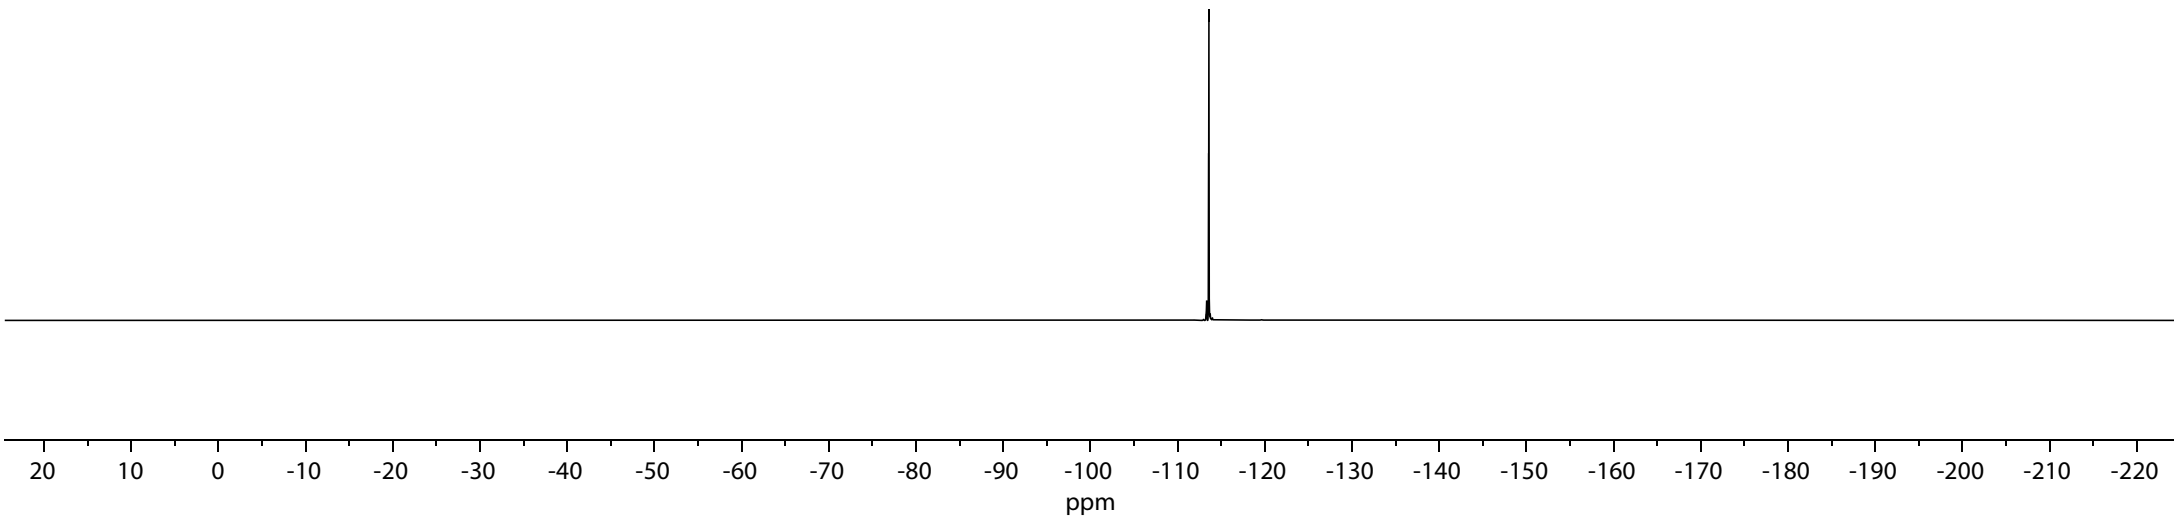

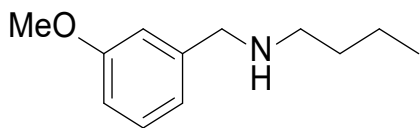

*N*-(3-methoxybenzyl)butan-1-amine  
**3e**

7.22  
7.20  
7.18  
6.88  
6.87  
6.87  
6.86  
6.78  
6.77  
6.75  
6.75

3.76  
3.73

2.61  
2.59  
2.58

1.51  
1.49  
1.49  
1.47  
1.45  
1.45  
1.44  
1.37  
1.36  
1.34  
1.32  
1.30  
0.91  
0.90  
0.88

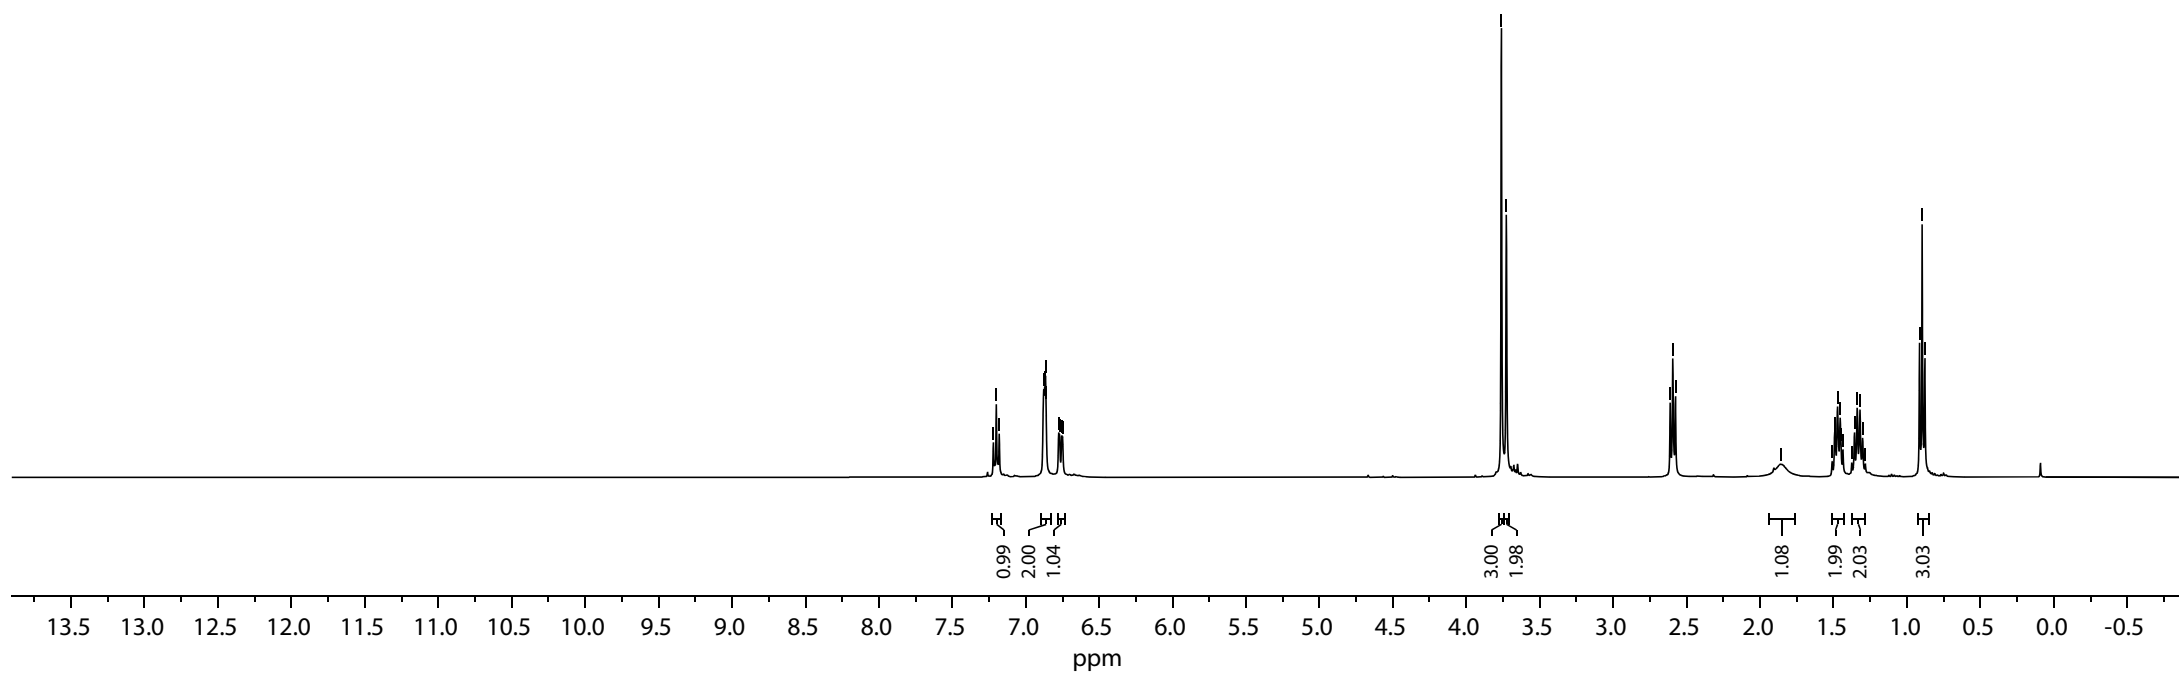



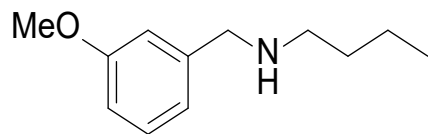

*N*-(3-methoxybenzyl)butan-1-amine

**3e**

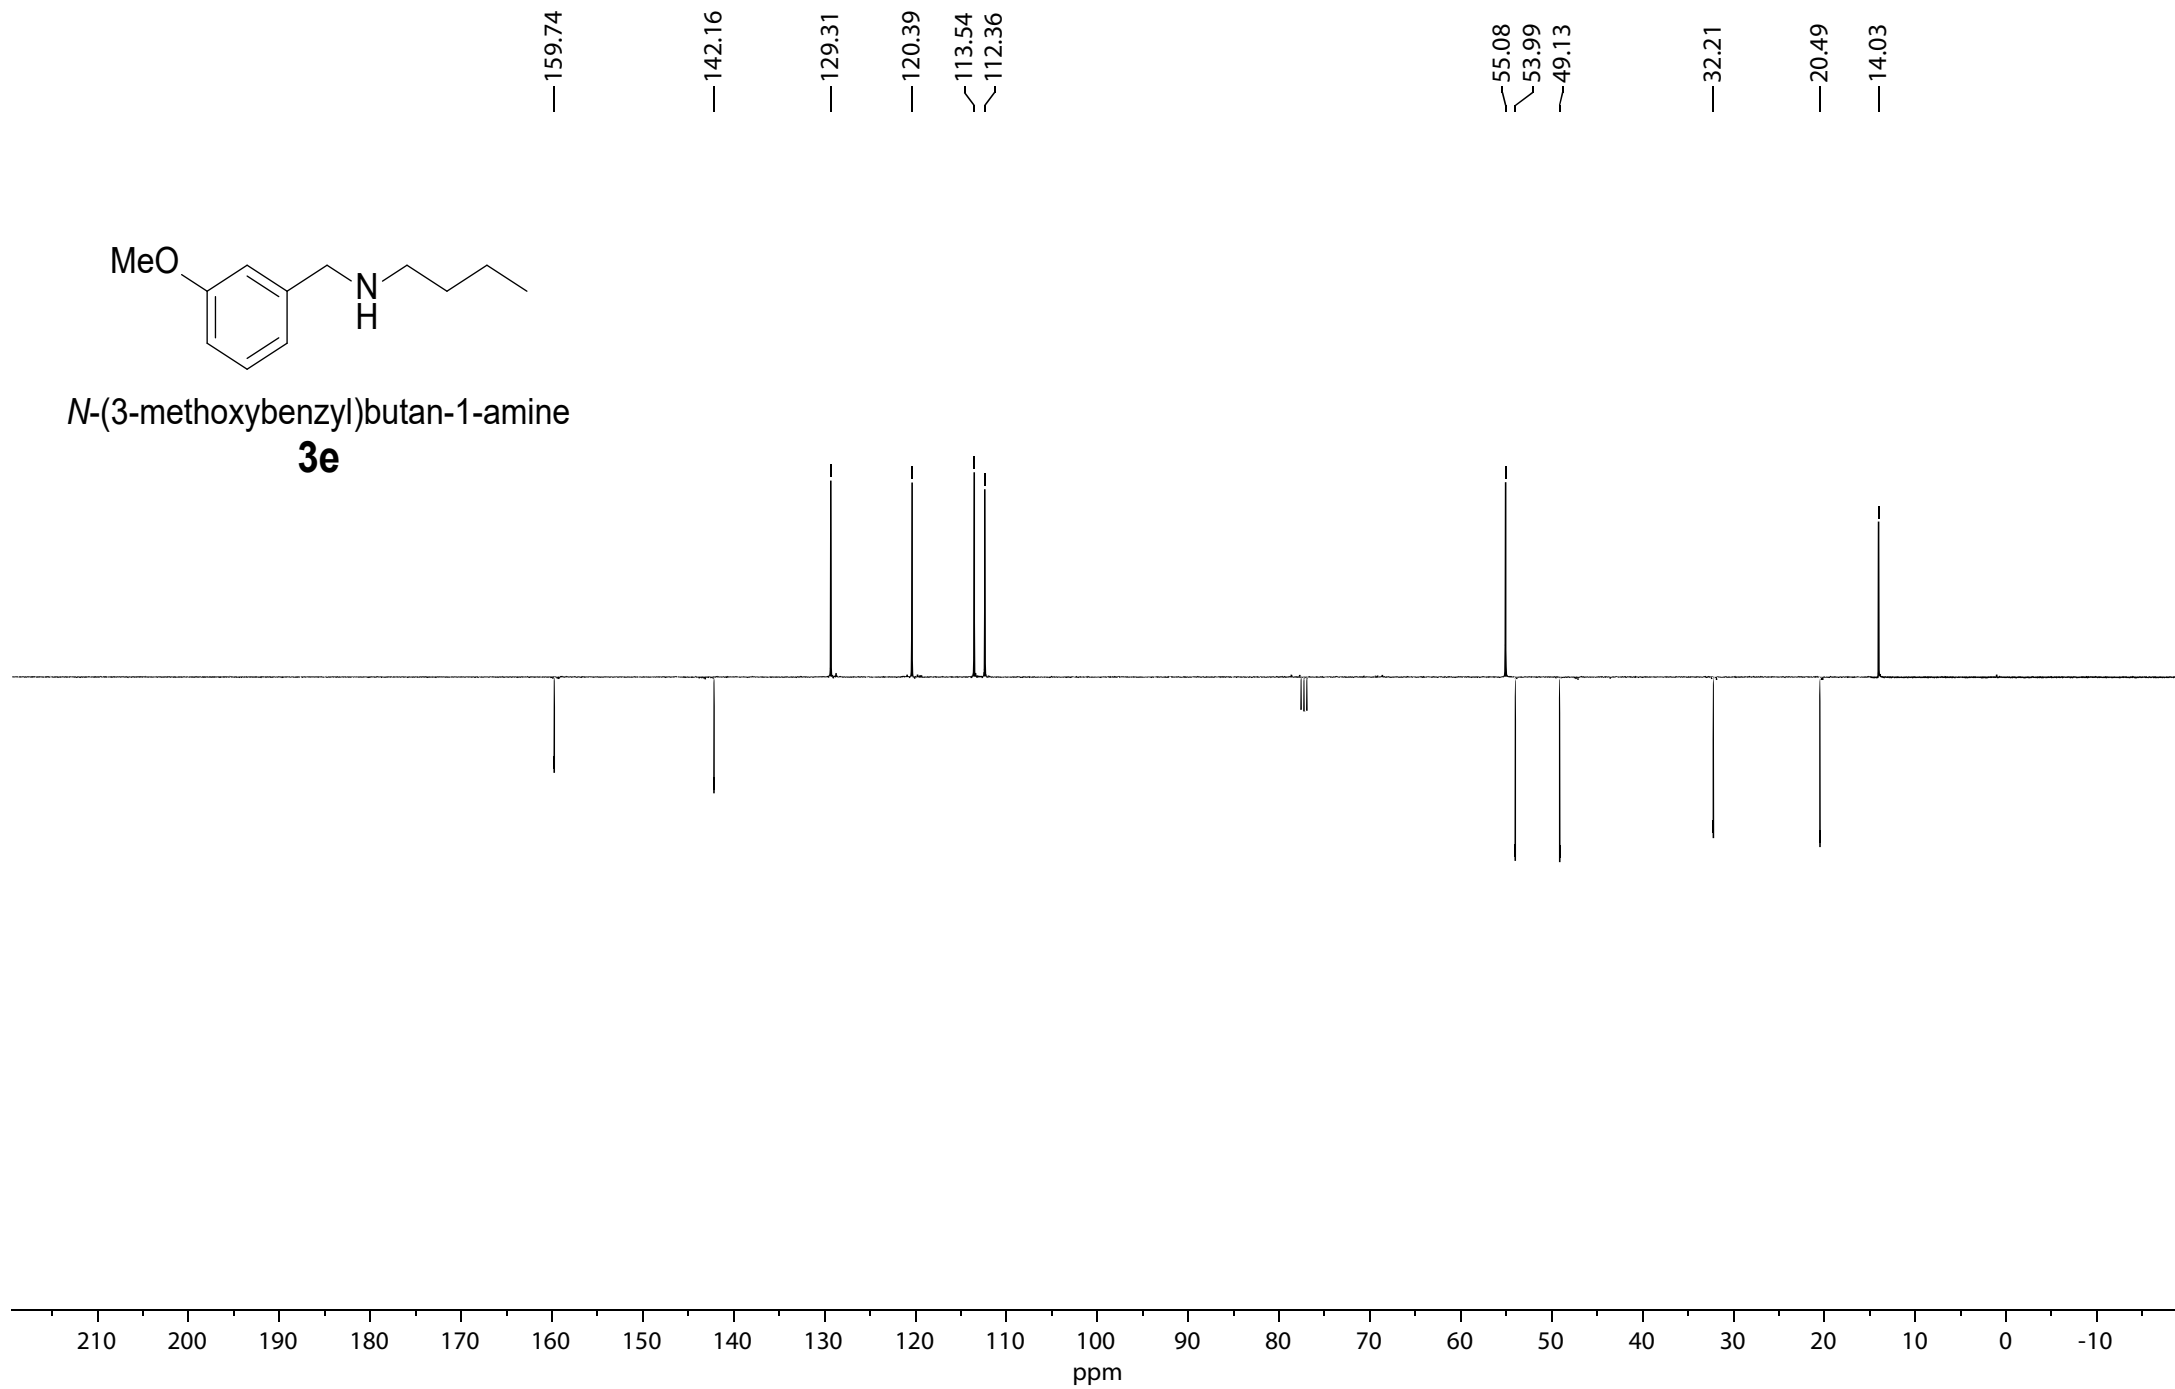

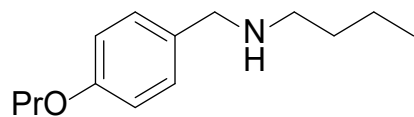

*N*-(4-propoxybenzyl)butan-1-amine  
**3f**

7.24  
7.22  
6.88  
6.86

3.94  
3.92  
3.90  
3.72  
2.64  
2.62  
2.60  
1.86  
1.84  
1.83  
1.81  
1.79  
1.77  
1.54  
1.52  
1.50  
1.48  
1.48  
1.46  
1.40  
1.38  
1.36  
1.35  
1.33  
1.31  
1.07  
1.05  
1.03  
0.95  
0.93  
0.91

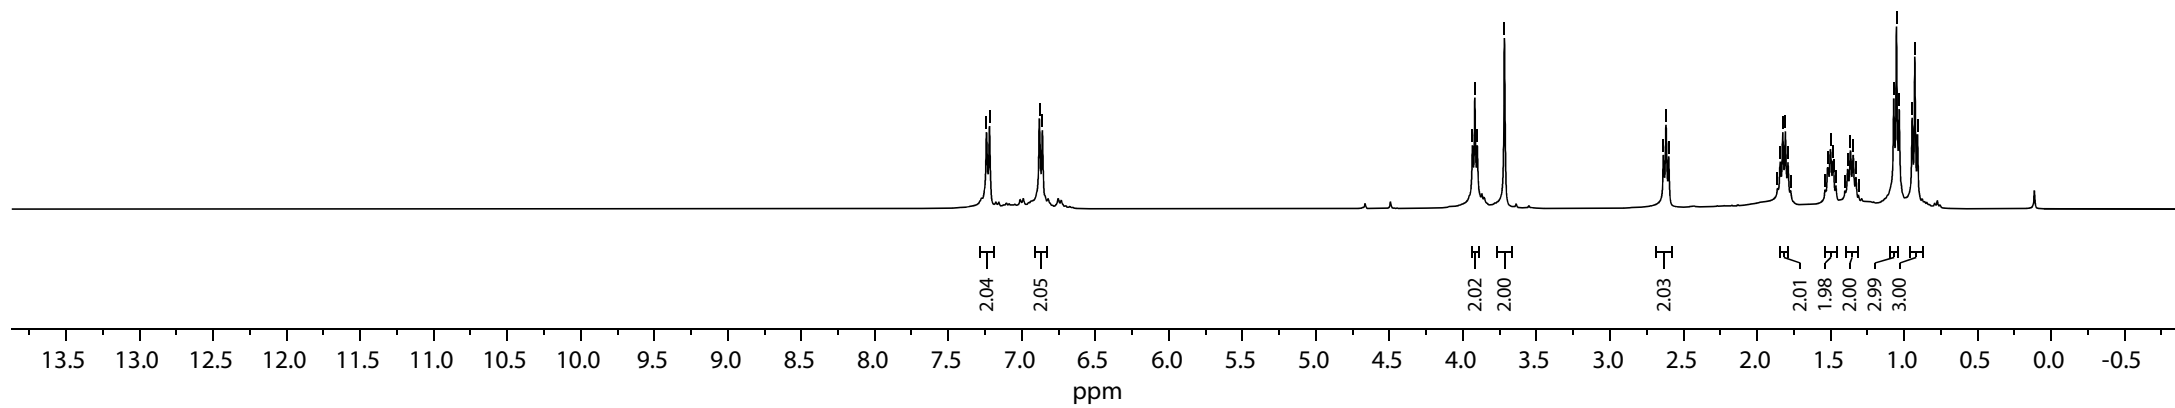

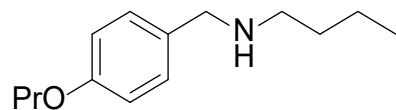

*N*-(4-propoxybenzyl)butan-1-amine

**3f**

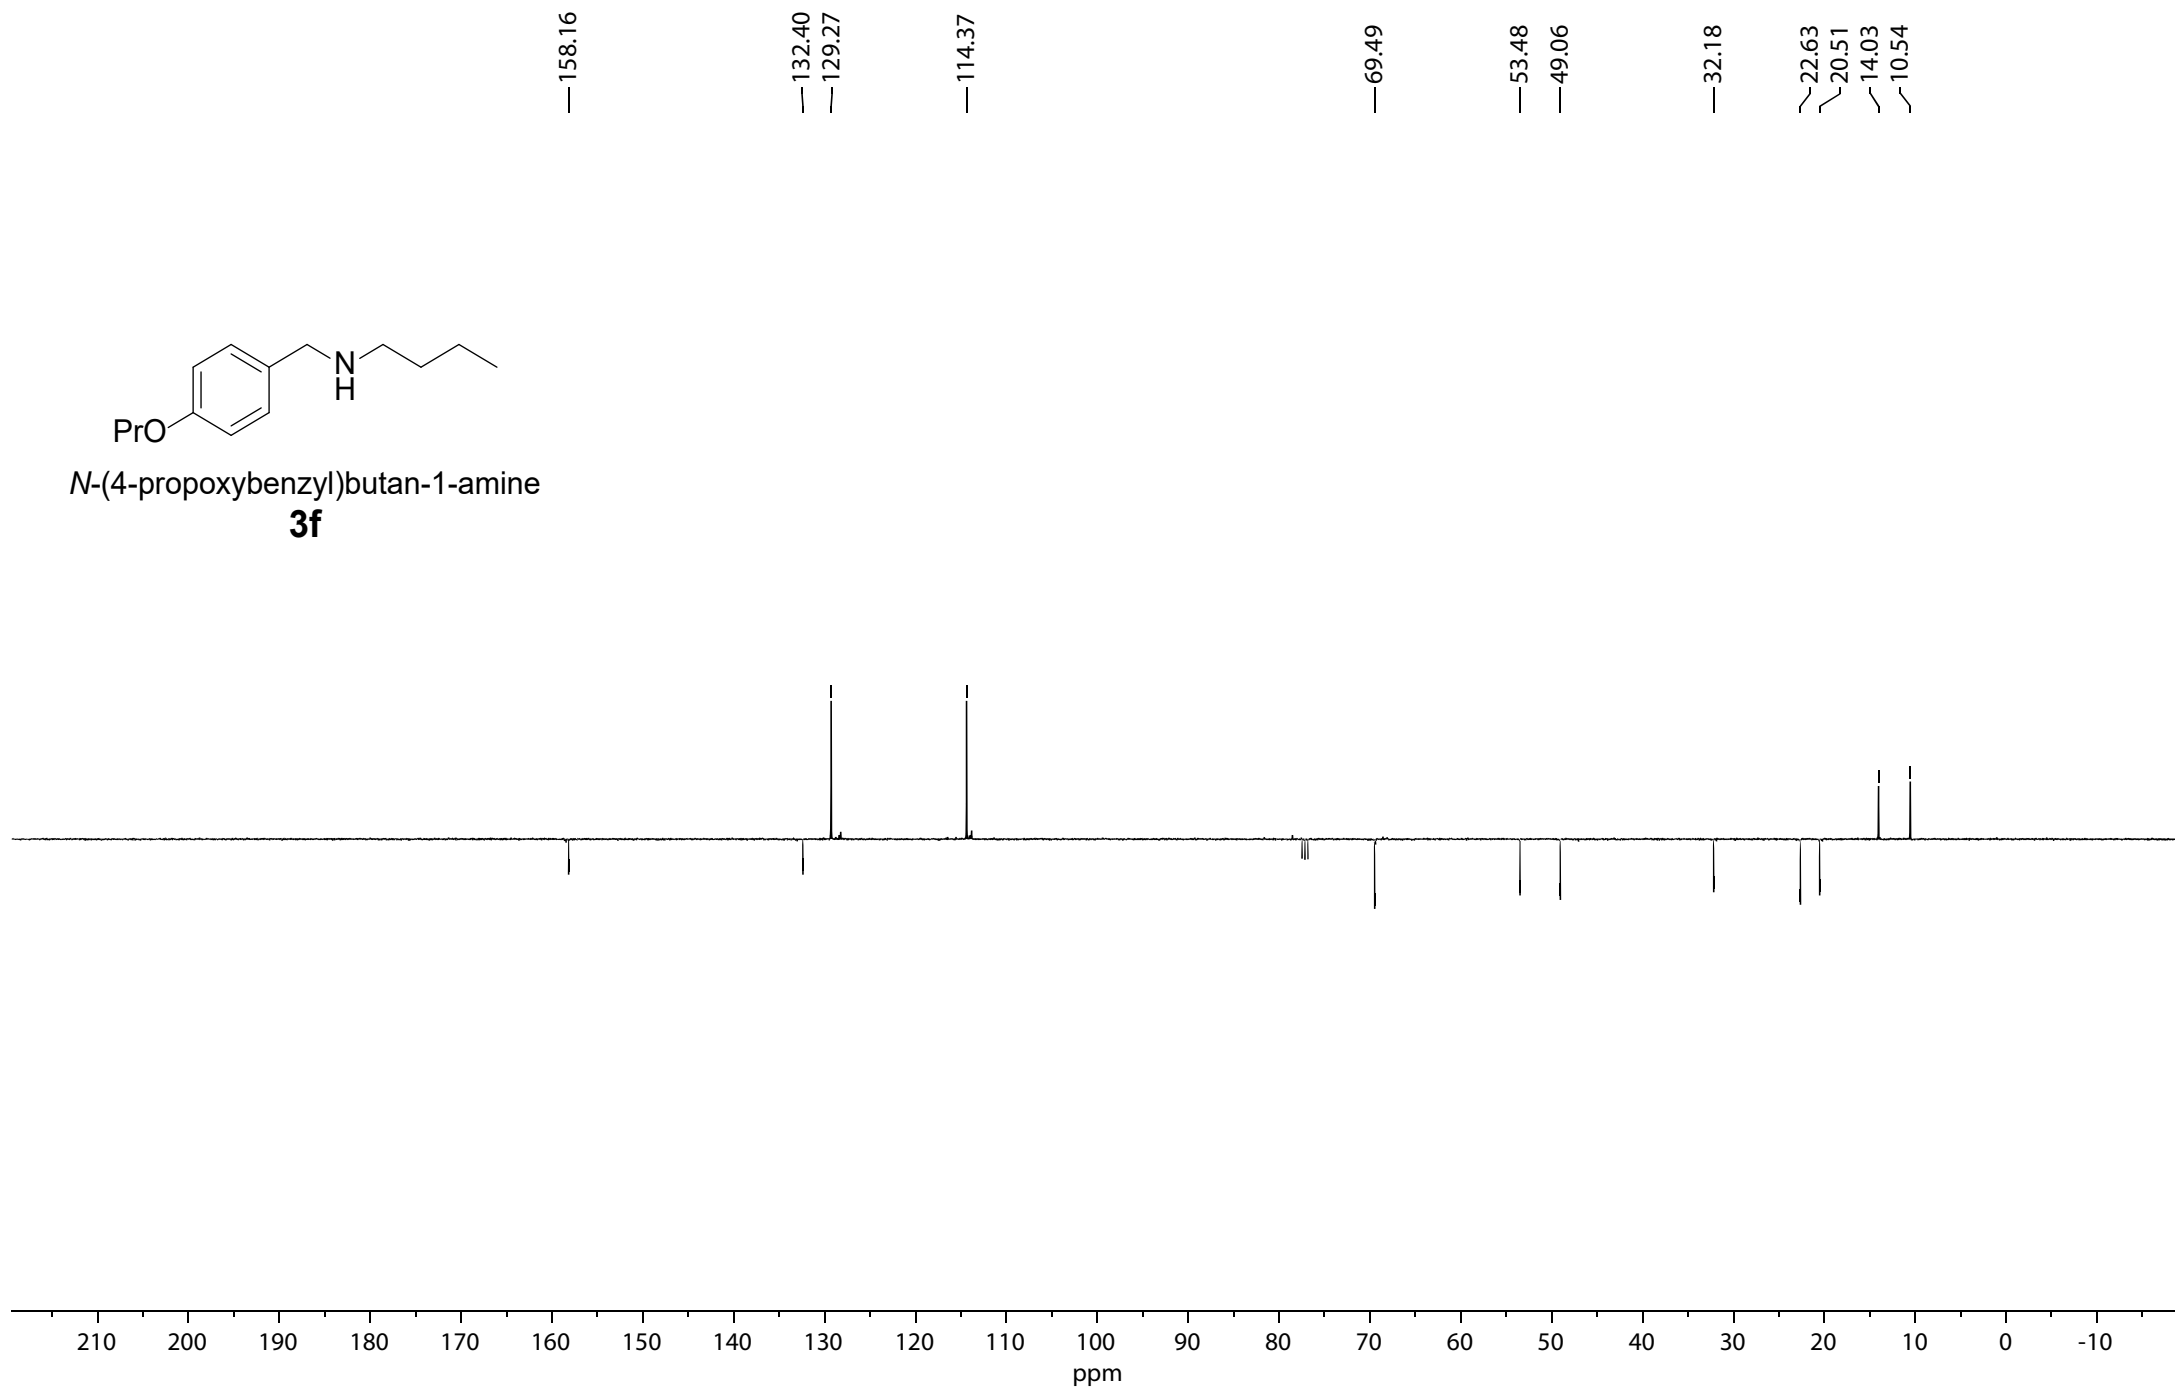

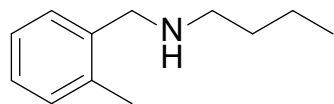

*N*-(2-methylbenzyl)butan-1-amine  
**3g**

7.31  
7.30  
7.29  
7.18  
7.17  
7.17

3.77

2.70  
2.68  
2.66  
2.36  
1.56  
1.55  
1.53  
1.51  
1.49  
1.43  
1.41  
1.39  
1.37  
1.35  
1.33  
0.96  
0.94  
0.92

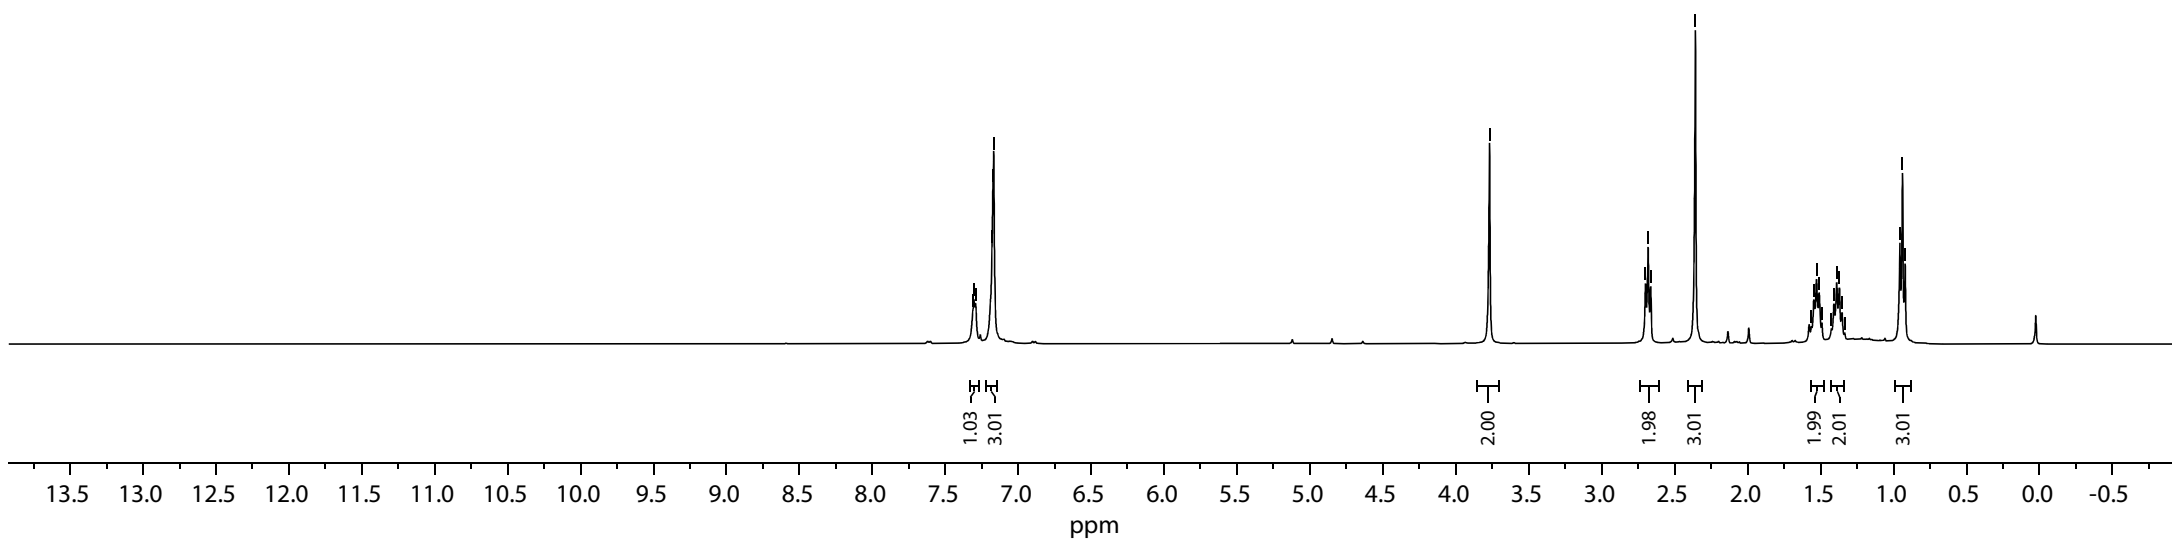

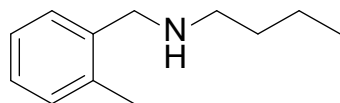

*N*-(2-methylbenzyl)butan-1-amine  
**3g**

138.58  
136.19  
130.24  
128.28  
126.87  
125.91

51.69  
49.62

32.33

20.55  
18.96  
14.07

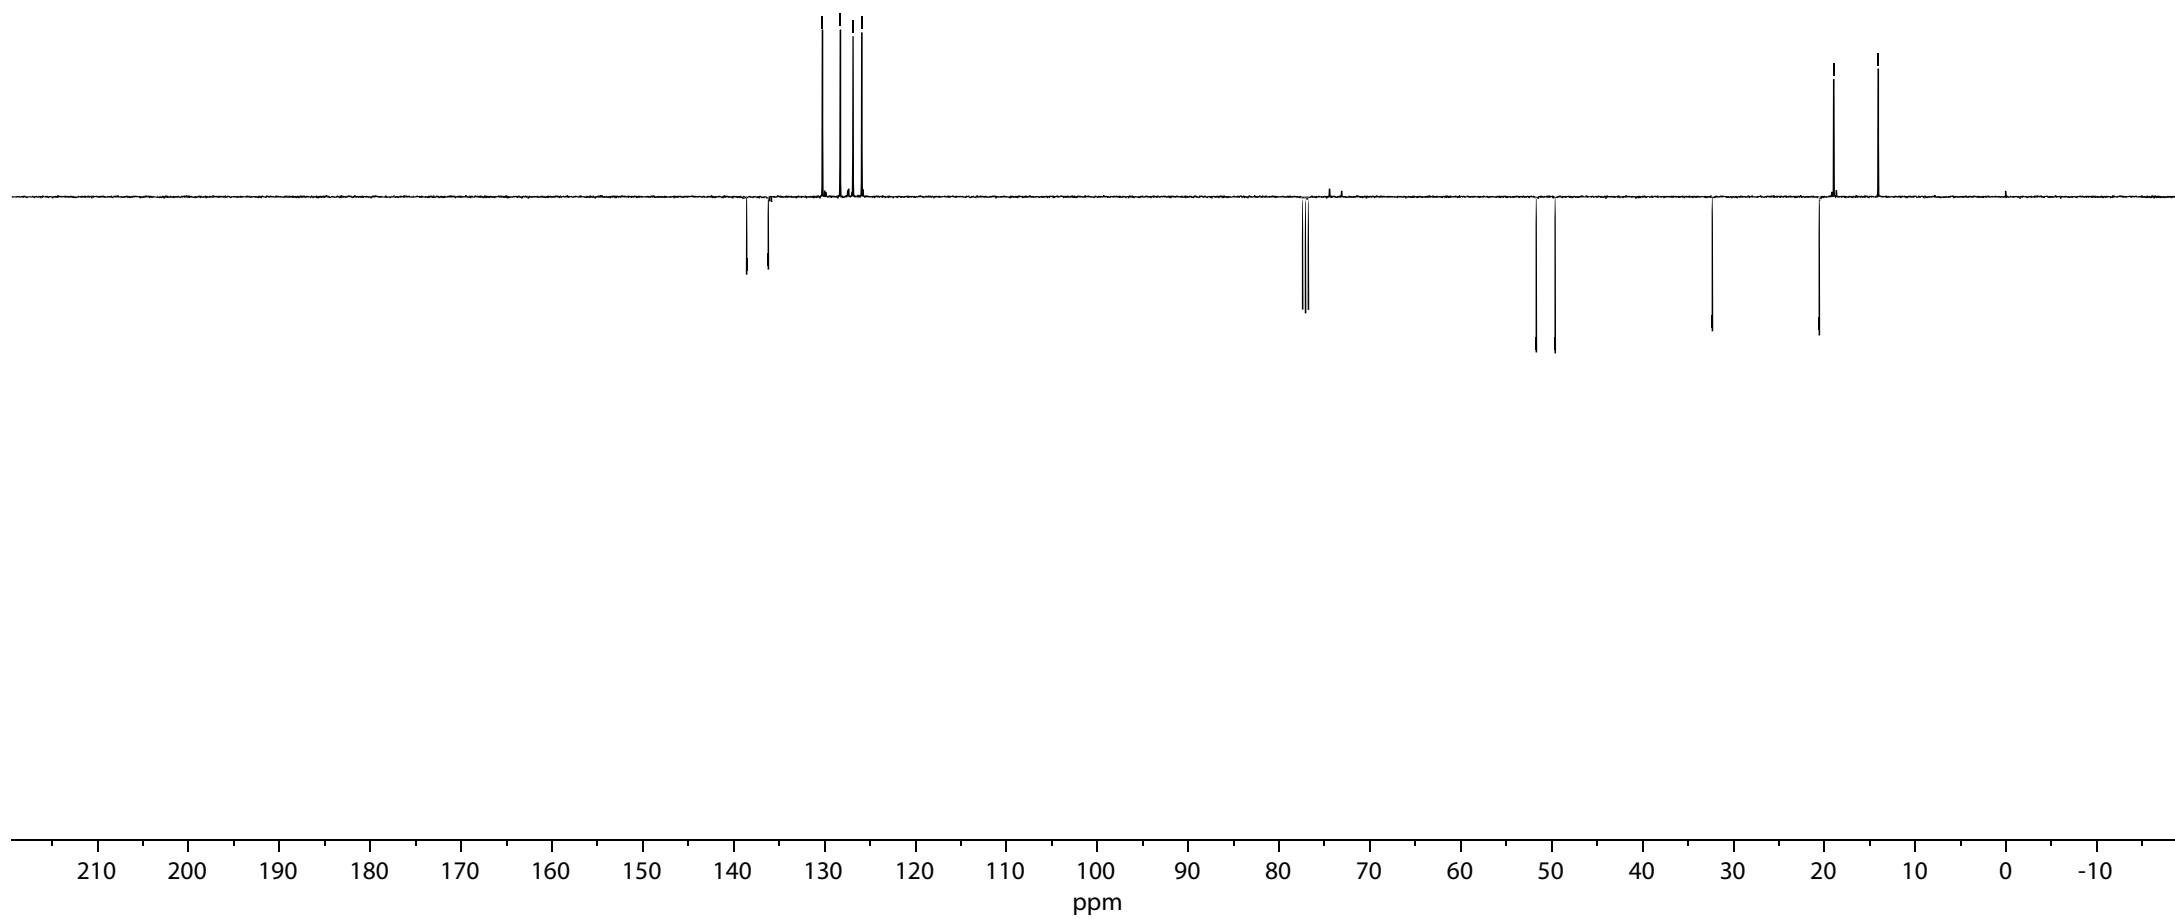

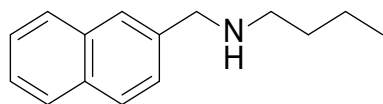

*N*-(naphthalen-2-ylmethyl)butan-1-amine  
**3h**

7.86  
7.85  
7.84  
7.84  
7.82  
7.78  
7.50  
7.49  
7.48  
7.48  
7.47

3.96

2.70  
2.68  
2.67  
1.59  
1.57  
1.55  
1.53  
1.52  
1.44  
1.43  
1.41  
1.39  
1.37  
1.35  
0.98  
0.96  
0.95

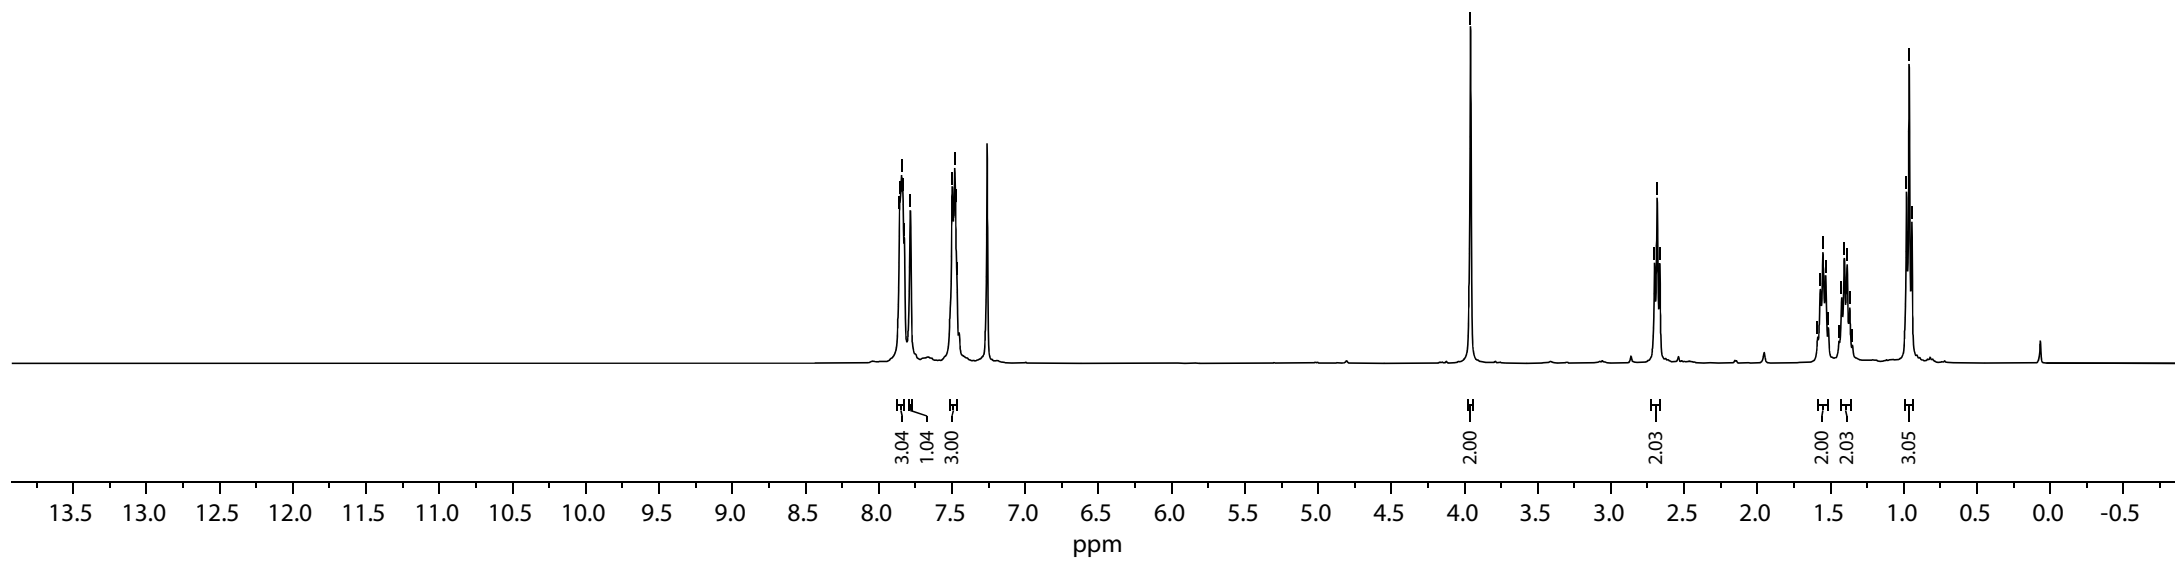

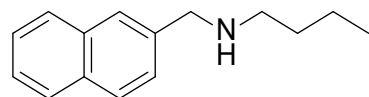

*N*-(naphthalen-2-ylmethyl)butan-1-amine  
**3h**

138.18  
133.54  
132.70  
128.07  
127.76  
127.71  
126.68  
126.42  
126.01  
125.54

—54.16

—49.20

—32.33

—20.59

—14.13

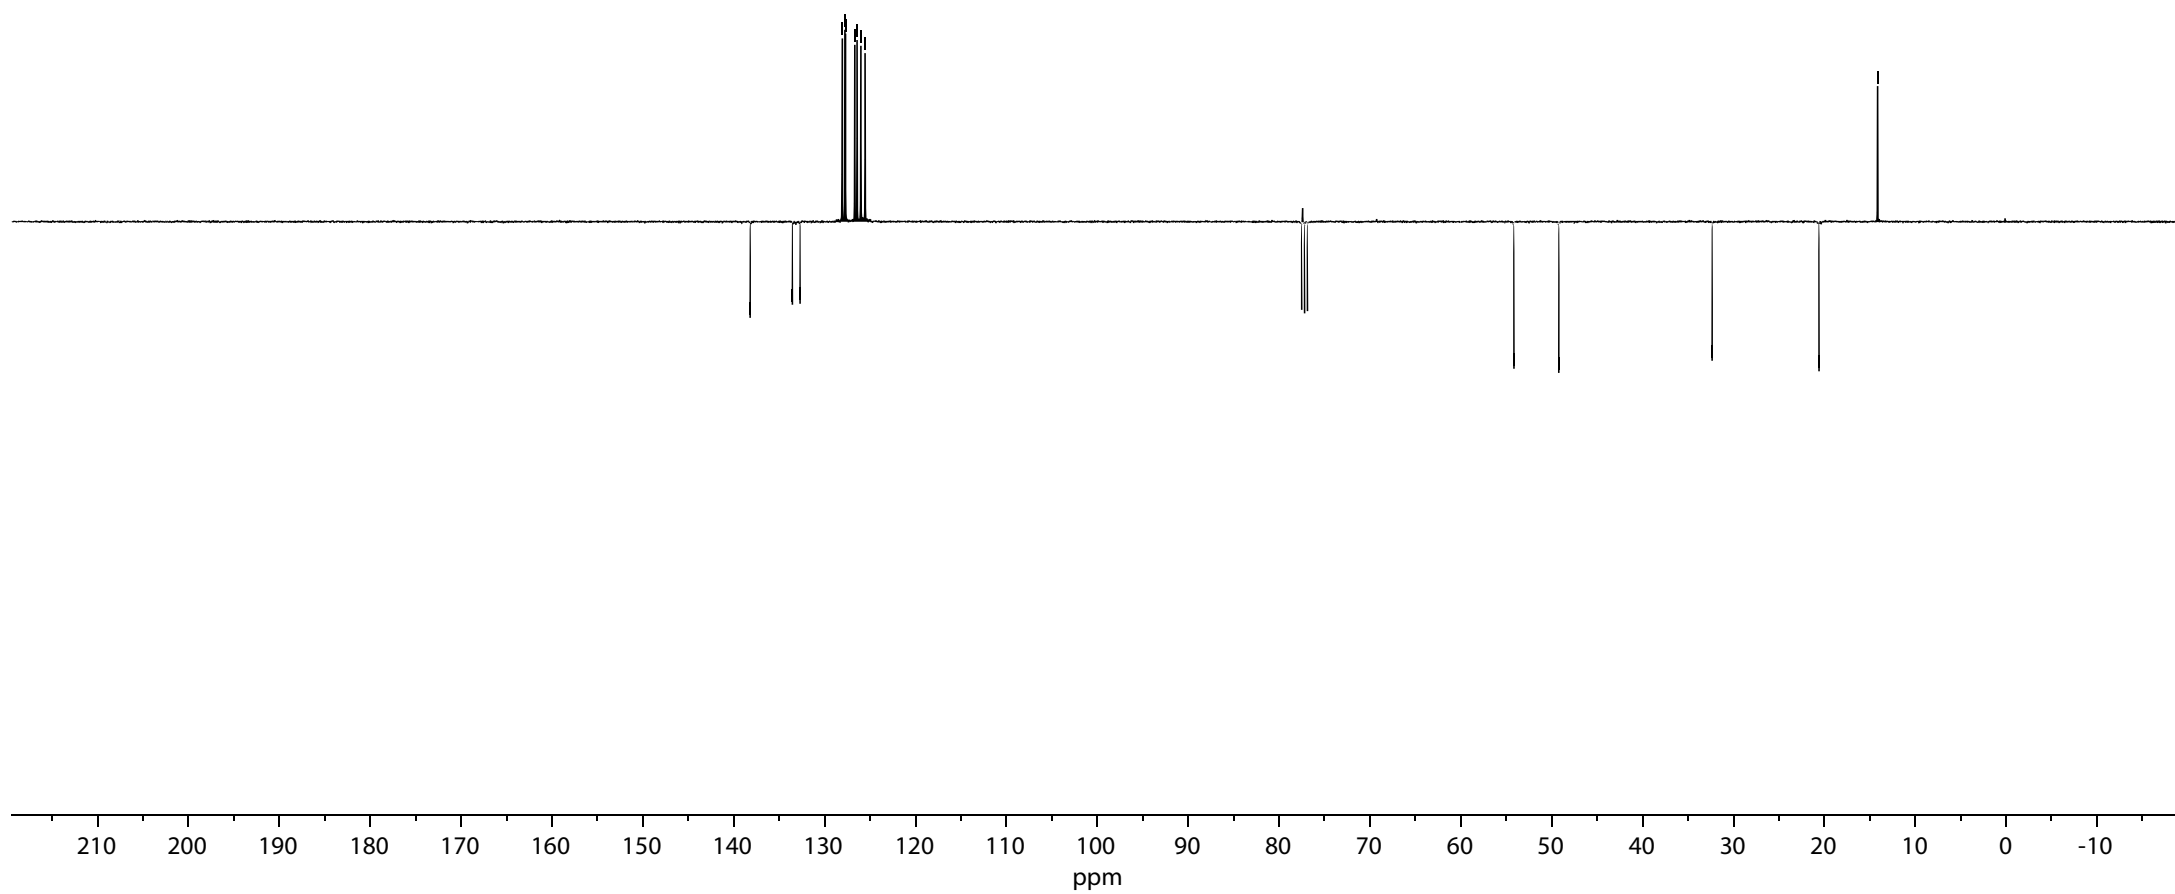

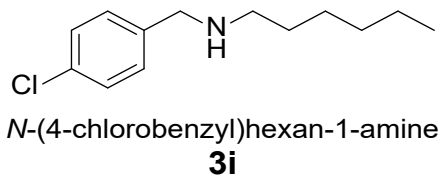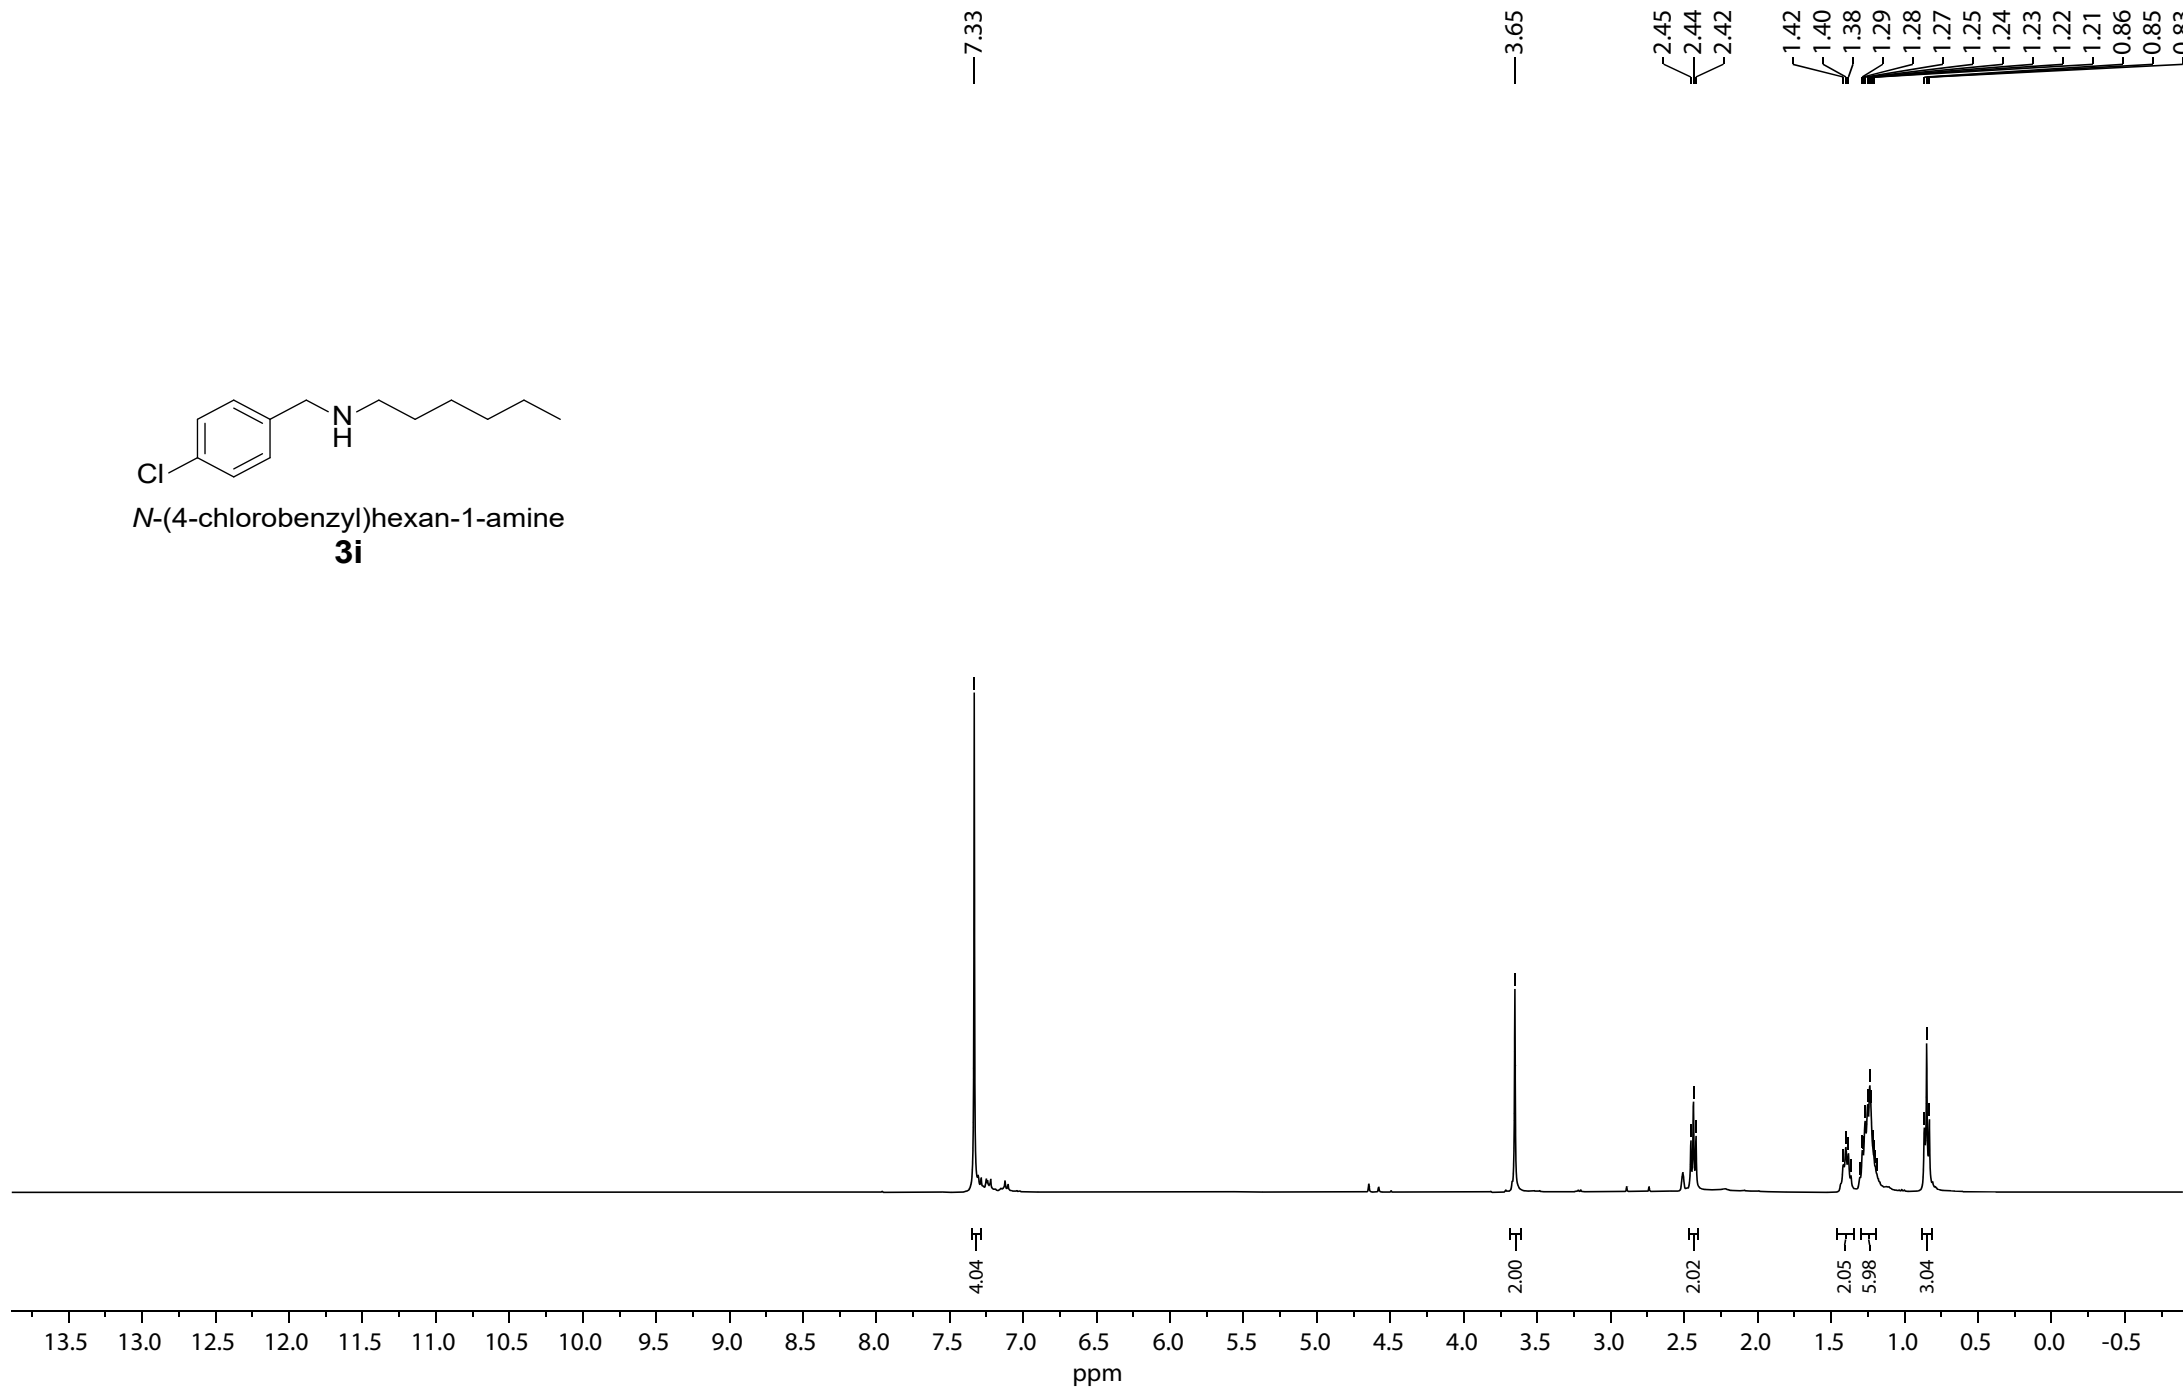



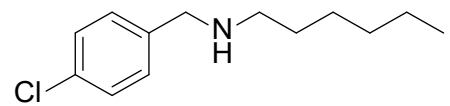

*N*-(4-chlorobenzyl)hexan-1-amine  
**3i**

— 140.69

— 131.34

— 130.05

— 128.38

— 52.72

— 49.12

— 31.77

— 29.99

— 27.02

— 22.60

— 14.37

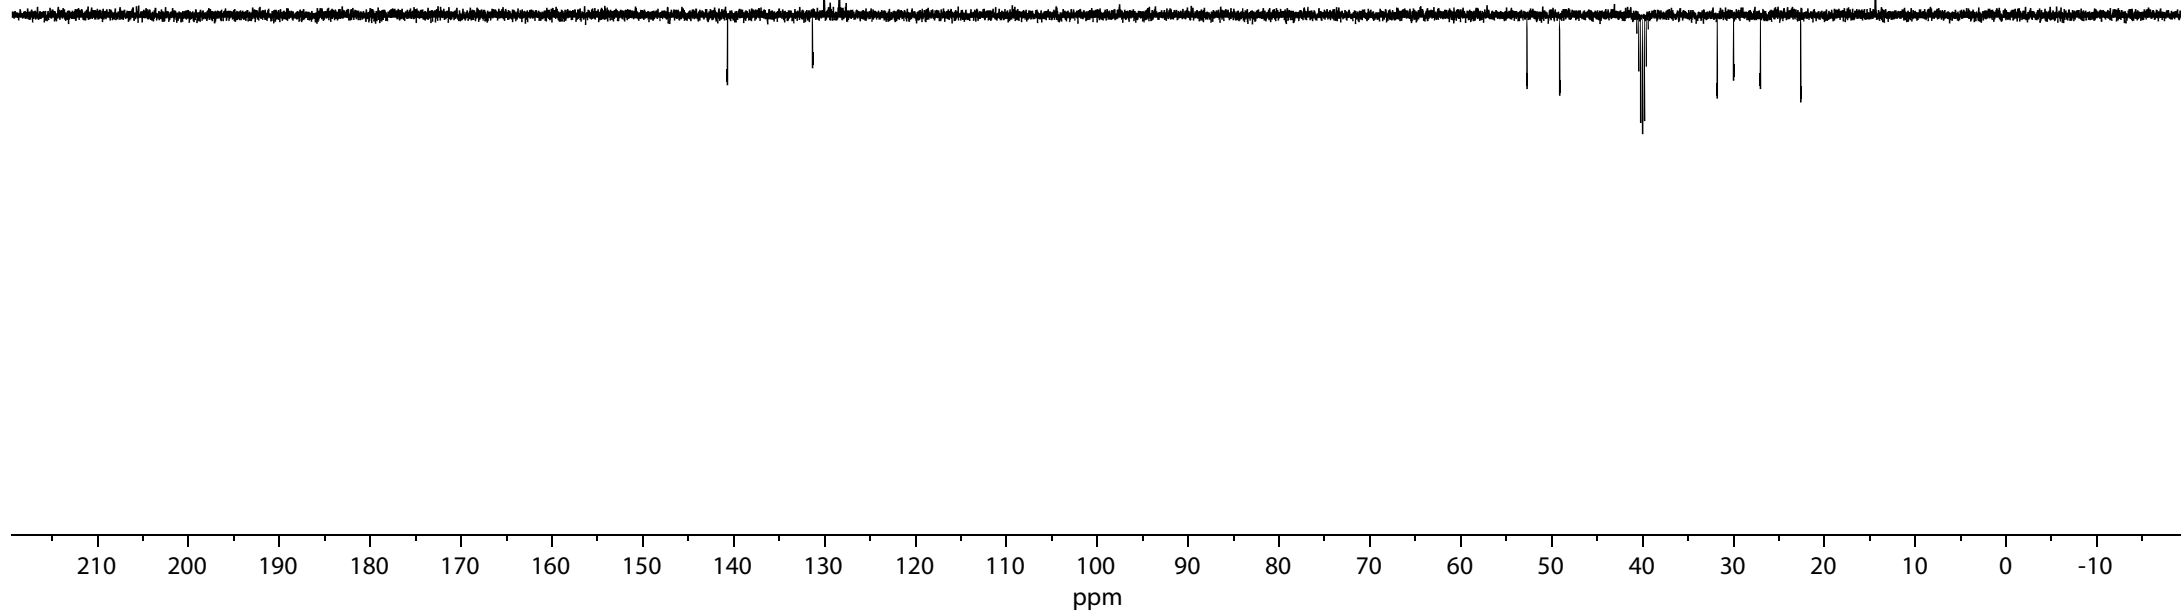

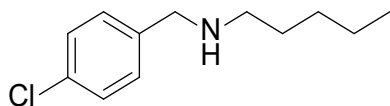

*N*-(4-chlorobenzyl)pentan-1-amine

**3j**

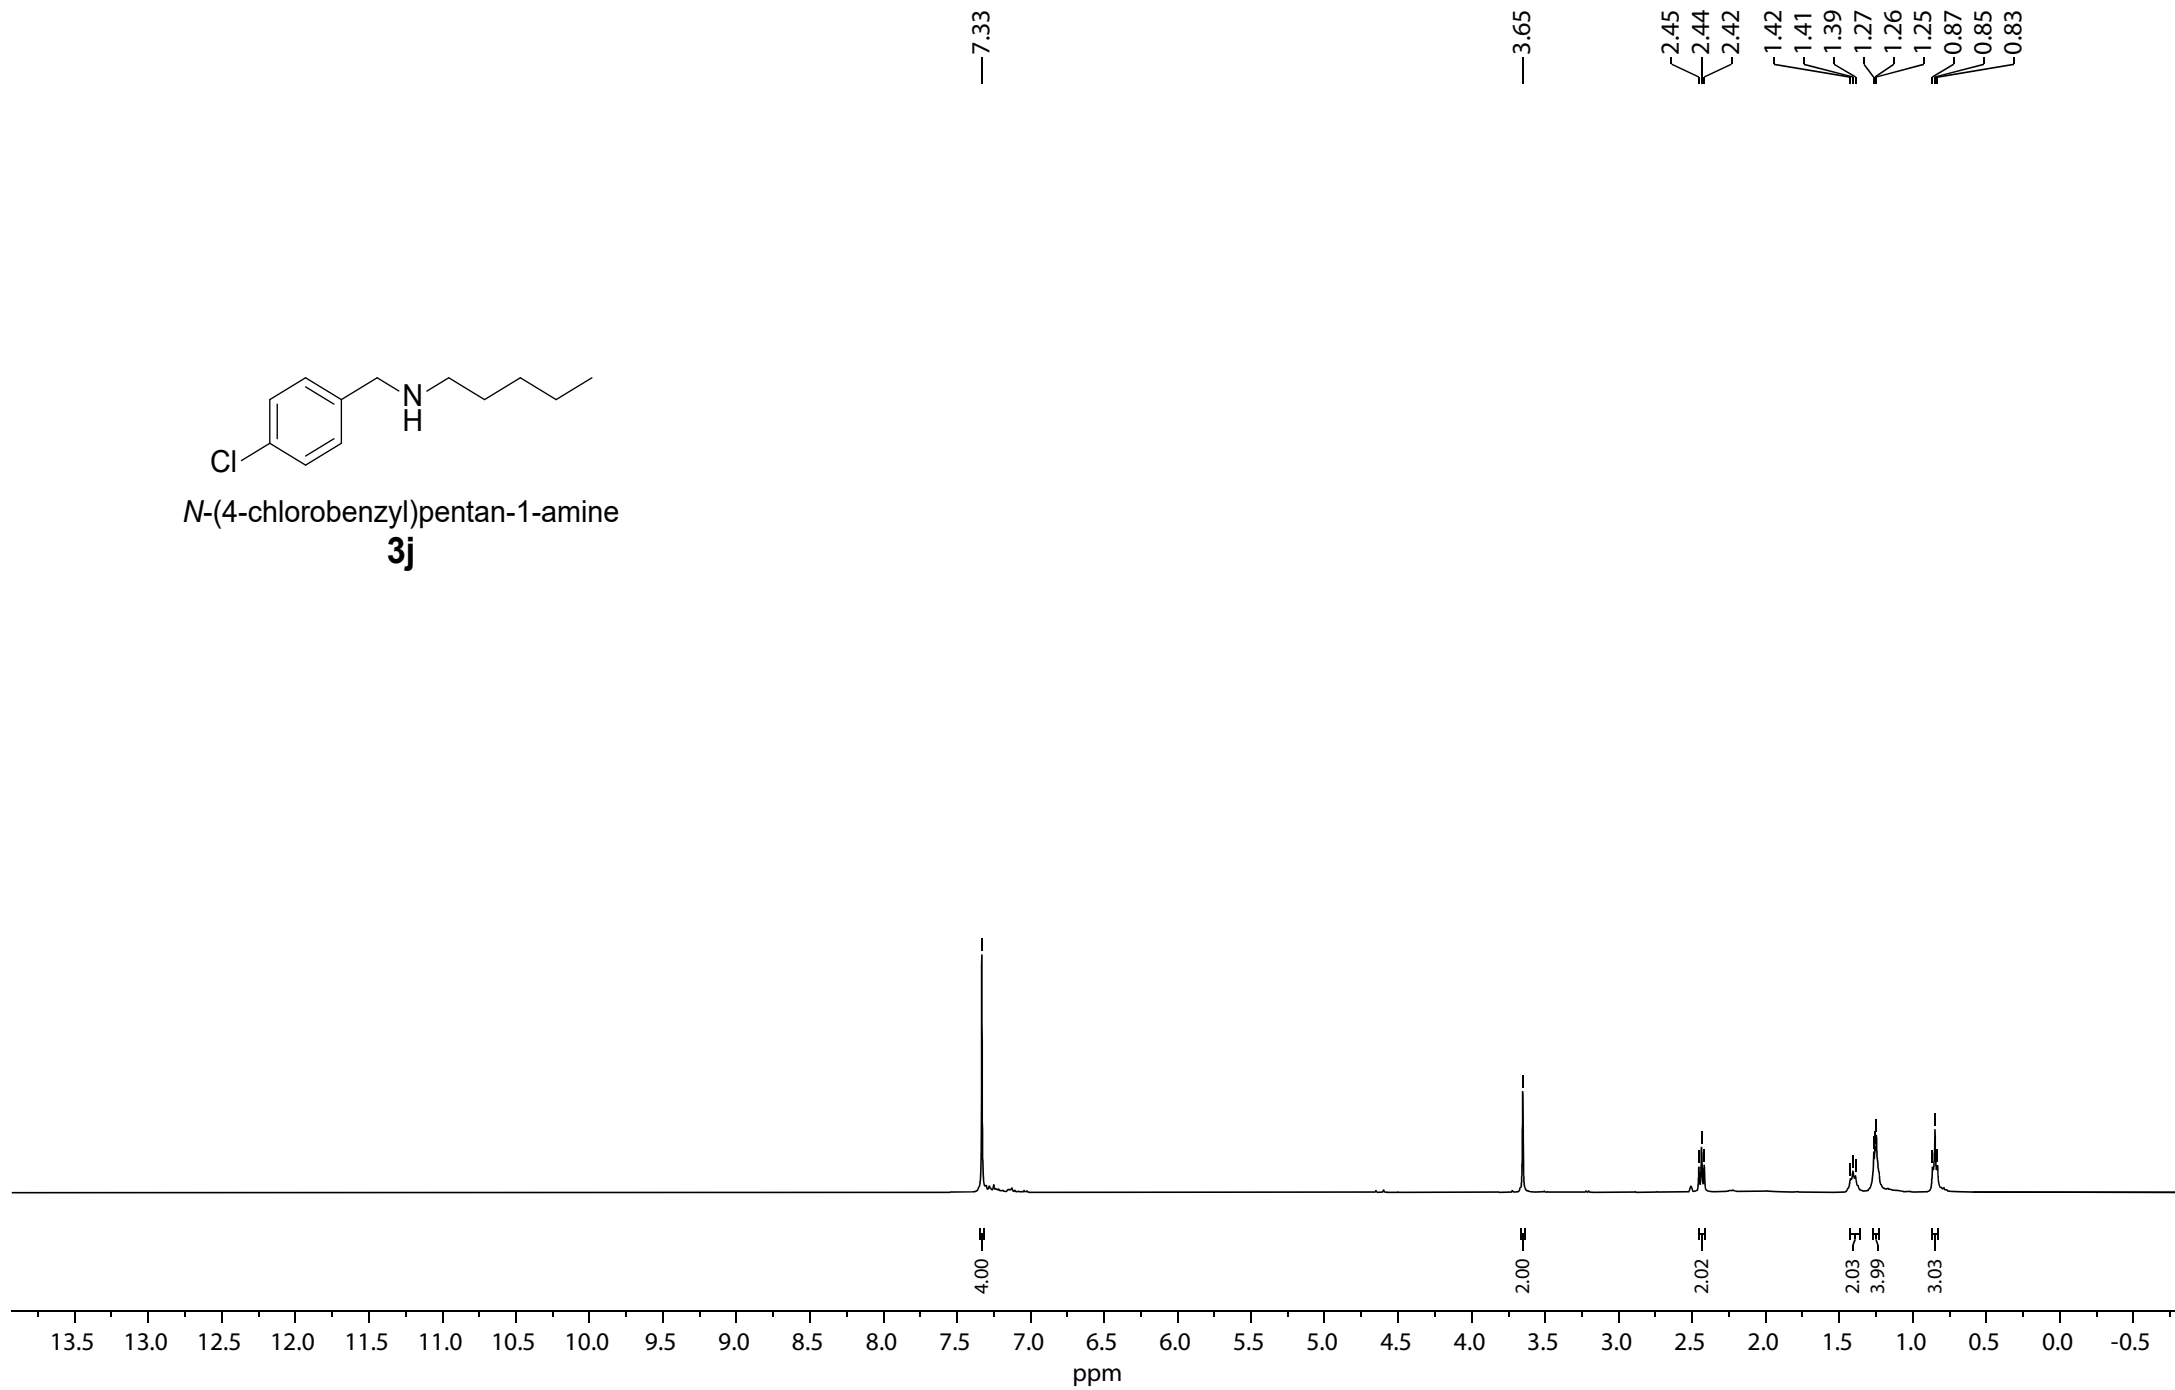

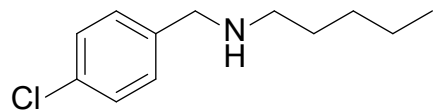

*N*-(4-chlorobenzyl)pentan-1-amine  
**3j**

— 140.71

— 131.35

— 130.03

— 128.37

— 52.74

— 49.12

— 29.72

— 29.58

— 22.59

— 14.39

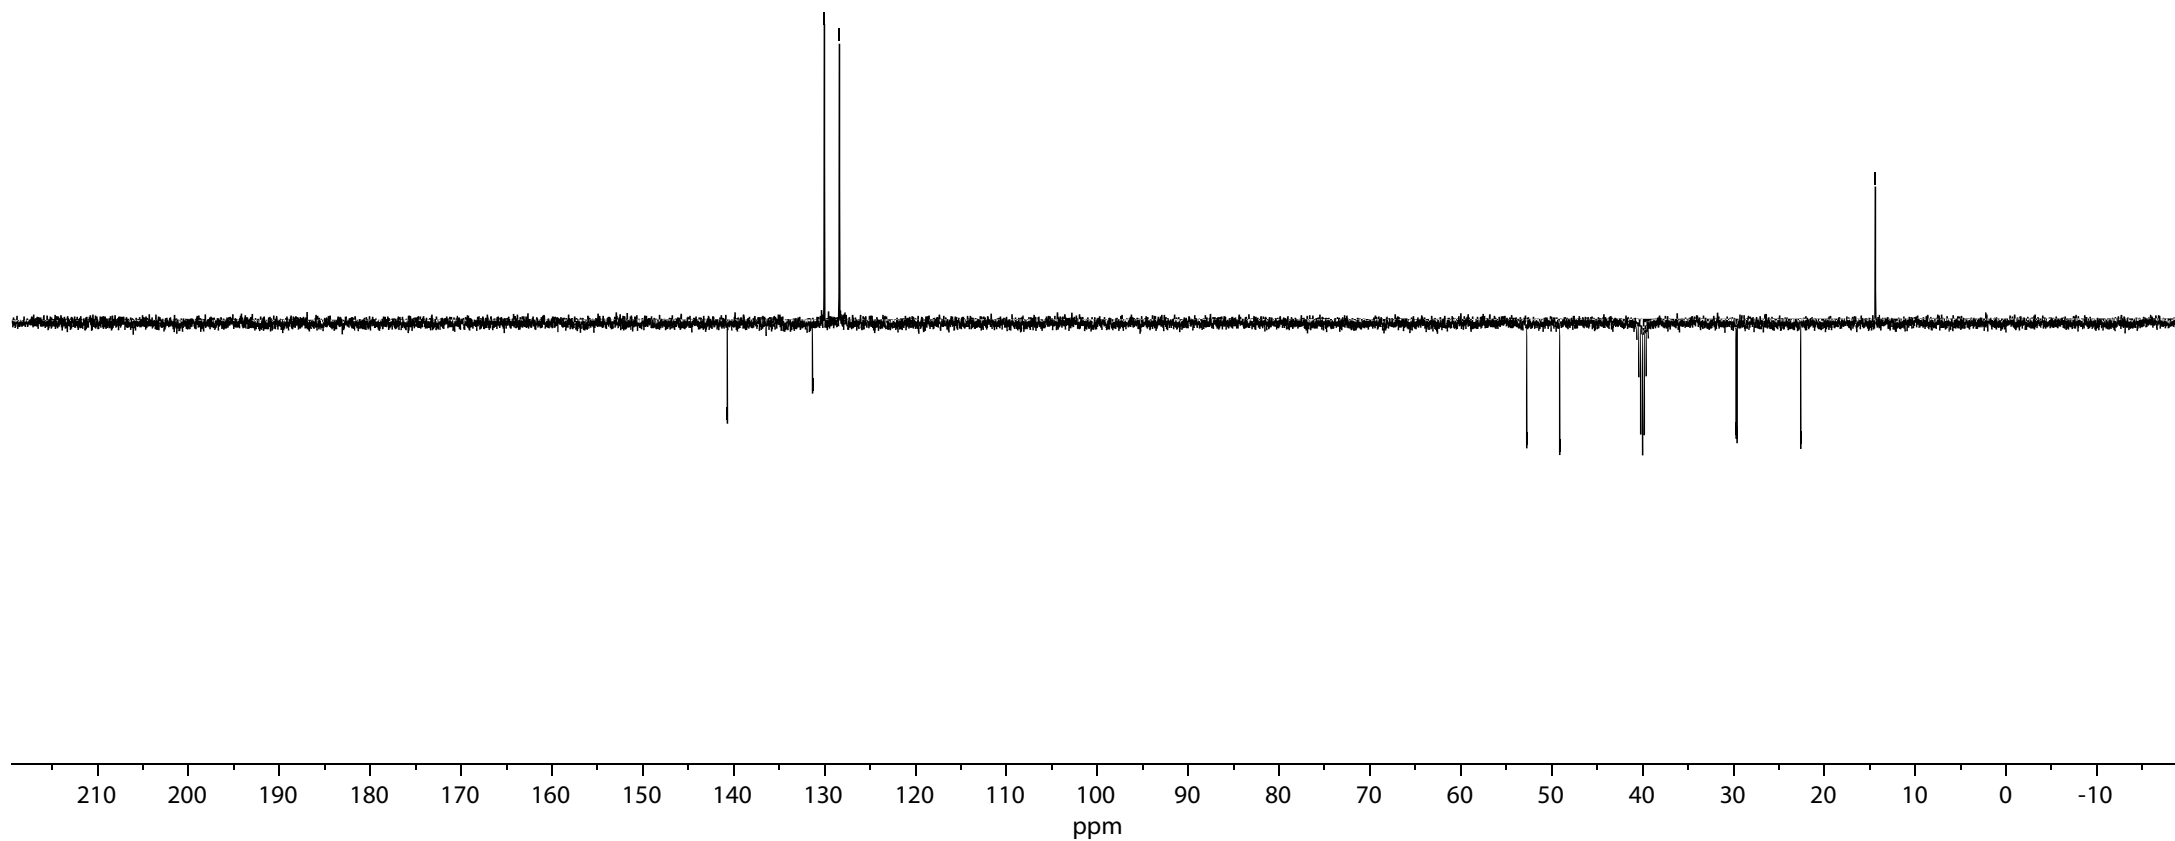

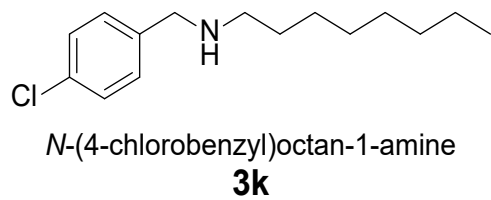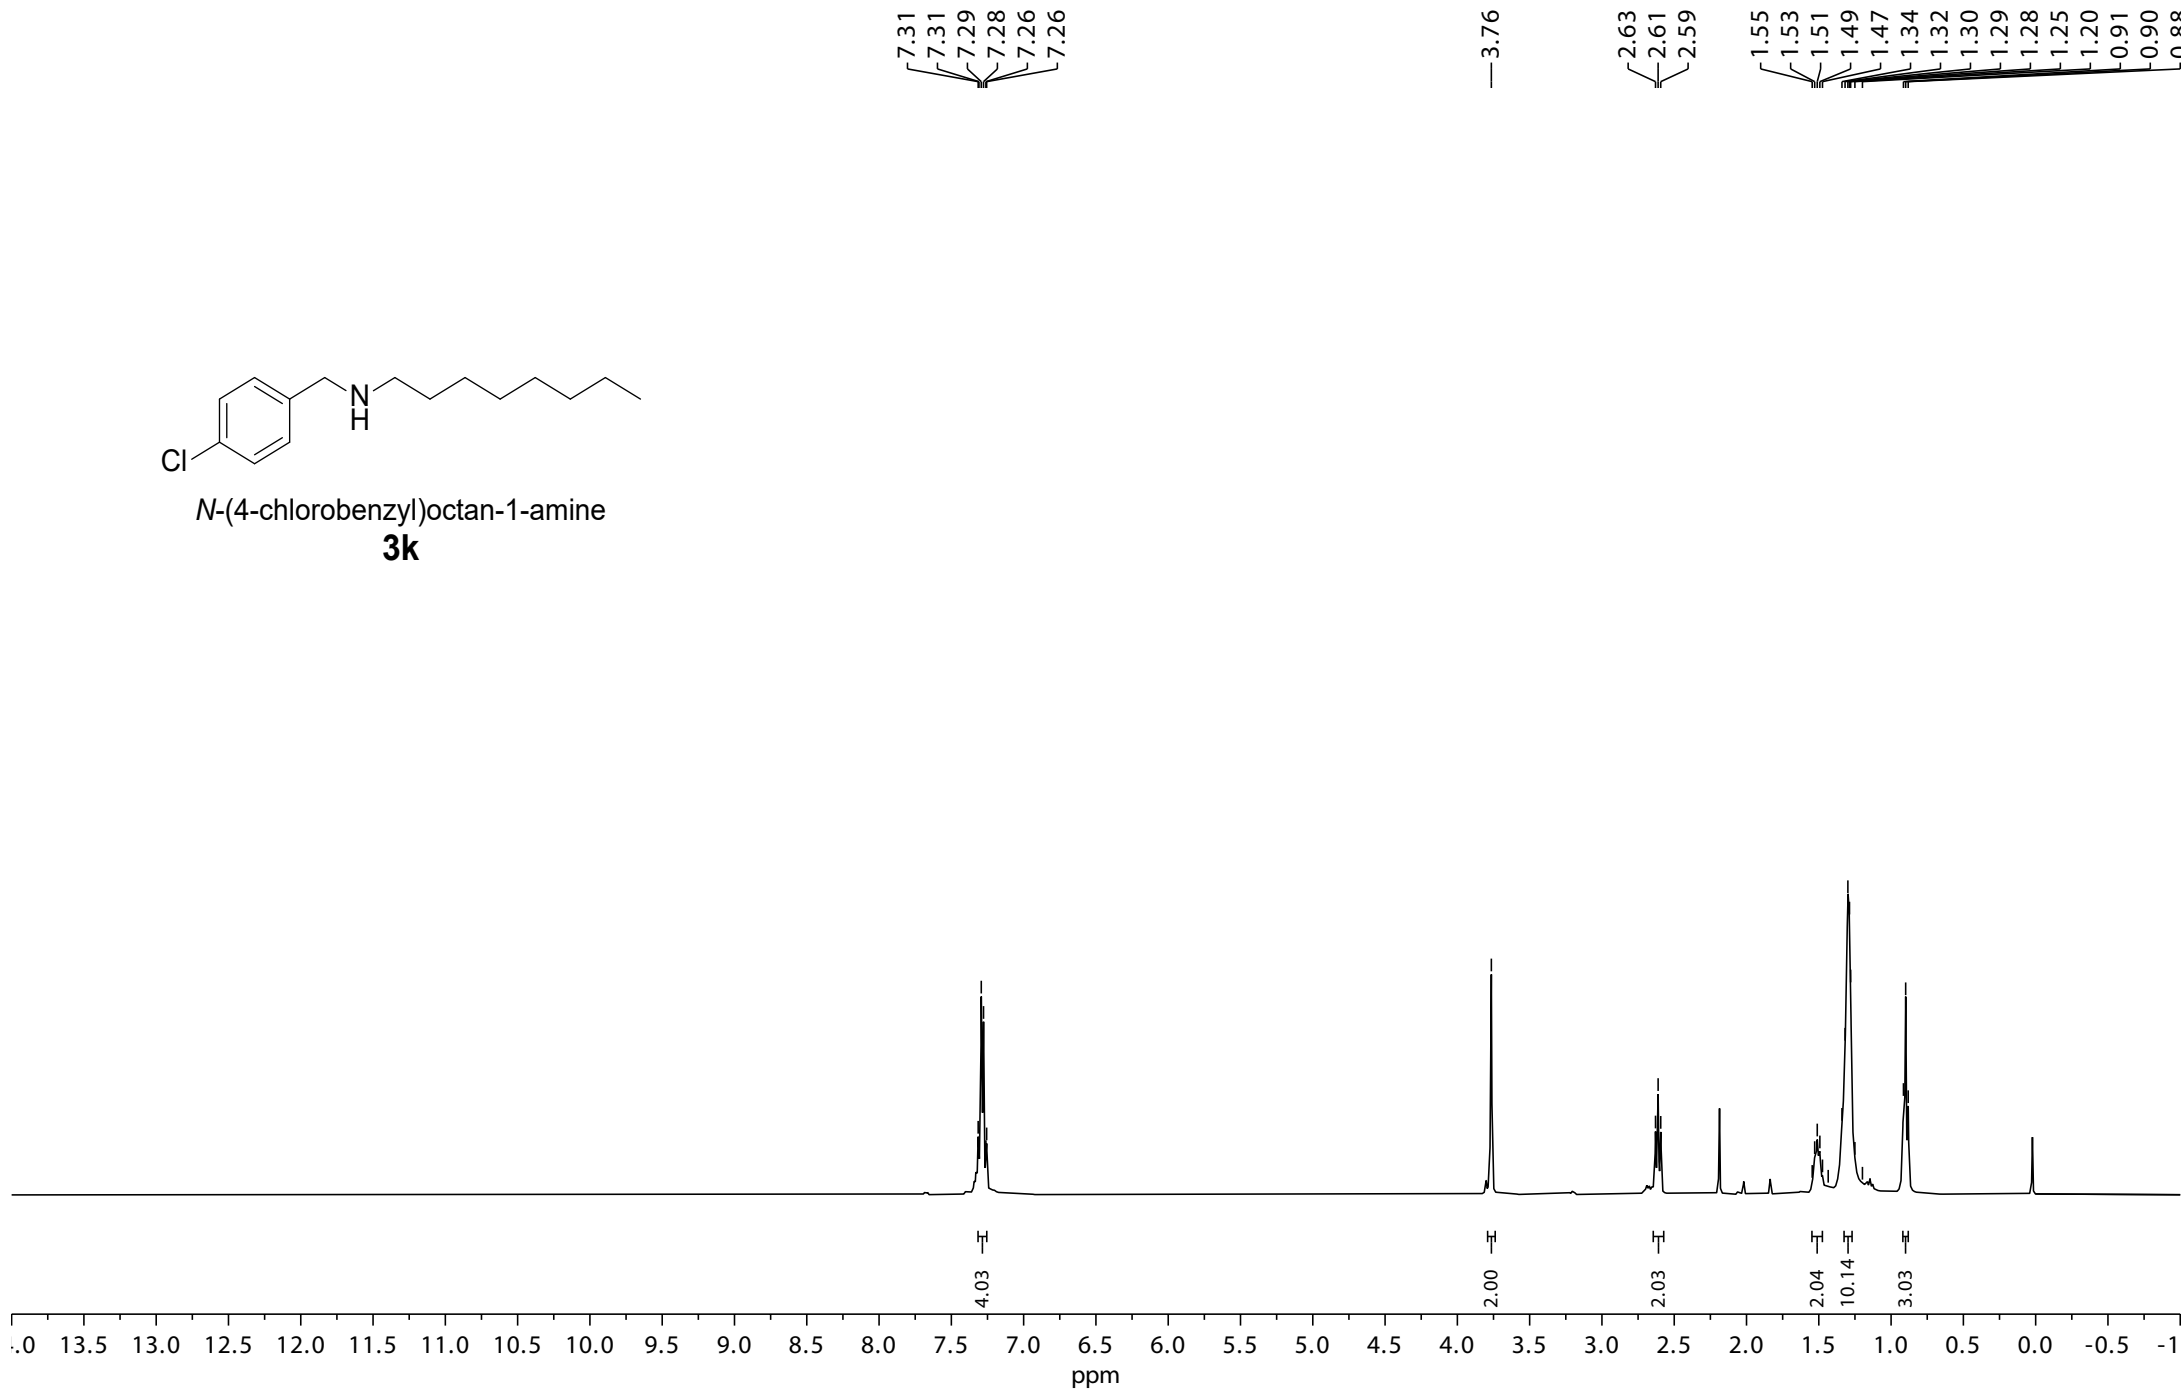

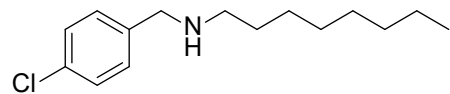

*N*-(4-chlorobenzyl)octan-1-amine  
**3k**

— 139.11  
/ 132.49  
/ 129.41  
/ 128.43

— 53.33  
— 49.47

31.84  
30.11  
29.53  
29.28  
27.35  
22.67  
— 14.10

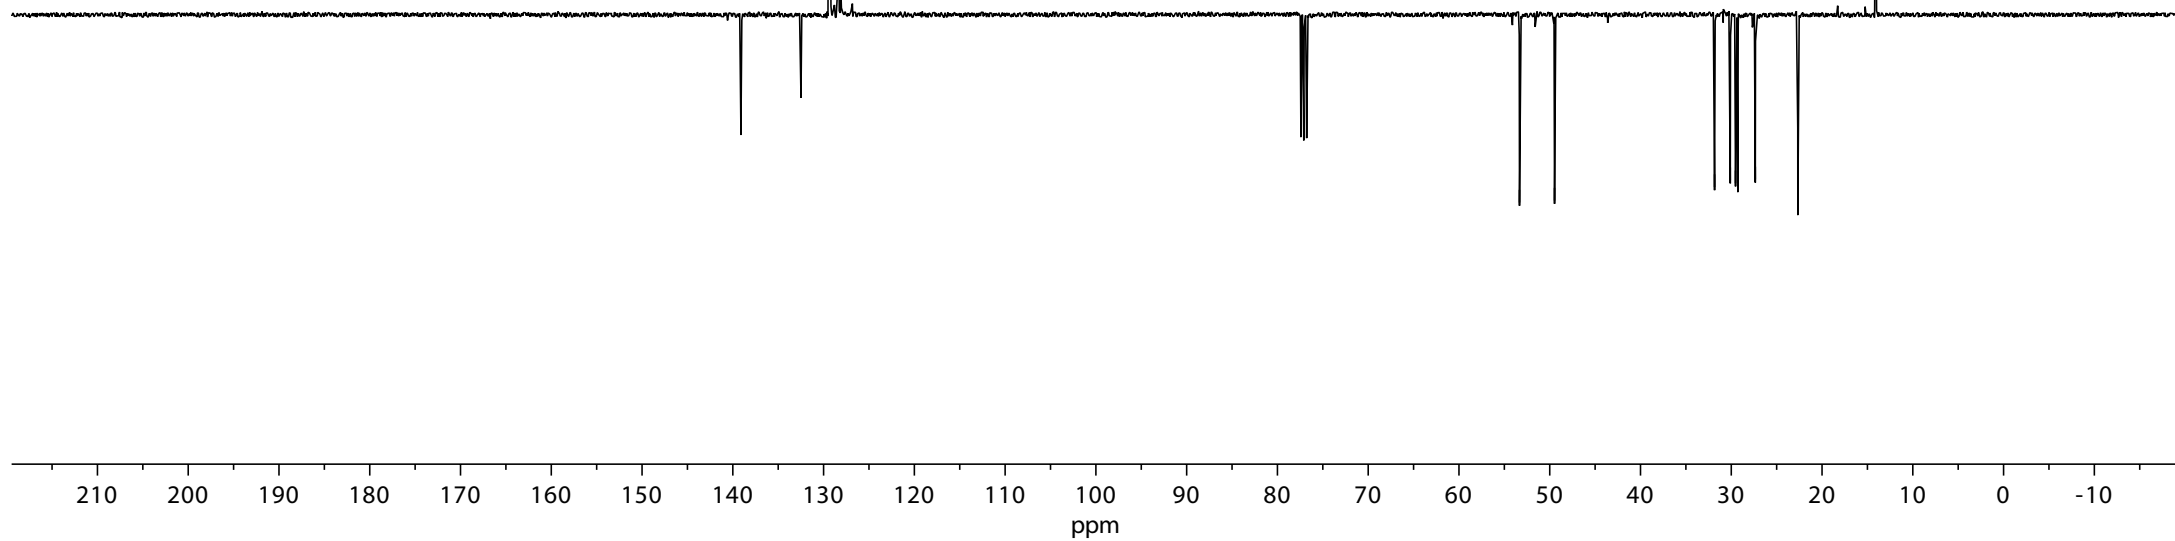

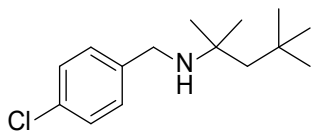

*N*-(4-chlorobenzyl)-2,4,4-trimethylpentan-2-amine

**31**

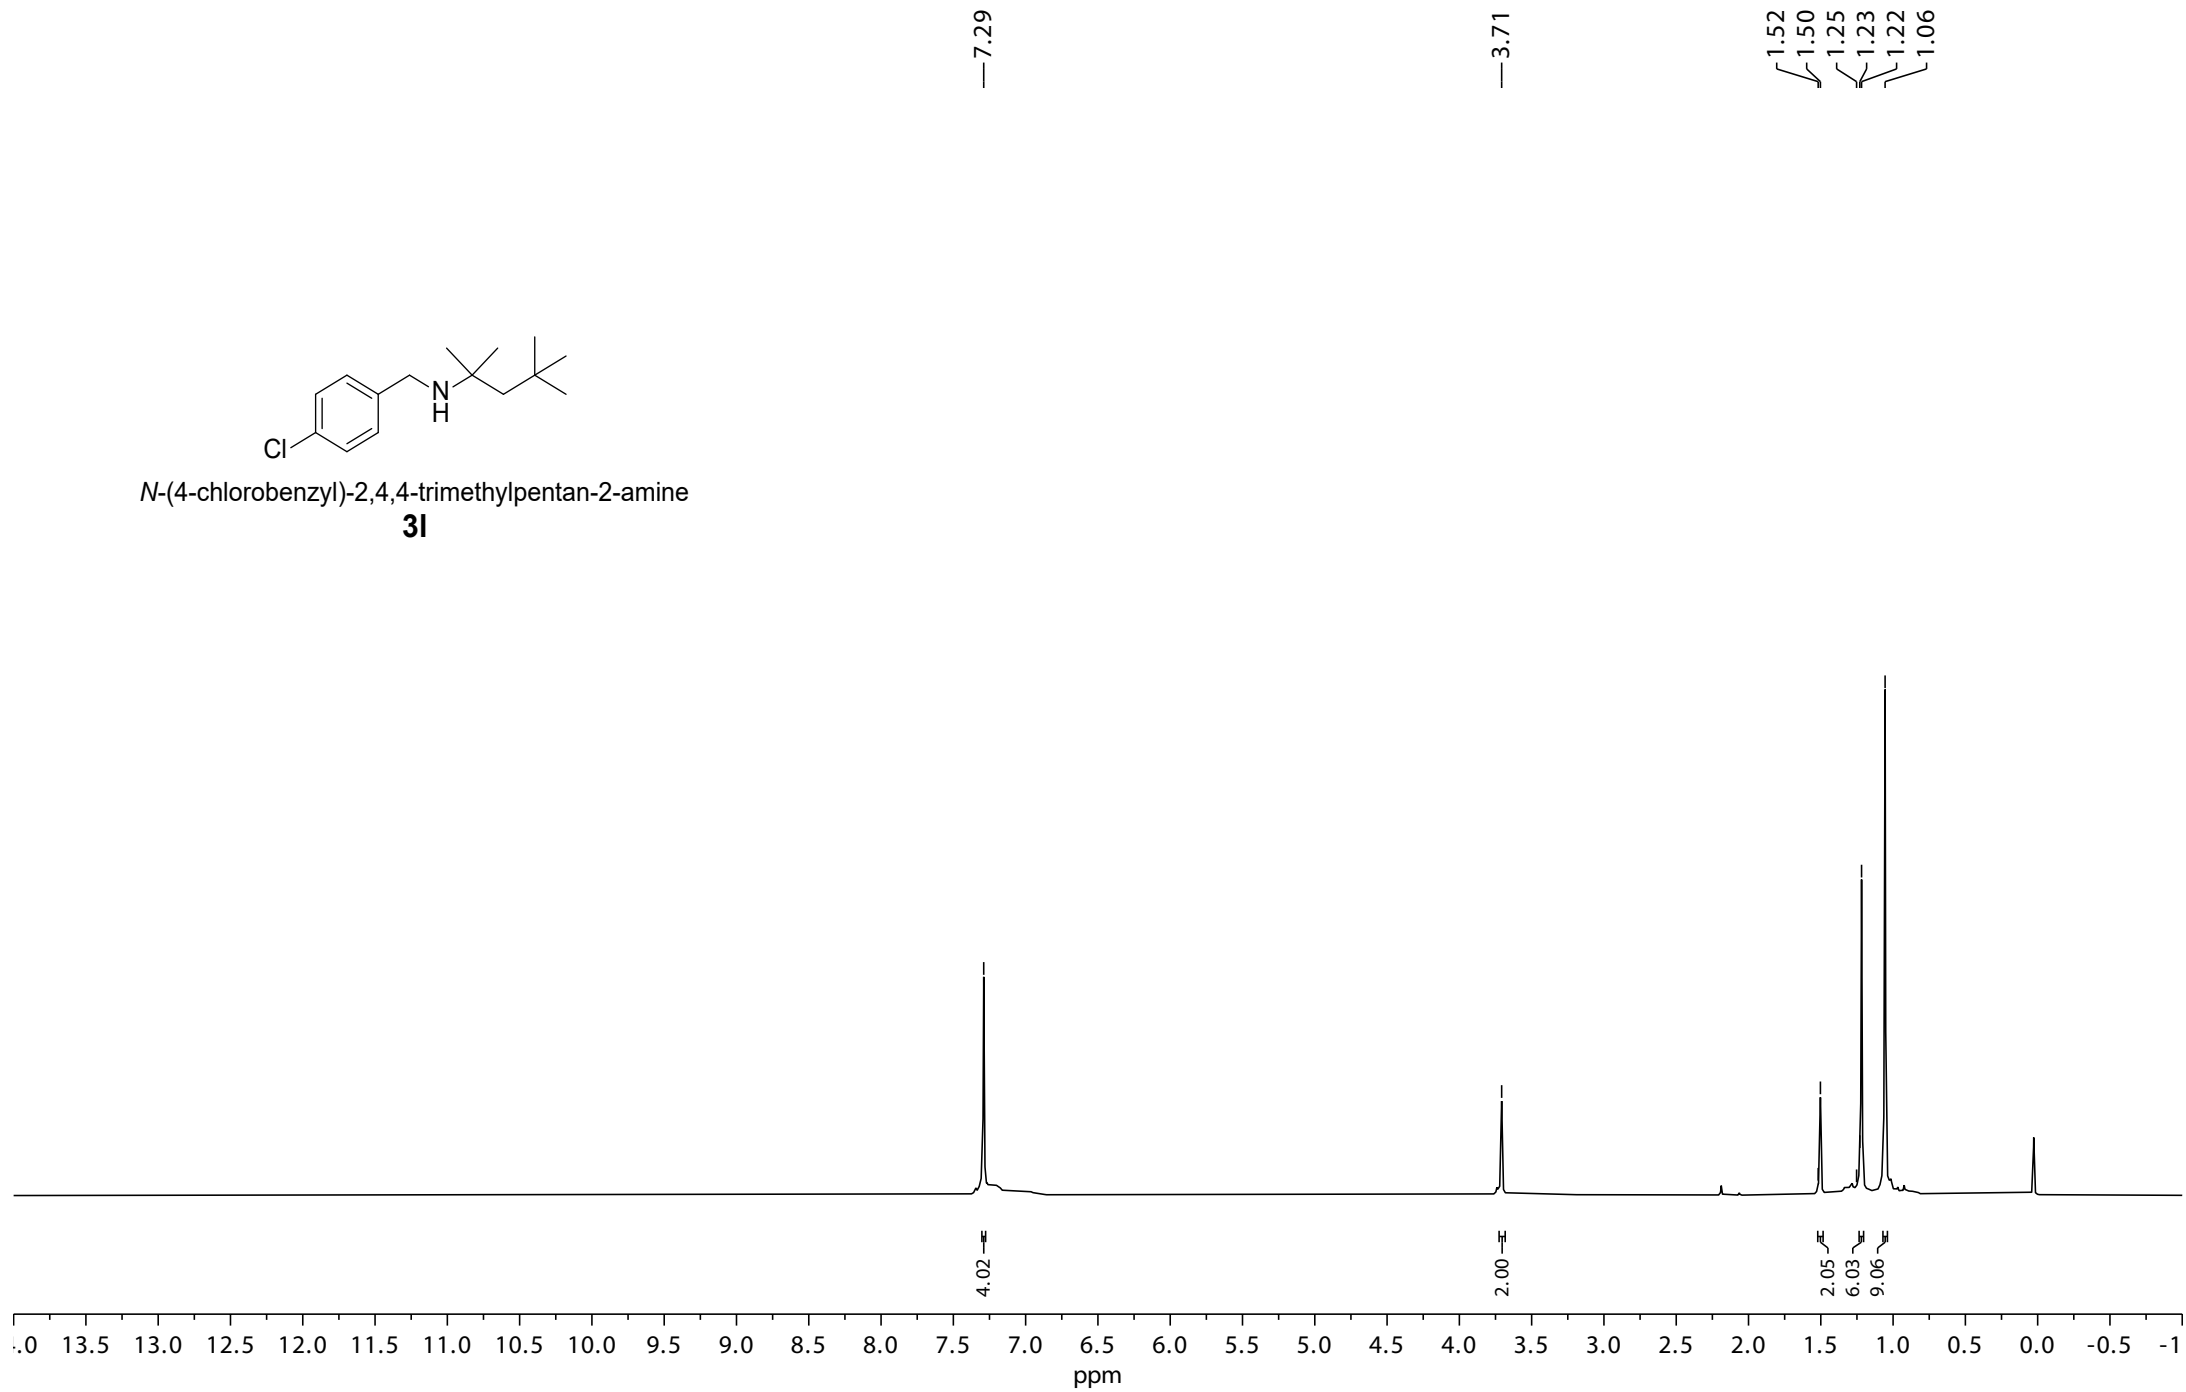

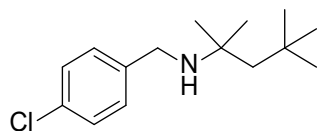

*N*-(4-chlorobenzyl)-2,4,4-trimethylpentan-2-amine

**31**

— 140.04

∩ 132.33

∩ 129.54

∩ 128.44

∩ 54.67

∩ 53.09

— 45.93

∩ 31.81

∩ 31.74

∩ 29.03

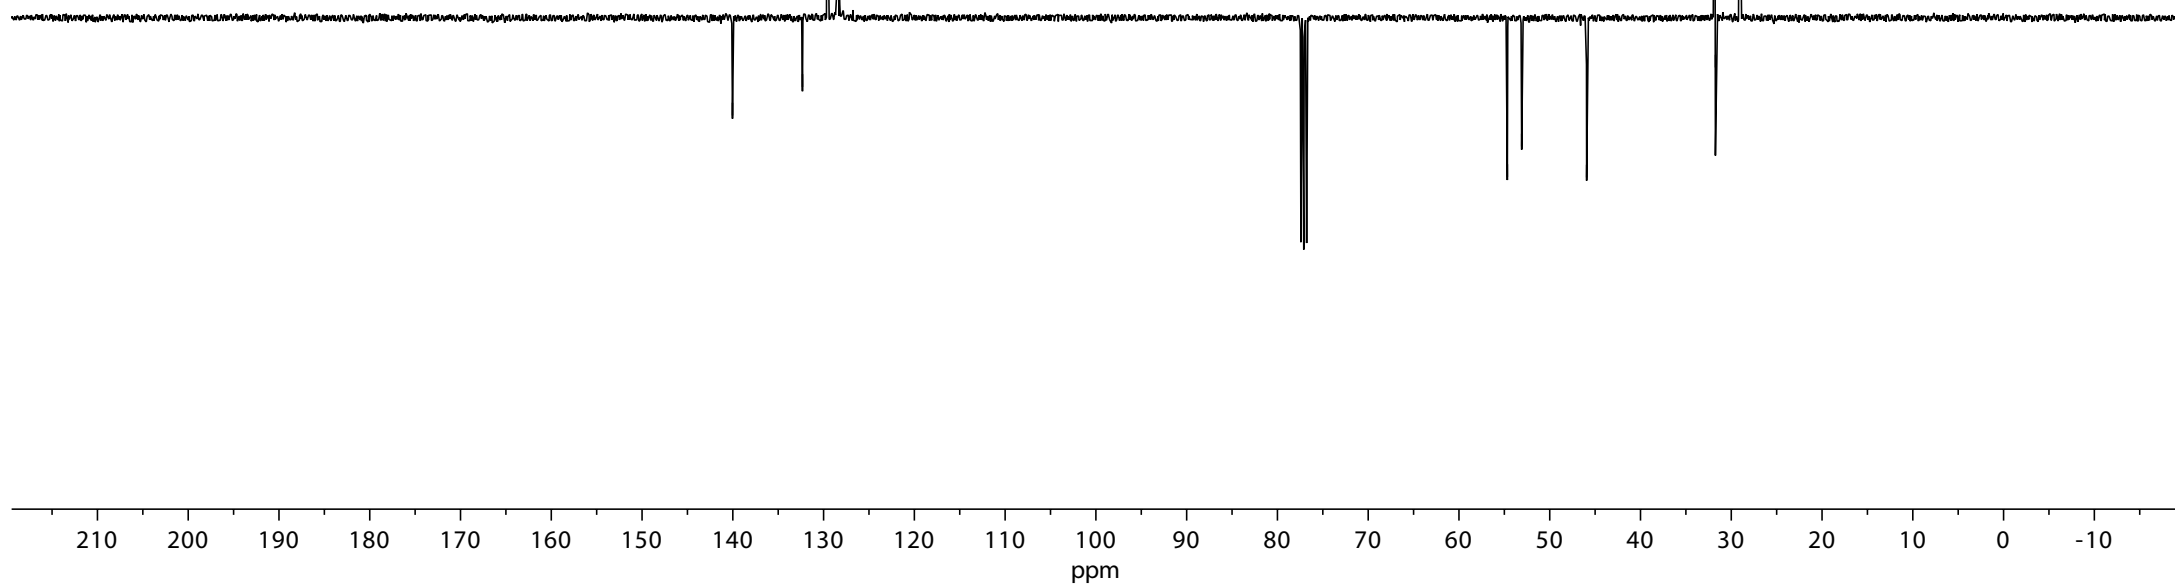

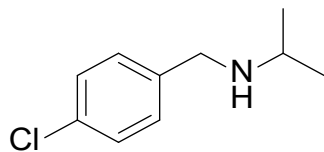

*N*-(4-chlorobenzyl)propan-2-amine  
**3m**

7.34  
7.33  
7.32  
7.31  
7.29

3.65  
3.64  
2.69  
2.67  
2.66  
2.64  
2.63  
2.61  
2.60

0.96  
0.95

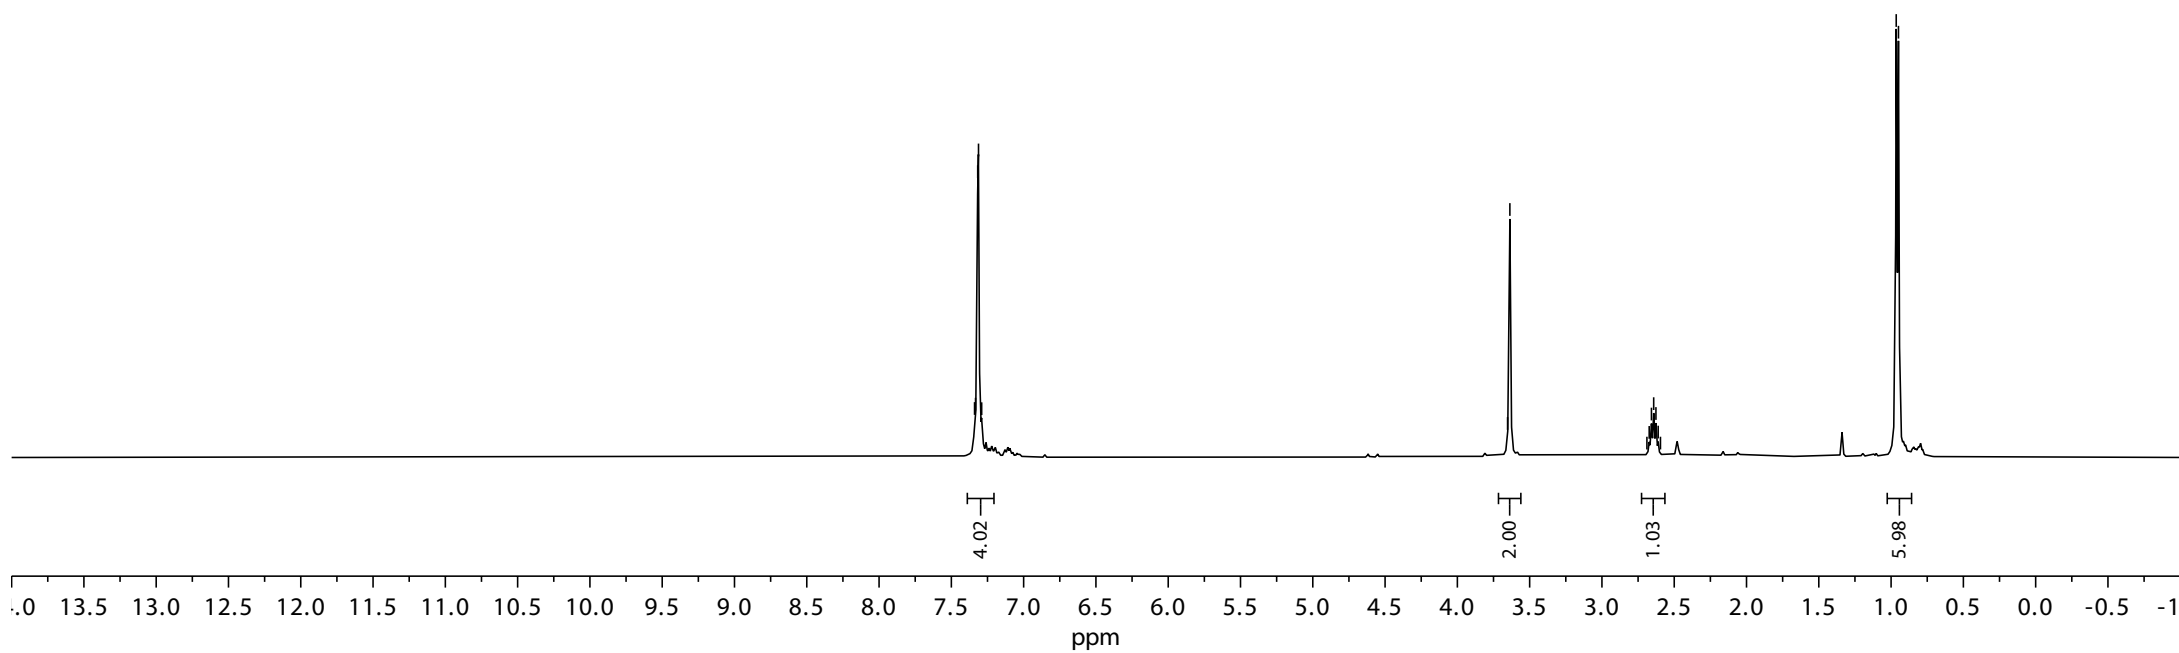



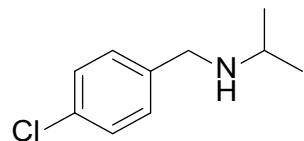

*N*-(4-chlorobenzyl)propan-2-amine  
**3m**

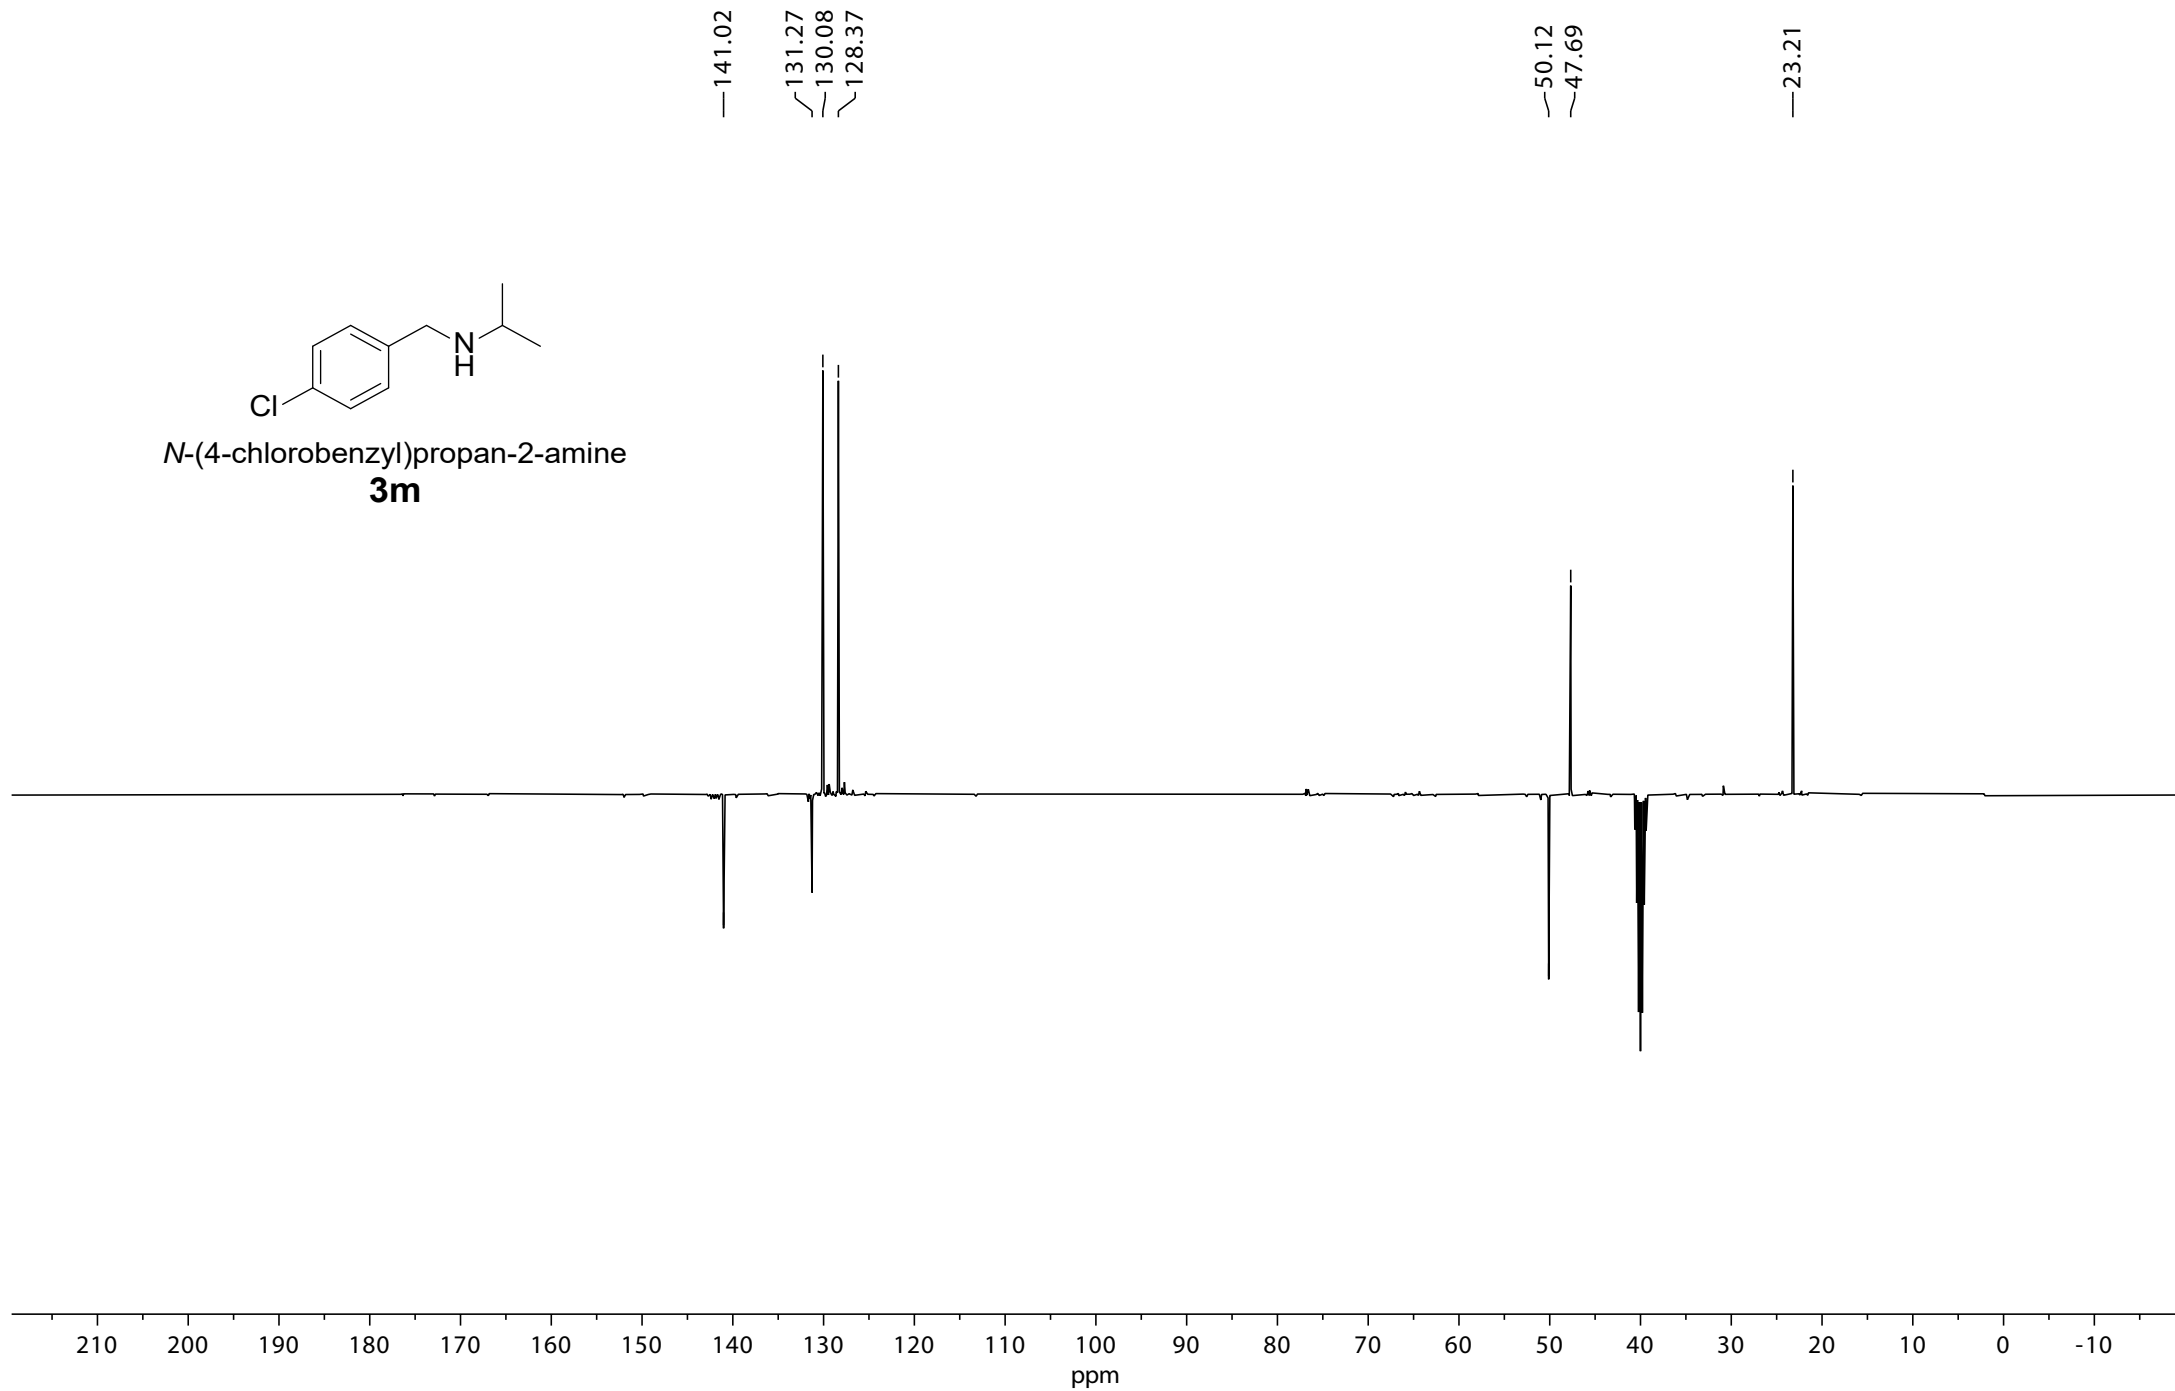

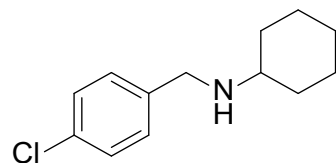

*N*-(4-chlorobenzyl)cyclohexanamine  
**3n**

7.30  
7.28  
7.27  
7.25

3.79  
2.50  
2.49  
2.48  
2.48  
2.47  
2.46  
2.45  
2.44  
2.43  
1.93  
1.92  
1.90  
1.89  
1.77  
1.76  
1.75  
1.74  
1.73  
1.72  
1.37  
1.28  
1.28  
1.27  
1.25  
1.24  
1.24  
1.22  
1.21  
1.19  
1.18  
1.16  
1.16  
1.13  
1.11  
1.10

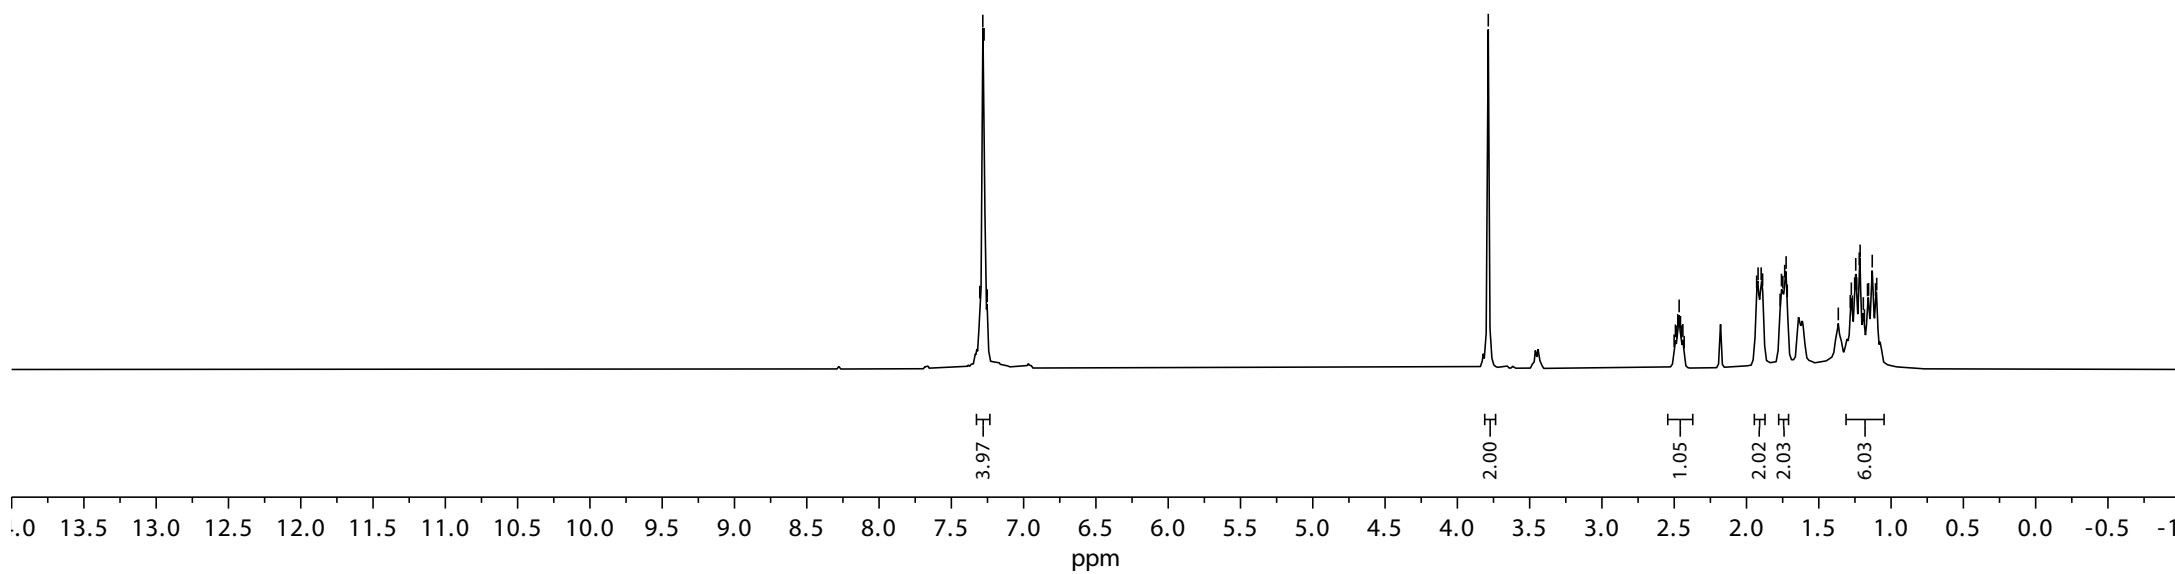

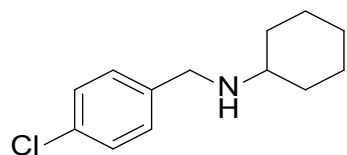

*N*-(4-chlorobenzyl)cyclohexanamine  
**3n**

— 139.55

— 132.40

— 129.41

— 128.46

— 56.15

— 50.28

— 33.57

— 26.17

— 25.00

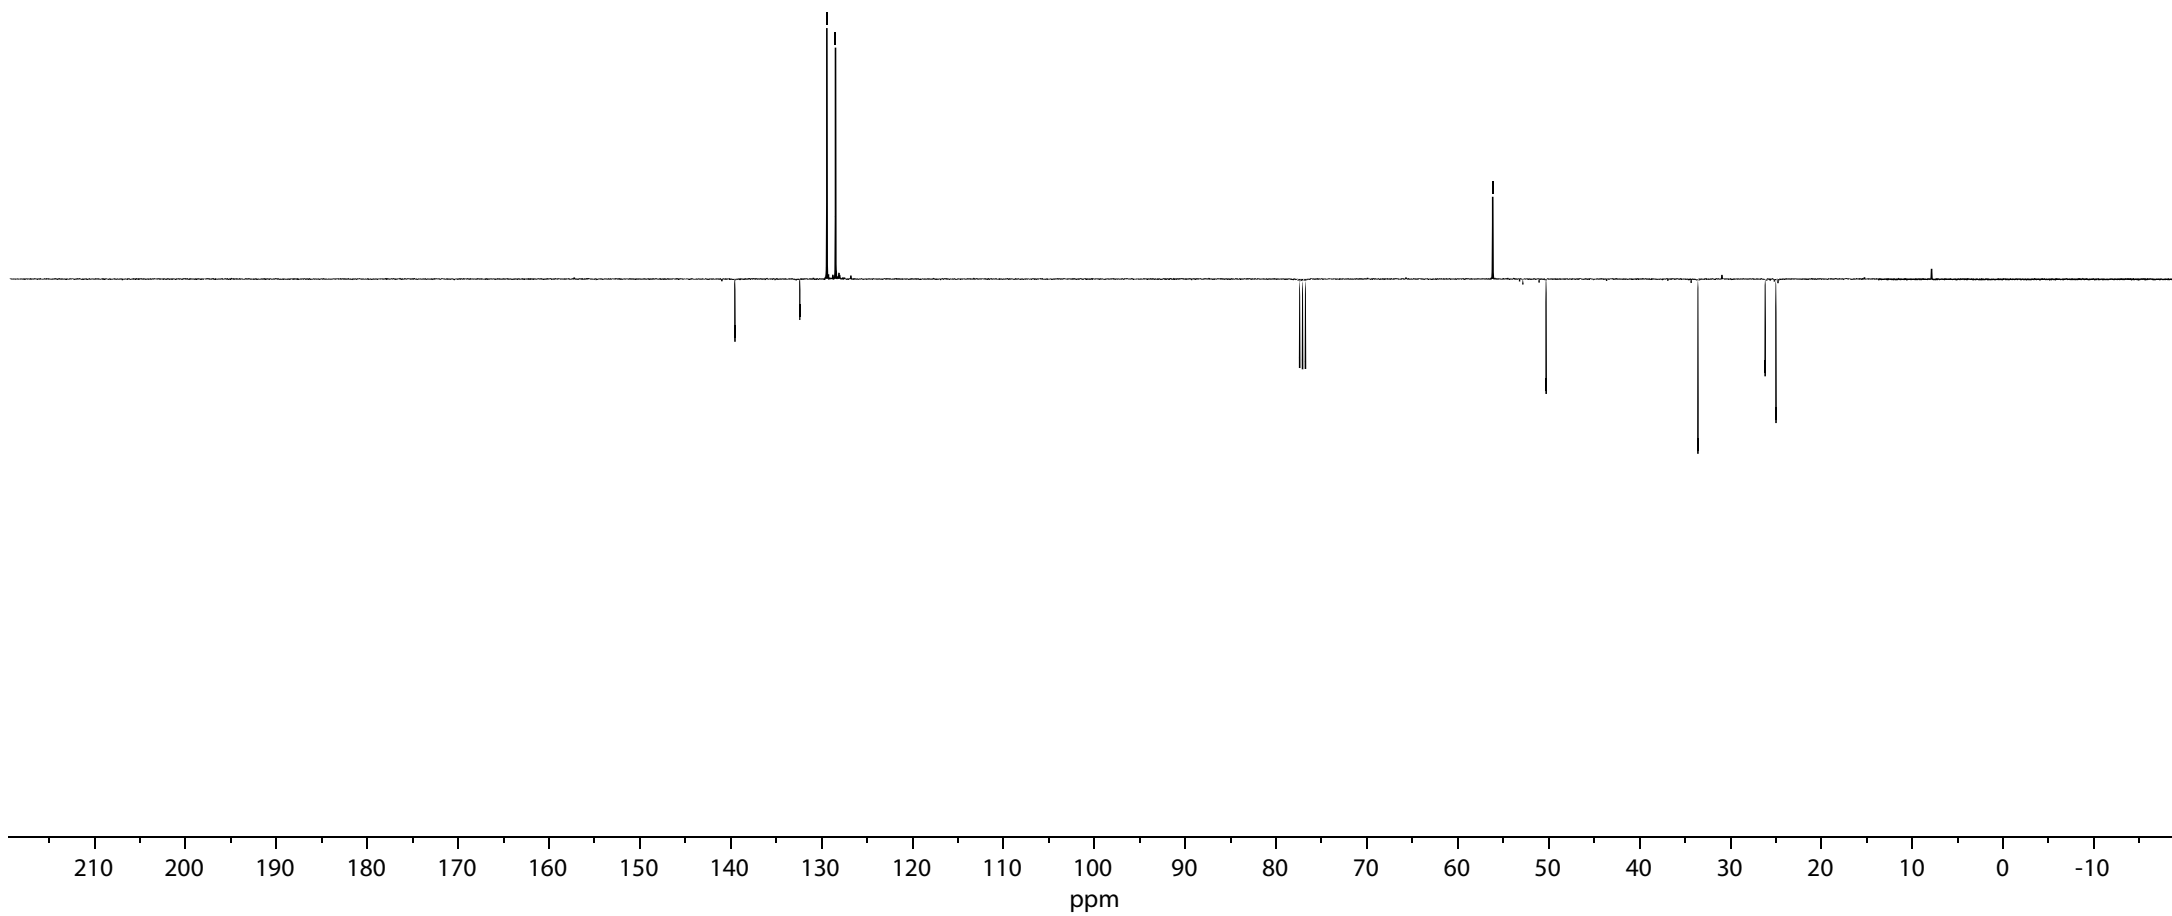

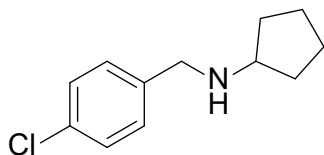

*N*-(4-chlorobenzyl)cyclopentanamine  
**3o**

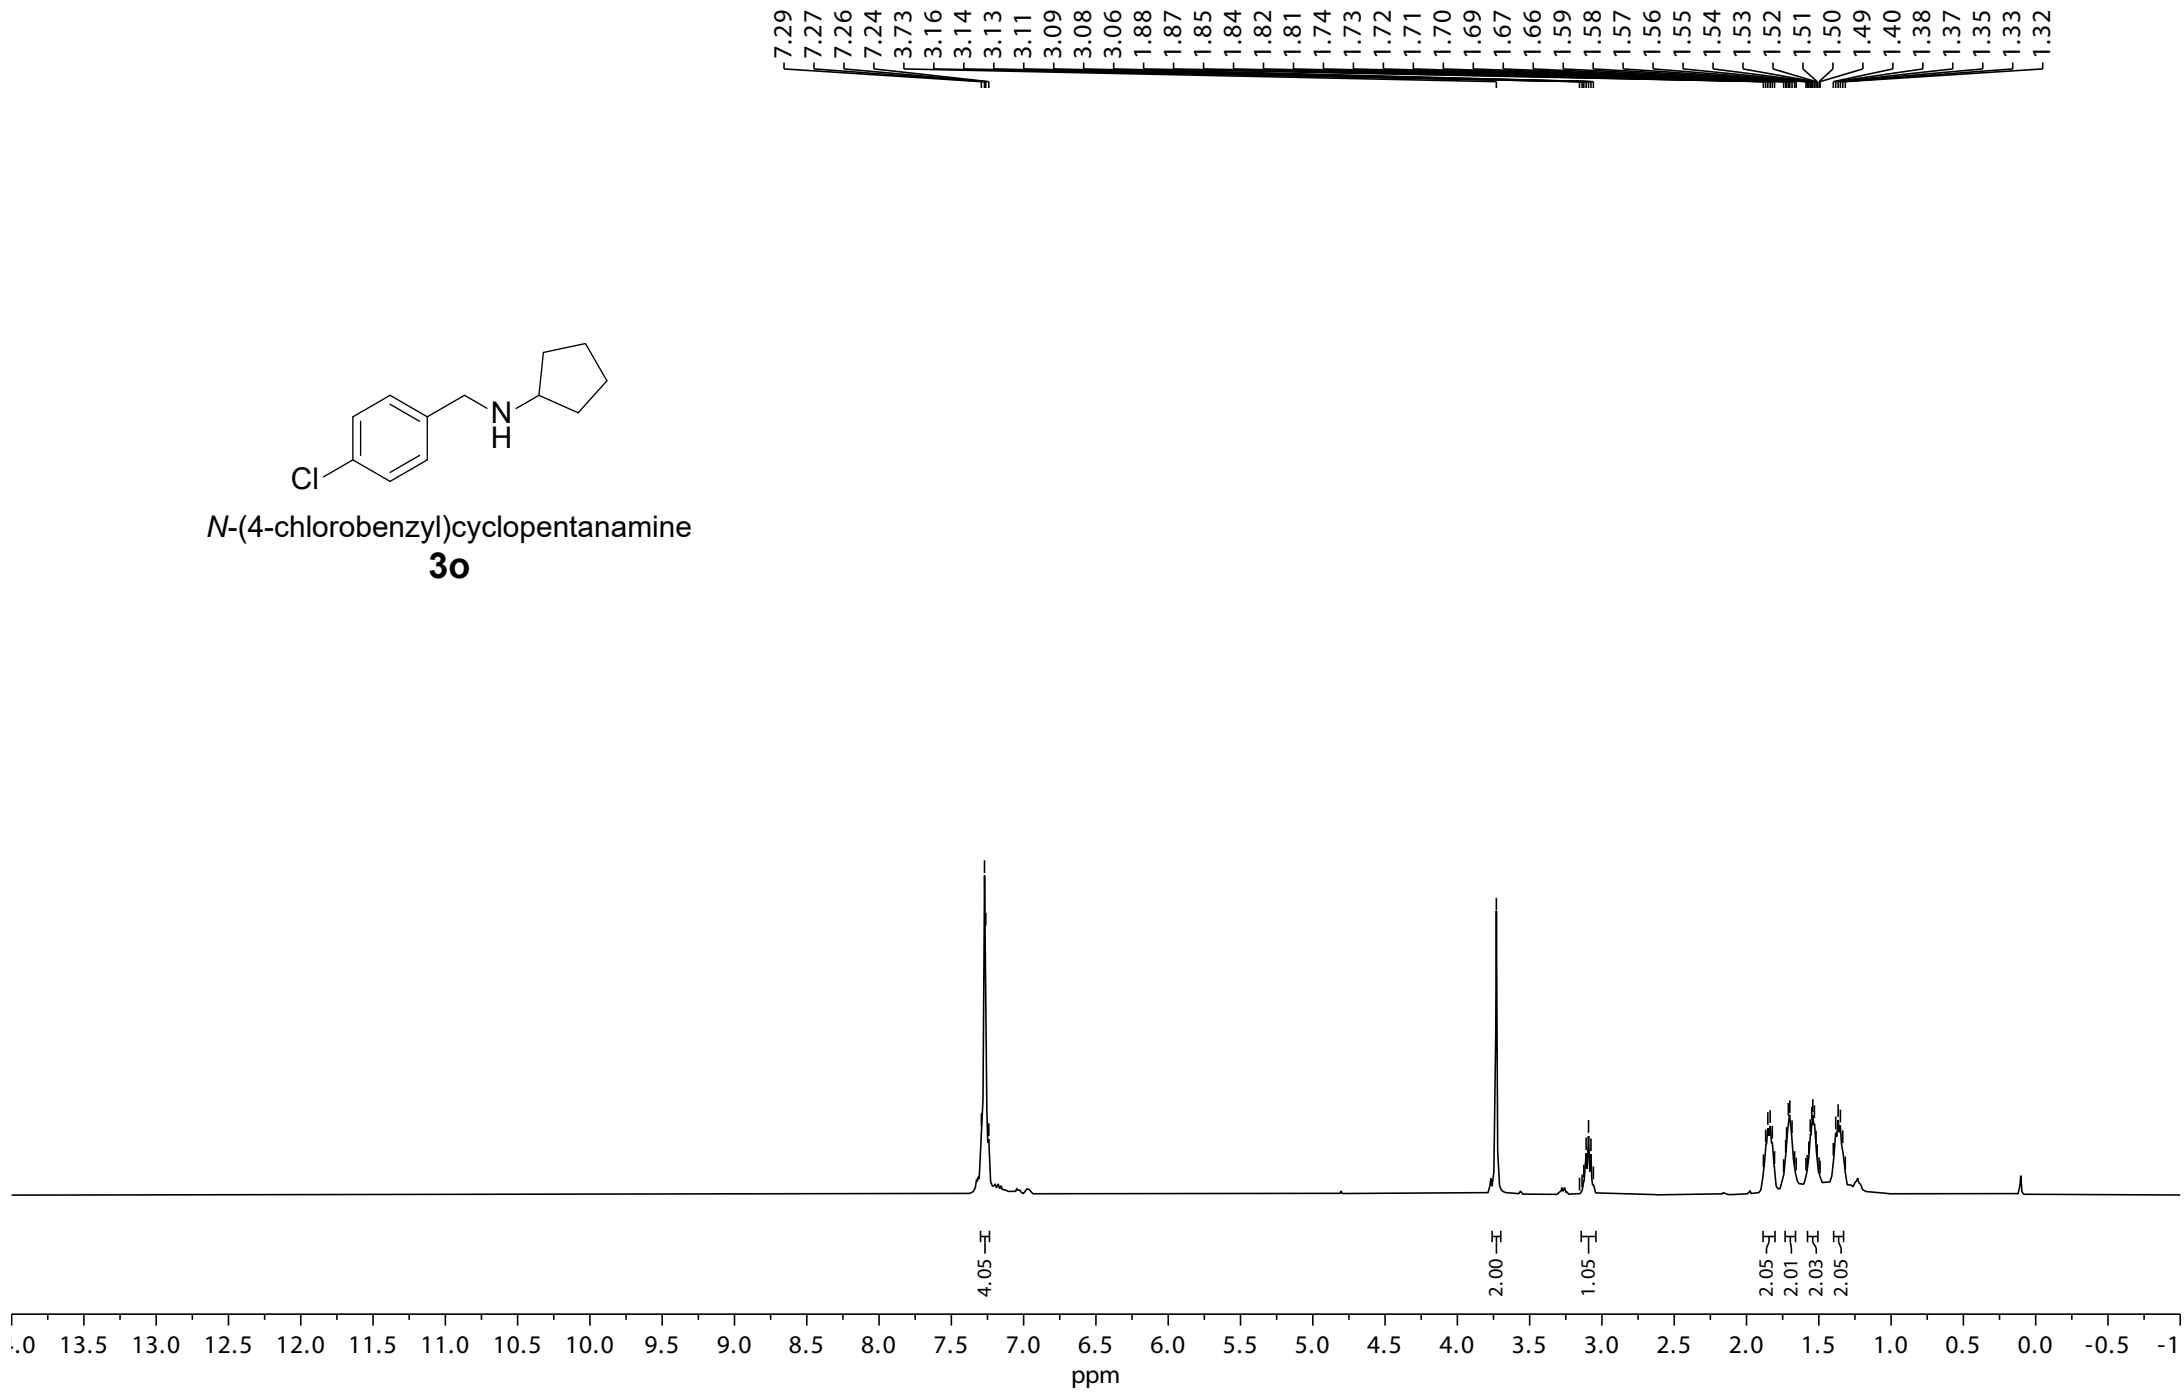

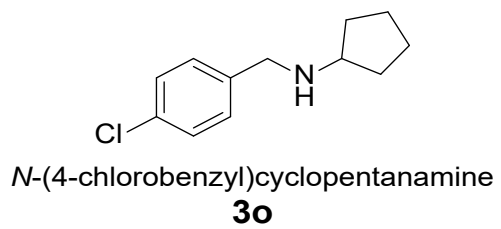

—139.30

—132.46

—129.50

—128.43

—59.19

—51.99

—33.17

—24.08

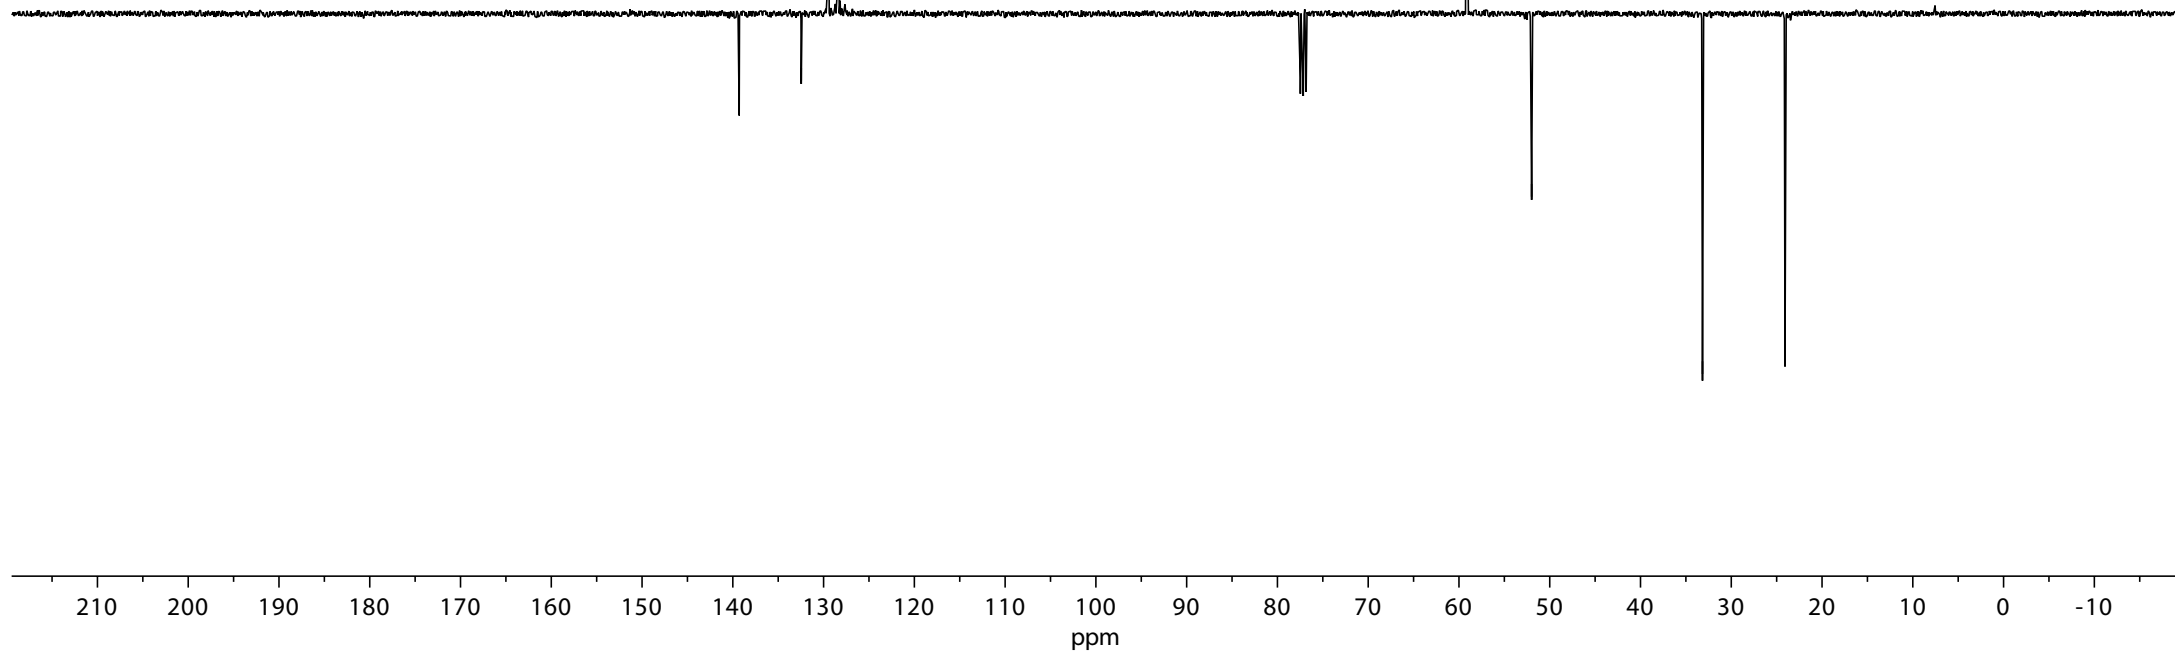

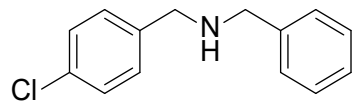

*N*-benzyl-1-(4-chlorophenyl)methanamine  
**3p**

7.40  
7.39  
7.38  
7.37  
7.36  
7.35  
7.35  
7.34  
7.33  
7.32  
7.30  
7.29  
7.29  
7.26

3.82  
3.80

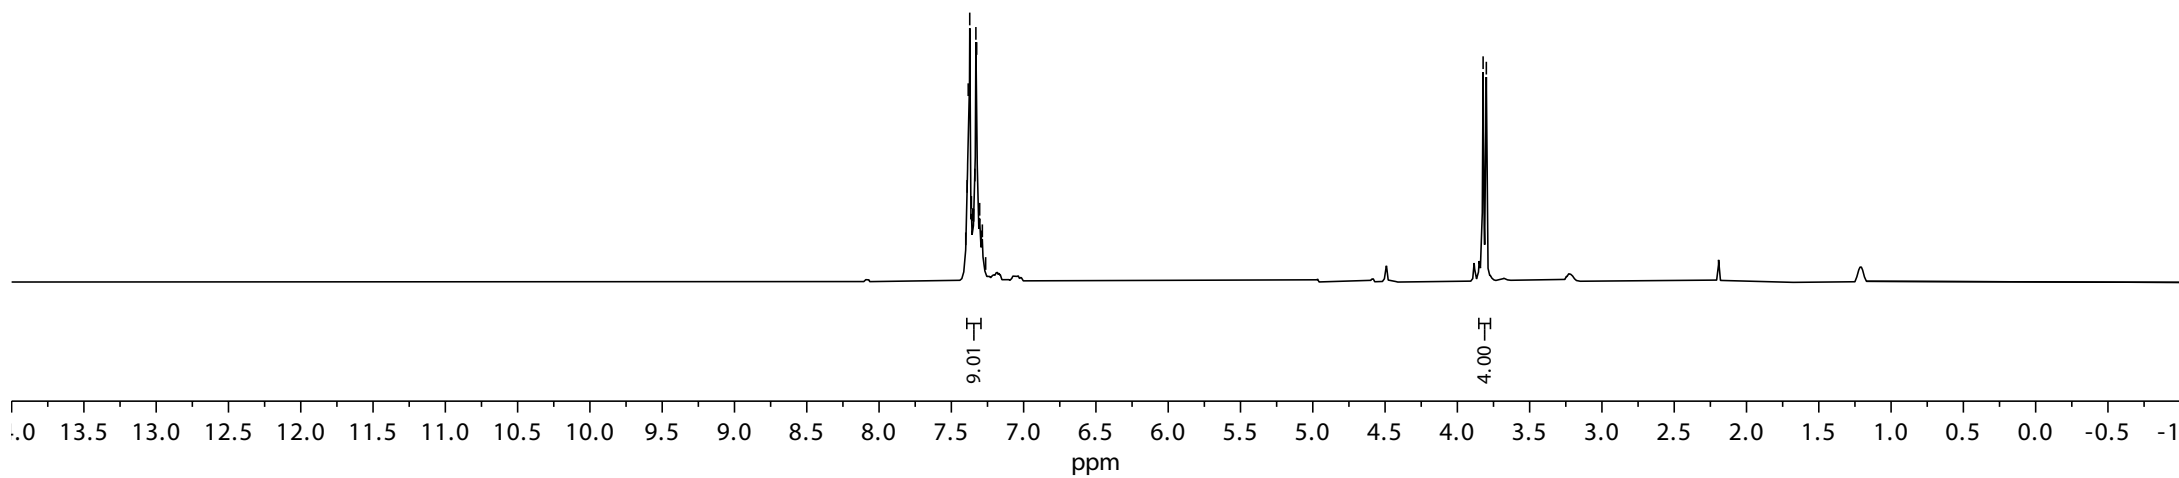

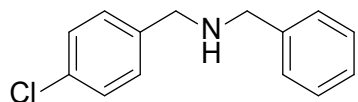

*N*-benzyl-1-(4-chlorophenyl)methanamine

**3p**

140.18  
138.92  
132.61  
129.54  
128.52  
128.49  
128.19  
127.08

53.13  
52.39

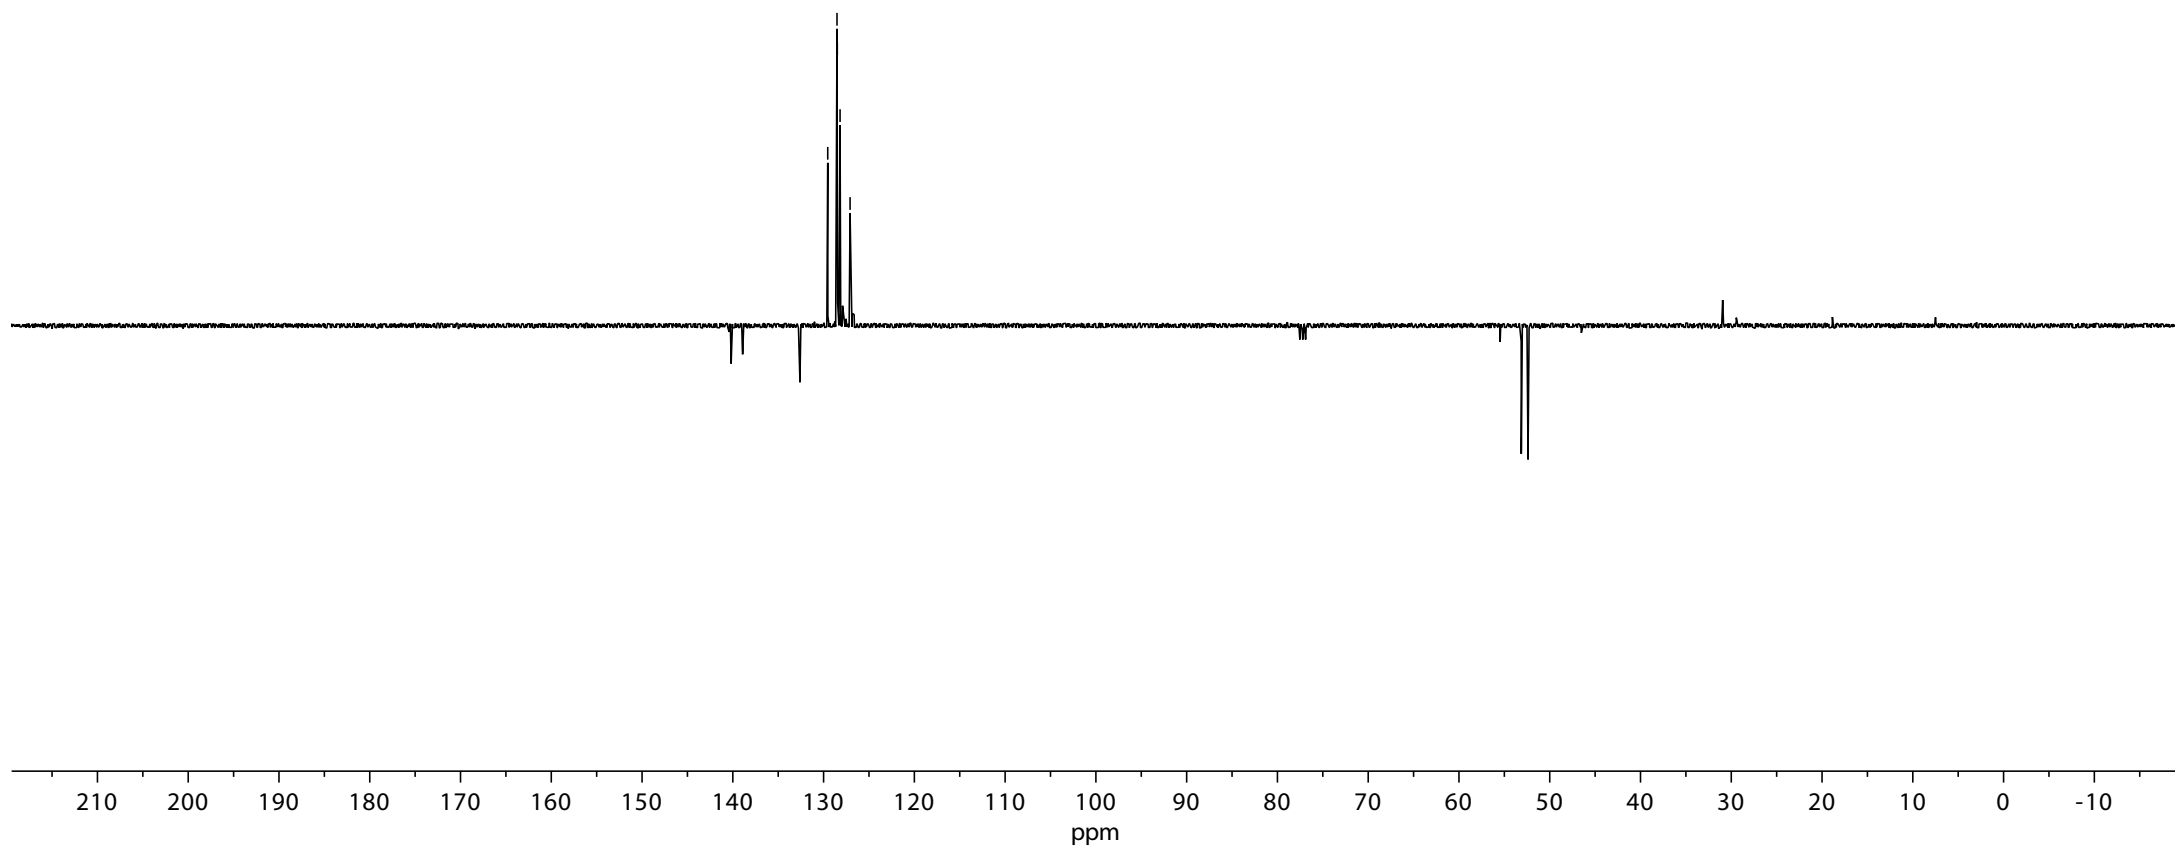

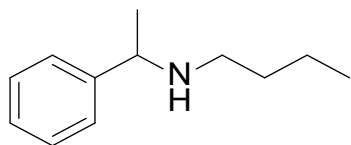

*N*-(1-phenylethyl)butan-1-amine  
**3q**

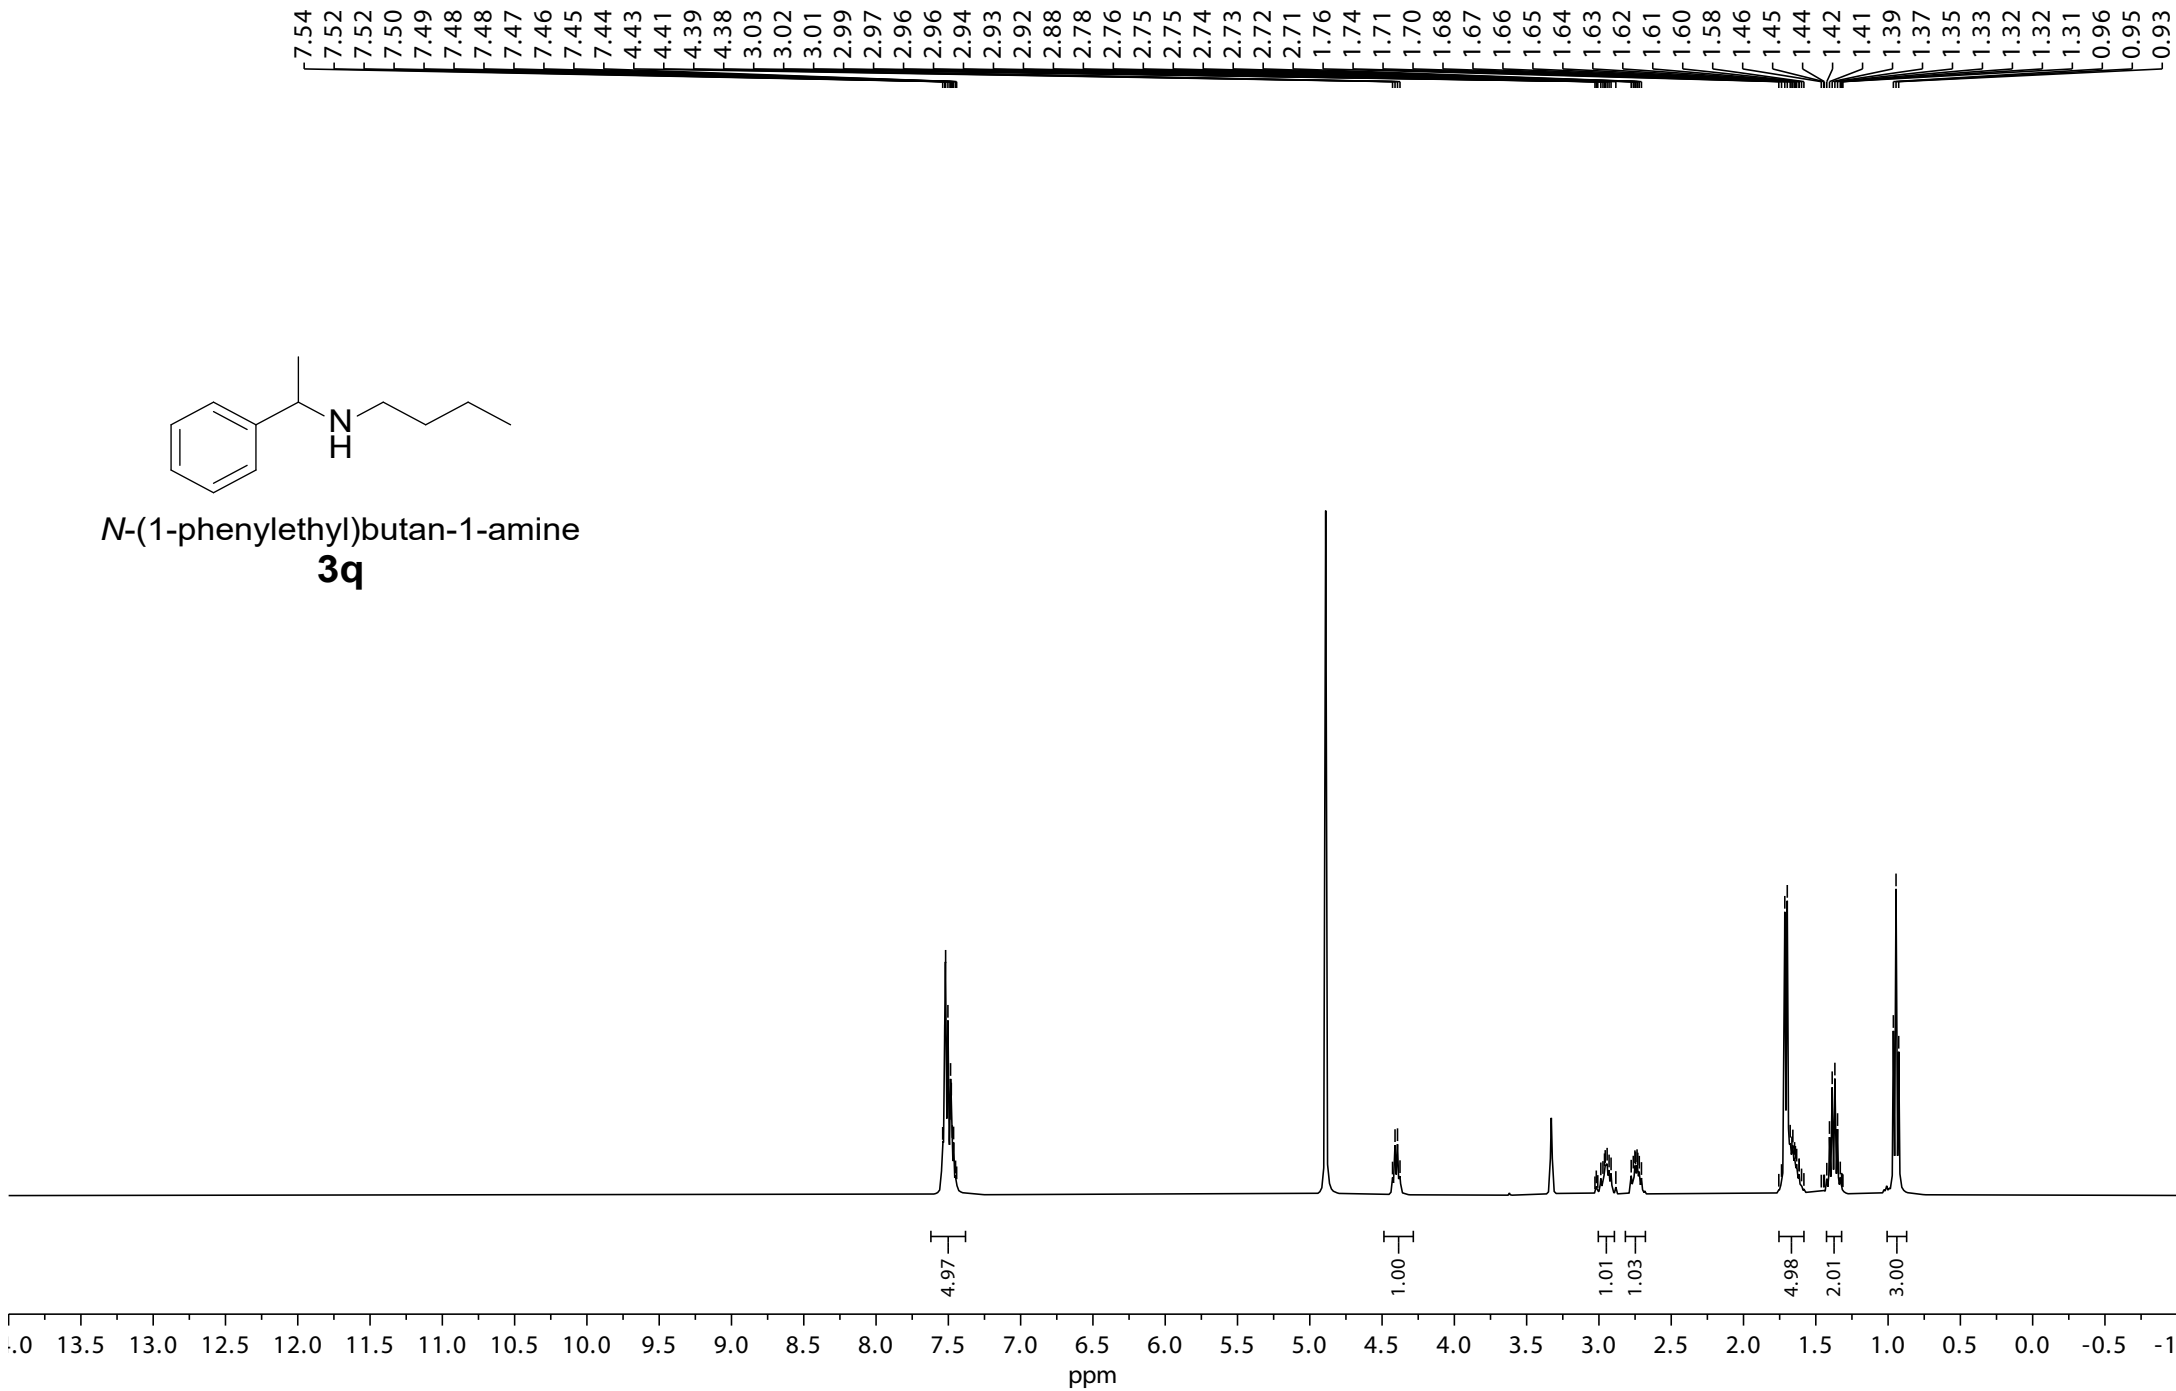



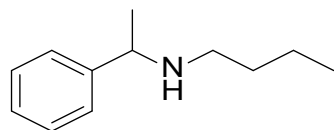

*N*-(1-phenylethyl)butan-1-amine  
**3q**

— 136.37  
— 129.29  
— 129.13  
— 127.27

— 58.25

— 45.45

— 27.83

— 19.44  
— 18.28  
— 12.43

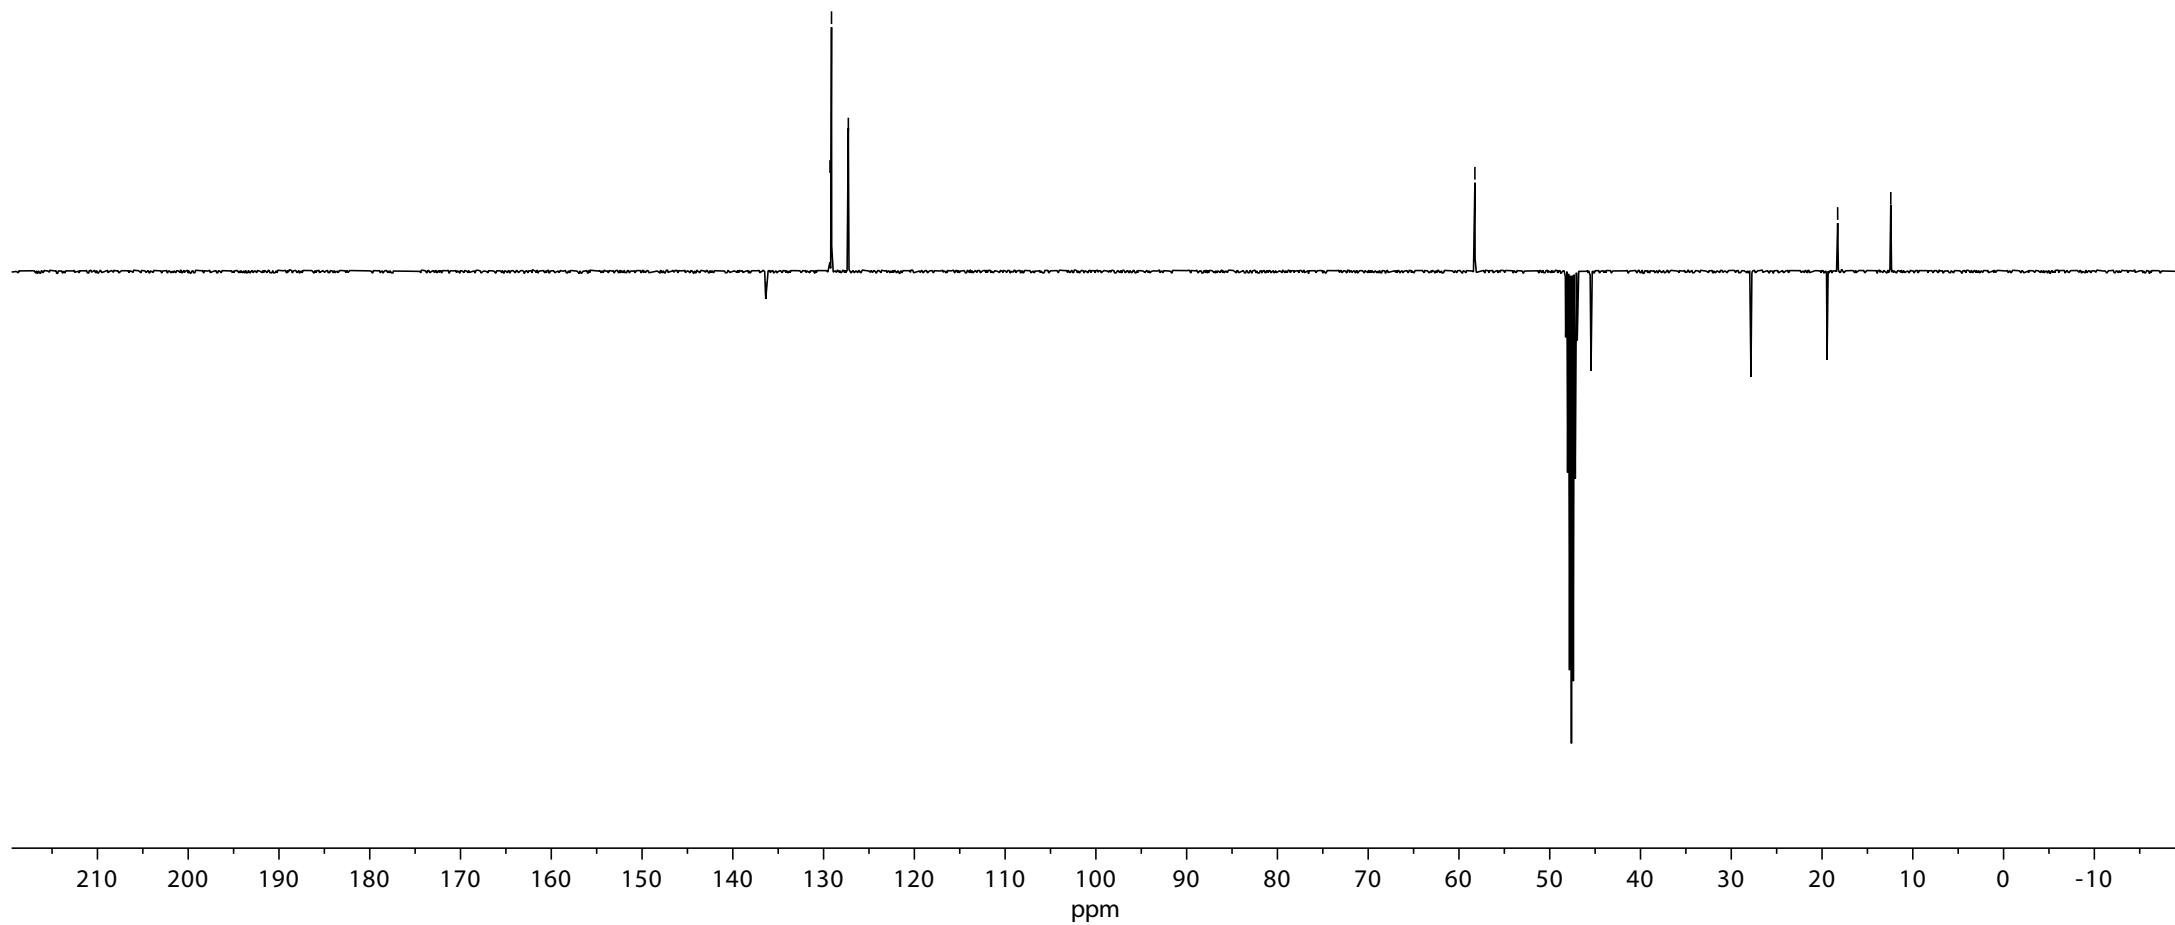

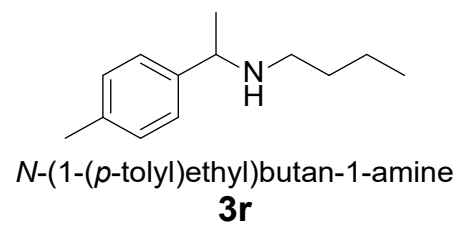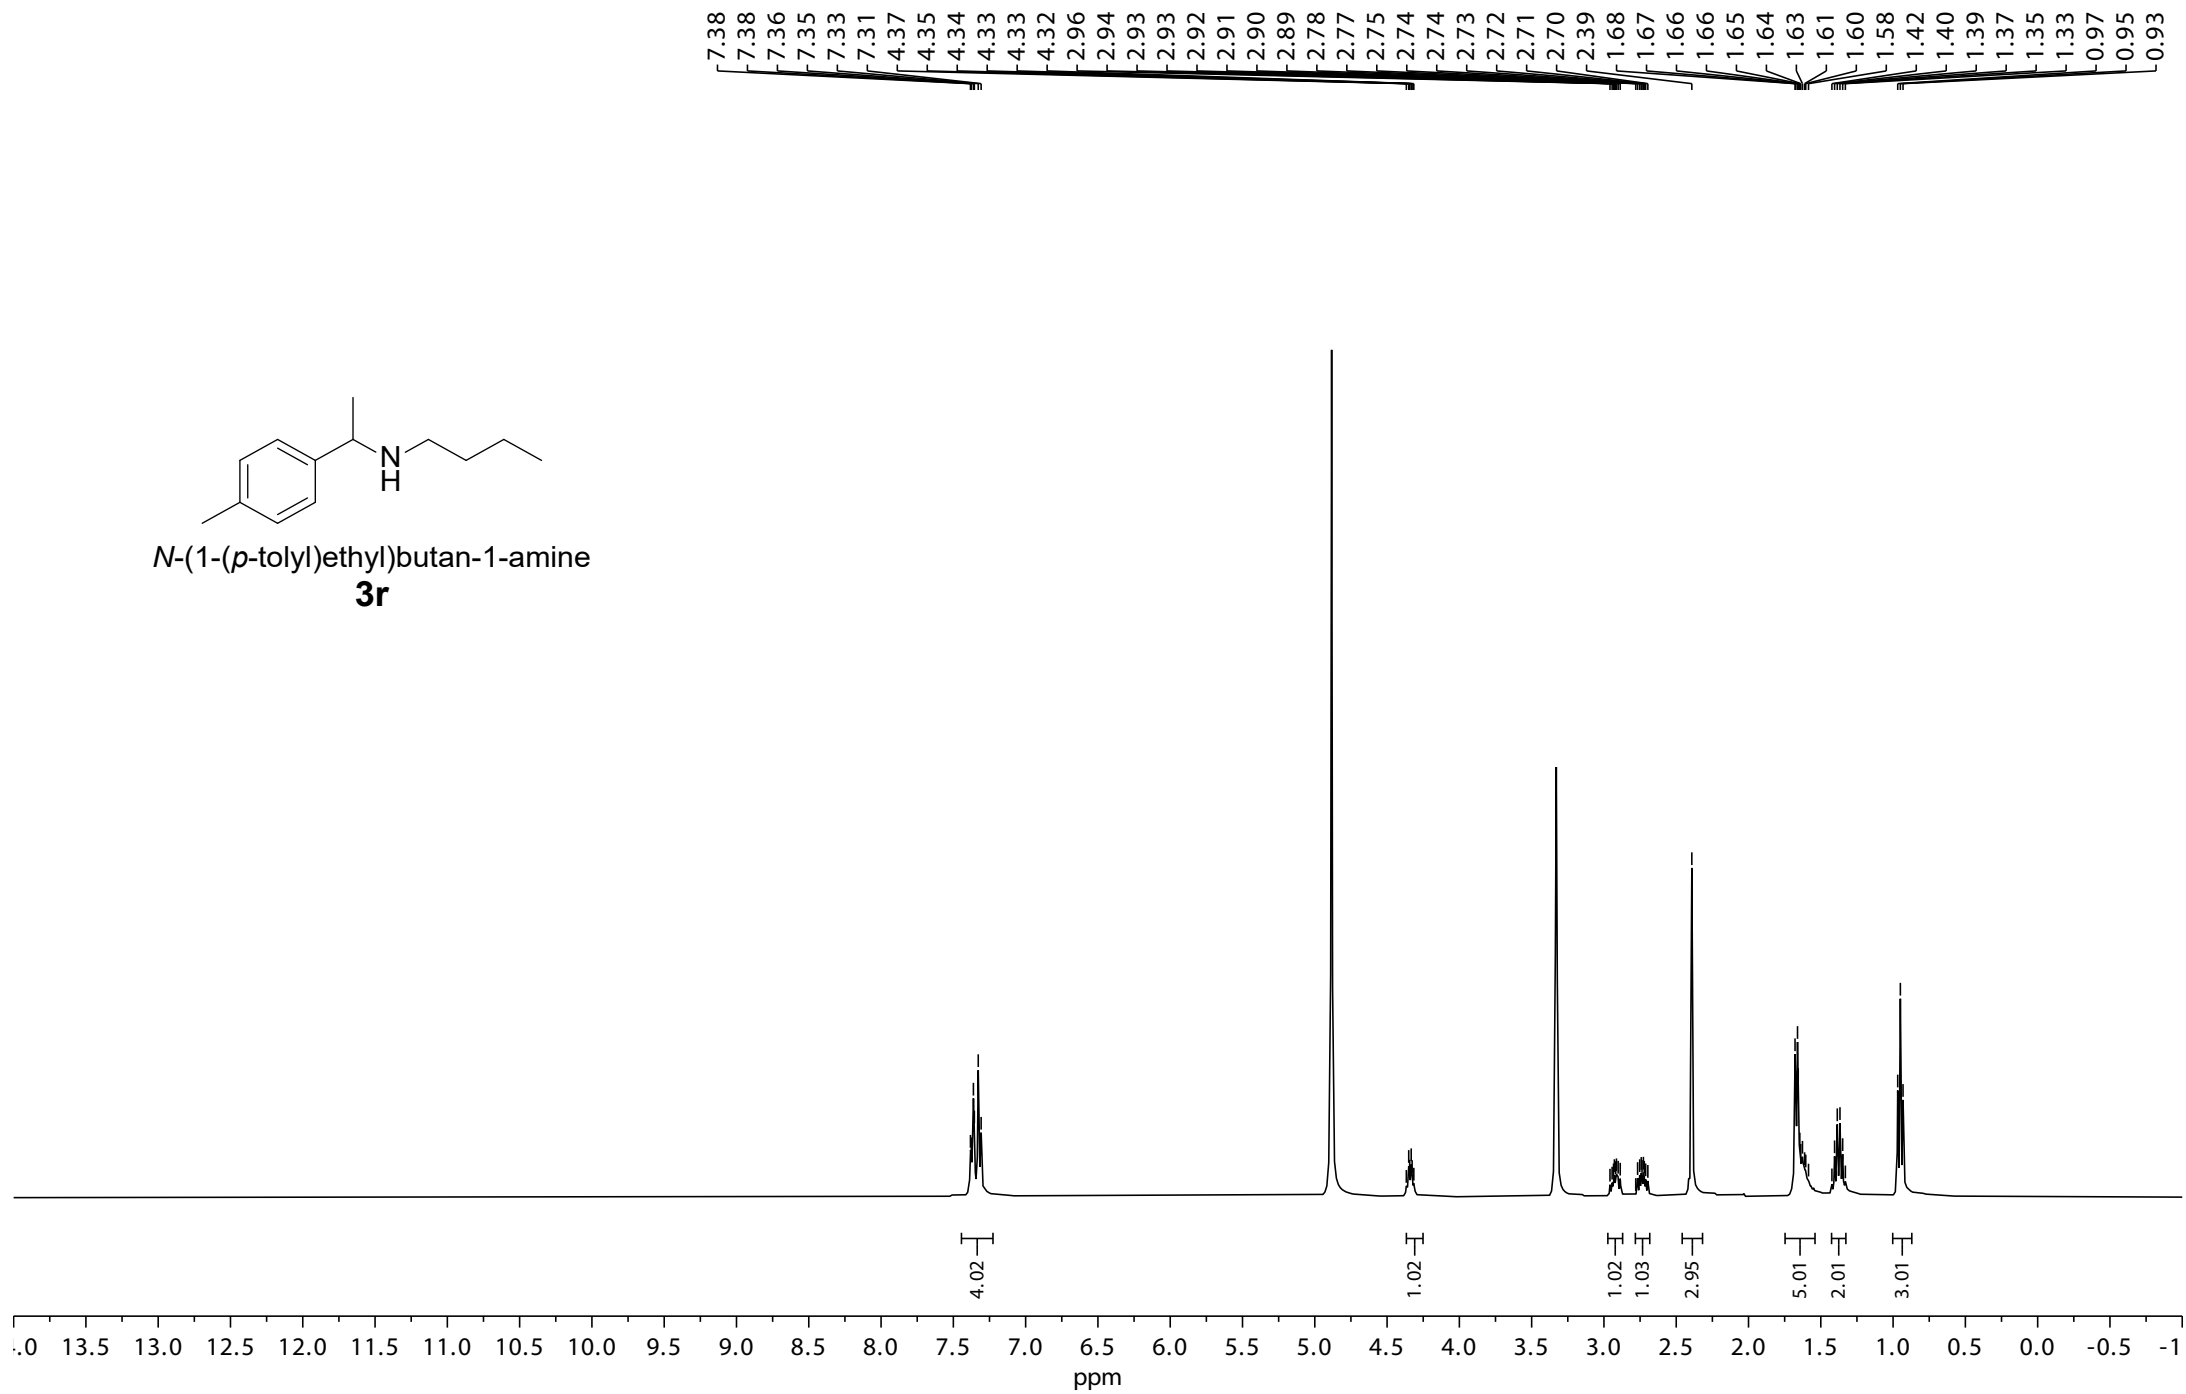

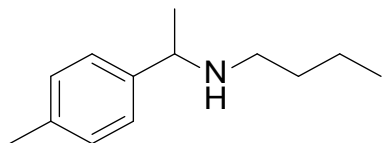

*N*-(1-(*p*-tolyl)ethyl)butan-1-amine  
**3r**

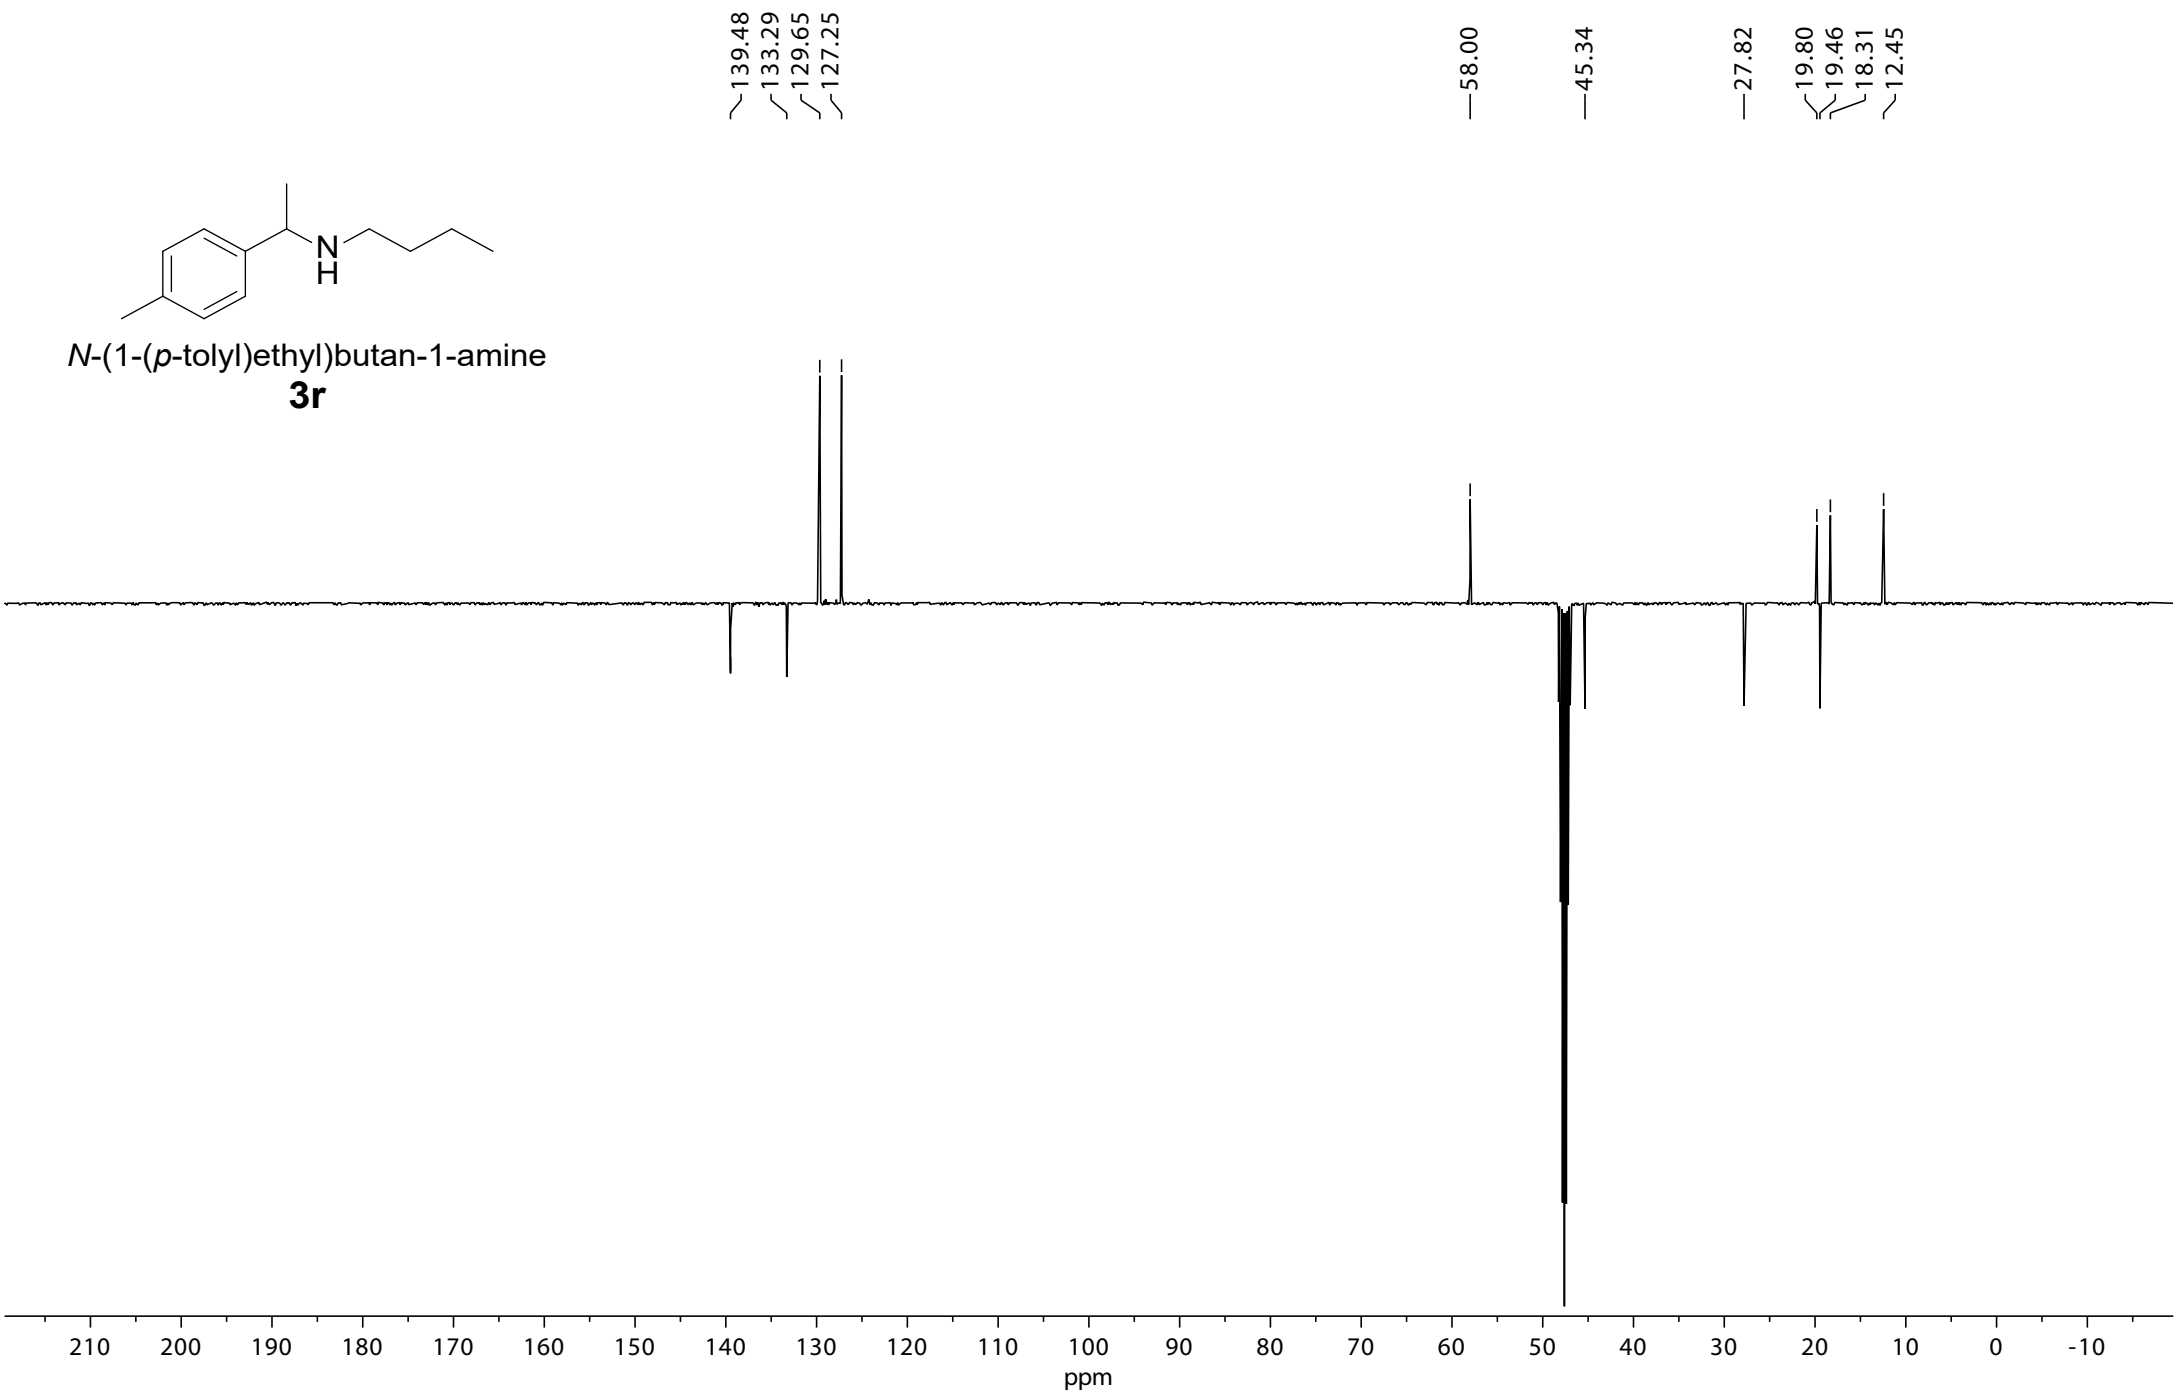

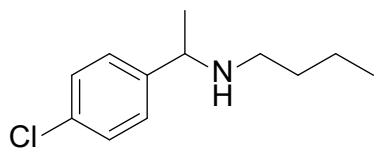

*N*-(1-(4-chlorophenyl)ethyl)butan-1-amine  
**3s**

7.57  
7.55  
7.54  
7.52  
7.50  
4.46  
4.45  
4.43  
4.43  
4.42  
4.40  
3.00  
2.99  
2.98  
2.97  
2.96  
2.96  
2.95  
2.93  
2.92  
2.79  
2.78  
2.76  
2.75  
2.75  
2.74  
2.72  
1.73  
1.71  
1.70  
1.69  
1.68  
1.66  
1.66  
1.64  
1.42  
1.40  
1.38  
1.36  
0.98  
0.96  
0.94

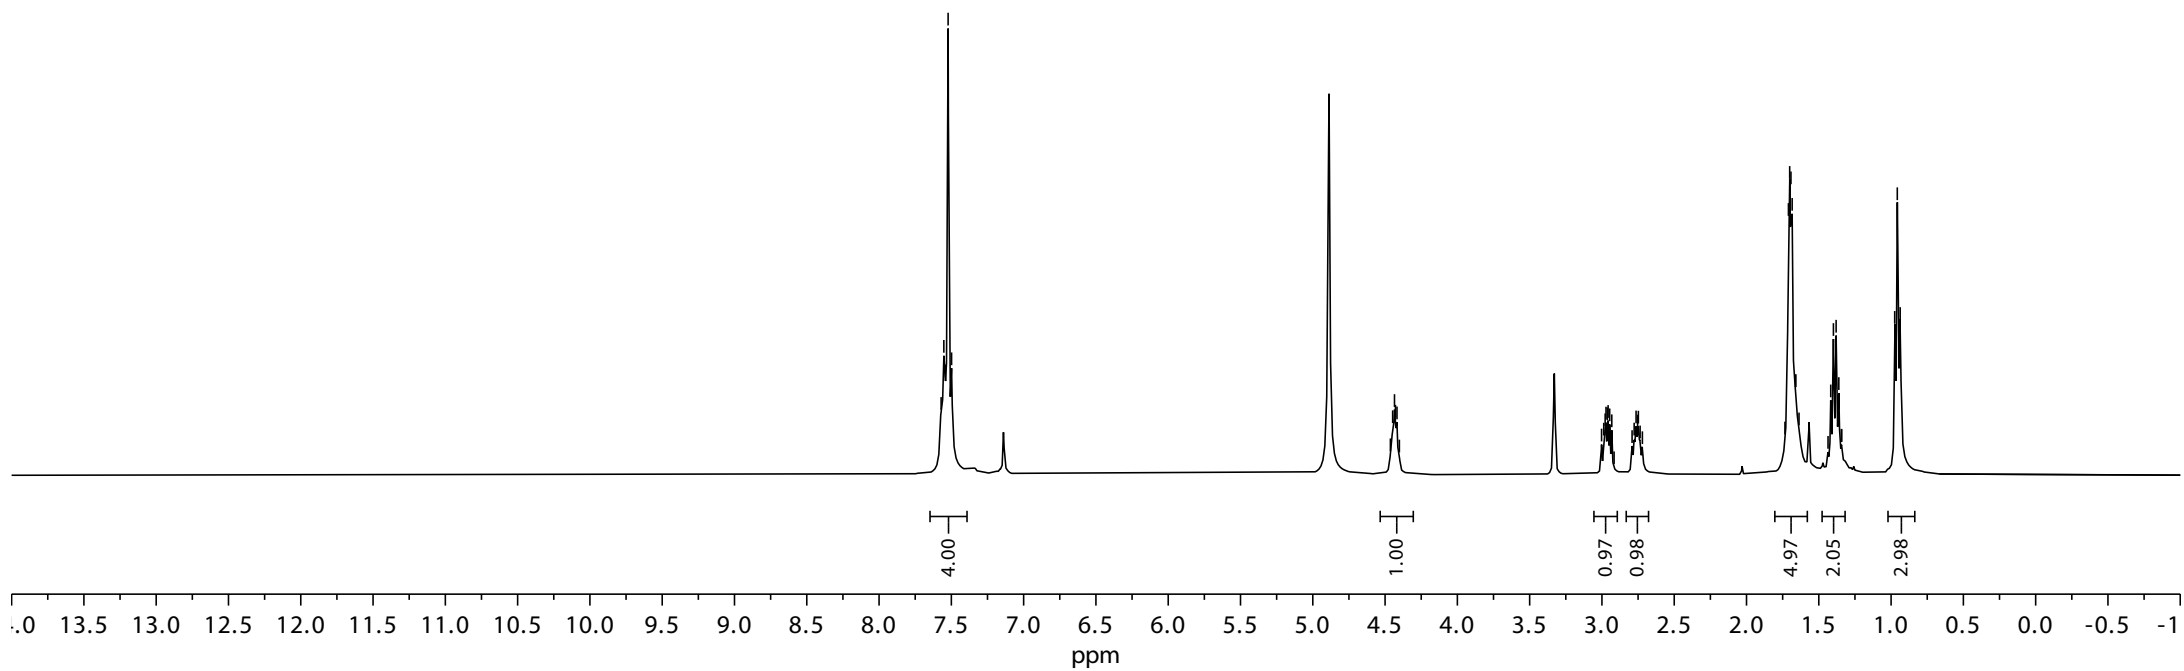

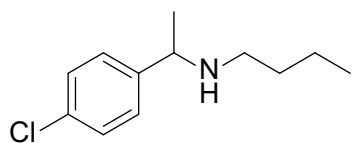

*N*-(1-(4-chlorophenyl)ethyl)butan-1-amine  
**3s**

135.21  
135.06  
129.33  
129.16

57.57

45.55

27.86

19.51  
18.31  
12.55

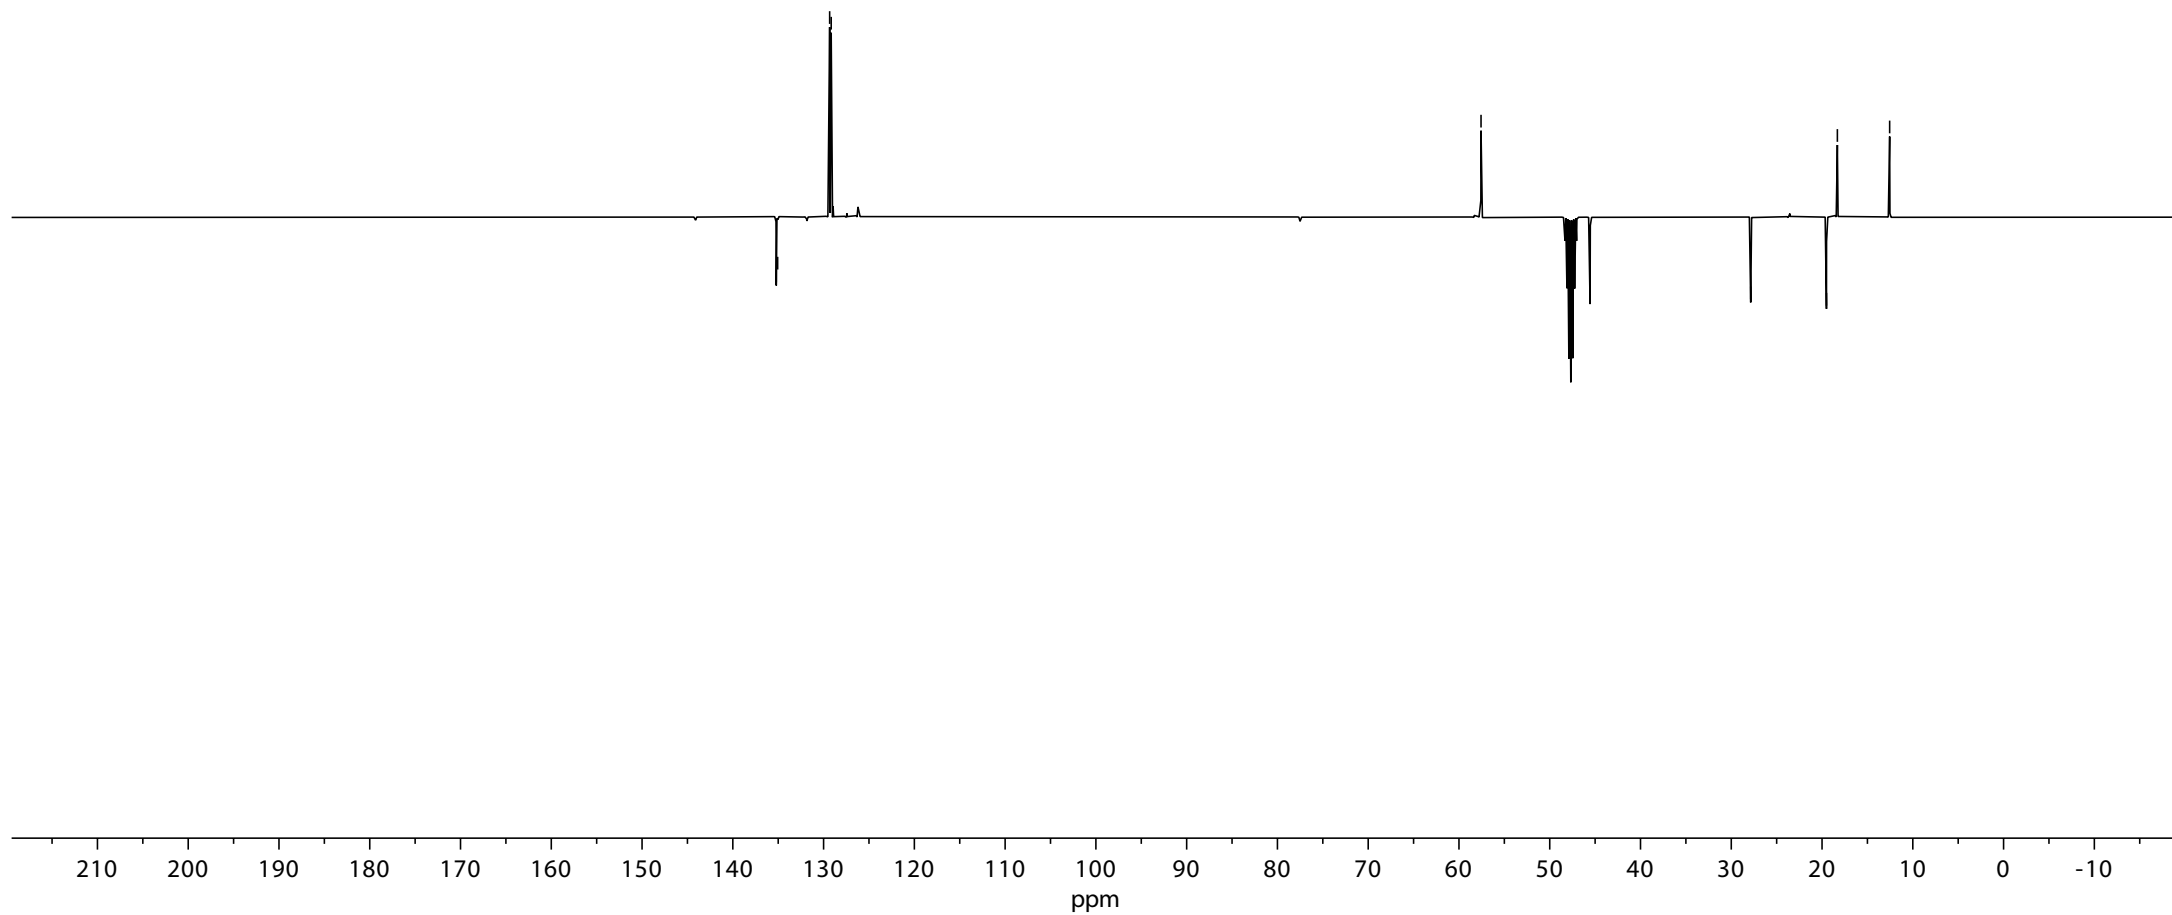

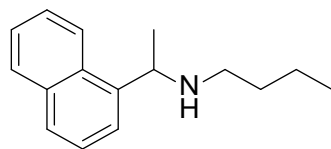

*N*-(1-(naphthalen-1-yl)ethyl)butan-1-amine  
**3t**

8.24  
8.22  
8.00  
7.98  
7.83  
7.81  
7.70  
7.68  
7.66  
7.64  
7.62  
7.60  
7.58

5.42  
5.41  
5.39  
5.37  
3.12  
3.11  
3.10  
3.09  
3.08  
3.07  
3.05  
2.90  
2.88  
2.87  
2.86  
2.85  
2.85  
2.83

1.83  
1.81  
1.74  
1.72  
1.72  
1.71  
1.70  
1.69  
1.68  
1.39  
1.37  
1.35  
1.33  
0.94  
0.92

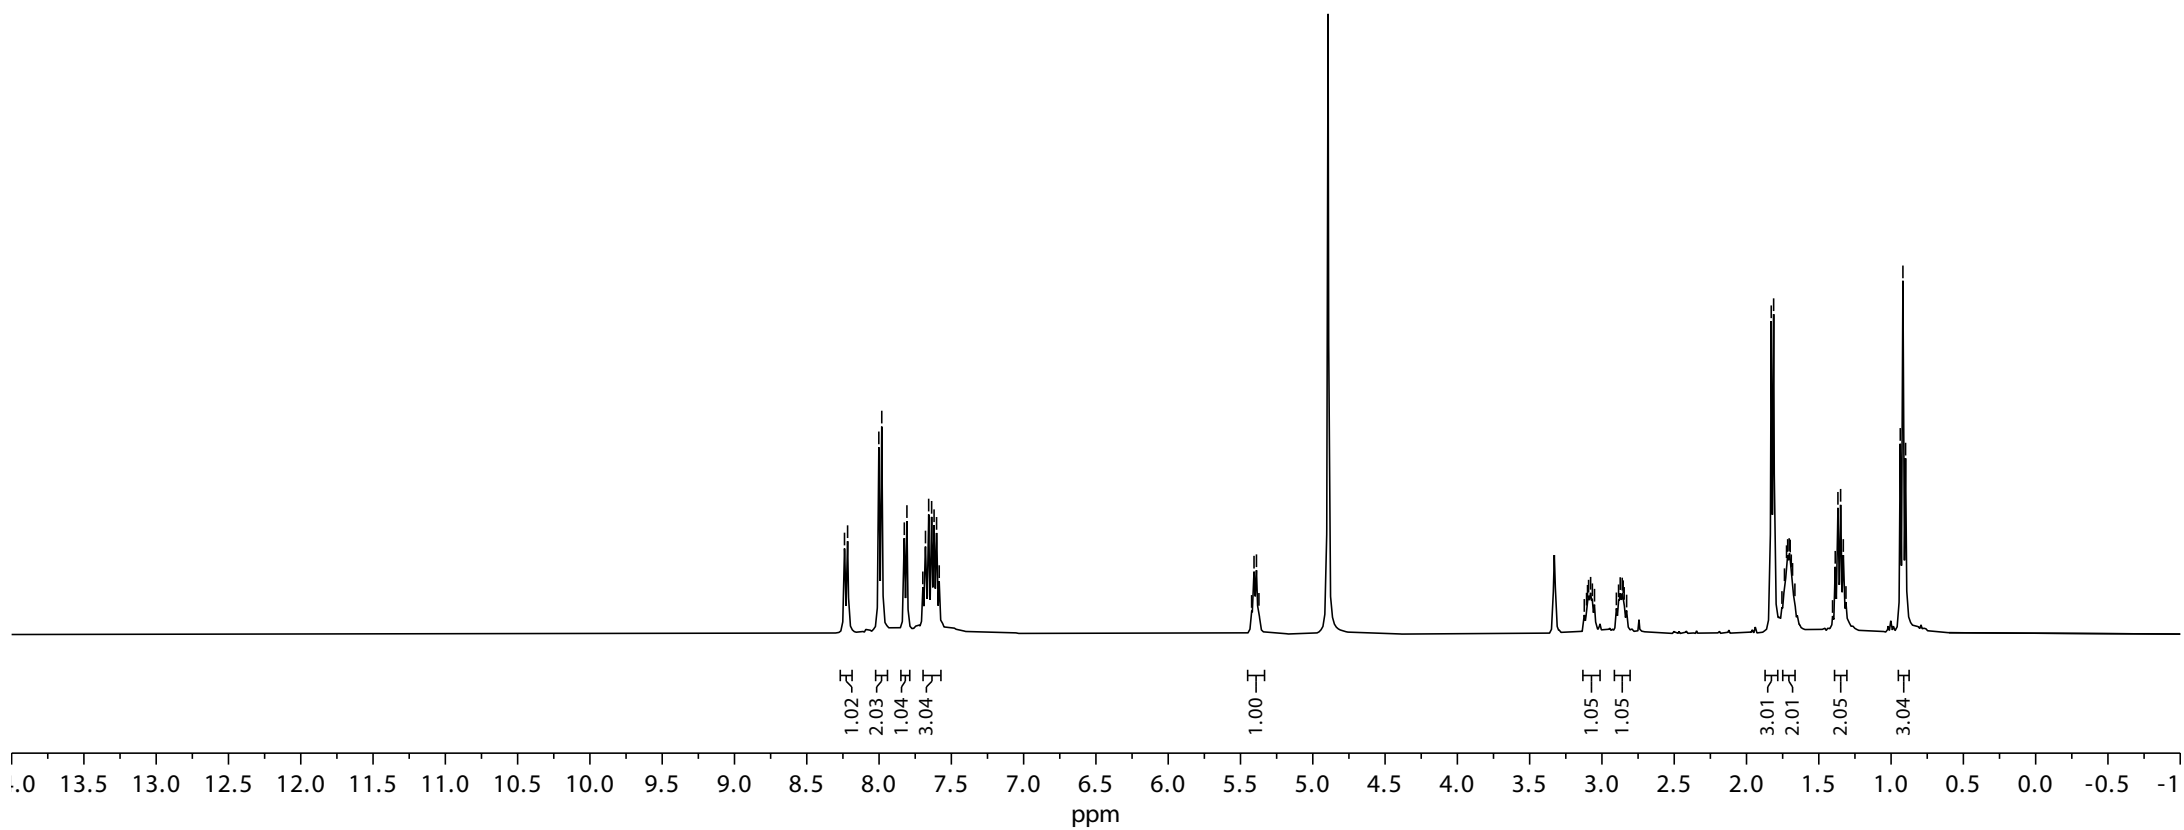

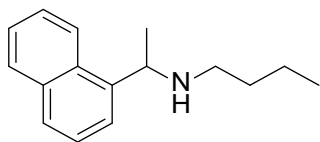

*N*-(1-(naphthalen-1-yl)ethyl)butan-1-amine  
**3t**

134.12  
133.04  
130.70  
129.51  
128.97  
127.10  
126.16  
125.25  
123.51  
121.71

—52.83

—45.86

—27.96

—19.46

—18.79

—12.44

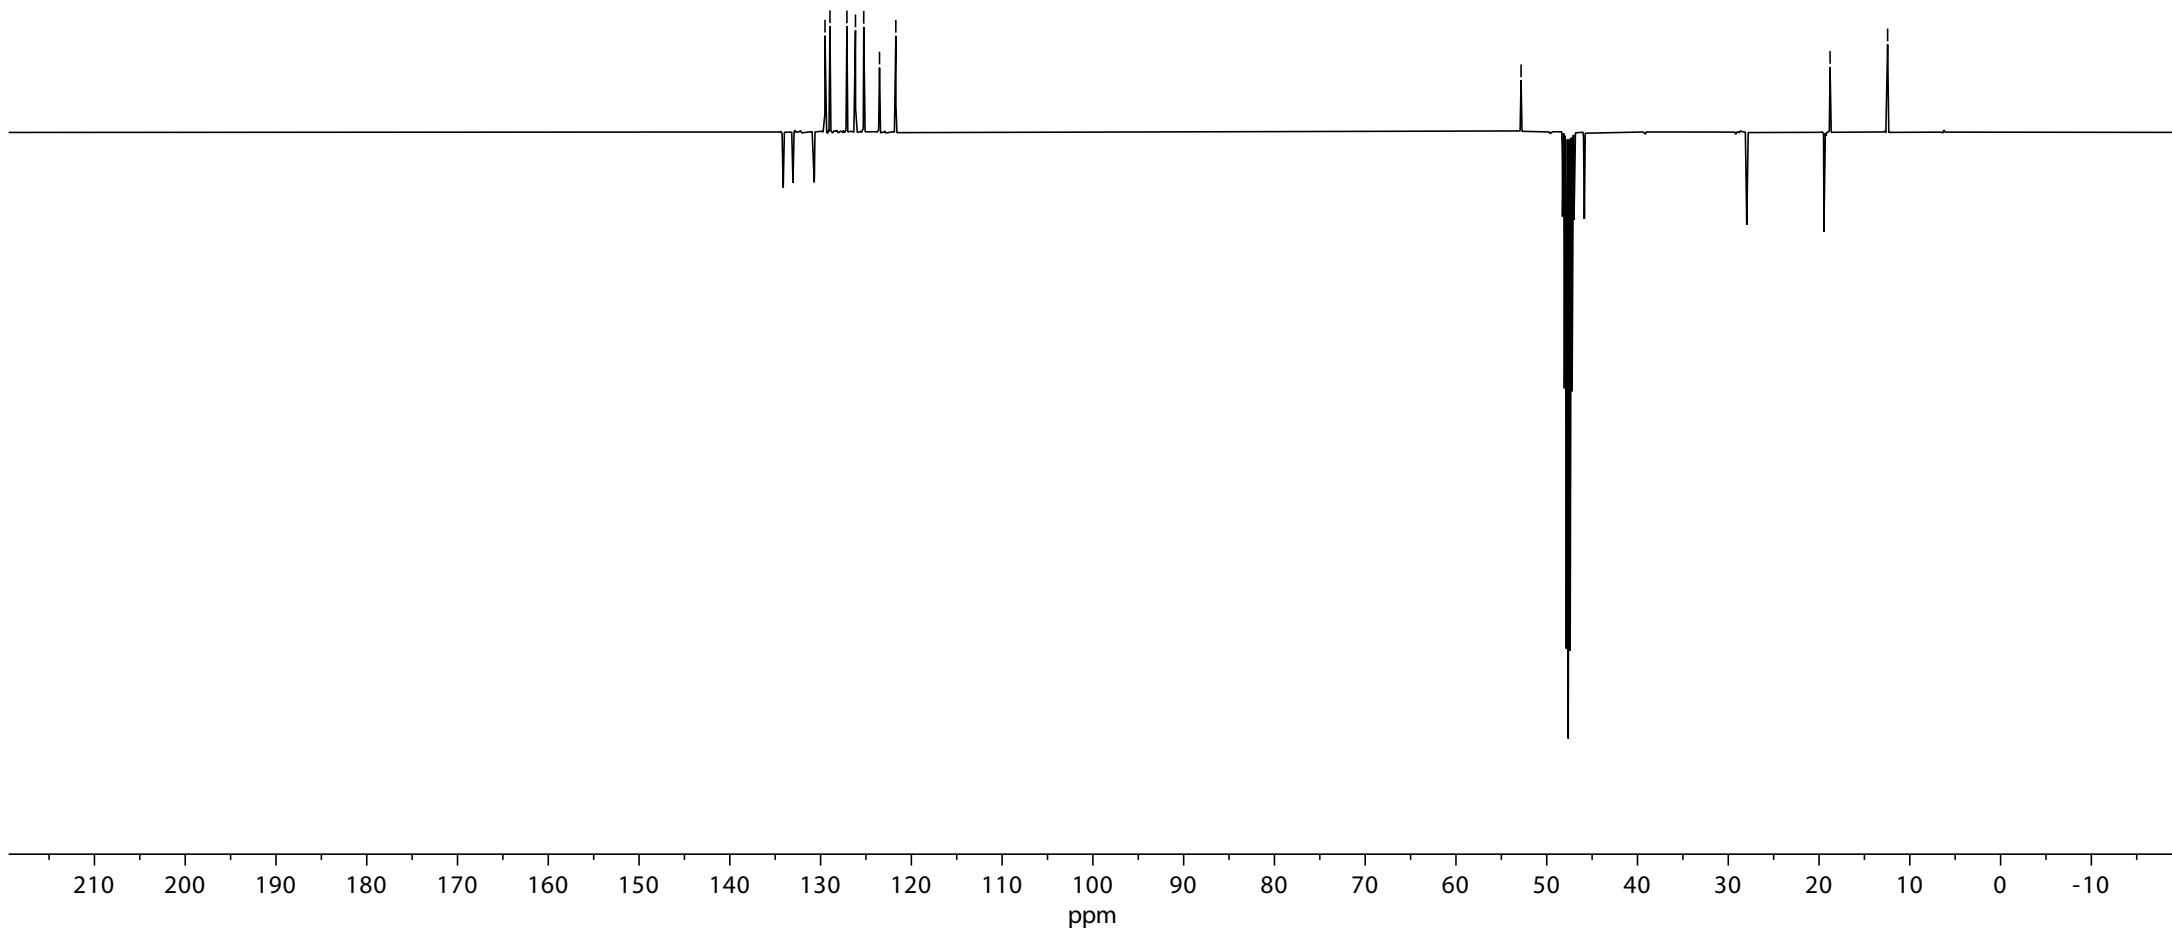

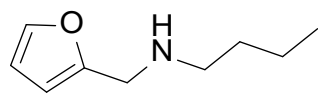

*N*-(furan-2-ylmethyl)butan-1-amine  
**3u**

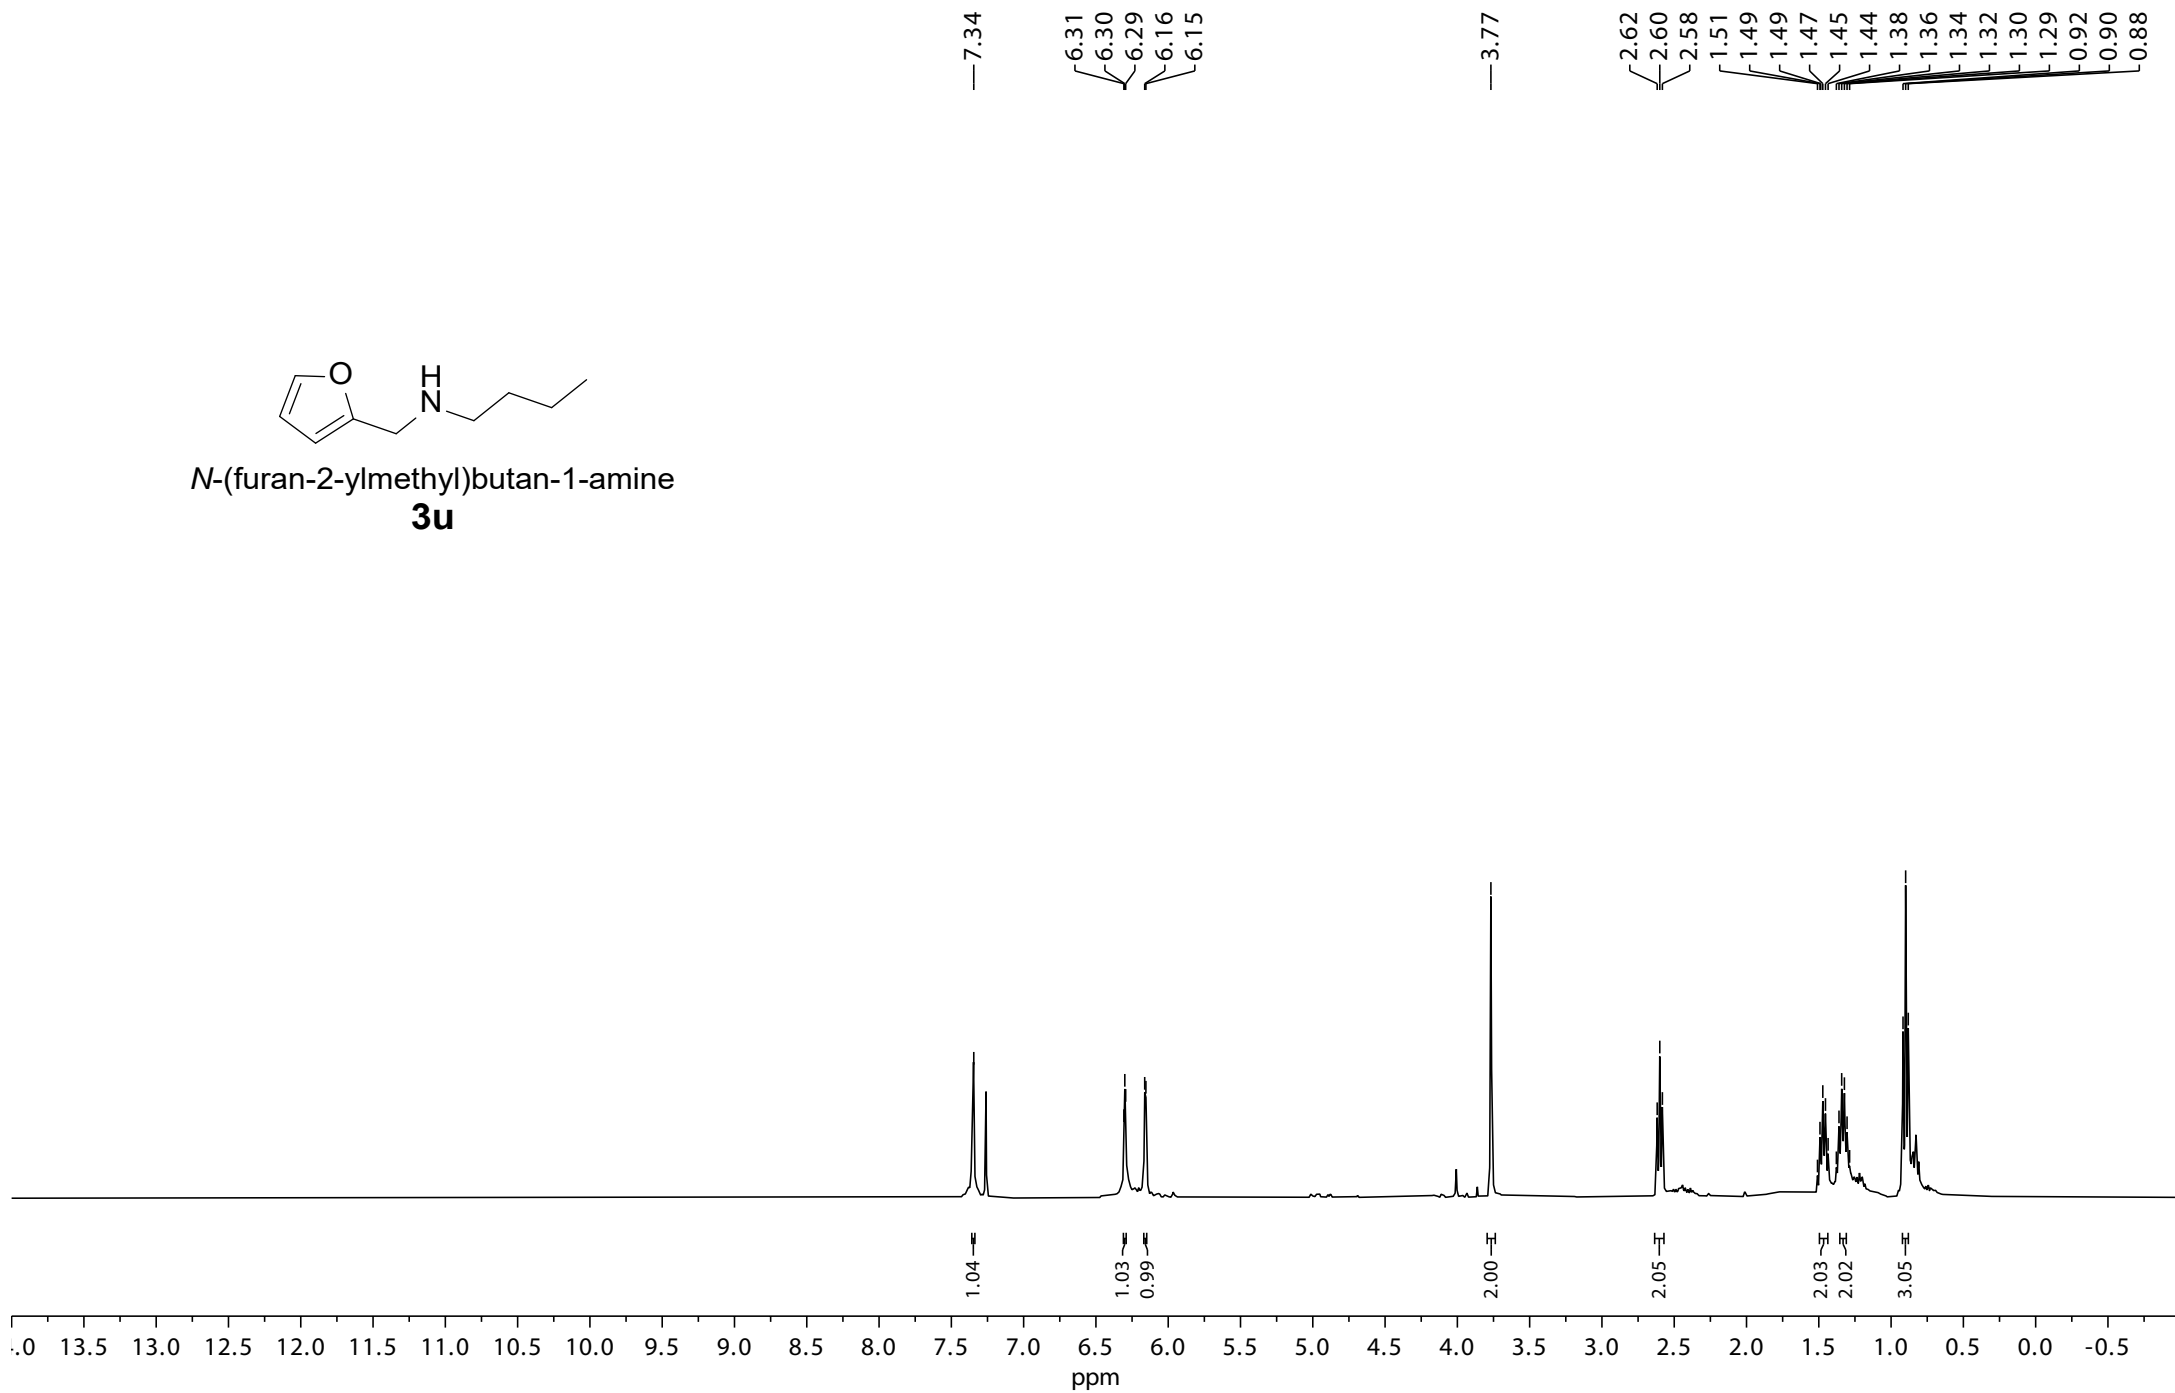



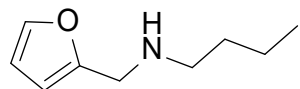

*N*-(furan-2-ylmethyl)butan-1-amine  
**3u**

—154.02

—141.70

—110.05

—106.74

—48.82

—46.21

—32.05

—20.42

—13.96

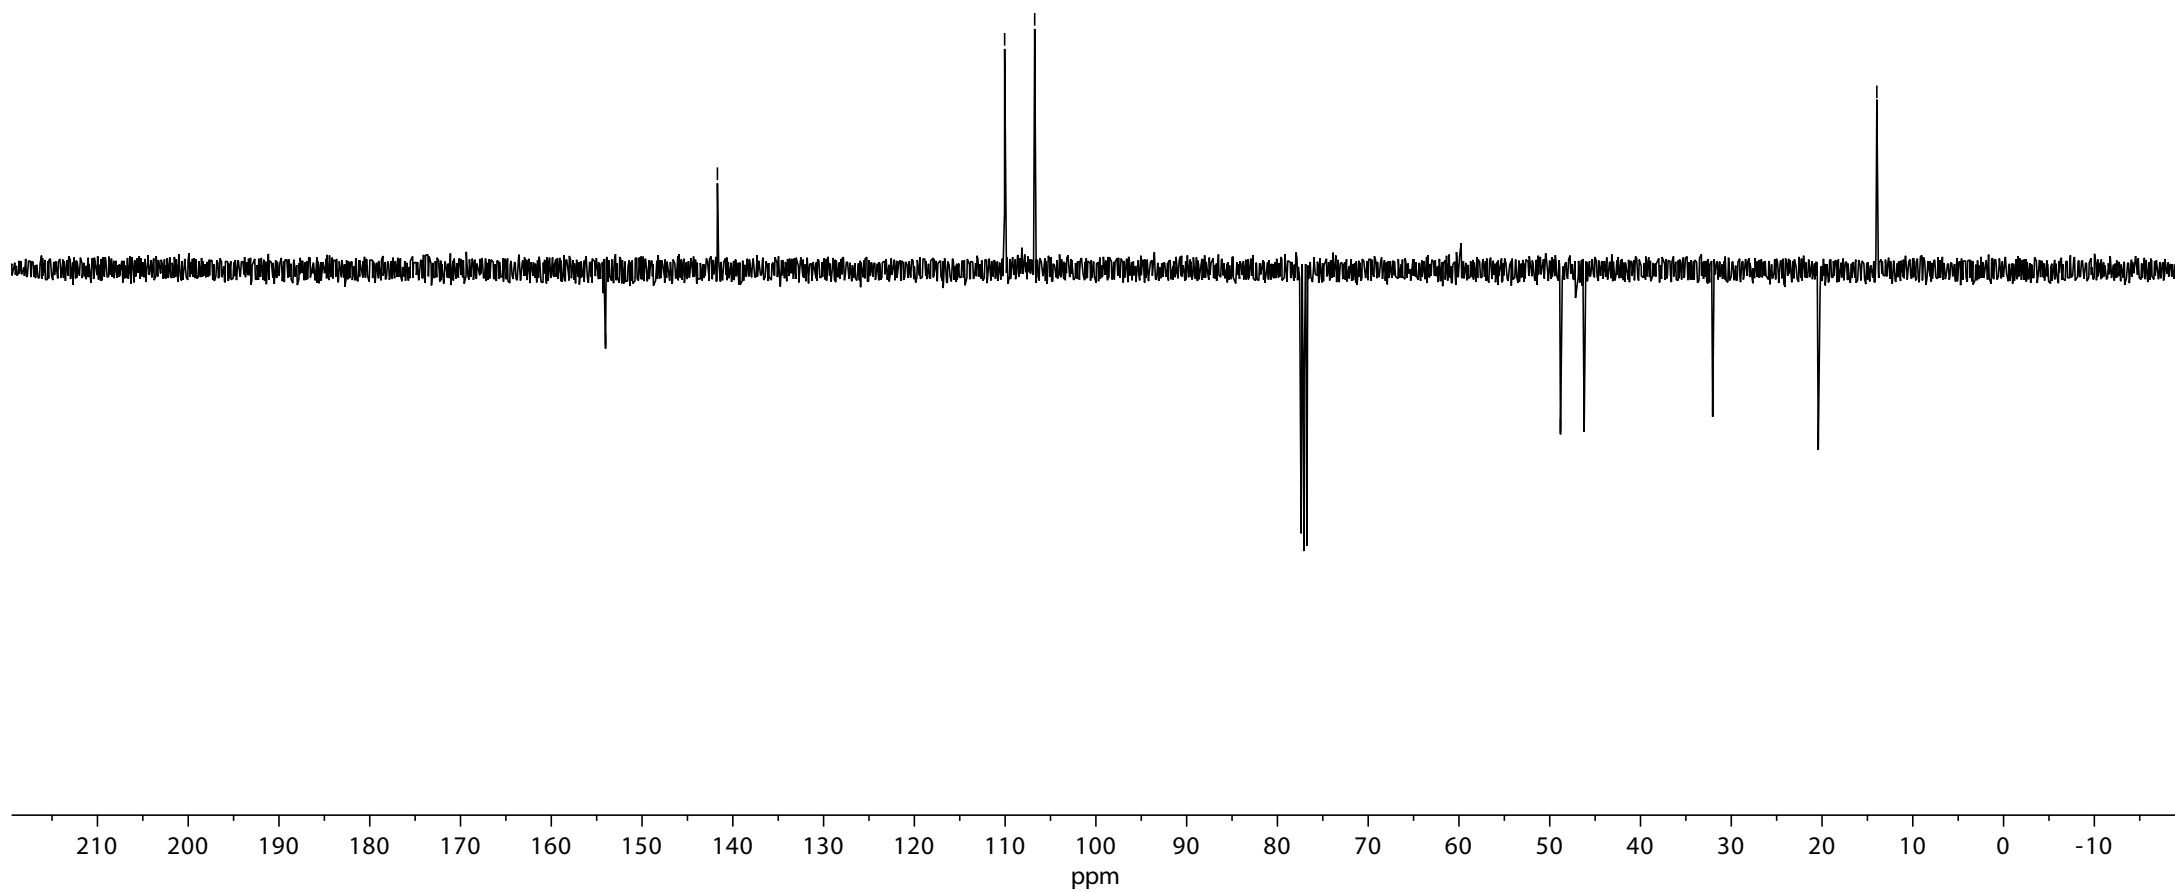

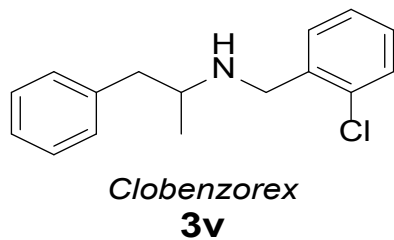

7.79  
7.79  
7.77  
7.77  
7.58  
7.57  
7.56  
7.55  
7.51  
7.51  
7.49  
7.49  
7.47  
7.47  
7.45  
7.44  
7.39  
7.37  
7.36  
7.34  
7.32  
7.30  
7.28

4.50  
3.72  
3.70  
3.69  
3.68  
3.67  
3.66  
3.44  
3.43  
3.41  
3.40  
2.88  
2.85  
2.85  
2.82  
1.37  
1.35

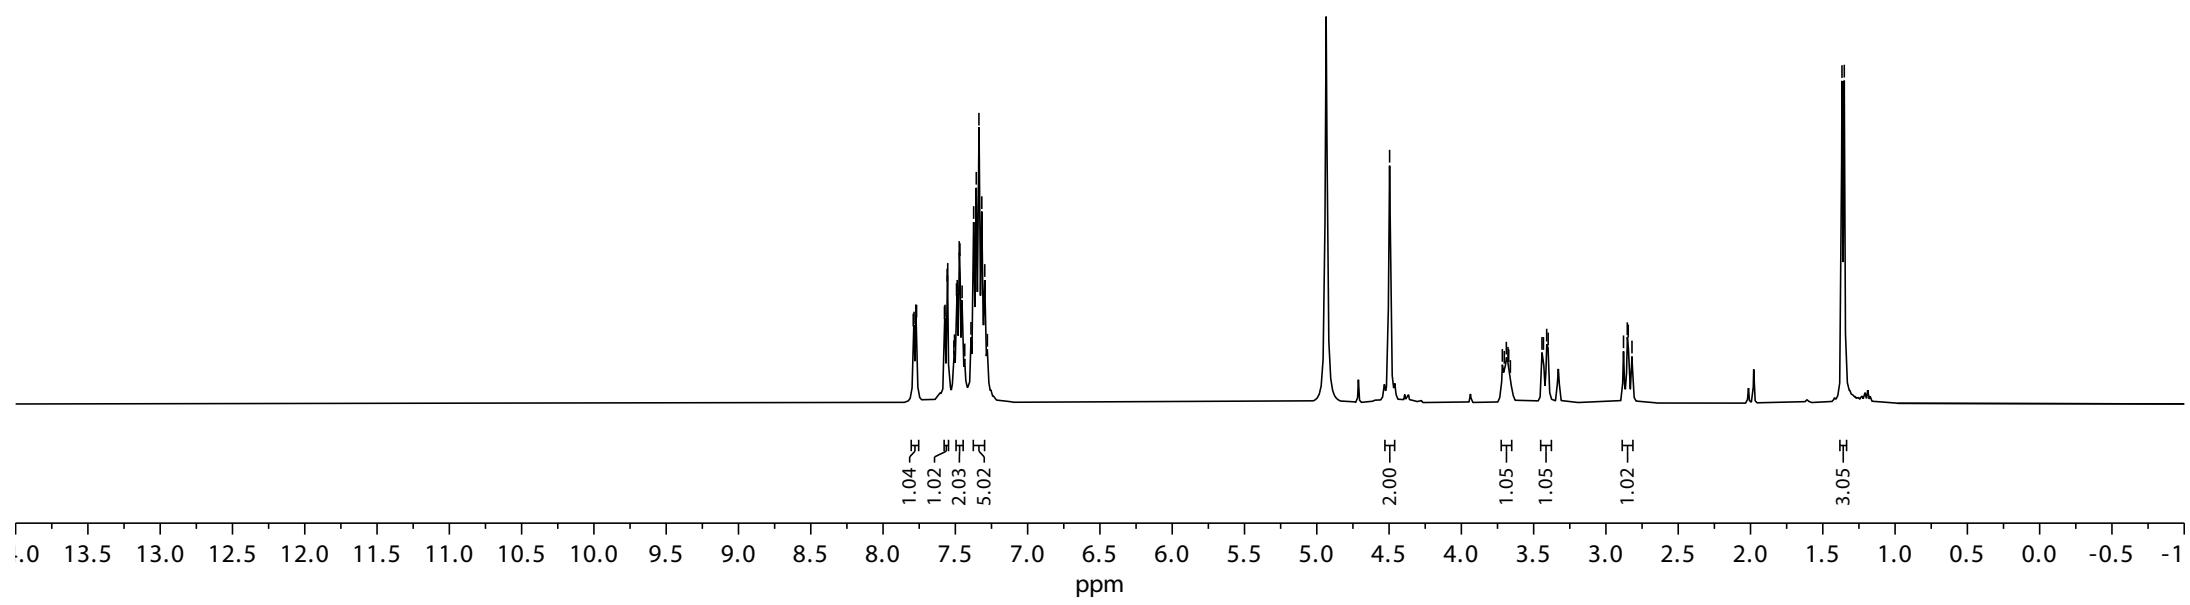

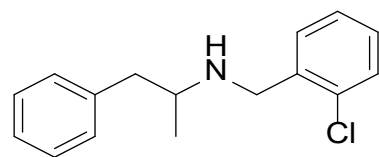

Clobenzorex  
**3v**

136.05  
134.48  
132.20  
131.24  
129.81  
129.37  
129.11  
128.61  
127.68  
126.99

—56.43

—45.64

—38.71

—14.68

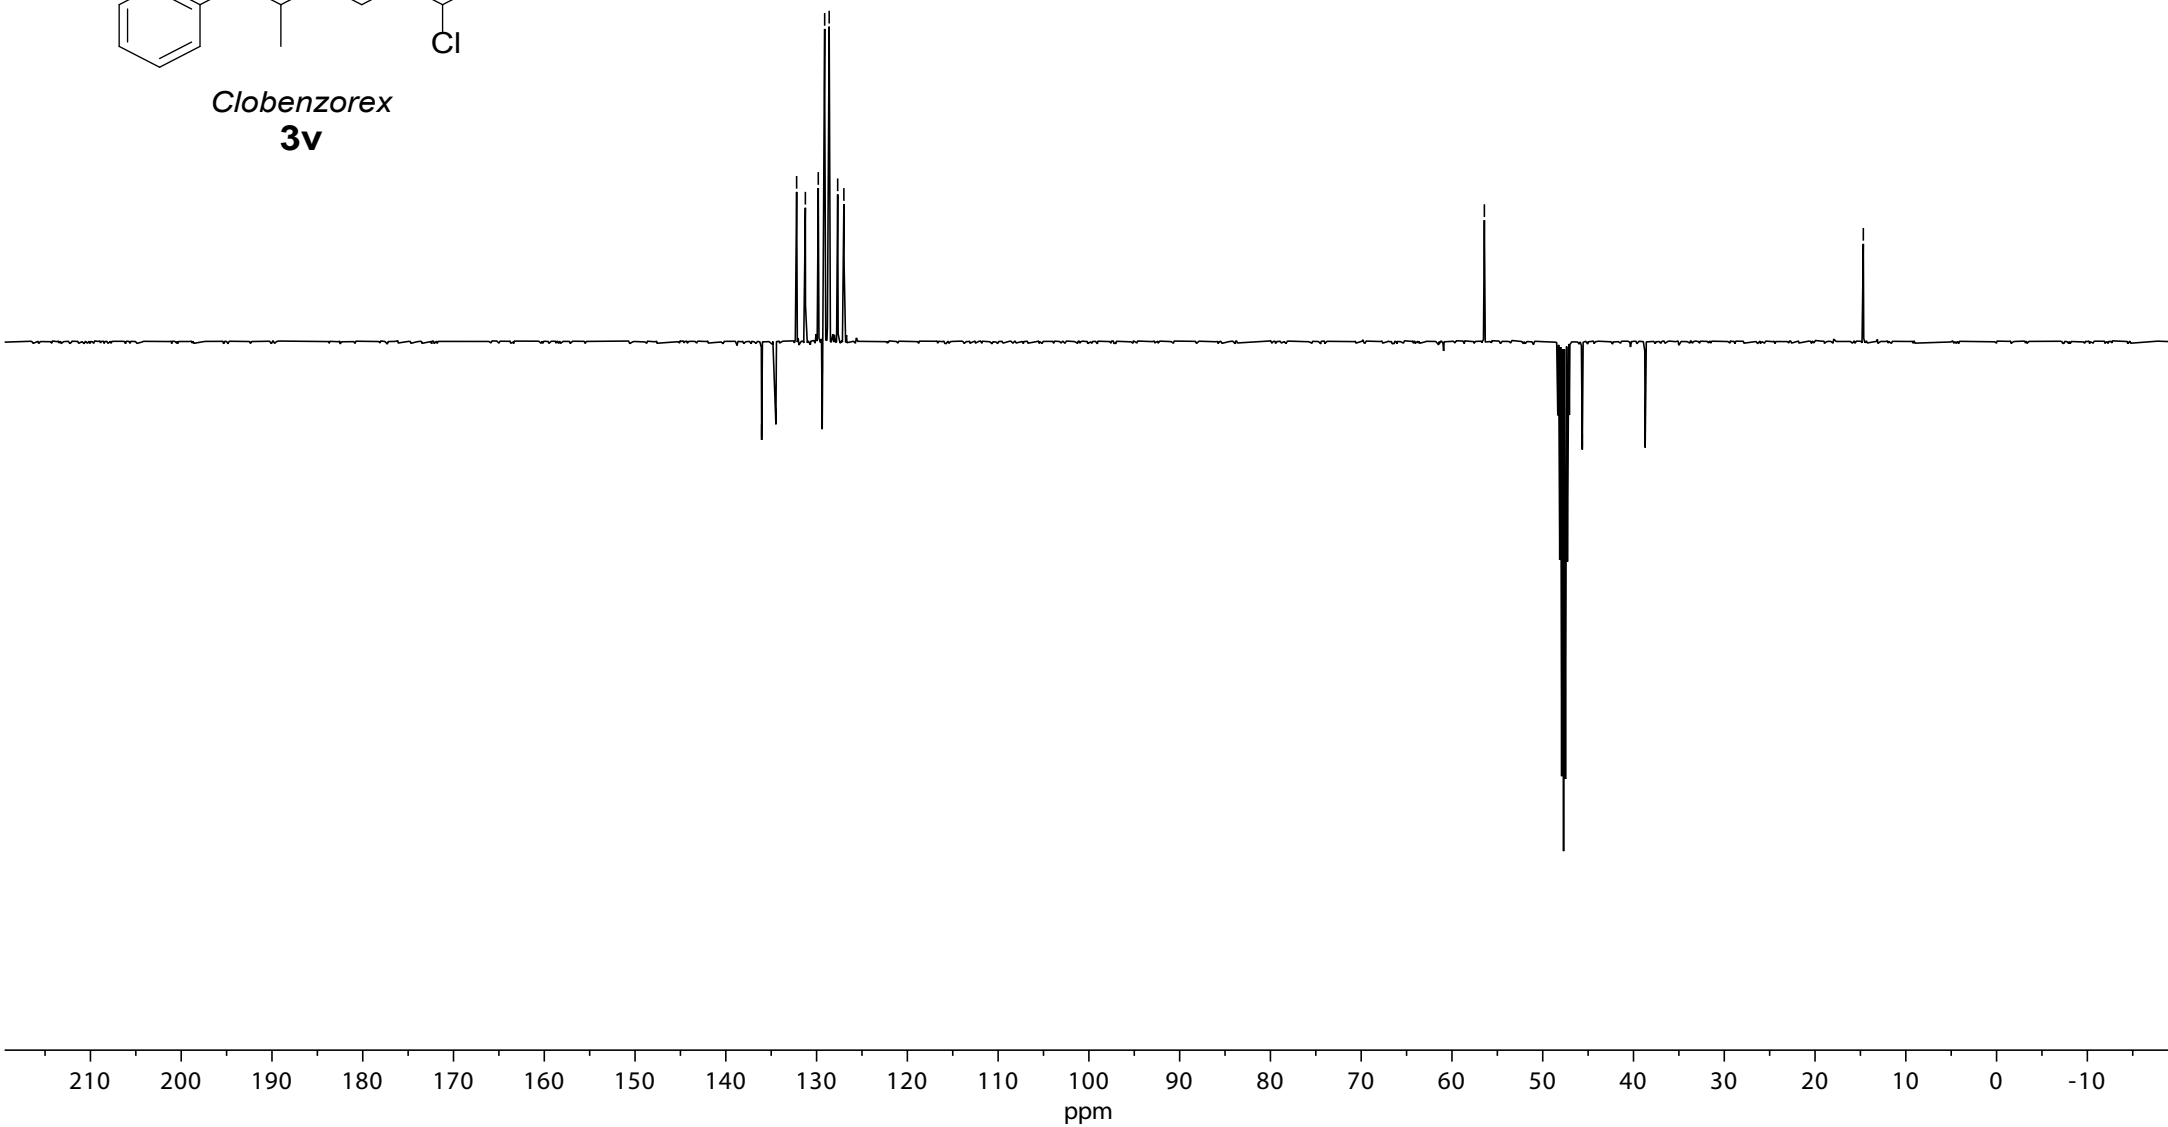

Supplement: d4gc04847d1.pdf [file d4gc04847d1.pdf]
